# Supplementary material for: Trends and cross-country disparity in the burden of COVID-19 between 2020 and 2021: a systematic analysis for the Global Burden of Disease Study 2021
Source: Research Square preprint supplement (doi:10.21203/rs.3.rs-5109929/v1), 2024-09-24
Supplement: Supplementary file 1 [file 10068b7f170431c5a542abf2.xlsx]

## Sheet: IHME-GBD_2021_DATA-e72c5a04-1
measure_id	measure_name	location_id	location_name	sex_id	sex_name	age_id	age_name	cause_id	cause_name	metric_id	metric_name	year	val	upper	lower
1	Deaths	1	Global	1	Male	1	<5 years	1048	COVID-19	1	Number	2020	5366.5	5768.96	5011.93
1	Deaths	1	Global	1	Male	6	5-9 years	1048	COVID-19	1	Number	2020	4091.02	4592.45	3397.7
1	Deaths	1	Global	1	Male	7	10-14 years	1048	COVID-19	1	Number	2020	5071.94	5699.56	4064.29
1	Deaths	1	Global	1	Male	8	15-19 years	1048	COVID-19	1	Number	2020	9291.24	9928.77	8815.52
1	Deaths	1	Global	1	Male	9	20-24 years	1048	COVID-19	1	Number	2020	15138.7	16083	14395.7
1	Deaths	1	Global	1	Male	10	25-29 years	1048	COVID-19	1	Number	2020	31125.2	33025.1	29603.9
1	Deaths	1	Global	1	Male	11	30-34 years	1048	COVID-19	1	Number	2020	56700.6	60513.9	53785.9
1	Deaths	1	Global	1	Male	12	35-39 years	1048	COVID-19	1	Number	2020	76815.7	82043.5	72813.3
1	Deaths	1	Global	1	Male	13	40-44 years	1048	COVID-19	1	Number	2020	113189	121123	106937
1	Deaths	1	Global	1	Male	14	45-49 years	1048	COVID-19	1	Number	2020	142370	152612	134302
1	Deaths	1	Global	1	Male	15	50-54 years	1048	COVID-19	1	Number	2020	174779	187681	164532
1	Deaths	1	Global	1	Male	16	55-59 years	1048	COVID-19	1	Number	2020	229814	246702	216334
1	Deaths	1	Global	1	Male	17	60-64 years	1048	COVID-19	1	Number	2020	308251	329513	290708
1	Deaths	1	Global	1	Male	18	65-69 years	1048	COVID-19	1	Number	2020	373298	399703	351822
1	Deaths	1	Global	1	Male	19	70-74 years	1048	COVID-19	1	Number	2020	374038	398700	354074
1	Deaths	1	Global	1	Male	20	75-79 years	1048	COVID-19	1	Number	2020	336783	358710	319972
1	Deaths	1	Global	1	Male	30	80-84 years	1048	COVID-19	1	Number	2020	314495	333556	299164
1	Deaths	1	Global	1	Male	31	85-89 years	1048	COVID-19	1	Number	2020	222425	235517	211524
1	Deaths	1	Global	1	Male	32	90-94 years	1048	COVID-19	1	Number	2020	128266	134874	122196
1	Deaths	1	Global	1	Male	235	95+ years	1048	COVID-19	1	Number	2020	45941.8	48392.2	43656
1	Deaths	1	Global	2	Female	1	<5 years	1048	COVID-19	1	Number	2020	4537.66	4902.68	4241.73
1	Deaths	1	Global	2	Female	6	5-9 years	1048	COVID-19	1	Number	2020	2959.81	3519.1	2287.7
1	Deaths	1	Global	2	Female	7	10-14 years	1048	COVID-19	1	Number	2020	3480.92	4235.54	2603.99
1	Deaths	1	Global	2	Female	8	15-19 years	1048	COVID-19	1	Number	2020	7739.96	8261.2	7329.57
1	Deaths	1	Global	2	Female	9	20-24 years	1048	COVID-19	1	Number	2020	10387.7	11063.1	9827.7
1	Deaths	1	Global	2	Female	10	25-29 years	1048	COVID-19	1	Number	2020	16729.8	17811.8	15830.7
1	Deaths	1	Global	2	Female	11	30-34 years	1048	COVID-19	1	Number	2020	24527.8	26160.9	23219.1
1	Deaths	1	Global	2	Female	12	35-39 years	1048	COVID-19	1	Number	2020	35406.9	37798.8	33518.5
1	Deaths	1	Global	2	Female	13	40-44 years	1048	COVID-19	1	Number	2020	52140.9	55722.7	49303.6
1	Deaths	1	Global	2	Female	14	45-49 years	1048	COVID-19	1	Number	2020	65558.1	70166.6	61873
1	Deaths	1	Global	2	Female	15	50-54 years	1048	COVID-19	1	Number	2020	78695	84315.9	74160.1
1	Deaths	1	Global	2	Female	16	55-59 years	1048	COVID-19	1	Number	2020	106326	113575	100128
1	Deaths	1	Global	2	Female	17	60-64 years	1048	COVID-19	1	Number	2020	152492	162425	144070
1	Deaths	1	Global	2	Female	18	65-69 years	1048	COVID-19	1	Number	2020	191039	203877	180752
1	Deaths	1	Global	2	Female	19	70-74 years	1048	COVID-19	1	Number	2020	211476	225110	200769
1	Deaths	1	Global	2	Female	20	75-79 years	1048	COVID-19	1	Number	2020	202699	215295	192689
1	Deaths	1	Global	2	Female	30	80-84 years	1048	COVID-19	1	Number	2020	236486	250290	225532
1	Deaths	1	Global	2	Female	31	85-89 years	1048	COVID-19	1	Number	2020	205319	216896	195909
1	Deaths	1	Global	2	Female	32	90-94 years	1048	COVID-19	1	Number	2020	152324	159794	145905
1	Deaths	1	Global	2	Female	235	95+ years	1048	COVID-19	1	Number	2020	74225.4	77508.4	71042.6
1	Deaths	1	Global	3	Both	1	<5 years	1048	COVID-19	1	Number	2020	9904.16	10689.5	9287.65
1	Deaths	1	Global	3	Both	6	5-9 years	1048	COVID-19	1	Number	2020	7050.82	8105.97	5762.8
1	Deaths	1	Global	3	Both	7	10-14 years	1048	COVID-19	1	Number	2020	8552.86	9827.15	6881.36
1	Deaths	1	Global	3	Both	8	15-19 years	1048	COVID-19	1	Number	2020	17031.2	18124.4	16197.4
1	Deaths	1	Global	3	Both	9	20-24 years	1048	COVID-19	1	Number	2020	25526.4	27030.2	24325.9
1	Deaths	1	Global	3	Both	10	25-29 years	1048	COVID-19	1	Number	2020	47855	50883.8	45512.1
1	Deaths	1	Global	3	Both	11	30-34 years	1048	COVID-19	1	Number	2020	81228.5	86803.3	77165.8
1	Deaths	1	Global	3	Both	12	35-39 years	1048	COVID-19	1	Number	2020	112223	119830	106592
1	Deaths	1	Global	3	Both	13	40-44 years	1048	COVID-19	1	Number	2020	165330	176605	156746
1	Deaths	1	Global	3	Both	14	45-49 years	1048	COVID-19	1	Number	2020	207928	222732	196524
1	Deaths	1	Global	3	Both	15	50-54 years	1048	COVID-19	1	Number	2020	253474	271867	239534
1	Deaths	1	Global	3	Both	16	55-59 years	1048	COVID-19	1	Number	2020	336140	360168	317251
1	Deaths	1	Global	3	Both	17	60-64 years	1048	COVID-19	1	Number	2020	460743	492119	435415
1	Deaths	1	Global	3	Both	18	65-69 years	1048	COVID-19	1	Number	2020	564337	604091	534369
1	Deaths	1	Global	3	Both	19	70-74 years	1048	COVID-19	1	Number	2020	585514	623657	556123
1	Deaths	1	Global	3	Both	20	75-79 years	1048	COVID-19	1	Number	2020	539482	573392	513974
1	Deaths	1	Global	3	Both	30	80-84 years	1048	COVID-19	1	Number	2020	550981	583217	526142
1	Deaths	1	Global	3	Both	31	85-89 years	1048	COVID-19	1	Number	2020	427744	451334	408943
1	Deaths	1	Global	3	Both	32	90-94 years	1048	COVID-19	1	Number	2020	280591	294515	268425
1	Deaths	1	Global	3	Both	235	95+ years	1048	COVID-19	1	Number	2020	120167	125730	114872
1	Deaths	44634	High-middle SDI	1	Male	1	<5 years	1048	COVID-19	1	Number	2020	200.937	231.744	172.674
1	Deaths	44634	High-middle SDI	1	Male	6	5-9 years	1048	COVID-19	1	Number	2020	146.295	179.721	122.539
1	Deaths	44634	High-middle SDI	1	Male	7	10-14 years	1048	COVID-19	1	Number	2020	190.027	225.207	158.612
1	Deaths	44634	High-middle SDI	1	Male	8	15-19 years	1048	COVID-19	1	Number	2020	359.96	407.388	315.613
1	Deaths	44634	High-middle SDI	1	Male	9	20-24 years	1048	COVID-19	1	Number	2020	668.121	747.862	594.669
1	Deaths	44634	High-middle SDI	1	Male	10	25-29 years	1048	COVID-19	1	Number	2020	1697.36	1868.1	1535.11
1	Deaths	44634	High-middle SDI	1	Male	11	30-34 years	1048	COVID-19	1	Number	2020	3938.73	4363.06	3560.18
1	Deaths	44634	High-middle SDI	1	Male	12	35-39 years	1048	COVID-19	1	Number	2020	6015.74	6727.53	5370.17
1	Deaths	44634	High-middle SDI	1	Male	13	40-44 years	1048	COVID-19	1	Number	2020	10138.2	11306.9	9061.34
1	Deaths	44634	High-middle SDI	1	Male	14	45-49 years	1048	COVID-19	1	Number	2020	13401.1	15033	11861.8
1	Deaths	44634	High-middle SDI	1	Male	15	50-54 years	1048	COVID-19	1	Number	2020	17732.7	19893.8	15676.3
1	Deaths	44634	High-middle SDI	1	Male	16	55-59 years	1048	COVID-19	1	Number	2020	26900.5	30242.9	23776.9
1	Deaths	44634	High-middle SDI	1	Male	17	60-64 years	1048	COVID-19	1	Number	2020	39421	43976.9	35080
1	Deaths	44634	High-middle SDI	1	Male	18	65-69 years	1048	COVID-19	1	Number	2020	50916.6	56664.5	45603.9
1	Deaths	44634	High-middle SDI	1	Male	19	70-74 years	1048	COVID-19	1	Number	2020	53752.1	59031.1	48574.4
1	Deaths	44634	High-middle SDI	1	Male	20	75-79 years	1048	COVID-19	1	Number	2020	45473.4	49523.1	41446.6
1	Deaths	44634	High-middle SDI	1	Male	30	80-84 years	1048	COVID-19	1	Number	2020	51301	55789.7	46993.2
1	Deaths	44634	High-middle SDI	1	Male	31	85-89 years	1048	COVID-19	1	Number	2020	42123.5	45419.3	38926.1
1	Deaths	44634	High-middle SDI	1	Male	32	90-94 years	1048	COVID-19	1	Number	2020	24243	25978.4	22538.5
1	Deaths	44634	High-middle SDI	1	Male	235	95+ years	1048	COVID-19	1	Number	2020	7165.98	7673.35	6640.79
1	Deaths	44634	High-middle SDI	2	Female	1	<5 years	1048	COVID-19	1	Number	2020	171.68	196.658	152.069
1	Deaths	44634	High-middle SDI	2	Female	6	5-9 years	1048	COVID-19	1	Number	2020	115.248	138.336	96.2964
1	Deaths	44634	High-middle SDI	2	Female	7	10-14 years	1048	COVID-19	1	Number	2020	148.353	175.722	127.095
1	Deaths	44634	High-middle SDI	2	Female	8	15-19 years	1048	COVID-19	1	Number	2020	329.909	366.001	293.35
1	Deaths	44634	High-middle SDI	2	Female	9	20-24 years	1048	COVID-19	1	Number	2020	495.432	556.626	439.007
1	Deaths	44634	High-middle SDI	2	Female	10	25-29 years	1048	COVID-19	1	Number	2020	936.565	1054.79	829.852
1	Deaths	44634	High-middle SDI	2	Female	11	30-34 years	1048	COVID-19	1	Number	2020	1802.66	2043.16	1591.3
1	Deaths	44634	High-middle SDI	2	Female	12	35-39 years	1048	COVID-19	1	Number	2020	2774.25	3137.23	2432.81
1	Deaths	44634	High-middle SDI	2	Female	13	40-44 years	1048	COVID-19	1	Number	2020	4747.6	5303.85	4238.17
1	Deaths	44634	High-middle SDI	2	Female	14	45-49 years	1048	COVID-19	1	Number	2020	6514.2	7276.99	5830.63
1	Deaths	44634	High-middle SDI	2	Female	15	50-54 years	1048	COVID-19	1	Number	2020	8493.61	9517.79	7618.45
1	Deaths	44634	High-middle SDI	2	Female	16	55-59 years	1048	COVID-19	1	Number	2020	13108.8	14676.6	11750.4
1	Deaths	44634	High-middle SDI	2	Female	17	60-64 years	1048	COVID-19	1	Number	2020	21266.8	23730.4	19113.6
1	Deaths	44634	High-middle SDI	2	Female	18	65-69 years	1048	COVID-19	1	Number	2020	29256.3	32583.6	26349.9
1	Deaths	44634	High-middle SDI	2	Female	19	70-74 years	1048	COVID-19	1	Number	2020	35119	38888.6	31722.7
1	Deaths	44634	High-middle SDI	2	Female	20	75-79 years	1048	COVID-19	1	Number	2020	33616.9	37150.4	30702.7
1	Deaths	44634	High-middle SDI	2	Female	30	80-84 years	1048	COVID-19	1	Number	2020	53796.6	58981.8	49656.1
1	Deaths	44634	High-middle SDI	2	Female	31	85-89 years	1048	COVID-19	1	Number	2020	46653.4	50760.2	43070.7
1	Deaths	44634	High-middle SDI	2	Female	32	90-94 years	1048	COVID-19	1	Number	2020	37104.1	39804.8	34761.8
1	Deaths	44634	High-middle SDI	2	Female	235	95+ years	1048	COVID-19	1	Number	2020	16492.4	17620.7	15503.3
1	Deaths	44634	High-middle SDI	3	Both	1	<5 years	1048	COVID-19	1	Number	2020	372.617	426.244	325.384
1	Deaths	44634	High-middle SDI	3	Both	6	5-9 years	1048	COVID-19	1	Number	2020	261.544	318.446	222.593
1	Deaths	44634	High-middle SDI	3	Both	7	10-14 years	1048	COVID-19	1	Number	2020	338.38	397.641	291.675
1	Deaths	44634	High-middle SDI	3	Both	8	15-19 years	1048	COVID-19	1	Number	2020	689.87	769.002	614.403
1	Deaths	44634	High-middle SDI	3	Both	9	20-24 years	1048	COVID-19	1	Number	2020	1163.55	1291.21	1042.86
1	Deaths	44634	High-middle SDI	3	Both	10	25-29 years	1048	COVID-19	1	Number	2020	2633.93	2900.41	2390.31
1	Deaths	44634	High-middle SDI	3	Both	11	30-34 years	1048	COVID-19	1	Number	2020	5741.39	6331.19	5230.55
1	Deaths	44634	High-middle SDI	3	Both	12	35-39 years	1048	COVID-19	1	Number	2020	8789.99	9710.62	7947.3
1	Deaths	44634	High-middle SDI	3	Both	13	40-44 years	1048	COVID-19	1	Number	2020	14885.8	16434.5	13485.6
1	Deaths	44634	High-middle SDI	3	Both	14	45-49 years	1048	COVID-19	1	Number	2020	19915.3	22030.1	18038.4
1	Deaths	44634	High-middle SDI	3	Both	15	50-54 years	1048	COVID-19	1	Number	2020	26226.4	29032.2	23765.3
1	Deaths	44634	High-middle SDI	3	Both	16	55-59 years	1048	COVID-19	1	Number	2020	40009.3	44230.6	36315.7
1	Deaths	44634	High-middle SDI	3	Both	17	60-64 years	1048	COVID-19	1	Number	2020	60687.8	66808.7	55264.5
1	Deaths	44634	High-middle SDI	3	Both	18	65-69 years	1048	COVID-19	1	Number	2020	80172.9	88318.9	72902.4
1	Deaths	44634	High-middle SDI	3	Both	19	70-74 years	1048	COVID-19	1	Number	2020	88871.1	97158.1	80990
1	Deaths	44634	High-middle SDI	3	Both	20	75-79 years	1048	COVID-19	1	Number	2020	79090.3	86294.4	72600.4
1	Deaths	44634	High-middle SDI	3	Both	30	80-84 years	1048	COVID-19	1	Number	2020	105098	114151	97394.4
1	Deaths	44634	High-middle SDI	3	Both	31	85-89 years	1048	COVID-19	1	Number	2020	88776.9	95941.4	82478.3
1	Deaths	44634	High-middle SDI	3	Both	32	90-94 years	1048	COVID-19	1	Number	2020	61347.1	65750.7	57558.5
1	Deaths	44634	High-middle SDI	3	Both	235	95+ years	1048	COVID-19	1	Number	2020	23658.4	25239	22157.1
1	Deaths	44635	High SDI	1	Male	1	<5 years	1048	COVID-19	1	Number	2020	103.816	146.9	64.3526
1	Deaths	44635	High SDI	1	Male	6	5-9 years	1048	COVID-19	1	Number	2020	66.7368	76.1413	58.7946
1	Deaths	44635	High SDI	1	Male	7	10-14 years	1048	COVID-19	1	Number	2020	98.1077	104.443	90.824
1	Deaths	44635	High SDI	1	Male	8	15-19 years	1048	COVID-19	1	Number	2020	1637.1	1703.77	1577.21
1	Deaths	44635	High SDI	1	Male	9	20-24 years	1048	COVID-19	1	Number	2020	3082.6	3194.57	2975.83
1	Deaths	44635	High SDI	1	Male	10	25-29 years	1048	COVID-19	1	Number	2020	4732.37	4902.42	4570.92
1	Deaths	44635	High SDI	1	Male	11	30-34 years	1048	COVID-19	1	Number	2020	7290.41	7646.83	7007.05
1	Deaths	44635	High SDI	1	Male	12	35-39 years	1048	COVID-19	1	Number	2020	9003.71	9414.28	8620.76
1	Deaths	44635	High SDI	1	Male	13	40-44 years	1048	COVID-19	1	Number	2020	11153.2	11610.1	10650.4
1	Deaths	44635	High SDI	1	Male	14	45-49 years	1048	COVID-19	1	Number	2020	14182.4	14748.8	13554.3
1	Deaths	44635	High SDI	1	Male	15	50-54 years	1048	COVID-19	1	Number	2020	18630.8	19344.1	17862.9
1	Deaths	44635	High SDI	1	Male	16	55-59 years	1048	COVID-19	1	Number	2020	26560	27581.7	25456.4
1	Deaths	44635	High SDI	1	Male	17	60-64 years	1048	COVID-19	1	Number	2020	37843	39338.4	36219.2
1	Deaths	44635	High SDI	1	Male	18	65-69 years	1048	COVID-19	1	Number	2020	47022.9	48978.9	44921.5
1	Deaths	44635	High SDI	1	Male	19	70-74 years	1048	COVID-19	1	Number	2020	53359.2	55512.1	51093.2
1	Deaths	44635	High SDI	1	Male	20	75-79 years	1048	COVID-19	1	Number	2020	56531.5	58593.8	54343
1	Deaths	44635	High SDI	1	Male	30	80-84 years	1048	COVID-19	1	Number	2020	58635	60880.8	56370.4
1	Deaths	44635	High SDI	1	Male	31	85-89 years	1048	COVID-19	1	Number	2020	51272.6	53010.6	49444.3
1	Deaths	44635	High SDI	1	Male	32	90-94 years	1048	COVID-19	1	Number	2020	33938.2	35023.6	32748.3
1	Deaths	44635	High SDI	1	Male	235	95+ years	1048	COVID-19	1	Number	2020	13129.1	13589	12640.3
1	Deaths	44635	High SDI	2	Female	1	<5 years	1048	COVID-19	1	Number	2020	77.3298	107.369	51.1618
1	Deaths	44635	High SDI	2	Female	6	5-9 years	1048	COVID-19	1	Number	2020	42.3978	46.9013	38.6237
1	Deaths	44635	High SDI	2	Female	7	10-14 years	1048	COVID-19	1	Number	2020	100.643	106.221	95.7951
1	Deaths	44635	High SDI	2	Female	8	15-19 years	1048	COVID-19	1	Number	2020	529.004	546.435	511.897
1	Deaths	44635	High SDI	2	Female	9	20-24 years	1048	COVID-19	1	Number	2020	1005.28	1040.65	973.818
1	Deaths	44635	High SDI	2	Female	10	25-29 years	1048	COVID-19	1	Number	2020	1918.15	1987.75	1849.67
1	Deaths	44635	High SDI	2	Female	11	30-34 years	1048	COVID-19	1	Number	2020	2657.57	2751.12	2565.35
1	Deaths	44635	High SDI	2	Female	12	35-39 years	1048	COVID-19	1	Number	2020	3547.07	3686.36	3418.25
1	Deaths	44635	High SDI	2	Female	13	40-44 years	1048	COVID-19	1	Number	2020	4806.54	4991.62	4617.91
1	Deaths	44635	High SDI	2	Female	14	45-49 years	1048	COVID-19	1	Number	2020	6232.3	6469.19	5991.21
1	Deaths	44635	High SDI	2	Female	15	50-54 years	1048	COVID-19	1	Number	2020	8318.86	8626.79	8010.15
1	Deaths	44635	High SDI	2	Female	16	55-59 years	1048	COVID-19	1	Number	2020	12381.8	12823.6	11931.9
1	Deaths	44635	High SDI	2	Female	17	60-64 years	1048	COVID-19	1	Number	2020	19155.2	19873.3	18442.2
1	Deaths	44635	High SDI	2	Female	18	65-69 years	1048	COVID-19	1	Number	2020	26067.1	27086.4	25068.2
1	Deaths	44635	High SDI	2	Female	19	70-74 years	1048	COVID-19	1	Number	2020	31954.5	33176.5	30751
1	Deaths	44635	High SDI	2	Female	20	75-79 years	1048	COVID-19	1	Number	2020	38599.5	39886.5	37230.1
1	Deaths	44635	High SDI	2	Female	30	80-84 years	1048	COVID-19	1	Number	2020	48193.3	49884.1	46454.9
1	Deaths	44635	High SDI	2	Female	31	85-89 years	1048	COVID-19	1	Number	2020	57409.9	59394.5	55397.1
1	Deaths	44635	High SDI	2	Female	32	90-94 years	1048	COVID-19	1	Number	2020	52890.9	54634.3	51098.2
1	Deaths	44635	High SDI	2	Female	235	95+ years	1048	COVID-19	1	Number	2020	32916.6	33915.3	31794.9
1	Deaths	44635	High SDI	3	Both	1	<5 years	1048	COVID-19	1	Number	2020	181.146	244.721	122.543
1	Deaths	44635	High SDI	3	Both	6	5-9 years	1048	COVID-19	1	Number	2020	109.135	124.073	99.2461
1	Deaths	44635	High SDI	3	Both	7	10-14 years	1048	COVID-19	1	Number	2020	198.751	209.417	187.374
1	Deaths	44635	High SDI	3	Both	8	15-19 years	1048	COVID-19	1	Number	2020	2166.1	2246.71	2091.84
1	Deaths	44635	High SDI	3	Both	9	20-24 years	1048	COVID-19	1	Number	2020	4087.87	4225.87	3957.26
1	Deaths	44635	High SDI	3	Both	10	25-29 years	1048	COVID-19	1	Number	2020	6650.52	6888.41	6423.99
1	Deaths	44635	High SDI	3	Both	11	30-34 years	1048	COVID-19	1	Number	2020	9947.98	10373.3	9573.42
1	Deaths	44635	High SDI	3	Both	12	35-39 years	1048	COVID-19	1	Number	2020	12550.8	13088.8	12062
1	Deaths	44635	High SDI	3	Both	13	40-44 years	1048	COVID-19	1	Number	2020	15959.7	16590.4	15280.9
1	Deaths	44635	High SDI	3	Both	14	45-49 years	1048	COVID-19	1	Number	2020	20414.7	21172.6	19602.7
1	Deaths	44635	High SDI	3	Both	15	50-54 years	1048	COVID-19	1	Number	2020	26949.6	27894.2	25906.1
1	Deaths	44635	High SDI	3	Both	16	55-59 years	1048	COVID-19	1	Number	2020	38941.8	40364.9	37465.6
1	Deaths	44635	High SDI	3	Both	17	60-64 years	1048	COVID-19	1	Number	2020	56998.2	59192.1	54810.1
1	Deaths	44635	High SDI	3	Both	18	65-69 years	1048	COVID-19	1	Number	2020	73089.9	76043.1	70147.8
1	Deaths	44635	High SDI	3	Both	19	70-74 years	1048	COVID-19	1	Number	2020	85313.7	88678	81999.8
1	Deaths	44635	High SDI	3	Both	20	75-79 years	1048	COVID-19	1	Number	2020	95130.9	98374.3	91693.4
1	Deaths	44635	High SDI	3	Both	30	80-84 years	1048	COVID-19	1	Number	2020	106828	110541	102991
1	Deaths	44635	High SDI	3	Both	31	85-89 years	1048	COVID-19	1	Number	2020	108683	112259	104977
1	Deaths	44635	High SDI	3	Both	32	90-94 years	1048	COVID-19	1	Number	2020	86829	89531.7	83941.6
1	Deaths	44635	High SDI	3	Both	235	95+ years	1048	COVID-19	1	Number	2020	46045.7	47517.3	44476.6
1	Deaths	44636	Low-middle SDI	1	Male	1	<5 years	1048	COVID-19	1	Number	2020	1978.33	2125.98	1840.05
1	Deaths	44636	Low-middle SDI	1	Male	6	5-9 years	1048	COVID-19	1	Number	2020	1508.28	1732.68	1128.98
1	Deaths	44636	Low-middle SDI	1	Male	7	10-14 years	1048	COVID-19	1	Number	2020	2033.7	2344.23	1488.34
1	Deaths	44636	Low-middle SDI	1	Male	8	15-19 years	1048	COVID-19	1	Number	2020	3069.94	3282.07	2894.11
1	Deaths	44636	Low-middle SDI	1	Male	9	20-24 years	1048	COVID-19	1	Number	2020	5045.38	5386.46	4745.98
1	Deaths	44636	Low-middle SDI	1	Male	10	25-29 years	1048	COVID-19	1	Number	2020	10741.5	11452.6	10102.8
1	Deaths	44636	Low-middle SDI	1	Male	11	30-34 years	1048	COVID-19	1	Number	2020	19795.3	21133.5	18568
1	Deaths	44636	Low-middle SDI	1	Male	12	35-39 years	1048	COVID-19	1	Number	2020	26658	28489.8	24993.7
1	Deaths	44636	Low-middle SDI	1	Male	13	40-44 years	1048	COVID-19	1	Number	2020	39005.2	41714.3	36519.5
1	Deaths	44636	Low-middle SDI	1	Male	14	45-49 years	1048	COVID-19	1	Number	2020	47166.7	50447.1	44110.6
1	Deaths	44636	Low-middle SDI	1	Male	15	50-54 years	1048	COVID-19	1	Number	2020	56693.2	60677	52918.2
1	Deaths	44636	Low-middle SDI	1	Male	16	55-59 years	1048	COVID-19	1	Number	2020	72570.1	77658.9	67659.5
1	Deaths	44636	Low-middle SDI	1	Male	17	60-64 years	1048	COVID-19	1	Number	2020	97132.6	103988	90555.9
1	Deaths	44636	Low-middle SDI	1	Male	18	65-69 years	1048	COVID-19	1	Number	2020	119090	127247	110996
1	Deaths	44636	Low-middle SDI	1	Male	19	70-74 years	1048	COVID-19	1	Number	2020	119806	127877	111826
1	Deaths	44636	Low-middle SDI	1	Male	20	75-79 years	1048	COVID-19	1	Number	2020	105534	112628	98561.2
1	Deaths	44636	Low-middle SDI	1	Male	30	80-84 years	1048	COVID-19	1	Number	2020	89706.6	95635	83866.7
1	Deaths	44636	Low-middle SDI	1	Male	31	85-89 years	1048	COVID-19	1	Number	2020	53761.1	57389.5	50227.1
1	Deaths	44636	Low-middle SDI	1	Male	32	90-94 years	1048	COVID-19	1	Number	2020	29876.5	31835.6	27866.5
1	Deaths	44636	Low-middle SDI	1	Male	235	95+ years	1048	COVID-19	1	Number	2020	10229.3	10900.6	9524.78
1	Deaths	44636	Low-middle SDI	2	Female	1	<5 years	1048	COVID-19	1	Number	2020	1664.9	1801.37	1550.35
1	Deaths	44636	Low-middle SDI	2	Female	6	5-9 years	1048	COVID-19	1	Number	2020	1021.89	1300.27	655.805
1	Deaths	44636	Low-middle SDI	2	Female	7	10-14 years	1048	COVID-19	1	Number	2020	1216.51	1574.97	811.522
1	Deaths	44636	Low-middle SDI	2	Female	8	15-19 years	1048	COVID-19	1	Number	2020	2816.95	3011.89	2653.7
1	Deaths	44636	Low-middle SDI	2	Female	9	20-24 years	1048	COVID-19	1	Number	2020	3764.34	4017.97	3540.98
1	Deaths	44636	Low-middle SDI	2	Female	10	25-29 years	1048	COVID-19	1	Number	2020	5871.34	6273.05	5519.74
1	Deaths	44636	Low-middle SDI	2	Female	11	30-34 years	1048	COVID-19	1	Number	2020	8594.83	9183.03	8069.69
1	Deaths	44636	Low-middle SDI	2	Female	12	35-39 years	1048	COVID-19	1	Number	2020	12362.5	13239.1	11610.5
1	Deaths	44636	Low-middle SDI	2	Female	13	40-44 years	1048	COVID-19	1	Number	2020	17980.8	19257.1	16865
1	Deaths	44636	Low-middle SDI	2	Female	14	45-49 years	1048	COVID-19	1	Number	2020	21967.6	23517.2	20607.9
1	Deaths	44636	Low-middle SDI	2	Female	15	50-54 years	1048	COVID-19	1	Number	2020	25046	26856.7	23439
1	Deaths	44636	Low-middle SDI	2	Female	16	55-59 years	1048	COVID-19	1	Number	2020	32205.1	34541.5	30125.9
1	Deaths	44636	Low-middle SDI	2	Female	17	60-64 years	1048	COVID-19	1	Number	2020	45930.1	49211.3	43008.4
1	Deaths	44636	Low-middle SDI	2	Female	18	65-69 years	1048	COVID-19	1	Number	2020	56840.6	60850.3	53234.5
1	Deaths	44636	Low-middle SDI	2	Female	19	70-74 years	1048	COVID-19	1	Number	2020	62881.8	67061.6	59048.8
1	Deaths	44636	Low-middle SDI	2	Female	20	75-79 years	1048	COVID-19	1	Number	2020	56799.6	60616.8	53313.5
1	Deaths	44636	Low-middle SDI	2	Female	30	80-84 years	1048	COVID-19	1	Number	2020	58586	62452.6	55150.6
1	Deaths	44636	Low-middle SDI	2	Female	31	85-89 years	1048	COVID-19	1	Number	2020	40207.8	42818.8	37799.7
1	Deaths	44636	Low-middle SDI	2	Female	32	90-94 years	1048	COVID-19	1	Number	2020	24783.3	26365.1	23344.8
1	Deaths	44636	Low-middle SDI	2	Female	235	95+ years	1048	COVID-19	1	Number	2020	10233.8	10871.4	9640.06
1	Deaths	44636	Low-middle SDI	3	Both	1	<5 years	1048	COVID-19	1	Number	2020	3643.22	3917.31	3404.68
1	Deaths	44636	Low-middle SDI	3	Both	6	5-9 years	1048	COVID-19	1	Number	2020	2530.17	2985.59	1816.81
1	Deaths	44636	Low-middle SDI	3	Both	7	10-14 years	1048	COVID-19	1	Number	2020	3250.21	3911.11	2378.75
1	Deaths	44636	Low-middle SDI	3	Both	8	15-19 years	1048	COVID-19	1	Number	2020	5886.88	6294.94	5547.93
1	Deaths	44636	Low-middle SDI	3	Both	9	20-24 years	1048	COVID-19	1	Number	2020	8809.72	9383.86	8291.37
1	Deaths	44636	Low-middle SDI	3	Both	10	25-29 years	1048	COVID-19	1	Number	2020	16612.8	17720.6	15613.4
1	Deaths	44636	Low-middle SDI	3	Both	11	30-34 years	1048	COVID-19	1	Number	2020	28390.1	30307	26642.8
1	Deaths	44636	Low-middle SDI	3	Both	12	35-39 years	1048	COVID-19	1	Number	2020	39020.5	41726.1	36576.4
1	Deaths	44636	Low-middle SDI	3	Both	13	40-44 years	1048	COVID-19	1	Number	2020	56986	60946.1	53388.5
1	Deaths	44636	Low-middle SDI	3	Both	14	45-49 years	1048	COVID-19	1	Number	2020	69134.2	73970.7	64796.7
1	Deaths	44636	Low-middle SDI	3	Both	15	50-54 years	1048	COVID-19	1	Number	2020	81739.2	87496.2	76479.6
1	Deaths	44636	Low-middle SDI	3	Both	16	55-59 years	1048	COVID-19	1	Number	2020	104775	112167	97783.5
1	Deaths	44636	Low-middle SDI	3	Both	17	60-64 years	1048	COVID-19	1	Number	2020	143063	153030	133403
1	Deaths	44636	Low-middle SDI	3	Both	18	65-69 years	1048	COVID-19	1	Number	2020	175931	187975	164071
1	Deaths	44636	Low-middle SDI	3	Both	19	70-74 years	1048	COVID-19	1	Number	2020	182688	194878	171048
1	Deaths	44636	Low-middle SDI	3	Both	20	75-79 years	1048	COVID-19	1	Number	2020	162333	173323	152119
1	Deaths	44636	Low-middle SDI	3	Both	30	80-84 years	1048	COVID-19	1	Number	2020	148293	158036	139232
1	Deaths	44636	Low-middle SDI	3	Both	31	85-89 years	1048	COVID-19	1	Number	2020	93968.9	100237	88190.2
1	Deaths	44636	Low-middle SDI	3	Both	32	90-94 years	1048	COVID-19	1	Number	2020	54659.8	58202.5	51306.1
1	Deaths	44636	Low-middle SDI	3	Both	235	95+ years	1048	COVID-19	1	Number	2020	20463.1	21701.1	19176.3
1	Deaths	44637	Low SDI	1	Male	1	<5 years	1048	COVID-19	1	Number	2020	1805.56	1950.75	1695.1
1	Deaths	44637	Low SDI	1	Male	6	5-9 years	1048	COVID-19	1	Number	2020	1165.3	1323.76	877.016
1	Deaths	44637	Low SDI	1	Male	7	10-14 years	1048	COVID-19	1	Number	2020	1488.22	1664.55	1114.07
1	Deaths	44637	Low SDI	1	Male	8	15-19 years	1048	COVID-19	1	Number	2020	2430.43	2618.67	2289.16
1	Deaths	44637	Low SDI	1	Male	9	20-24 years	1048	COVID-19	1	Number	2020	3438.91	3708.62	3240.72
1	Deaths	44637	Low SDI	1	Male	10	25-29 years	1048	COVID-19	1	Number	2020	6851.81	7406.62	6451.97
1	Deaths	44637	Low SDI	1	Male	11	30-34 years	1048	COVID-19	1	Number	2020	11906.7	12845	11230.3
1	Deaths	44637	Low SDI	1	Male	12	35-39 years	1048	COVID-19	1	Number	2020	15427.5	16634.8	14558.5
1	Deaths	44637	Low SDI	1	Male	13	40-44 years	1048	COVID-19	1	Number	2020	22290	24039.5	21012.1
1	Deaths	44637	Low SDI	1	Male	14	45-49 years	1048	COVID-19	1	Number	2020	26311.8	28469.3	24724.6
1	Deaths	44637	Low SDI	1	Male	15	50-54 years	1048	COVID-19	1	Number	2020	29130.2	31416.3	27461.4
1	Deaths	44637	Low SDI	1	Male	16	55-59 years	1048	COVID-19	1	Number	2020	33933	36630.9	31834
1	Deaths	44637	Low SDI	1	Male	17	60-64 years	1048	COVID-19	1	Number	2020	42721.5	46075.4	40070.4
1	Deaths	44637	Low SDI	1	Male	18	65-69 years	1048	COVID-19	1	Number	2020	51944.8	55811.2	48991.3
1	Deaths	44637	Low SDI	1	Male	19	70-74 years	1048	COVID-19	1	Number	2020	48764.8	52158.7	46132.5
1	Deaths	44637	Low SDI	1	Male	20	75-79 years	1048	COVID-19	1	Number	2020	43521.6	46673.3	41288.3
1	Deaths	44637	Low SDI	1	Male	30	80-84 years	1048	COVID-19	1	Number	2020	35533.1	38145	33685.3
1	Deaths	44637	Low SDI	1	Male	31	85-89 years	1048	COVID-19	1	Number	2020	21331.7	22893.1	20218.4
1	Deaths	44637	Low SDI	1	Male	32	90-94 years	1048	COVID-19	1	Number	2020	10539.6	11290.2	9993.9
1	Deaths	44637	Low SDI	1	Male	235	95+ years	1048	COVID-19	1	Number	2020	2778.05	2992.17	2628.44
1	Deaths	44637	Low SDI	2	Female	1	<5 years	1048	COVID-19	1	Number	2020	1541.9	1665.55	1446.65
1	Deaths	44637	Low SDI	2	Female	6	5-9 years	1048	COVID-19	1	Number	2020	851.16	1083.48	528.966
1	Deaths	44637	Low SDI	2	Female	7	10-14 years	1048	COVID-19	1	Number	2020	952.492	1240.08	554.676
1	Deaths	44637	Low SDI	2	Female	8	15-19 years	1048	COVID-19	1	Number	2020	2428.64	2622.74	2284.29
1	Deaths	44637	Low SDI	2	Female	9	20-24 years	1048	COVID-19	1	Number	2020	2847.76	3077.48	2678.72
1	Deaths	44637	Low SDI	2	Female	10	25-29 years	1048	COVID-19	1	Number	2020	4094.03	4423.92	3853.26
1	Deaths	44637	Low SDI	2	Female	11	30-34 years	1048	COVID-19	1	Number	2020	5489.3	5919.8	5175.7
1	Deaths	44637	Low SDI	2	Female	12	35-39 years	1048	COVID-19	1	Number	2020	7552.7	8146.74	7124.88
1	Deaths	44637	Low SDI	2	Female	13	40-44 years	1048	COVID-19	1	Number	2020	10417.1	11230.2	9835.15
1	Deaths	44637	Low SDI	2	Female	14	45-49 years	1048	COVID-19	1	Number	2020	11973.8	12957.4	11257.3
1	Deaths	44637	Low SDI	2	Female	15	50-54 years	1048	COVID-19	1	Number	2020	12696.5	13716.9	11969.5
1	Deaths	44637	Low SDI	2	Female	16	55-59 years	1048	COVID-19	1	Number	2020	14969.3	16121.2	14110.4
1	Deaths	44637	Low SDI	2	Female	17	60-64 years	1048	COVID-19	1	Number	2020	19861	21404.9	18693.9
1	Deaths	44637	Low SDI	2	Female	18	65-69 years	1048	COVID-19	1	Number	2020	24506.2	26322.1	23192.9
1	Deaths	44637	Low SDI	2	Female	19	70-74 years	1048	COVID-19	1	Number	2020	24756.6	26565.9	23451.4
1	Deaths	44637	Low SDI	2	Female	20	75-79 years	1048	COVID-19	1	Number	2020	23080.6	24805.7	21861
1	Deaths	44637	Low SDI	2	Female	30	80-84 years	1048	COVID-19	1	Number	2020	21557.9	23167	20395.2
1	Deaths	44637	Low SDI	2	Female	31	85-89 years	1048	COVID-19	1	Number	2020	14696.8	15753.1	13871.8
1	Deaths	44637	Low SDI	2	Female	32	90-94 years	1048	COVID-19	1	Number	2020	8730.31	9334.98	8238.96
1	Deaths	44637	Low SDI	2	Female	235	95+ years	1048	COVID-19	1	Number	2020	3243.48	3475.86	3052.93
1	Deaths	44637	Low SDI	3	Both	1	<5 years	1048	COVID-19	1	Number	2020	3347.46	3616.34	3141.82
1	Deaths	44637	Low SDI	3	Both	6	5-9 years	1048	COVID-19	1	Number	2020	2016.46	2385.99	1436.87
1	Deaths	44637	Low SDI	3	Both	7	10-14 years	1048	COVID-19	1	Number	2020	2440.71	2873.64	1699.21
1	Deaths	44637	Low SDI	3	Both	8	15-19 years	1048	COVID-19	1	Number	2020	4859.07	5241.56	4573.44
1	Deaths	44637	Low SDI	3	Both	9	20-24 years	1048	COVID-19	1	Number	2020	6286.68	6787.99	5919.03
1	Deaths	44637	Low SDI	3	Both	10	25-29 years	1048	COVID-19	1	Number	2020	10945.8	11832.5	10308.4
1	Deaths	44637	Low SDI	3	Both	11	30-34 years	1048	COVID-19	1	Number	2020	17396	18766.7	16406.3
1	Deaths	44637	Low SDI	3	Both	12	35-39 years	1048	COVID-19	1	Number	2020	22980.2	24772.8	21689.2
1	Deaths	44637	Low SDI	3	Both	13	40-44 years	1048	COVID-19	1	Number	2020	32707.1	35273.2	30845.1
1	Deaths	44637	Low SDI	3	Both	14	45-49 years	1048	COVID-19	1	Number	2020	38285.7	41426.7	35987
1	Deaths	44637	Low SDI	3	Both	15	50-54 years	1048	COVID-19	1	Number	2020	41826.7	45117.5	39435.9
1	Deaths	44637	Low SDI	3	Both	16	55-59 years	1048	COVID-19	1	Number	2020	48902.3	52752.2	45965.2
1	Deaths	44637	Low SDI	3	Both	17	60-64 years	1048	COVID-19	1	Number	2020	62582.5	67480.3	58753.6
1	Deaths	44637	Low SDI	3	Both	18	65-69 years	1048	COVID-19	1	Number	2020	76451.1	82079.6	72196
1	Deaths	44637	Low SDI	3	Both	19	70-74 years	1048	COVID-19	1	Number	2020	73521.4	78724.7	69585.6
1	Deaths	44637	Low SDI	3	Both	20	75-79 years	1048	COVID-19	1	Number	2020	66602.2	71484.2	63166.6
1	Deaths	44637	Low SDI	3	Both	30	80-84 years	1048	COVID-19	1	Number	2020	57091	61304.7	54136.3
1	Deaths	44637	Low SDI	3	Both	31	85-89 years	1048	COVID-19	1	Number	2020	36028.5	38640.7	34165.7
1	Deaths	44637	Low SDI	3	Both	32	90-94 years	1048	COVID-19	1	Number	2020	19269.9	20621.6	18234.2
1	Deaths	44637	Low SDI	3	Both	235	95+ years	1048	COVID-19	1	Number	2020	6021.52	6459.69	5680.03
1	Deaths	44639	Middle SDI	1	Male	1	<5 years	1048	COVID-19	1	Number	2020	1274.87	1460.62	1114.58
1	Deaths	44639	Middle SDI	1	Male	6	5-9 years	1048	COVID-19	1	Number	2020	1201.63	1396.93	1039.34
1	Deaths	44639	Middle SDI	1	Male	7	10-14 years	1048	COVID-19	1	Number	2020	1258.92	1469.88	1079.13
1	Deaths	44639	Middle SDI	1	Male	8	15-19 years	1048	COVID-19	1	Number	2020	1789.47	2214.44	1479.59
1	Deaths	44639	Middle SDI	1	Male	9	20-24 years	1048	COVID-19	1	Number	2020	2896.9	3486.43	2431.76
1	Deaths	44639	Middle SDI	1	Male	10	25-29 years	1048	COVID-19	1	Number	2020	7086.45	7930.26	6359.89
1	Deaths	44639	Middle SDI	1	Male	11	30-34 years	1048	COVID-19	1	Number	2020	13738.7	15114.7	12483.7
1	Deaths	44639	Middle SDI	1	Male	12	35-39 years	1048	COVID-19	1	Number	2020	19665.4	21641.9	17853.2
1	Deaths	44639	Middle SDI	1	Male	13	40-44 years	1048	COVID-19	1	Number	2020	30531.2	33712.3	27702.2
1	Deaths	44639	Middle SDI	1	Male	14	45-49 years	1048	COVID-19	1	Number	2020	41217.6	45559.9	37192.4
1	Deaths	44639	Middle SDI	1	Male	15	50-54 years	1048	COVID-19	1	Number	2020	52473.1	58636.1	47232.3
1	Deaths	44639	Middle SDI	1	Male	16	55-59 years	1048	COVID-19	1	Number	2020	69686.6	77853.8	63025.1
1	Deaths	44639	Middle SDI	1	Male	17	60-64 years	1048	COVID-19	1	Number	2020	90885.5	101120	82815.6
1	Deaths	44639	Middle SDI	1	Male	18	65-69 years	1048	COVID-19	1	Number	2020	103980	116565	94786.8
1	Deaths	44639	Middle SDI	1	Male	19	70-74 years	1048	COVID-19	1	Number	2020	98003.2	109624	89426.5
1	Deaths	44639	Middle SDI	1	Male	20	75-79 years	1048	COVID-19	1	Number	2020	85414.9	95540.9	77765.2
1	Deaths	44639	Middle SDI	1	Male	30	80-84 years	1048	COVID-19	1	Number	2020	78997.5	87913.5	72283.1
1	Deaths	44639	Middle SDI	1	Male	31	85-89 years	1048	COVID-19	1	Number	2020	53688.1	59561.3	49482.8
1	Deaths	44639	Middle SDI	1	Male	32	90-94 years	1048	COVID-19	1	Number	2020	29540.9	32349	27087.2
1	Deaths	44639	Middle SDI	1	Male	235	95+ years	1048	COVID-19	1	Number	2020	12596.1	13774.3	11501.5
1	Deaths	44639	Middle SDI	2	Female	1	<5 years	1048	COVID-19	1	Number	2020	1079.32	1217.91	960.081
1	Deaths	44639	Middle SDI	2	Female	6	5-9 years	1048	COVID-19	1	Number	2020	927.278	1078.16	793.45
1	Deaths	44639	Middle SDI	2	Female	7	10-14 years	1048	COVID-19	1	Number	2020	1060.74	1240.29	922.66
1	Deaths	44639	Middle SDI	2	Female	8	15-19 years	1048	COVID-19	1	Number	2020	1631.3	1826.85	1469.45
1	Deaths	44639	Middle SDI	2	Female	9	20-24 years	1048	COVID-19	1	Number	2020	2269.49	2603.13	1993.08
1	Deaths	44639	Middle SDI	2	Female	10	25-29 years	1048	COVID-19	1	Number	2020	3900.8	4429.16	3438.91
1	Deaths	44639	Middle SDI	2	Female	11	30-34 years	1048	COVID-19	1	Number	2020	5969.17	6725.19	5341.98
1	Deaths	44639	Middle SDI	2	Female	12	35-39 years	1048	COVID-19	1	Number	2020	9149.12	10249.4	8302.17
1	Deaths	44639	Middle SDI	2	Female	13	40-44 years	1048	COVID-19	1	Number	2020	14156.6	15825.4	12851.2
1	Deaths	44639	Middle SDI	2	Female	14	45-49 years	1048	COVID-19	1	Number	2020	18829.1	21154.2	16957.3
1	Deaths	44639	Middle SDI	2	Female	15	50-54 years	1048	COVID-19	1	Number	2020	24086.8	27082.9	21661.1
1	Deaths	44639	Middle SDI	2	Female	16	55-59 years	1048	COVID-19	1	Number	2020	33587.9	37519.3	30348
1	Deaths	44639	Middle SDI	2	Female	17	60-64 years	1048	COVID-19	1	Number	2020	46160.8	51333.7	41979.2
1	Deaths	44639	Middle SDI	2	Female	18	65-69 years	1048	COVID-19	1	Number	2020	54196.2	60829.1	49509.5
1	Deaths	44639	Middle SDI	2	Female	19	70-74 years	1048	COVID-19	1	Number	2020	56557.3	63586.4	51928.9
1	Deaths	44639	Middle SDI	2	Female	20	75-79 years	1048	COVID-19	1	Number	2020	50400.6	57349.6	45827.6
1	Deaths	44639	Middle SDI	2	Female	30	80-84 years	1048	COVID-19	1	Number	2020	54096.7	61123	49596.9
1	Deaths	44639	Middle SDI	2	Female	31	85-89 years	1048	COVID-19	1	Number	2020	46096.4	52099.4	41852.4
1	Deaths	44639	Middle SDI	2	Female	32	90-94 years	1048	COVID-19	1	Number	2020	28638.2	32175.5	26097.5
1	Deaths	44639	Middle SDI	2	Female	235	95+ years	1048	COVID-19	1	Number	2020	11258.5	12552.6	10223.8
1	Deaths	44639	Middle SDI	3	Both	1	<5 years	1048	COVID-19	1	Number	2020	2354.19	2667.41	2096.92
1	Deaths	44639	Middle SDI	3	Both	6	5-9 years	1048	COVID-19	1	Number	2020	2128.91	2459.51	1838.56
1	Deaths	44639	Middle SDI	3	Both	7	10-14 years	1048	COVID-19	1	Number	2020	2319.66	2689.4	2025.01
1	Deaths	44639	Middle SDI	3	Both	8	15-19 years	1048	COVID-19	1	Number	2020	3420.77	3950.2	3007.22
1	Deaths	44639	Middle SDI	3	Both	9	20-24 years	1048	COVID-19	1	Number	2020	5166.38	5910.97	4535.03
1	Deaths	44639	Middle SDI	3	Both	10	25-29 years	1048	COVID-19	1	Number	2020	10987.2	12183.4	9981.81
1	Deaths	44639	Middle SDI	3	Both	11	30-34 years	1048	COVID-19	1	Number	2020	19707.9	21657.2	18063
1	Deaths	44639	Middle SDI	3	Both	12	35-39 years	1048	COVID-19	1	Number	2020	28814.5	31634	26453.8
1	Deaths	44639	Middle SDI	3	Both	13	40-44 years	1048	COVID-19	1	Number	2020	44687.8	49044.7	41054.8
1	Deaths	44639	Middle SDI	3	Both	14	45-49 years	1048	COVID-19	1	Number	2020	60046.7	66300.4	55017
1	Deaths	44639	Middle SDI	3	Both	15	50-54 years	1048	COVID-19	1	Number	2020	76559.9	85144	69910.9
1	Deaths	44639	Middle SDI	3	Both	16	55-59 years	1048	COVID-19	1	Number	2020	103275	114852	94648.6
1	Deaths	44639	Middle SDI	3	Both	17	60-64 years	1048	COVID-19	1	Number	2020	137046	152023	126151
1	Deaths	44639	Middle SDI	3	Both	18	65-69 years	1048	COVID-19	1	Number	2020	158176	175643	145601
1	Deaths	44639	Middle SDI	3	Both	19	70-74 years	1048	COVID-19	1	Number	2020	154560	170410	142803
1	Deaths	44639	Middle SDI	3	Both	20	75-79 years	1048	COVID-19	1	Number	2020	135815	150182	125342
1	Deaths	44639	Middle SDI	3	Both	30	80-84 years	1048	COVID-19	1	Number	2020	133094	146610	122971
1	Deaths	44639	Middle SDI	3	Both	31	85-89 years	1048	COVID-19	1	Number	2020	99784.5	110308	91983.8
1	Deaths	44639	Middle SDI	3	Both	32	90-94 years	1048	COVID-19	1	Number	2020	58179.1	64466.3	53563.3
1	Deaths	44639	Middle SDI	3	Both	235	95+ years	1048	COVID-19	1	Number	2020	23854.6	26177.9	21888.8
1	Deaths	1	Global	1	Male	1	<5 years	1048	COVID-19	1	Number	2021	9047.85	9872.79	8424.23
1	Deaths	1	Global	1	Male	6	5-9 years	1048	COVID-19	1	Number	2021	6734.39	7801.16	5268.48
1	Deaths	1	Global	1	Male	7	10-14 years	1048	COVID-19	1	Number	2021	8749.82	10087.1	6570.12
1	Deaths	1	Global	1	Male	8	15-19 years	1048	COVID-19	1	Number	2021	14303.7	15247	13427.2
1	Deaths	1	Global	1	Male	9	20-24 years	1048	COVID-19	1	Number	2021	23687.3	25228.4	22287.3
1	Deaths	1	Global	1	Male	10	25-29 years	1048	COVID-19	1	Number	2021	50349.3	53613	47566.8
1	Deaths	1	Global	1	Male	11	30-34 years	1048	COVID-19	1	Number	2021	95614.8	101937	90654
1	Deaths	1	Global	1	Male	12	35-39 years	1048	COVID-19	1	Number	2021	132857	141880	125918
1	Deaths	1	Global	1	Male	13	40-44 years	1048	COVID-19	1	Number	2021	195509	209575	185239
1	Deaths	1	Global	1	Male	14	45-49 years	1048	COVID-19	1	Number	2021	241694	259827	228391
1	Deaths	1	Global	1	Male	15	50-54 years	1048	COVID-19	1	Number	2021	291604	314598	275071
1	Deaths	1	Global	1	Male	16	55-59 years	1048	COVID-19	1	Number	2021	380867	411691	358411
1	Deaths	1	Global	1	Male	17	60-64 years	1048	COVID-19	1	Number	2021	508470	548997	478823
1	Deaths	1	Global	1	Male	18	65-69 years	1048	COVID-19	1	Number	2021	620665	667656	586196
1	Deaths	1	Global	1	Male	19	70-74 years	1048	COVID-19	1	Number	2021	617723	658942	586460
1	Deaths	1	Global	1	Male	20	75-79 years	1048	COVID-19	1	Number	2021	527629	560594	502556
1	Deaths	1	Global	1	Male	30	80-84 years	1048	COVID-19	1	Number	2021	487245	515170	464886
1	Deaths	1	Global	1	Male	31	85-89 years	1048	COVID-19	1	Number	2021	330250	348156	315751
1	Deaths	1	Global	1	Male	32	90-94 years	1048	COVID-19	1	Number	2021	190670	200845	182878
1	Deaths	1	Global	1	Male	235	95+ years	1048	COVID-19	1	Number	2021	70558.6	74674.3	67383.5
1	Deaths	1	Global	2	Female	1	<5 years	1048	COVID-19	1	Number	2021	7667.36	8343.95	7117.64
1	Deaths	1	Global	2	Female	6	5-9 years	1048	COVID-19	1	Number	2021	4657.89	5846.11	3411.11
1	Deaths	1	Global	2	Female	7	10-14 years	1048	COVID-19	1	Number	2021	5654.99	7064.28	3924.83
1	Deaths	1	Global	2	Female	8	15-19 years	1048	COVID-19	1	Number	2021	12546.1	13368.8	11814.3
1	Deaths	1	Global	2	Female	9	20-24 years	1048	COVID-19	1	Number	2021	17051.4	18191.9	16086
1	Deaths	1	Global	2	Female	10	25-29 years	1048	COVID-19	1	Number	2021	28140.9	30006.7	26553.2
1	Deaths	1	Global	2	Female	11	30-34 years	1048	COVID-19	1	Number	2021	42354.3	45135.8	39961.7
1	Deaths	1	Global	2	Female	12	35-39 years	1048	COVID-19	1	Number	2021	62510.5	66714.6	58879.3
1	Deaths	1	Global	2	Female	13	40-44 years	1048	COVID-19	1	Number	2021	91570	98070.9	86306.6
1	Deaths	1	Global	2	Female	14	45-49 years	1048	COVID-19	1	Number	2021	113669	122064	106850
1	Deaths	1	Global	2	Female	15	50-54 years	1048	COVID-19	1	Number	2021	135149	145958	126919
1	Deaths	1	Global	2	Female	16	55-59 years	1048	COVID-19	1	Number	2021	183600	198102	172705
1	Deaths	1	Global	2	Female	17	60-64 years	1048	COVID-19	1	Number	2021	266354	286341	250783
1	Deaths	1	Global	2	Female	18	65-69 years	1048	COVID-19	1	Number	2021	336825	360172	317539
1	Deaths	1	Global	2	Female	19	70-74 years	1048	COVID-19	1	Number	2021	372096	395463	351558
1	Deaths	1	Global	2	Female	20	75-79 years	1048	COVID-19	1	Number	2021	334103	355362	316657
1	Deaths	1	Global	2	Female	30	80-84 years	1048	COVID-19	1	Number	2021	401506	424506	380893
1	Deaths	1	Global	2	Female	31	85-89 years	1048	COVID-19	1	Number	2021	328573	347217	311810
1	Deaths	1	Global	2	Female	32	90-94 years	1048	COVID-19	1	Number	2021	235481	247680	224670
1	Deaths	1	Global	2	Female	235	95+ years	1048	COVID-19	1	Number	2021	103815	109622	98995.1
1	Deaths	1	Global	3	Both	1	<5 years	1048	COVID-19	1	Number	2021	16715.2	18212	15535.9
1	Deaths	1	Global	3	Both	6	5-9 years	1048	COVID-19	1	Number	2021	11392.3	13573.8	8753.83
1	Deaths	1	Global	3	Both	7	10-14 years	1048	COVID-19	1	Number	2021	14404.8	16836.3	10682.1
1	Deaths	1	Global	3	Both	8	15-19 years	1048	COVID-19	1	Number	2021	26849.7	28537.8	25322.1
1	Deaths	1	Global	3	Both	9	20-24 years	1048	COVID-19	1	Number	2021	40738.7	43287.9	38452.3
1	Deaths	1	Global	3	Both	10	25-29 years	1048	COVID-19	1	Number	2021	78490.2	83566.9	74275
1	Deaths	1	Global	3	Both	11	30-34 years	1048	COVID-19	1	Number	2021	137969	147235	130868
1	Deaths	1	Global	3	Both	12	35-39 years	1048	COVID-19	1	Number	2021	195367	208751	185514
1	Deaths	1	Global	3	Both	13	40-44 years	1048	COVID-19	1	Number	2021	287079	307954	272441
1	Deaths	1	Global	3	Both	14	45-49 years	1048	COVID-19	1	Number	2021	355363	382260	336798
1	Deaths	1	Global	3	Both	15	50-54 years	1048	COVID-19	1	Number	2021	426753	459681	403680
1	Deaths	1	Global	3	Both	16	55-59 years	1048	COVID-19	1	Number	2021	564467	608515	533981
1	Deaths	1	Global	3	Both	17	60-64 years	1048	COVID-19	1	Number	2021	774824	833537	733356
1	Deaths	1	Global	3	Both	18	65-69 years	1048	COVID-19	1	Number	2021	957490	1.02665e+06	908928
1	Deaths	1	Global	3	Both	19	70-74 years	1048	COVID-19	1	Number	2021	989820	1.05304e+06	942493
1	Deaths	1	Global	3	Both	20	75-79 years	1048	COVID-19	1	Number	2021	861732	915110	821103
1	Deaths	1	Global	3	Both	30	80-84 years	1048	COVID-19	1	Number	2021	888751	939021	849246
1	Deaths	1	Global	3	Both	31	85-89 years	1048	COVID-19	1	Number	2021	658823	693729	629692
1	Deaths	1	Global	3	Both	32	90-94 years	1048	COVID-19	1	Number	2021	426151	448326	408300
1	Deaths	1	Global	3	Both	235	95+ years	1048	COVID-19	1	Number	2021	174374	183809	166599
1	Deaths	44634	High-middle SDI	1	Male	1	<5 years	1048	COVID-19	1	Number	2021	468.203	520.35	417.866
1	Deaths	44634	High-middle SDI	1	Male	6	5-9 years	1048	COVID-19	1	Number	2021	361.252	415.439	306.085
1	Deaths	44634	High-middle SDI	1	Male	7	10-14 years	1048	COVID-19	1	Number	2021	466.065	529.267	405.42
1	Deaths	44634	High-middle SDI	1	Male	8	15-19 years	1048	COVID-19	1	Number	2021	751.393	893.478	646.247
1	Deaths	44634	High-middle SDI	1	Male	9	20-24 years	1048	COVID-19	1	Number	2021	1252.64	1463.28	1098.31
1	Deaths	44634	High-middle SDI	1	Male	10	25-29 years	1048	COVID-19	1	Number	2021	3186.57	3546.72	2880.02
1	Deaths	44634	High-middle SDI	1	Male	11	30-34 years	1048	COVID-19	1	Number	2021	8112.05	9037.58	7279.35
1	Deaths	44634	High-middle SDI	1	Male	12	35-39 years	1048	COVID-19	1	Number	2021	12822.1	14486.6	11274.5
1	Deaths	44634	High-middle SDI	1	Male	13	40-44 years	1048	COVID-19	1	Number	2021	21579.4	24307.1	19002.6
1	Deaths	44634	High-middle SDI	1	Male	14	45-49 years	1048	COVID-19	1	Number	2021	28270.5	32000.4	24771.2
1	Deaths	44634	High-middle SDI	1	Male	15	50-54 years	1048	COVID-19	1	Number	2021	35025.9	39683.2	30666
1	Deaths	44634	High-middle SDI	1	Male	16	55-59 years	1048	COVID-19	1	Number	2021	53509	60813.7	46734.1
1	Deaths	44634	High-middle SDI	1	Male	17	60-64 years	1048	COVID-19	1	Number	2021	80092.1	90750.5	70383.1
1	Deaths	44634	High-middle SDI	1	Male	18	65-69 years	1048	COVID-19	1	Number	2021	104225	116196	93062.2
1	Deaths	44634	High-middle SDI	1	Male	19	70-74 years	1048	COVID-19	1	Number	2021	106560	117359	95646.8
1	Deaths	44634	High-middle SDI	1	Male	20	75-79 years	1048	COVID-19	1	Number	2021	75853.9	81888.6	69515.2
1	Deaths	44634	High-middle SDI	1	Male	30	80-84 years	1048	COVID-19	1	Number	2021	95971.8	103148	88619.8
1	Deaths	44634	High-middle SDI	1	Male	31	85-89 years	1048	COVID-19	1	Number	2021	62928.4	66853.8	58649.9
1	Deaths	44634	High-middle SDI	1	Male	32	90-94 years	1048	COVID-19	1	Number	2021	32114.2	34163.6	29835.8
1	Deaths	44634	High-middle SDI	1	Male	235	95+ years	1048	COVID-19	1	Number	2021	10147	10901.7	9296.09
1	Deaths	44634	High-middle SDI	2	Female	1	<5 years	1048	COVID-19	1	Number	2021	394.163	436.028	363.149
1	Deaths	44634	High-middle SDI	2	Female	6	5-9 years	1048	COVID-19	1	Number	2021	293.891	334.949	255.821
1	Deaths	44634	High-middle SDI	2	Female	7	10-14 years	1048	COVID-19	1	Number	2021	411.71	459.78	358.98
1	Deaths	44634	High-middle SDI	2	Female	8	15-19 years	1048	COVID-19	1	Number	2021	689.624	754.06	626.18
1	Deaths	44634	High-middle SDI	2	Female	9	20-24 years	1048	COVID-19	1	Number	2021	984.052	1104.67	872.089
1	Deaths	44634	High-middle SDI	2	Female	10	25-29 years	1048	COVID-19	1	Number	2021	1790.29	2032.55	1557.61
1	Deaths	44634	High-middle SDI	2	Female	11	30-34 years	1048	COVID-19	1	Number	2021	3744.64	4326.03	3208.46
1	Deaths	44634	High-middle SDI	2	Female	12	35-39 years	1048	COVID-19	1	Number	2021	6054.9	7040.82	5182.67
1	Deaths	44634	High-middle SDI	2	Female	13	40-44 years	1048	COVID-19	1	Number	2021	10013.9	11416.3	8716.08
1	Deaths	44634	High-middle SDI	2	Female	14	45-49 years	1048	COVID-19	1	Number	2021	13687.3	15481	11996.9
1	Deaths	44634	High-middle SDI	2	Female	15	50-54 years	1048	COVID-19	1	Number	2021	17638.3	19818	15576.6
1	Deaths	44634	High-middle SDI	2	Female	16	55-59 years	1048	COVID-19	1	Number	2021	28777.8	32478.2	25309.1
1	Deaths	44634	High-middle SDI	2	Female	17	60-64 years	1048	COVID-19	1	Number	2021	50495	56339.3	44960.8
1	Deaths	44634	High-middle SDI	2	Female	18	65-69 years	1048	COVID-19	1	Number	2021	70674.7	78050.6	63464
1	Deaths	44634	High-middle SDI	2	Female	19	70-74 years	1048	COVID-19	1	Number	2021	85044.9	93743	76548.5
1	Deaths	44634	High-middle SDI	2	Female	20	75-79 years	1048	COVID-19	1	Number	2021	65887.1	71880.2	59734.2
1	Deaths	44634	High-middle SDI	2	Female	30	80-84 years	1048	COVID-19	1	Number	2021	118085	129553	107524
1	Deaths	44634	High-middle SDI	2	Female	31	85-89 years	1048	COVID-19	1	Number	2021	87622	95962.3	79660.2
1	Deaths	44634	High-middle SDI	2	Female	32	90-94 years	1048	COVID-19	1	Number	2021	61365.4	66302.8	56474.4
1	Deaths	44634	High-middle SDI	2	Female	235	95+ years	1048	COVID-19	1	Number	2021	23146.3	25043.1	21194
1	Deaths	44634	High-middle SDI	3	Both	1	<5 years	1048	COVID-19	1	Number	2021	862.366	952.657	785.501
1	Deaths	44634	High-middle SDI	3	Both	6	5-9 years	1048	COVID-19	1	Number	2021	655.143	745.506	565.828
1	Deaths	44634	High-middle SDI	3	Both	7	10-14 years	1048	COVID-19	1	Number	2021	877.775	977.932	772.602
1	Deaths	44634	High-middle SDI	3	Both	8	15-19 years	1048	COVID-19	1	Number	2021	1441.02	1605.68	1301.09
1	Deaths	44634	High-middle SDI	3	Both	9	20-24 years	1048	COVID-19	1	Number	2021	2236.69	2489.42	2013.59
1	Deaths	44634	High-middle SDI	3	Both	10	25-29 years	1048	COVID-19	1	Number	2021	4976.86	5427.2	4532.03
1	Deaths	44634	High-middle SDI	3	Both	11	30-34 years	1048	COVID-19	1	Number	2021	11856.7	12928.6	10816.4
1	Deaths	44634	High-middle SDI	3	Both	12	35-39 years	1048	COVID-19	1	Number	2021	18877	20881.2	16957.1
1	Deaths	44634	High-middle SDI	3	Both	13	40-44 years	1048	COVID-19	1	Number	2021	31593.3	34716	28461.7
1	Deaths	44634	High-middle SDI	3	Both	14	45-49 years	1048	COVID-19	1	Number	2021	41957.7	46207.6	37762.2
1	Deaths	44634	High-middle SDI	3	Both	15	50-54 years	1048	COVID-19	1	Number	2021	52664.2	57857.5	47500.1
1	Deaths	44634	High-middle SDI	3	Both	16	55-59 years	1048	COVID-19	1	Number	2021	82286.8	90400.7	74300.6
1	Deaths	44634	High-middle SDI	3	Both	17	60-64 years	1048	COVID-19	1	Number	2021	130587	142603	118490
1	Deaths	44634	High-middle SDI	3	Both	18	65-69 years	1048	COVID-19	1	Number	2021	174899	188966	159838
1	Deaths	44634	High-middle SDI	3	Both	19	70-74 years	1048	COVID-19	1	Number	2021	191605	206820	175610
1	Deaths	44634	High-middle SDI	3	Both	20	75-79 years	1048	COVID-19	1	Number	2021	141741	151722	130221
1	Deaths	44634	High-middle SDI	3	Both	30	80-84 years	1048	COVID-19	1	Number	2021	214056	228223	199265
1	Deaths	44634	High-middle SDI	3	Both	31	85-89 years	1048	COVID-19	1	Number	2021	150550	160404	139383
1	Deaths	44634	High-middle SDI	3	Both	32	90-94 years	1048	COVID-19	1	Number	2021	93479.6	99385.9	87263.1
1	Deaths	44634	High-middle SDI	3	Both	235	95+ years	1048	COVID-19	1	Number	2021	33293.2	35735.4	30560.1
1	Deaths	44635	High SDI	1	Male	1	<5 years	1048	COVID-19	1	Number	2021	109.163	117.081	102.866
1	Deaths	44635	High SDI	1	Male	6	5-9 years	1048	COVID-19	1	Number	2021	58.8472	75.2149	41.0976
1	Deaths	44635	High SDI	1	Male	7	10-14 years	1048	COVID-19	1	Number	2021	129.614	139.269	121.174
1	Deaths	44635	High SDI	1	Male	8	15-19 years	1048	COVID-19	1	Number	2021	1882.49	1926.87	1840.65
1	Deaths	44635	High SDI	1	Male	9	20-24 years	1048	COVID-19	1	Number	2021	3520.89	3605.24	3447.58
1	Deaths	44635	High SDI	1	Male	10	25-29 years	1048	COVID-19	1	Number	2021	5245.37	5372.06	5129.47
1	Deaths	44635	High SDI	1	Male	11	30-34 years	1048	COVID-19	1	Number	2021	8364.58	8595.53	8119.1
1	Deaths	44635	High SDI	1	Male	12	35-39 years	1048	COVID-19	1	Number	2021	10599.6	10999.4	10184
1	Deaths	44635	High SDI	1	Male	13	40-44 years	1048	COVID-19	1	Number	2021	13425.6	14066.8	12819.3
1	Deaths	44635	High SDI	1	Male	14	45-49 years	1048	COVID-19	1	Number	2021	16733.8	17595.1	15934.9
1	Deaths	44635	High SDI	1	Male	15	50-54 years	1048	COVID-19	1	Number	2021	22327	23414.9	21337
1	Deaths	44635	High SDI	1	Male	16	55-59 years	1048	COVID-19	1	Number	2021	31768.5	33280.3	30392.4
1	Deaths	44635	High SDI	1	Male	17	60-64 years	1048	COVID-19	1	Number	2021	46933.6	49320.2	44759.8
1	Deaths	44635	High SDI	1	Male	18	65-69 years	1048	COVID-19	1	Number	2021	60760.3	64328.2	57630.1
1	Deaths	44635	High SDI	1	Male	19	70-74 years	1048	COVID-19	1	Number	2021	70800.9	74464.6	67545.3
1	Deaths	44635	High SDI	1	Male	20	75-79 years	1048	COVID-19	1	Number	2021	72064.5	75072.5	69389.7
1	Deaths	44635	High SDI	1	Male	30	80-84 years	1048	COVID-19	1	Number	2021	71296.9	74094.6	68814.3
1	Deaths	44635	High SDI	1	Male	31	85-89 years	1048	COVID-19	1	Number	2021	60416.3	62478.5	58521.8
1	Deaths	44635	High SDI	1	Male	32	90-94 years	1048	COVID-19	1	Number	2021	41151.2	42489.4	39991.6
1	Deaths	44635	High SDI	1	Male	235	95+ years	1048	COVID-19	1	Number	2021	16289.8	16856.2	15772.1
1	Deaths	44635	High SDI	2	Female	1	<5 years	1048	COVID-19	1	Number	2021	91.2277	97.9966	85.3693
1	Deaths	44635	High SDI	2	Female	6	5-9 years	1048	COVID-19	1	Number	2021	50.0436	67.9205	38.6803
1	Deaths	44635	High SDI	2	Female	7	10-14 years	1048	COVID-19	1	Number	2021	120.572	131.353	109.703
1	Deaths	44635	High SDI	2	Female	8	15-19 years	1048	COVID-19	1	Number	2021	624.315	640.403	608.068
1	Deaths	44635	High SDI	2	Female	9	20-24 years	1048	COVID-19	1	Number	2021	1172.56	1205.18	1140.8
1	Deaths	44635	High SDI	2	Female	10	25-29 years	1048	COVID-19	1	Number	2021	2177.64	2238.62	2118.35
1	Deaths	44635	High SDI	2	Female	11	30-34 years	1048	COVID-19	1	Number	2021	3069.87	3170.94	2975.13
1	Deaths	44635	High SDI	2	Female	12	35-39 years	1048	COVID-19	1	Number	2021	4088.7	4244.96	3938.35
1	Deaths	44635	High SDI	2	Female	13	40-44 years	1048	COVID-19	1	Number	2021	5757.86	5996.19	5533.14
1	Deaths	44635	High SDI	2	Female	14	45-49 years	1048	COVID-19	1	Number	2021	7204.24	7546.3	6909.11
1	Deaths	44635	High SDI	2	Female	15	50-54 years	1048	COVID-19	1	Number	2021	9936.53	10356.2	9572.77
1	Deaths	44635	High SDI	2	Female	16	55-59 years	1048	COVID-19	1	Number	2021	14681.2	15331.6	14129.7
1	Deaths	44635	High SDI	2	Female	17	60-64 years	1048	COVID-19	1	Number	2021	23900.7	25118.4	22879
1	Deaths	44635	High SDI	2	Female	18	65-69 years	1048	COVID-19	1	Number	2021	33689.2	35528.9	32179.1
1	Deaths	44635	High SDI	2	Female	19	70-74 years	1048	COVID-19	1	Number	2021	42099.3	44318.4	40242.2
1	Deaths	44635	High SDI	2	Female	20	75-79 years	1048	COVID-19	1	Number	2021	48698.5	50688.7	46892
1	Deaths	44635	High SDI	2	Female	30	80-84 years	1048	COVID-19	1	Number	2021	58265	60816.8	56041.4
1	Deaths	44635	High SDI	2	Female	31	85-89 years	1048	COVID-19	1	Number	2021	67637.9	70680	65086.4
1	Deaths	44635	High SDI	2	Female	32	90-94 years	1048	COVID-19	1	Number	2021	63779.8	65756.8	61908.5
1	Deaths	44635	High SDI	2	Female	235	95+ years	1048	COVID-19	1	Number	2021	36542.6	37811	35356.8
1	Deaths	44635	High SDI	3	Both	1	<5 years	1048	COVID-19	1	Number	2021	200.39	214.678	189.121
1	Deaths	44635	High SDI	3	Both	6	5-9 years	1048	COVID-19	1	Number	2021	108.891	139.303	82.6548
1	Deaths	44635	High SDI	3	Both	7	10-14 years	1048	COVID-19	1	Number	2021	250.186	270.582	235.772
1	Deaths	44635	High SDI	3	Both	8	15-19 years	1048	COVID-19	1	Number	2021	2506.8	2560.44	2452.34
1	Deaths	44635	High SDI	3	Both	9	20-24 years	1048	COVID-19	1	Number	2021	4693.45	4804.51	4590.22
1	Deaths	44635	High SDI	3	Both	10	25-29 years	1048	COVID-19	1	Number	2021	7423.02	7594.98	7250.3
1	Deaths	44635	High SDI	3	Both	11	30-34 years	1048	COVID-19	1	Number	2021	11434.5	11753.1	11123.7
1	Deaths	44635	High SDI	3	Both	12	35-39 years	1048	COVID-19	1	Number	2021	14688.3	15210.1	14140.1
1	Deaths	44635	High SDI	3	Both	13	40-44 years	1048	COVID-19	1	Number	2021	19183.5	19970.3	18383
1	Deaths	44635	High SDI	3	Both	14	45-49 years	1048	COVID-19	1	Number	2021	23938	25037.5	22909.5
1	Deaths	44635	High SDI	3	Both	15	50-54 years	1048	COVID-19	1	Number	2021	32263.6	33646.9	31090.7
1	Deaths	44635	High SDI	3	Both	16	55-59 years	1048	COVID-19	1	Number	2021	46449.7	48534.2	44782.5
1	Deaths	44635	High SDI	3	Both	17	60-64 years	1048	COVID-19	1	Number	2021	70834.3	74118.9	68114.4
1	Deaths	44635	High SDI	3	Both	18	65-69 years	1048	COVID-19	1	Number	2021	94449.5	99173.9	90338.7
1	Deaths	44635	High SDI	3	Both	19	70-74 years	1048	COVID-19	1	Number	2021	112900	118097	108218
1	Deaths	44635	High SDI	3	Both	20	75-79 years	1048	COVID-19	1	Number	2021	120763	125053	116780
1	Deaths	44635	High SDI	3	Both	30	80-84 years	1048	COVID-19	1	Number	2021	129562	134254	125271
1	Deaths	44635	High SDI	3	Both	31	85-89 years	1048	COVID-19	1	Number	2021	128054	132174	123960
1	Deaths	44635	High SDI	3	Both	32	90-94 years	1048	COVID-19	1	Number	2021	104931	107949	102018
1	Deaths	44635	High SDI	3	Both	235	95+ years	1048	COVID-19	1	Number	2021	52832.4	54520.9	51198.6
1	Deaths	44636	Low-middle SDI	1	Male	1	<5 years	1048	COVID-19	1	Number	2021	3247.45	3584.42	3005.44
1	Deaths	44636	Low-middle SDI	1	Male	6	5-9 years	1048	COVID-19	1	Number	2021	2507.74	2975.48	1824.75
1	Deaths	44636	Low-middle SDI	1	Male	7	10-14 years	1048	COVID-19	1	Number	2021	3346.49	3930.19	2370.08
1	Deaths	44636	Low-middle SDI	1	Male	8	15-19 years	1048	COVID-19	1	Number	2021	4802.75	5160.09	4512.05
1	Deaths	44636	Low-middle SDI	1	Male	9	20-24 years	1048	COVID-19	1	Number	2021	8029.94	8613.06	7575.34
1	Deaths	44636	Low-middle SDI	1	Male	10	25-29 years	1048	COVID-19	1	Number	2021	17231.2	18531.7	16236
1	Deaths	44636	Low-middle SDI	1	Male	11	30-34 years	1048	COVID-19	1	Number	2021	31665.3	34140.3	29781.4
1	Deaths	44636	Low-middle SDI	1	Male	12	35-39 years	1048	COVID-19	1	Number	2021	42970.5	46398.1	40377.4
1	Deaths	44636	Low-middle SDI	1	Male	13	40-44 years	1048	COVID-19	1	Number	2021	63084.4	68258.6	59220.4
1	Deaths	44636	Low-middle SDI	1	Male	14	45-49 years	1048	COVID-19	1	Number	2021	75824	82020.4	71095.9
1	Deaths	44636	Low-middle SDI	1	Male	15	50-54 years	1048	COVID-19	1	Number	2021	90218.3	97984.7	84297.7
1	Deaths	44636	Low-middle SDI	1	Male	16	55-59 years	1048	COVID-19	1	Number	2021	113768	123992	106237
1	Deaths	44636	Low-middle SDI	1	Male	17	60-64 years	1048	COVID-19	1	Number	2021	150784	164364	140958
1	Deaths	44636	Low-middle SDI	1	Male	18	65-69 years	1048	COVID-19	1	Number	2021	186114	201658	174323
1	Deaths	44636	Low-middle SDI	1	Male	19	70-74 years	1048	COVID-19	1	Number	2021	187447	201065	176843
1	Deaths	44636	Low-middle SDI	1	Male	20	75-79 years	1048	COVID-19	1	Number	2021	161380	172569	152602
1	Deaths	44636	Low-middle SDI	1	Male	30	80-84 years	1048	COVID-19	1	Number	2021	133158	142319	125740
1	Deaths	44636	Low-middle SDI	1	Male	31	85-89 years	1048	COVID-19	1	Number	2021	79878.2	85463.1	75145.4
1	Deaths	44636	Low-middle SDI	1	Male	32	90-94 years	1048	COVID-19	1	Number	2021	45113.8	48169.1	42511
1	Deaths	44636	Low-middle SDI	1	Male	235	95+ years	1048	COVID-19	1	Number	2021	14644.5	15797.8	13697.4
1	Deaths	44636	Low-middle SDI	2	Female	1	<5 years	1048	COVID-19	1	Number	2021	2740.5	3024.13	2507.83
1	Deaths	44636	Low-middle SDI	2	Female	6	5-9 years	1048	COVID-19	1	Number	2021	1614.92	2147.19	1042.56
1	Deaths	44636	Low-middle SDI	2	Female	7	10-14 years	1048	COVID-19	1	Number	2021	1939.12	2544.23	1176.59
1	Deaths	44636	Low-middle SDI	2	Female	8	15-19 years	1048	COVID-19	1	Number	2021	4510.79	4864.02	4210.14
1	Deaths	44636	Low-middle SDI	2	Female	9	20-24 years	1048	COVID-19	1	Number	2021	5963.04	6424.41	5566.07
1	Deaths	44636	Low-middle SDI	2	Female	10	25-29 years	1048	COVID-19	1	Number	2021	9386.99	10136.5	8788.24
1	Deaths	44636	Low-middle SDI	2	Female	11	30-34 years	1048	COVID-19	1	Number	2021	13724.1	14835.3	12876.6
1	Deaths	44636	Low-middle SDI	2	Female	12	35-39 years	1048	COVID-19	1	Number	2021	19920.7	21563.6	18703.1
1	Deaths	44636	Low-middle SDI	2	Female	13	40-44 years	1048	COVID-19	1	Number	2021	29175.6	31694.5	27430
1	Deaths	44636	Low-middle SDI	2	Female	14	45-49 years	1048	COVID-19	1	Number	2021	35315.6	38437.7	33221
1	Deaths	44636	Low-middle SDI	2	Female	15	50-54 years	1048	COVID-19	1	Number	2021	40214	43836.8	37717.3
1	Deaths	44636	Low-middle SDI	2	Female	16	55-59 years	1048	COVID-19	1	Number	2021	51904.4	56820.5	48638.4
1	Deaths	44636	Low-middle SDI	2	Female	17	60-64 years	1048	COVID-19	1	Number	2021	73559	80565.2	69100
1	Deaths	44636	Low-middle SDI	2	Female	18	65-69 years	1048	COVID-19	1	Number	2021	92354.6	100578	87021.1
1	Deaths	44636	Low-middle SDI	2	Female	19	70-74 years	1048	COVID-19	1	Number	2021	101240	109124	95775.3
1	Deaths	44636	Low-middle SDI	2	Female	20	75-79 years	1048	COVID-19	1	Number	2021	89141.7	96093.7	84240.7
1	Deaths	44636	Low-middle SDI	2	Female	30	80-84 years	1048	COVID-19	1	Number	2021	91799.2	98396.4	87107.8
1	Deaths	44636	Low-middle SDI	2	Female	31	85-89 years	1048	COVID-19	1	Number	2021	64593.9	69498.6	61129
1	Deaths	44636	Low-middle SDI	2	Female	32	90-94 years	1048	COVID-19	1	Number	2021	39952	43028.3	37678.6
1	Deaths	44636	Low-middle SDI	2	Female	235	95+ years	1048	COVID-19	1	Number	2021	15540.6	16821.2	14623.6
1	Deaths	44636	Low-middle SDI	3	Both	1	<5 years	1048	COVID-19	1	Number	2021	5987.95	6588.77	5517.45
1	Deaths	44636	Low-middle SDI	3	Both	6	5-9 years	1048	COVID-19	1	Number	2021	4122.67	5139.33	2898.83
1	Deaths	44636	Low-middle SDI	3	Both	7	10-14 years	1048	COVID-19	1	Number	2021	5285.61	6403.23	3705.06
1	Deaths	44636	Low-middle SDI	3	Both	8	15-19 years	1048	COVID-19	1	Number	2021	9313.54	10018.7	8727.42
1	Deaths	44636	Low-middle SDI	3	Both	9	20-24 years	1048	COVID-19	1	Number	2021	13993	15030.6	13196.3
1	Deaths	44636	Low-middle SDI	3	Both	10	25-29 years	1048	COVID-19	1	Number	2021	26618.2	28662.7	25093.3
1	Deaths	44636	Low-middle SDI	3	Both	11	30-34 years	1048	COVID-19	1	Number	2021	45389.4	49044.7	42691.9
1	Deaths	44636	Low-middle SDI	3	Both	12	35-39 years	1048	COVID-19	1	Number	2021	62891.1	67999.3	59148.5
1	Deaths	44636	Low-middle SDI	3	Both	13	40-44 years	1048	COVID-19	1	Number	2021	92260	99963.3	86705.7
1	Deaths	44636	Low-middle SDI	3	Both	14	45-49 years	1048	COVID-19	1	Number	2021	111140	120515	104377
1	Deaths	44636	Low-middle SDI	3	Both	15	50-54 years	1048	COVID-19	1	Number	2021	130432	142084	122188
1	Deaths	44636	Low-middle SDI	3	Both	16	55-59 years	1048	COVID-19	1	Number	2021	165672	180875	154880
1	Deaths	44636	Low-middle SDI	3	Both	17	60-64 years	1048	COVID-19	1	Number	2021	224343	244735	210103
1	Deaths	44636	Low-middle SDI	3	Both	18	65-69 years	1048	COVID-19	1	Number	2021	278469	302168	261750
1	Deaths	44636	Low-middle SDI	3	Both	19	70-74 years	1048	COVID-19	1	Number	2021	288687	310242	273013
1	Deaths	44636	Low-middle SDI	3	Both	20	75-79 years	1048	COVID-19	1	Number	2021	250522	268552	237114
1	Deaths	44636	Low-middle SDI	3	Both	30	80-84 years	1048	COVID-19	1	Number	2021	224957	240672	213072
1	Deaths	44636	Low-middle SDI	3	Both	31	85-89 years	1048	COVID-19	1	Number	2021	144472	154920	136391
1	Deaths	44636	Low-middle SDI	3	Both	32	90-94 years	1048	COVID-19	1	Number	2021	85065.7	91221.9	80238.3
1	Deaths	44636	Low-middle SDI	3	Both	235	95+ years	1048	COVID-19	1	Number	2021	30185.1	32527.5	28389.7
1	Deaths	44637	Low SDI	1	Male	1	<5 years	1048	COVID-19	1	Number	2021	2971.73	3187.43	2763.25
1	Deaths	44637	Low SDI	1	Male	6	5-9 years	1048	COVID-19	1	Number	2021	1931.47	2200.35	1477.14
1	Deaths	44637	Low SDI	1	Male	7	10-14 years	1048	COVID-19	1	Number	2021	2492.04	2779.02	1849.14
1	Deaths	44637	Low SDI	1	Male	8	15-19 years	1048	COVID-19	1	Number	2021	4059.59	4321.12	3773.68
1	Deaths	44637	Low SDI	1	Male	9	20-24 years	1048	COVID-19	1	Number	2021	5789.07	6160.45	5398.81
1	Deaths	44637	Low SDI	1	Male	10	25-29 years	1048	COVID-19	1	Number	2021	11553.4	12309.5	10773.3
1	Deaths	44637	Low SDI	1	Male	11	30-34 years	1048	COVID-19	1	Number	2021	20154.8	21473	18827.3
1	Deaths	44637	Low SDI	1	Male	12	35-39 years	1048	COVID-19	1	Number	2021	26133.6	27852.4	24461.8
1	Deaths	44637	Low SDI	1	Male	13	40-44 years	1048	COVID-19	1	Number	2021	37396.1	39871	34969
1	Deaths	44637	Low SDI	1	Male	14	45-49 years	1048	COVID-19	1	Number	2021	43860.2	46751.3	40930.8
1	Deaths	44637	Low SDI	1	Male	15	50-54 years	1048	COVID-19	1	Number	2021	49015.5	52242.6	45747.9
1	Deaths	44637	Low SDI	1	Male	16	55-59 years	1048	COVID-19	1	Number	2021	57725.8	61461.4	53981.1
1	Deaths	44637	Low SDI	1	Male	17	60-64 years	1048	COVID-19	1	Number	2021	72426.5	76852.3	67904.1
1	Deaths	44637	Low SDI	1	Male	18	65-69 years	1048	COVID-19	1	Number	2021	87798.6	92888.6	82355.6
1	Deaths	44637	Low SDI	1	Male	19	70-74 years	1048	COVID-19	1	Number	2021	82884	87615.9	77937.2
1	Deaths	44637	Low SDI	1	Male	20	75-79 years	1048	COVID-19	1	Number	2021	72261.1	76518.5	67824.4
1	Deaths	44637	Low SDI	1	Male	30	80-84 years	1048	COVID-19	1	Number	2021	57290.9	60803.4	53785.2
1	Deaths	44637	Low SDI	1	Male	31	85-89 years	1048	COVID-19	1	Number	2021	34093.2	36178.1	31980.5
1	Deaths	44637	Low SDI	1	Male	32	90-94 years	1048	COVID-19	1	Number	2021	17296.4	18318	16247.9
1	Deaths	44637	Low SDI	1	Male	235	95+ years	1048	COVID-19	1	Number	2021	4105.91	4396.55	3832.99
1	Deaths	44637	Low SDI	2	Female	1	<5 years	1048	COVID-19	1	Number	2021	2543.99	2727.39	2364.93
1	Deaths	44637	Low SDI	2	Female	6	5-9 years	1048	COVID-19	1	Number	2021	1343.73	1714.52	863.986
1	Deaths	44637	Low SDI	2	Female	7	10-14 years	1048	COVID-19	1	Number	2021	1549.42	2034.5	820.45
1	Deaths	44637	Low SDI	2	Female	8	15-19 years	1048	COVID-19	1	Number	2021	4081.93	4350.02	3789.25
1	Deaths	44637	Low SDI	2	Female	9	20-24 years	1048	COVID-19	1	Number	2021	4788.87	5103.29	4448.42
1	Deaths	44637	Low SDI	2	Female	10	25-29 years	1048	COVID-19	1	Number	2021	6869.71	7330.68	6388.37
1	Deaths	44637	Low SDI	2	Female	11	30-34 years	1048	COVID-19	1	Number	2021	9253.76	9884.01	8619.6
1	Deaths	44637	Low SDI	2	Female	12	35-39 years	1048	COVID-19	1	Number	2021	12805.7	13668.5	11958.5
1	Deaths	44637	Low SDI	2	Female	13	40-44 years	1048	COVID-19	1	Number	2021	17697.9	18889.5	16559
1	Deaths	44637	Low SDI	2	Female	14	45-49 years	1048	COVID-19	1	Number	2021	20227.4	21547.3	18910.9
1	Deaths	44637	Low SDI	2	Female	15	50-54 years	1048	COVID-19	1	Number	2021	21670.4	23077.8	20249.1
1	Deaths	44637	Low SDI	2	Female	16	55-59 years	1048	COVID-19	1	Number	2021	25894.7	27493.6	24259
1	Deaths	44637	Low SDI	2	Female	17	60-64 years	1048	COVID-19	1	Number	2021	34391.2	36435.5	32259.5
1	Deaths	44637	Low SDI	2	Female	18	65-69 years	1048	COVID-19	1	Number	2021	42629.1	45022.8	40008.1
1	Deaths	44637	Low SDI	2	Female	19	70-74 years	1048	COVID-19	1	Number	2021	43404.4	45809.2	40763.9
1	Deaths	44637	Low SDI	2	Female	20	75-79 years	1048	COVID-19	1	Number	2021	39381.2	41685.3	36972.3
1	Deaths	44637	Low SDI	2	Female	30	80-84 years	1048	COVID-19	1	Number	2021	37070.2	39179.7	34825.1
1	Deaths	44637	Low SDI	2	Female	31	85-89 years	1048	COVID-19	1	Number	2021	25463.1	26886	23914.3
1	Deaths	44637	Low SDI	2	Female	32	90-94 years	1048	COVID-19	1	Number	2021	15129.6	15970.2	14240.7
1	Deaths	44637	Low SDI	2	Female	235	95+ years	1048	COVID-19	1	Number	2021	5556.52	5881.95	5201.82
1	Deaths	44637	Low SDI	3	Both	1	<5 years	1048	COVID-19	1	Number	2021	5515.71	5914.82	5127.76
1	Deaths	44637	Low SDI	3	Both	6	5-9 years	1048	COVID-19	1	Number	2021	3275.2	3891.17	2372.05
1	Deaths	44637	Low SDI	3	Both	7	10-14 years	1048	COVID-19	1	Number	2021	4041.46	4756.3	2742.89
1	Deaths	44637	Low SDI	3	Both	8	15-19 years	1048	COVID-19	1	Number	2021	8141.52	8671.71	7562.93
1	Deaths	44637	Low SDI	3	Both	9	20-24 years	1048	COVID-19	1	Number	2021	10577.9	11264.4	9845.6
1	Deaths	44637	Low SDI	3	Both	10	25-29 years	1048	COVID-19	1	Number	2021	18423.1	19637.8	17158.9
1	Deaths	44637	Low SDI	3	Both	11	30-34 years	1048	COVID-19	1	Number	2021	29408.5	31348.3	27445.1
1	Deaths	44637	Low SDI	3	Both	12	35-39 years	1048	COVID-19	1	Number	2021	38939.3	41522	36435.9
1	Deaths	44637	Low SDI	3	Both	13	40-44 years	1048	COVID-19	1	Number	2021	55094	58760.2	51565.6
1	Deaths	44637	Low SDI	3	Both	14	45-49 years	1048	COVID-19	1	Number	2021	64087.6	68300.5	59841.7
1	Deaths	44637	Low SDI	3	Both	15	50-54 years	1048	COVID-19	1	Number	2021	70685.8	75306.7	66000.8
1	Deaths	44637	Low SDI	3	Both	16	55-59 years	1048	COVID-19	1	Number	2021	83620.5	88951	78277.5
1	Deaths	44637	Low SDI	3	Both	17	60-64 years	1048	COVID-19	1	Number	2021	106818	113243	100244
1	Deaths	44637	Low SDI	3	Both	18	65-69 years	1048	COVID-19	1	Number	2021	130428	137888	122439
1	Deaths	44637	Low SDI	3	Both	19	70-74 years	1048	COVID-19	1	Number	2021	126288	133449	118686
1	Deaths	44637	Low SDI	3	Both	20	75-79 years	1048	COVID-19	1	Number	2021	111642	118146	104867
1	Deaths	44637	Low SDI	3	Both	30	80-84 years	1048	COVID-19	1	Number	2021	94361.1	99952.8	88549.8
1	Deaths	44637	Low SDI	3	Both	31	85-89 years	1048	COVID-19	1	Number	2021	59556.3	63058	55892.5
1	Deaths	44637	Low SDI	3	Both	32	90-94 years	1048	COVID-19	1	Number	2021	32425.9	34258.4	30528.8
1	Deaths	44637	Low SDI	3	Both	235	95+ years	1048	COVID-19	1	Number	2021	9662.42	10257.2	9060.66
1	Deaths	44639	Middle SDI	1	Male	1	<5 years	1048	COVID-19	1	Number	2021	2242.74	2612.25	1991.4
1	Deaths	44639	Middle SDI	1	Male	6	5-9 years	1048	COVID-19	1	Number	2021	1866.58	2281.79	1520.22
1	Deaths	44639	Middle SDI	1	Male	7	10-14 years	1048	COVID-19	1	Number	2021	2306.48	2855.84	1835.72
1	Deaths	44639	Middle SDI	1	Male	8	15-19 years	1048	COVID-19	1	Number	2021	2797.44	3341.31	2389.61
1	Deaths	44639	Middle SDI	1	Male	9	20-24 years	1048	COVID-19	1	Number	2021	5078.44	5964.07	4370.82
1	Deaths	44639	Middle SDI	1	Male	10	25-29 years	1048	COVID-19	1	Number	2021	13094.9	14797	11817.4
1	Deaths	44639	Middle SDI	1	Male	11	30-34 years	1048	COVID-19	1	Number	2021	27239.6	30151.6	24980.2
1	Deaths	44639	Middle SDI	1	Male	12	35-39 years	1048	COVID-19	1	Number	2021	40218.5	44437.5	36987.1
1	Deaths	44639	Middle SDI	1	Male	13	40-44 years	1048	COVID-19	1	Number	2021	59850.1	66455.1	54858.5
1	Deaths	44639	Middle SDI	1	Male	14	45-49 years	1048	COVID-19	1	Number	2021	76774.1	85792.1	69958
1	Deaths	44639	Middle SDI	1	Male	15	50-54 years	1048	COVID-19	1	Number	2021	94705.7	106086	86115.2
1	Deaths	44639	Middle SDI	1	Male	16	55-59 years	1048	COVID-19	1	Number	2021	123668	138729	112655
1	Deaths	44639	Middle SDI	1	Male	17	60-64 years	1048	COVID-19	1	Number	2021	157629	177258	144160
1	Deaths	44639	Middle SDI	1	Male	18	65-69 years	1048	COVID-19	1	Number	2021	180955	203368	165759
1	Deaths	44639	Middle SDI	1	Male	19	70-74 years	1048	COVID-19	1	Number	2021	169180	188691	155724
1	Deaths	44639	Middle SDI	1	Male	20	75-79 years	1048	COVID-19	1	Number	2021	145340	161540	133692
1	Deaths	44639	Middle SDI	1	Male	30	80-84 years	1048	COVID-19	1	Number	2021	128837	142768	119213
1	Deaths	44639	Middle SDI	1	Male	31	85-89 years	1048	COVID-19	1	Number	2021	92412.9	101413	86249
1	Deaths	44639	Middle SDI	1	Male	32	90-94 years	1048	COVID-19	1	Number	2021	54711.3	59849	51257.1
1	Deaths	44639	Middle SDI	1	Male	235	95+ years	1048	COVID-19	1	Number	2021	25233.5	27221.5	23588.8
1	Deaths	44639	Middle SDI	2	Female	1	<5 years	1048	COVID-19	1	Number	2021	1890.28	2232.29	1671.89
1	Deaths	44639	Middle SDI	2	Female	6	5-9 years	1048	COVID-19	1	Number	2021	1349	1708.65	1032.18
1	Deaths	44639	Middle SDI	2	Female	7	10-14 years	1048	COVID-19	1	Number	2021	1627.56	2040.19	1248.93
1	Deaths	44639	Middle SDI	2	Female	8	15-19 years	1048	COVID-19	1	Number	2021	2629.94	2974.06	2384.13
1	Deaths	44639	Middle SDI	2	Female	9	20-24 years	1048	COVID-19	1	Number	2021	4129.87	4733.92	3640.13
1	Deaths	44639	Middle SDI	2	Female	10	25-29 years	1048	COVID-19	1	Number	2021	7894.17	8932.55	7083.41
1	Deaths	44639	Middle SDI	2	Female	11	30-34 years	1048	COVID-19	1	Number	2021	12526	13955.7	11447.1
1	Deaths	44639	Middle SDI	2	Female	12	35-39 years	1048	COVID-19	1	Number	2021	19587.8	21668.2	18019.8
1	Deaths	44639	Middle SDI	2	Female	13	40-44 years	1048	COVID-19	1	Number	2021	28845	32104.4	26544.6
1	Deaths	44639	Middle SDI	2	Female	14	45-49 years	1048	COVID-19	1	Number	2021	37127.5	41615.4	33985
1	Deaths	44639	Middle SDI	2	Female	15	50-54 years	1048	COVID-19	1	Number	2021	45550.2	51333.7	41532.4
1	Deaths	44639	Middle SDI	2	Female	16	55-59 years	1048	COVID-19	1	Number	2021	62147.2	69843.7	56733.7
1	Deaths	44639	Middle SDI	2	Female	17	60-64 years	1048	COVID-19	1	Number	2021	83702.7	93976.5	76481.6
1	Deaths	44639	Middle SDI	2	Female	18	65-69 years	1048	COVID-19	1	Number	2021	97048	108998	88855.7
1	Deaths	44639	Middle SDI	2	Female	19	70-74 years	1048	COVID-19	1	Number	2021	99791.9	111494	91624.8
1	Deaths	44639	Middle SDI	2	Female	20	75-79 years	1048	COVID-19	1	Number	2021	90500.7	101845	82928.1
1	Deaths	44639	Middle SDI	2	Female	30	80-84 years	1048	COVID-19	1	Number	2021	95718.5	106990	88221.7
1	Deaths	44639	Middle SDI	2	Female	31	85-89 years	1048	COVID-19	1	Number	2021	82722.3	92706.7	76007.7
1	Deaths	44639	Middle SDI	2	Female	32	90-94 years	1048	COVID-19	1	Number	2021	54895	61721.9	50758
1	Deaths	44639	Middle SDI	2	Female	235	95+ years	1048	COVID-19	1	Number	2021	22798.8	25930.4	21011.3
1	Deaths	44639	Middle SDI	3	Both	1	<5 years	1048	COVID-19	1	Number	2021	4133.02	4852.09	3690.26
1	Deaths	44639	Middle SDI	3	Both	6	5-9 years	1048	COVID-19	1	Number	2021	3215.58	3965.66	2551.89
1	Deaths	44639	Middle SDI	3	Both	7	10-14 years	1048	COVID-19	1	Number	2021	3934.04	4839.4	3195.32
1	Deaths	44639	Middle SDI	3	Both	8	15-19 years	1048	COVID-19	1	Number	2021	5427.38	6263.7	4874.28
1	Deaths	44639	Middle SDI	3	Both	9	20-24 years	1048	COVID-19	1	Number	2021	9208.3	10547.2	8225.07
1	Deaths	44639	Middle SDI	3	Both	10	25-29 years	1048	COVID-19	1	Number	2021	20989.1	23453.4	19168.3
1	Deaths	44639	Middle SDI	3	Both	11	30-34 years	1048	COVID-19	1	Number	2021	39765.7	43973.2	36672.4
1	Deaths	44639	Middle SDI	3	Both	12	35-39 years	1048	COVID-19	1	Number	2021	59806.3	65890.3	55327.3
1	Deaths	44639	Middle SDI	3	Both	13	40-44 years	1048	COVID-19	1	Number	2021	88695.1	98077.6	81932.6
1	Deaths	44639	Middle SDI	3	Both	14	45-49 years	1048	COVID-19	1	Number	2021	113902	126330	104513
1	Deaths	44639	Middle SDI	3	Both	15	50-54 years	1048	COVID-19	1	Number	2021	140256	156197	128594
1	Deaths	44639	Middle SDI	3	Both	16	55-59 years	1048	COVID-19	1	Number	2021	185816	207178	170753
1	Deaths	44639	Middle SDI	3	Both	17	60-64 years	1048	COVID-19	1	Number	2021	241331	270285	222057
1	Deaths	44639	Middle SDI	3	Both	18	65-69 years	1048	COVID-19	1	Number	2021	278003	311832	256582
1	Deaths	44639	Middle SDI	3	Both	19	70-74 years	1048	COVID-19	1	Number	2021	268972	300286	249142
1	Deaths	44639	Middle SDI	3	Both	20	75-79 years	1048	COVID-19	1	Number	2021	235840	262870	218239
1	Deaths	44639	Middle SDI	3	Both	30	80-84 years	1048	COVID-19	1	Number	2021	224556	249948	208666
1	Deaths	44639	Middle SDI	3	Both	31	85-89 years	1048	COVID-19	1	Number	2021	175135	193746	163751
1	Deaths	44639	Middle SDI	3	Both	32	90-94 years	1048	COVID-19	1	Number	2021	109606	121609	102750
1	Deaths	44639	Middle SDI	3	Both	235	95+ years	1048	COVID-19	1	Number	2021	48032.3	53308.8	44886.4
2	DALYs (Disability-Adjusted Life Years)	1	Global	1	Male	1	<5 years	1048	COVID-19	1	Number	2020	540122	665928	480390
2	DALYs (Disability-Adjusted Life Years)	1	Global	1	Male	6	5-9 years	1048	COVID-19	1	Number	2020	472764	690305	358199
2	DALYs (Disability-Adjusted Life Years)	1	Global	1	Male	7	10-14 years	1048	COVID-19	1	Number	2020	527652	749288	405947
2	DALYs (Disability-Adjusted Life Years)	1	Global	1	Male	8	15-19 years	1048	COVID-19	1	Number	2020	805008	1.03664e+06	704487
2	DALYs (Disability-Adjusted Life Years)	1	Global	1	Male	9	20-24 years	1048	COVID-19	1	Number	2020	1.2218e+06	1.52909e+06	1.07092e+06
2	DALYs (Disability-Adjusted Life Years)	1	Global	1	Male	10	25-29 years	1048	COVID-19	1	Number	2020	2.13766e+06	2.43741e+06	1.97006e+06
2	DALYs (Disability-Adjusted Life Years)	1	Global	1	Male	11	30-34 years	1048	COVID-19	1	Number	2020	3.45129e+06	3.74817e+06	3.2421e+06
2	DALYs (Disability-Adjusted Life Years)	1	Global	1	Male	12	35-39 years	1048	COVID-19	1	Number	2020	4.21808e+06	4.52427e+06	3.97795e+06
2	DALYs (Disability-Adjusted Life Years)	1	Global	1	Male	13	40-44 years	1048	COVID-19	1	Number	2020	5.56292e+06	5.97358e+06	5.24782e+06
2	DALYs (Disability-Adjusted Life Years)	1	Global	1	Male	14	45-49 years	1048	COVID-19	1	Number	2020	6.24975e+06	6.71301e+06	5.8983e+06
2	DALYs (Disability-Adjusted Life Years)	1	Global	1	Male	15	50-54 years	1048	COVID-19	1	Number	2020	6.79092e+06	7.2983e+06	6.39784e+06
2	DALYs (Disability-Adjusted Life Years)	1	Global	1	Male	16	55-59 years	1048	COVID-19	1	Number	2020	7.80172e+06	8.385e+06	7.35115e+06
2	DALYs (Disability-Adjusted Life Years)	1	Global	1	Male	17	60-64 years	1048	COVID-19	1	Number	2020	8.99286e+06	9.61563e+06	8.48095e+06
2	DALYs (Disability-Adjusted Life Years)	1	Global	1	Male	18	65-69 years	1048	COVID-19	1	Number	2020	9.15019e+06	9.81166e+06	8.63651e+06
2	DALYs (Disability-Adjusted Life Years)	1	Global	1	Male	19	70-74 years	1048	COVID-19	1	Number	2020	7.54079e+06	8.03178e+06	7.14557e+06
2	DALYs (Disability-Adjusted Life Years)	1	Global	1	Male	20	75-79 years	1048	COVID-19	1	Number	2020	5.41734e+06	5.77234e+06	5.14747e+06
2	DALYs (Disability-Adjusted Life Years)	1	Global	1	Male	30	80-84 years	1048	COVID-19	1	Number	2020	3.95501e+06	4.19721e+06	3.76495e+06
2	DALYs (Disability-Adjusted Life Years)	1	Global	1	Male	31	85-89 years	1048	COVID-19	1	Number	2020	2.21497e+06	2.34682e+06	2.10774e+06
2	DALYs (Disability-Adjusted Life Years)	1	Global	1	Male	32	90-94 years	1048	COVID-19	1	Number	2020	1.10913e+06	1.16684e+06	1.05775e+06
2	DALYs (Disability-Adjusted Life Years)	1	Global	1	Male	235	95+ years	1048	COVID-19	1	Number	2020	374142	393970	356178
2	DALYs (Disability-Adjusted Life Years)	1	Global	2	Female	1	<5 years	1048	COVID-19	1	Number	2020	465203	587406	409857
2	DALYs (Disability-Adjusted Life Years)	1	Global	2	Female	6	5-9 years	1048	COVID-19	1	Number	2020	373175	581747	258402
2	DALYs (Disability-Adjusted Life Years)	1	Global	2	Female	7	10-14 years	1048	COVID-19	1	Number	2020	398069	618297	275902
2	DALYs (Disability-Adjusted Life Years)	1	Global	2	Female	8	15-19 years	1048	COVID-19	1	Number	2020	688825	904716	599516
2	DALYs (Disability-Adjusted Life Years)	1	Global	2	Female	9	20-24 years	1048	COVID-19	1	Number	2020	1.07153e+06	1.60808e+06	811223
2	DALYs (Disability-Adjusted Life Years)	1	Global	2	Female	10	25-29 years	1048	COVID-19	1	Number	2020	1.39521e+06	1.89508e+06	1.14687e+06
2	DALYs (Disability-Adjusted Life Years)	1	Global	2	Female	11	30-34 years	1048	COVID-19	1	Number	2020	1.73563e+06	2.19266e+06	1.49854e+06
2	DALYs (Disability-Adjusted Life Years)	1	Global	2	Female	12	35-39 years	1048	COVID-19	1	Number	2020	2.15503e+06	2.56344e+06	1.92725e+06
2	DALYs (Disability-Adjusted Life Years)	1	Global	2	Female	13	40-44 years	1048	COVID-19	1	Number	2020	2.74101e+06	3.08402e+06	2.52429e+06
2	DALYs (Disability-Adjusted Life Years)	1	Global	2	Female	14	45-49 years	1048	COVID-19	1	Number	2020	3.03284e+06	3.35673e+06	2.81444e+06
2	DALYs (Disability-Adjusted Life Years)	1	Global	2	Female	15	50-54 years	1048	COVID-19	1	Number	2020	3.19422e+06	3.50302e+06	2.97146e+06
2	DALYs (Disability-Adjusted Life Years)	1	Global	2	Female	16	55-59 years	1048	COVID-19	1	Number	2020	3.73208e+06	4.0461e+06	3.50254e+06
2	DALYs (Disability-Adjusted Life Years)	1	Global	2	Female	17	60-64 years	1048	COVID-19	1	Number	2020	4.54803e+06	4.87536e+06	4.30664e+06
2	DALYs (Disability-Adjusted Life Years)	1	Global	2	Female	18	65-69 years	1048	COVID-19	1	Number	2020	4.75235e+06	5.07338e+06	4.50572e+06
2	DALYs (Disability-Adjusted Life Years)	1	Global	2	Female	19	70-74 years	1048	COVID-19	1	Number	2020	4.30531e+06	4.57442e+06	4.09533e+06
2	DALYs (Disability-Adjusted Life Years)	1	Global	2	Female	20	75-79 years	1048	COVID-19	1	Number	2020	3.27786e+06	3.47185e+06	3.12314e+06
2	DALYs (Disability-Adjusted Life Years)	1	Global	2	Female	30	80-84 years	1048	COVID-19	1	Number	2020	2.98241e+06	3.15988e+06	2.84789e+06
2	DALYs (Disability-Adjusted Life Years)	1	Global	2	Female	31	85-89 years	1048	COVID-19	1	Number	2020	2.04634e+06	2.16194e+06	1.95169e+06
2	DALYs (Disability-Adjusted Life Years)	1	Global	2	Female	32	90-94 years	1048	COVID-19	1	Number	2020	1.31895e+06	1.38517e+06	1.26276e+06
2	DALYs (Disability-Adjusted Life Years)	1	Global	2	Female	235	95+ years	1048	COVID-19	1	Number	2020	604573	631041	578865
2	DALYs (Disability-Adjusted Life Years)	1	Global	3	Both	1	<5 years	1048	COVID-19	1	Number	2020	1.00532e+06	1.25467e+06	889446
2	DALYs (Disability-Adjusted Life Years)	1	Global	3	Both	6	5-9 years	1048	COVID-19	1	Number	2020	845939	1.2705e+06	623964
2	DALYs (Disability-Adjusted Life Years)	1	Global	3	Both	7	10-14 years	1048	COVID-19	1	Number	2020	925721	1.36164e+06	682157
2	DALYs (Disability-Adjusted Life Years)	1	Global	3	Both	8	15-19 years	1048	COVID-19	1	Number	2020	1.49383e+06	1.94647e+06	1.30347e+06
2	DALYs (Disability-Adjusted Life Years)	1	Global	3	Both	9	20-24 years	1048	COVID-19	1	Number	2020	2.29334e+06	3.16269e+06	1.88784e+06
2	DALYs (Disability-Adjusted Life Years)	1	Global	3	Both	10	25-29 years	1048	COVID-19	1	Number	2020	3.53288e+06	4.35052e+06	3.1237e+06
2	DALYs (Disability-Adjusted Life Years)	1	Global	3	Both	11	30-34 years	1048	COVID-19	1	Number	2020	5.18691e+06	5.9363e+06	4.76849e+06
2	DALYs (Disability-Adjusted Life Years)	1	Global	3	Both	12	35-39 years	1048	COVID-19	1	Number	2020	6.37311e+06	7.05998e+06	5.94854e+06
2	DALYs (Disability-Adjusted Life Years)	1	Global	3	Both	13	40-44 years	1048	COVID-19	1	Number	2020	8.30393e+06	8.95733e+06	7.81096e+06
2	DALYs (Disability-Adjusted Life Years)	1	Global	3	Both	14	45-49 years	1048	COVID-19	1	Number	2020	9.28259e+06	9.99245e+06	8.73245e+06
2	DALYs (Disability-Adjusted Life Years)	1	Global	3	Both	15	50-54 years	1048	COVID-19	1	Number	2020	9.98514e+06	1.07518e+07	9.40151e+06
2	DALYs (Disability-Adjusted Life Years)	1	Global	3	Both	16	55-59 years	1048	COVID-19	1	Number	2020	1.15338e+07	1.23576e+07	1.08798e+07
2	DALYs (Disability-Adjusted Life Years)	1	Global	3	Both	17	60-64 years	1048	COVID-19	1	Number	2020	1.35409e+07	1.44803e+07	1.28e+07
2	DALYs (Disability-Adjusted Life Years)	1	Global	3	Both	18	65-69 years	1048	COVID-19	1	Number	2020	1.39025e+07	1.48798e+07	1.31596e+07
2	DALYs (Disability-Adjusted Life Years)	1	Global	3	Both	19	70-74 years	1048	COVID-19	1	Number	2020	1.18461e+07	1.26006e+07	1.12676e+07
2	DALYs (Disability-Adjusted Life Years)	1	Global	3	Both	20	75-79 years	1048	COVID-19	1	Number	2020	8.6952e+06	9.24423e+06	8.29283e+06
2	DALYs (Disability-Adjusted Life Years)	1	Global	3	Both	30	80-84 years	1048	COVID-19	1	Number	2020	6.93743e+06	7.35154e+06	6.62528e+06
2	DALYs (Disability-Adjusted Life Years)	1	Global	3	Both	31	85-89 years	1048	COVID-19	1	Number	2020	4.2613e+06	4.5105e+06	4.07207e+06
2	DALYs (Disability-Adjusted Life Years)	1	Global	3	Both	32	90-94 years	1048	COVID-19	1	Number	2020	2.42808e+06	2.55053e+06	2.32428e+06
2	DALYs (Disability-Adjusted Life Years)	1	Global	3	Both	235	95+ years	1048	COVID-19	1	Number	2020	978714	1.02325e+06	935760
2	DALYs (Disability-Adjusted Life Years)	44634	High-middle SDI	1	Male	1	<5 years	1048	COVID-19	1	Number	2020	21055.3	27542.5	17605.6
2	DALYs (Disability-Adjusted Life Years)	44634	High-middle SDI	1	Male	6	5-9 years	1048	COVID-19	1	Number	2020	19413.7	31781.6	13871.4
2	DALYs (Disability-Adjusted Life Years)	44634	High-middle SDI	1	Male	7	10-14 years	1048	COVID-19	1	Number	2020	22244.1	35208	16359.8
2	DALYs (Disability-Adjusted Life Years)	44634	High-middle SDI	1	Male	8	15-19 years	1048	COVID-19	1	Number	2020	33531.9	46377.7	27280
2	DALYs (Disability-Adjusted Life Years)	44634	High-middle SDI	1	Male	9	20-24 years	1048	COVID-19	1	Number	2020	57028.1	77449.7	46831.5
2	DALYs (Disability-Adjusted Life Years)	44634	High-middle SDI	1	Male	10	25-29 years	1048	COVID-19	1	Number	2020	119290	142490	104801
2	DALYs (Disability-Adjusted Life Years)	44634	High-middle SDI	1	Male	11	30-34 years	1048	COVID-19	1	Number	2020	242106	270432	216337
2	DALYs (Disability-Adjusted Life Years)	44634	High-middle SDI	1	Male	12	35-39 years	1048	COVID-19	1	Number	2020	331976	371316	296616
2	DALYs (Disability-Adjusted Life Years)	44634	High-middle SDI	1	Male	13	40-44 years	1048	COVID-19	1	Number	2020	498932	556413	446568
2	DALYs (Disability-Adjusted Life Years)	44634	High-middle SDI	1	Male	14	45-49 years	1048	COVID-19	1	Number	2020	589099	658701	526016
2	DALYs (Disability-Adjusted Life Years)	44634	High-middle SDI	1	Male	15	50-54 years	1048	COVID-19	1	Number	2020	689765	773318	614198
2	DALYs (Disability-Adjusted Life Years)	44634	High-middle SDI	1	Male	16	55-59 years	1048	COVID-19	1	Number	2020	913504	1.02587e+06	812279
2	DALYs (Disability-Adjusted Life Years)	44634	High-middle SDI	1	Male	17	60-64 years	1048	COVID-19	1	Number	2020	1.15101e+06	1.28591e+06	1.02679e+06
2	DALYs (Disability-Adjusted Life Years)	44634	High-middle SDI	1	Male	18	65-69 years	1048	COVID-19	1	Number	2020	1.25028e+06	1.39189e+06	1.11966e+06
2	DALYs (Disability-Adjusted Life Years)	44634	High-middle SDI	1	Male	19	70-74 years	1048	COVID-19	1	Number	2020	1.08639e+06	1.19367e+06	981218
2	DALYs (Disability-Adjusted Life Years)	44634	High-middle SDI	1	Male	20	75-79 years	1048	COVID-19	1	Number	2020	727370	791410	663646
2	DALYs (Disability-Adjusted Life Years)	44634	High-middle SDI	1	Male	30	80-84 years	1048	COVID-19	1	Number	2020	643865	699117	590936
2	DALYs (Disability-Adjusted Life Years)	44634	High-middle SDI	1	Male	31	85-89 years	1048	COVID-19	1	Number	2020	418312	451177	386854
2	DALYs (Disability-Adjusted Life Years)	44634	High-middle SDI	1	Male	32	90-94 years	1048	COVID-19	1	Number	2020	209716	224656	195163
2	DALYs (Disability-Adjusted Life Years)	44634	High-middle SDI	1	Male	235	95+ years	1048	COVID-19	1	Number	2020	58259.6	62379.8	53989.7
2	DALYs (Disability-Adjusted Life Years)	44634	High-middle SDI	2	Female	1	<5 years	1048	COVID-19	1	Number	2020	18344.6	24182.7	15501.6
2	DALYs (Disability-Adjusted Life Years)	44634	High-middle SDI	2	Female	6	5-9 years	1048	COVID-19	1	Number	2020	16438.7	28366.5	11561.7
2	DALYs (Disability-Adjusted Life Years)	44634	High-middle SDI	2	Female	7	10-14 years	1048	COVID-19	1	Number	2020	18561.9	30422.5	13365.9
2	DALYs (Disability-Adjusted Life Years)	44634	High-middle SDI	2	Female	8	15-19 years	1048	COVID-19	1	Number	2020	30942.4	42673.5	25470.1
2	DALYs (Disability-Adjusted Life Years)	44634	High-middle SDI	2	Female	9	20-24 years	1048	COVID-19	1	Number	2020	54282.5	85291.9	38694.3
2	DALYs (Disability-Adjusted Life Years)	44634	High-middle SDI	2	Female	10	25-29 years	1048	COVID-19	1	Number	2020	81184.6	113377	62997.8
2	DALYs (Disability-Adjusted Life Years)	44634	High-middle SDI	2	Female	11	30-34 years	1048	COVID-19	1	Number	2020	129634	165354	106546
2	DALYs (Disability-Adjusted Life Years)	44634	High-middle SDI	2	Female	12	35-39 years	1048	COVID-19	1	Number	2020	171324	205765	144591
2	DALYs (Disability-Adjusted Life Years)	44634	High-middle SDI	2	Female	13	40-44 years	1048	COVID-19	1	Number	2020	250680	284579	218923
2	DALYs (Disability-Adjusted Life Years)	44634	High-middle SDI	2	Female	14	45-49 years	1048	COVID-19	1	Number	2020	302692	340316	267877
2	DALYs (Disability-Adjusted Life Years)	44634	High-middle SDI	2	Female	15	50-54 years	1048	COVID-19	1	Number	2020	346259	389978	307531
2	DALYs (Disability-Adjusted Life Years)	44634	High-middle SDI	2	Female	16	55-59 years	1048	COVID-19	1	Number	2020	463382	519587	413303
2	DALYs (Disability-Adjusted Life Years)	44634	High-middle SDI	2	Female	17	60-64 years	1048	COVID-19	1	Number	2020	638467	709069	573650
2	DALYs (Disability-Adjusted Life Years)	44634	High-middle SDI	2	Female	18	65-69 years	1048	COVID-19	1	Number	2020	731377	808462	659989
2	DALYs (Disability-Adjusted Life Years)	44634	High-middle SDI	2	Female	19	70-74 years	1048	COVID-19	1	Number	2020	718048	789994	649042
2	DALYs (Disability-Adjusted Life Years)	44634	High-middle SDI	2	Female	20	75-79 years	1048	COVID-19	1	Number	2020	539809	593745	491263
2	DALYs (Disability-Adjusted Life Years)	44634	High-middle SDI	2	Female	30	80-84 years	1048	COVID-19	1	Number	2020	677715	741437	624172
2	DALYs (Disability-Adjusted Life Years)	44634	High-middle SDI	2	Female	31	85-89 years	1048	COVID-19	1	Number	2020	463835	504677	427641
2	DALYs (Disability-Adjusted Life Years)	44634	High-middle SDI	2	Female	32	90-94 years	1048	COVID-19	1	Number	2020	321495	344857	301289
2	DALYs (Disability-Adjusted Life Years)	44634	High-middle SDI	2	Female	235	95+ years	1048	COVID-19	1	Number	2020	134829	143922	126758
2	DALYs (Disability-Adjusted Life Years)	44634	High-middle SDI	3	Both	1	<5 years	1048	COVID-19	1	Number	2020	39399.9	51772.9	33386.8
2	DALYs (Disability-Adjusted Life Years)	44634	High-middle SDI	3	Both	6	5-9 years	1048	COVID-19	1	Number	2020	35852.4	59779.1	25519.8
2	DALYs (Disability-Adjusted Life Years)	44634	High-middle SDI	3	Both	7	10-14 years	1048	COVID-19	1	Number	2020	40806	65626.5	29738.7
2	DALYs (Disability-Adjusted Life Years)	44634	High-middle SDI	3	Both	8	15-19 years	1048	COVID-19	1	Number	2020	64474.2	89675.2	53197.8
2	DALYs (Disability-Adjusted Life Years)	44634	High-middle SDI	3	Both	9	20-24 years	1048	COVID-19	1	Number	2020	111311	162468	86376.1
2	DALYs (Disability-Adjusted Life Years)	44634	High-middle SDI	3	Both	10	25-29 years	1048	COVID-19	1	Number	2020	200475	254979	170576
2	DALYs (Disability-Adjusted Life Years)	44634	High-middle SDI	3	Both	11	30-34 years	1048	COVID-19	1	Number	2020	371740	434292	329258
2	DALYs (Disability-Adjusted Life Years)	44634	High-middle SDI	3	Both	12	35-39 years	1048	COVID-19	1	Number	2020	503301	567785	449593
2	DALYs (Disability-Adjusted Life Years)	44634	High-middle SDI	3	Both	13	40-44 years	1048	COVID-19	1	Number	2020	749612	829383	673842
2	DALYs (Disability-Adjusted Life Years)	44634	High-middle SDI	3	Both	14	45-49 years	1048	COVID-19	1	Number	2020	891791	980968	803801
2	DALYs (Disability-Adjusted Life Years)	44634	High-middle SDI	3	Both	15	50-54 years	1048	COVID-19	1	Number	2020	1.03602e+06	1.14096e+06	933956
2	DALYs (Disability-Adjusted Life Years)	44634	High-middle SDI	3	Both	16	55-59 years	1048	COVID-19	1	Number	2020	1.37689e+06	1.5129e+06	1.24689e+06
2	DALYs (Disability-Adjusted Life Years)	44634	High-middle SDI	3	Both	17	60-64 years	1048	COVID-19	1	Number	2020	1.78948e+06	1.96404e+06	1.62817e+06
2	DALYs (Disability-Adjusted Life Years)	44634	High-middle SDI	3	Both	18	65-69 years	1048	COVID-19	1	Number	2020	1.98165e+06	2.18034e+06	1.80189e+06
2	DALYs (Disability-Adjusted Life Years)	44634	High-middle SDI	3	Both	19	70-74 years	1048	COVID-19	1	Number	2020	1.80444e+06	1.97489e+06	1.65012e+06
2	DALYs (Disability-Adjusted Life Years)	44634	High-middle SDI	3	Both	20	75-79 years	1048	COVID-19	1	Number	2020	1.26718e+06	1.38035e+06	1.16599e+06
2	DALYs (Disability-Adjusted Life Years)	44634	High-middle SDI	3	Both	30	80-84 years	1048	COVID-19	1	Number	2020	1.32158e+06	1.43263e+06	1.22862e+06
2	DALYs (Disability-Adjusted Life Years)	44634	High-middle SDI	3	Both	31	85-89 years	1048	COVID-19	1	Number	2020	882147	953823	820134
2	DALYs (Disability-Adjusted Life Years)	44634	High-middle SDI	3	Both	32	90-94 years	1048	COVID-19	1	Number	2020	531211	568492	499110
2	DALYs (Disability-Adjusted Life Years)	44634	High-middle SDI	3	Both	235	95+ years	1048	COVID-19	1	Number	2020	193088	206035	181093
2	DALYs (Disability-Adjusted Life Years)	44635	High SDI	1	Male	1	<5 years	1048	COVID-19	1	Number	2020	11632.9	16563.1	7687.35
2	DALYs (Disability-Adjusted Life Years)	44635	High SDI	1	Male	6	5-9 years	1048	COVID-19	1	Number	2020	9955.38	17407.2	6930.49
2	DALYs (Disability-Adjusted Life Years)	44635	High SDI	1	Male	7	10-14 years	1048	COVID-19	1	Number	2020	12895.1	21585.4	9349.35
2	DALYs (Disability-Adjusted Life Years)	44635	High SDI	1	Male	8	15-19 years	1048	COVID-19	1	Number	2020	124310	134978	117711
2	DALYs (Disability-Adjusted Life Years)	44635	High SDI	1	Male	9	20-24 years	1048	COVID-19	1	Number	2020	217819	232924	207195
2	DALYs (Disability-Adjusted Life Years)	44635	High SDI	1	Male	10	25-29 years	1048	COVID-19	1	Number	2020	306569	323879	293475
2	DALYs (Disability-Adjusted Life Years)	44635	High SDI	1	Male	11	30-34 years	1048	COVID-19	1	Number	2020	431931	456602	412706
2	DALYs (Disability-Adjusted Life Years)	44635	High SDI	1	Male	12	35-39 years	1048	COVID-19	1	Number	2020	486379	514523	463874
2	DALYs (Disability-Adjusted Life Years)	44635	High SDI	1	Male	13	40-44 years	1048	COVID-19	1	Number	2020	544584	568018	518256
2	DALYs (Disability-Adjusted Life Years)	44635	High SDI	1	Male	14	45-49 years	1048	COVID-19	1	Number	2020	618814	643632	590406
2	DALYs (Disability-Adjusted Life Years)	44635	High SDI	1	Male	15	50-54 years	1048	COVID-19	1	Number	2020	720887	748058	689335
2	DALYs (Disability-Adjusted Life Years)	44635	High SDI	1	Male	16	55-59 years	1048	COVID-19	1	Number	2020	898376	933515	860385
2	DALYs (Disability-Adjusted Life Years)	44635	High SDI	1	Male	17	60-64 years	1048	COVID-19	1	Number	2020	1.10096e+06	1.14577e+06	1.05351e+06
2	DALYs (Disability-Adjusted Life Years)	44635	High SDI	1	Male	18	65-69 years	1048	COVID-19	1	Number	2020	1.1514e+06	1.19973e+06	1.09842e+06
2	DALYs (Disability-Adjusted Life Years)	44635	High SDI	1	Male	19	70-74 years	1048	COVID-19	1	Number	2020	1.07438e+06	1.11703e+06	1.02859e+06
2	DALYs (Disability-Adjusted Life Years)	44635	High SDI	1	Male	20	75-79 years	1048	COVID-19	1	Number	2020	906654	939071	871213
2	DALYs (Disability-Adjusted Life Years)	44635	High SDI	1	Male	30	80-84 years	1048	COVID-19	1	Number	2020	733431	760615	704649
2	DALYs (Disability-Adjusted Life Years)	44635	High SDI	1	Male	31	85-89 years	1048	COVID-19	1	Number	2020	508133	525560	490329
2	DALYs (Disability-Adjusted Life Years)	44635	High SDI	1	Male	32	90-94 years	1048	COVID-19	1	Number	2020	293089	302691	282997
2	DALYs (Disability-Adjusted Life Years)	44635	High SDI	1	Male	235	95+ years	1048	COVID-19	1	Number	2020	107179	110839	103250
2	DALYs (Disability-Adjusted Life Years)	44635	High SDI	2	Female	1	<5 years	1048	COVID-19	1	Number	2020	9242.08	13853.4	6221.1
2	DALYs (Disability-Adjusted Life Years)	44635	High SDI	2	Female	6	5-9 years	1048	COVID-19	1	Number	2020	7761.24	14572.7	4954.81
2	DALYs (Disability-Adjusted Life Years)	44635	High SDI	2	Female	7	10-14 years	1048	COVID-19	1	Number	2020	12838.6	20824.1	9606.79
2	DALYs (Disability-Adjusted Life Years)	44635	High SDI	2	Female	8	15-19 years	1048	COVID-19	1	Number	2020	43854.4	52595.8	39942.1
2	DALYs (Disability-Adjusted Life Years)	44635	High SDI	2	Female	9	20-24 years	1048	COVID-19	1	Number	2020	84337.2	107737	72334.3
2	DALYs (Disability-Adjusted Life Years)	44635	High SDI	2	Female	10	25-29 years	1048	COVID-19	1	Number	2020	136925	160642	123994
2	DALYs (Disability-Adjusted Life Years)	44635	High SDI	2	Female	11	30-34 years	1048	COVID-19	1	Number	2020	170421	193278	157329
2	DALYs (Disability-Adjusted Life Years)	44635	High SDI	2	Female	12	35-39 years	1048	COVID-19	1	Number	2020	204057	226511	189978
2	DALYs (Disability-Adjusted Life Years)	44635	High SDI	2	Female	13	40-44 years	1048	COVID-19	1	Number	2020	245930	268591	231143
2	DALYs (Disability-Adjusted Life Years)	44635	High SDI	2	Female	14	45-49 years	1048	COVID-19	1	Number	2020	283012	305200	267385
2	DALYs (Disability-Adjusted Life Years)	44635	High SDI	2	Female	15	50-54 years	1048	COVID-19	1	Number	2020	332962	355198	315747
2	DALYs (Disability-Adjusted Life Years)	44635	High SDI	2	Female	16	55-59 years	1048	COVID-19	1	Number	2020	429433	451797	409723
2	DALYs (Disability-Adjusted Life Years)	44635	High SDI	2	Female	17	60-64 years	1048	COVID-19	1	Number	2020	566577	590539	543503
2	DALYs (Disability-Adjusted Life Years)	44635	High SDI	2	Female	18	65-69 years	1048	COVID-19	1	Number	2020	645096	671590	619438
2	DALYs (Disability-Adjusted Life Years)	44635	High SDI	2	Female	19	70-74 years	1048	COVID-19	1	Number	2020	648437	674311	623396
2	DALYs (Disability-Adjusted Life Years)	44635	High SDI	2	Female	20	75-79 years	1048	COVID-19	1	Number	2020	621348	641812	599508
2	DALYs (Disability-Adjusted Life Years)	44635	High SDI	2	Female	30	80-84 years	1048	COVID-19	1	Number	2020	603114	623997	581264
2	DALYs (Disability-Adjusted Life Years)	44635	High SDI	2	Female	31	85-89 years	1048	COVID-19	1	Number	2020	567837	587376	548326
2	DALYs (Disability-Adjusted Life Years)	44635	High SDI	2	Female	32	90-94 years	1048	COVID-19	1	Number	2020	457015	471959	441551
2	DALYs (Disability-Adjusted Life Years)	44635	High SDI	2	Female	235	95+ years	1048	COVID-19	1	Number	2020	268088	276193	259050
2	DALYs (Disability-Adjusted Life Years)	44635	High SDI	3	Both	1	<5 years	1048	COVID-19	1	Number	2020	20875	28990.4	14544
2	DALYs (Disability-Adjusted Life Years)	44635	High SDI	3	Both	6	5-9 years	1048	COVID-19	1	Number	2020	17716.6	31899.8	11993.4
2	DALYs (Disability-Adjusted Life Years)	44635	High SDI	3	Both	7	10-14 years	1048	COVID-19	1	Number	2020	25733.6	42409.5	19004.2
2	DALYs (Disability-Adjusted Life Years)	44635	High SDI	3	Both	8	15-19 years	1048	COVID-19	1	Number	2020	168164	187871	157701
2	DALYs (Disability-Adjusted Life Years)	44635	High SDI	3	Both	9	20-24 years	1048	COVID-19	1	Number	2020	302156	340124	279682
2	DALYs (Disability-Adjusted Life Years)	44635	High SDI	3	Both	10	25-29 years	1048	COVID-19	1	Number	2020	443494	482970	418524
2	DALYs (Disability-Adjusted Life Years)	44635	High SDI	3	Both	11	30-34 years	1048	COVID-19	1	Number	2020	602352	648561	571035
2	DALYs (Disability-Adjusted Life Years)	44635	High SDI	3	Both	12	35-39 years	1048	COVID-19	1	Number	2020	690436	736747	655036
2	DALYs (Disability-Adjusted Life Years)	44635	High SDI	3	Both	13	40-44 years	1048	COVID-19	1	Number	2020	790514	833125	752340
2	DALYs (Disability-Adjusted Life Years)	44635	High SDI	3	Both	14	45-49 years	1048	COVID-19	1	Number	2020	901826	945154	860693
2	DALYs (Disability-Adjusted Life Years)	44635	High SDI	3	Both	15	50-54 years	1048	COVID-19	1	Number	2020	1.05385e+06	1.09782e+06	1.01088e+06
2	DALYs (Disability-Adjusted Life Years)	44635	High SDI	3	Both	16	55-59 years	1048	COVID-19	1	Number	2020	1.32781e+06	1.37751e+06	1.27303e+06
2	DALYs (Disability-Adjusted Life Years)	44635	High SDI	3	Both	17	60-64 years	1048	COVID-19	1	Number	2020	1.66754e+06	1.72919e+06	1.59814e+06
2	DALYs (Disability-Adjusted Life Years)	44635	High SDI	3	Both	18	65-69 years	1048	COVID-19	1	Number	2020	1.7965e+06	1.86697e+06	1.72118e+06
2	DALYs (Disability-Adjusted Life Years)	44635	High SDI	3	Both	19	70-74 years	1048	COVID-19	1	Number	2020	1.72281e+06	1.78852e+06	1.65279e+06
2	DALYs (Disability-Adjusted Life Years)	44635	High SDI	3	Both	20	75-79 years	1048	COVID-19	1	Number	2020	1.528e+06	1.57983e+06	1.47207e+06
2	DALYs (Disability-Adjusted Life Years)	44635	High SDI	3	Both	30	80-84 years	1048	COVID-19	1	Number	2020	1.33655e+06	1.38281e+06	1.28929e+06
2	DALYs (Disability-Adjusted Life Years)	44635	High SDI	3	Both	31	85-89 years	1048	COVID-19	1	Number	2020	1.07597e+06	1.11244e+06	1.03891e+06
2	DALYs (Disability-Adjusted Life Years)	44635	High SDI	3	Both	32	90-94 years	1048	COVID-19	1	Number	2020	750104	772906	725788
2	DALYs (Disability-Adjusted Life Years)	44635	High SDI	3	Both	235	95+ years	1048	COVID-19	1	Number	2020	375267	386966	362755
2	DALYs (Disability-Adjusted Life Years)	44636	Low-middle SDI	1	Male	1	<5 years	1048	COVID-19	1	Number	2020	200163	247751	176769
2	DALYs (Disability-Adjusted Life Years)	44636	Low-middle SDI	1	Male	6	5-9 years	1048	COVID-19	1	Number	2020	177421	267684	126836
2	DALYs (Disability-Adjusted Life Years)	44636	Low-middle SDI	1	Male	7	10-14 years	1048	COVID-19	1	Number	2020	211139	294438	156831
2	DALYs (Disability-Adjusted Life Years)	44636	Low-middle SDI	1	Male	8	15-19 years	1048	COVID-19	1	Number	2020	275102	368575	236685
2	DALYs (Disability-Adjusted Life Years)	44636	Low-middle SDI	1	Male	9	20-24 years	1048	COVID-19	1	Number	2020	420336	550165	360769
2	DALYs (Disability-Adjusted Life Years)	44636	Low-middle SDI	1	Male	10	25-29 years	1048	COVID-19	1	Number	2020	746069	866278	677817
2	DALYs (Disability-Adjusted Life Years)	44636	Low-middle SDI	1	Male	11	30-34 years	1048	COVID-19	1	Number	2020	1.21047e+06	1.33965e+06	1.12155e+06
2	DALYs (Disability-Adjusted Life Years)	44636	Low-middle SDI	1	Male	12	35-39 years	1048	COVID-19	1	Number	2020	1.46821e+06	1.59927e+06	1.36628e+06
2	DALYs (Disability-Adjusted Life Years)	44636	Low-middle SDI	1	Male	13	40-44 years	1048	COVID-19	1	Number	2020	1.9207e+06	2.06246e+06	1.7915e+06
2	DALYs (Disability-Adjusted Life Years)	44636	Low-middle SDI	1	Male	14	45-49 years	1048	COVID-19	1	Number	2020	2.07487e+06	2.22795e+06	1.93645e+06
2	DALYs (Disability-Adjusted Life Years)	44636	Low-middle SDI	1	Male	15	50-54 years	1048	COVID-19	1	Number	2020	2.20551e+06	2.36426e+06	2.05651e+06
2	DALYs (Disability-Adjusted Life Years)	44636	Low-middle SDI	1	Male	16	55-59 years	1048	COVID-19	1	Number	2020	2.46668e+06	2.64954e+06	2.2984e+06
2	DALYs (Disability-Adjusted Life Years)	44636	Low-middle SDI	1	Male	17	60-64 years	1048	COVID-19	1	Number	2020	2.83609e+06	3.04563e+06	2.64613e+06
2	DALYs (Disability-Adjusted Life Years)	44636	Low-middle SDI	1	Male	18	65-69 years	1048	COVID-19	1	Number	2020	2.91726e+06	3.12122e+06	2.72144e+06
2	DALYs (Disability-Adjusted Life Years)	44636	Low-middle SDI	1	Male	19	70-74 years	1048	COVID-19	1	Number	2020	2.41517e+06	2.57733e+06	2.25022e+06
2	DALYs (Disability-Adjusted Life Years)	44636	Low-middle SDI	1	Male	20	75-79 years	1048	COVID-19	1	Number	2020	1.70115e+06	1.81394e+06	1.58818e+06
2	DALYs (Disability-Adjusted Life Years)	44636	Low-middle SDI	1	Male	30	80-84 years	1048	COVID-19	1	Number	2020	1.1319e+06	1.20741e+06	1.05951e+06
2	DALYs (Disability-Adjusted Life Years)	44636	Low-middle SDI	1	Male	31	85-89 years	1048	COVID-19	1	Number	2020	537586	574492	502739
2	DALYs (Disability-Adjusted Life Years)	44636	Low-middle SDI	1	Male	32	90-94 years	1048	COVID-19	1	Number	2020	258486	275542	241080
2	DALYs (Disability-Adjusted Life Years)	44636	Low-middle SDI	1	Male	235	95+ years	1048	COVID-19	1	Number	2020	83731	89134.2	77983.3
2	DALYs (Disability-Adjusted Life Years)	44636	Low-middle SDI	2	Female	1	<5 years	1048	COVID-19	1	Number	2020	171671	217552	149992
2	DALYs (Disability-Adjusted Life Years)	44636	Low-middle SDI	2	Female	6	5-9 years	1048	COVID-19	1	Number	2020	134452	218827	84359.9
2	DALYs (Disability-Adjusted Life Years)	44636	Low-middle SDI	2	Female	7	10-14 years	1048	COVID-19	1	Number	2020	144884	233961	94084.6
2	DALYs (Disability-Adjusted Life Years)	44636	Low-middle SDI	2	Female	8	15-19 years	1048	COVID-19	1	Number	2020	255121	343293	219109
2	DALYs (Disability-Adjusted Life Years)	44636	Low-middle SDI	2	Female	9	20-24 years	1048	COVID-19	1	Number	2020	402756	620243	298200
2	DALYs (Disability-Adjusted Life Years)	44636	Low-middle SDI	2	Female	10	25-29 years	1048	COVID-19	1	Number	2020	504432	698776	405917
2	DALYs (Disability-Adjusted Life Years)	44636	Low-middle SDI	2	Female	11	30-34 years	1048	COVID-19	1	Number	2020	618382	792415	528412
2	DALYs (Disability-Adjusted Life Years)	44636	Low-middle SDI	2	Female	12	35-39 years	1048	COVID-19	1	Number	2020	760603	913107	677001
2	DALYs (Disability-Adjusted Life Years)	44636	Low-middle SDI	2	Female	13	40-44 years	1048	COVID-19	1	Number	2020	952640	1.08715e+06	868721
2	DALYs (Disability-Adjusted Life Years)	44636	Low-middle SDI	2	Female	14	45-49 years	1048	COVID-19	1	Number	2020	1.02306e+06	1.14724e+06	941944
2	DALYs (Disability-Adjusted Life Years)	44636	Low-middle SDI	2	Female	15	50-54 years	1048	COVID-19	1	Number	2020	1.02327e+06	1.13373e+06	944572
2	DALYs (Disability-Adjusted Life Years)	44636	Low-middle SDI	2	Female	16	55-59 years	1048	COVID-19	1	Number	2020	1.13653e+06	1.23832e+06	1.05509e+06
2	DALYs (Disability-Adjusted Life Years)	44636	Low-middle SDI	2	Female	17	60-64 years	1048	COVID-19	1	Number	2020	1.37366e+06	1.47759e+06	1.28035e+06
2	DALYs (Disability-Adjusted Life Years)	44636	Low-middle SDI	2	Female	18	65-69 years	1048	COVID-19	1	Number	2020	1.41484e+06	1.51495e+06	1.32326e+06
2	DALYs (Disability-Adjusted Life Years)	44636	Low-middle SDI	2	Female	19	70-74 years	1048	COVID-19	1	Number	2020	1.28085e+06	1.36552e+06	1.20156e+06
2	DALYs (Disability-Adjusted Life Years)	44636	Low-middle SDI	2	Female	20	75-79 years	1048	COVID-19	1	Number	2020	922026	983271	865831
2	DALYs (Disability-Adjusted Life Years)	44636	Low-middle SDI	2	Female	30	80-84 years	1048	COVID-19	1	Number	2020	742147	790560	697645
2	DALYs (Disability-Adjusted Life Years)	44636	Low-middle SDI	2	Female	31	85-89 years	1048	COVID-19	1	Number	2020	403533	430250	379439
2	DALYs (Disability-Adjusted Life Years)	44636	Low-middle SDI	2	Female	32	90-94 years	1048	COVID-19	1	Number	2020	214877	228414	202450
2	DALYs (Disability-Adjusted Life Years)	44636	Low-middle SDI	2	Female	235	95+ years	1048	COVID-19	1	Number	2020	82999.4	88133.7	78280.8
2	DALYs (Disability-Adjusted Life Years)	44636	Low-middle SDI	3	Both	1	<5 years	1048	COVID-19	1	Number	2020	371834	466625	327178
2	DALYs (Disability-Adjusted Life Years)	44636	Low-middle SDI	3	Both	6	5-9 years	1048	COVID-19	1	Number	2020	311873	486660	212429
2	DALYs (Disability-Adjusted Life Years)	44636	Low-middle SDI	3	Both	7	10-14 years	1048	COVID-19	1	Number	2020	356022	526987	250250
2	DALYs (Disability-Adjusted Life Years)	44636	Low-middle SDI	3	Both	8	15-19 years	1048	COVID-19	1	Number	2020	530223	712398	455381
2	DALYs (Disability-Adjusted Life Years)	44636	Low-middle SDI	3	Both	9	20-24 years	1048	COVID-19	1	Number	2020	823093	1.18606e+06	661700
2	DALYs (Disability-Adjusted Life Years)	44636	Low-middle SDI	3	Both	10	25-29 years	1048	COVID-19	1	Number	2020	1.2505e+06	1.56961e+06	1.09041e+06
2	DALYs (Disability-Adjusted Life Years)	44636	Low-middle SDI	3	Both	11	30-34 years	1048	COVID-19	1	Number	2020	1.82885e+06	2.11809e+06	1.65708e+06
2	DALYs (Disability-Adjusted Life Years)	44636	Low-middle SDI	3	Both	12	35-39 years	1048	COVID-19	1	Number	2020	2.22882e+06	2.50377e+06	2.04724e+06
2	DALYs (Disability-Adjusted Life Years)	44636	Low-middle SDI	3	Both	13	40-44 years	1048	COVID-19	1	Number	2020	2.87334e+06	3.13757e+06	2.66617e+06
2	DALYs (Disability-Adjusted Life Years)	44636	Low-middle SDI	3	Both	14	45-49 years	1048	COVID-19	1	Number	2020	3.09793e+06	3.35201e+06	2.8795e+06
2	DALYs (Disability-Adjusted Life Years)	44636	Low-middle SDI	3	Both	15	50-54 years	1048	COVID-19	1	Number	2020	3.22878e+06	3.48123e+06	2.99993e+06
2	DALYs (Disability-Adjusted Life Years)	44636	Low-middle SDI	3	Both	16	55-59 years	1048	COVID-19	1	Number	2020	3.60321e+06	3.86858e+06	3.35117e+06
2	DALYs (Disability-Adjusted Life Years)	44636	Low-middle SDI	3	Both	17	60-64 years	1048	COVID-19	1	Number	2020	4.20975e+06	4.52625e+06	3.92375e+06
2	DALYs (Disability-Adjusted Life Years)	44636	Low-middle SDI	3	Both	18	65-69 years	1048	COVID-19	1	Number	2020	4.3321e+06	4.64264e+06	4.04715e+06
2	DALYs (Disability-Adjusted Life Years)	44636	Low-middle SDI	3	Both	19	70-74 years	1048	COVID-19	1	Number	2020	3.69602e+06	3.93927e+06	3.45612e+06
2	DALYs (Disability-Adjusted Life Years)	44636	Low-middle SDI	3	Both	20	75-79 years	1048	COVID-19	1	Number	2020	2.62317e+06	2.79629e+06	2.45396e+06
2	DALYs (Disability-Adjusted Life Years)	44636	Low-middle SDI	3	Both	30	80-84 years	1048	COVID-19	1	Number	2020	1.87404e+06	1.99907e+06	1.75908e+06
2	DALYs (Disability-Adjusted Life Years)	44636	Low-middle SDI	3	Both	31	85-89 years	1048	COVID-19	1	Number	2020	941119	1.00449e+06	883170
2	DALYs (Disability-Adjusted Life Years)	44636	Low-middle SDI	3	Both	32	90-94 years	1048	COVID-19	1	Number	2020	473363	504327	444126
2	DALYs (Disability-Adjusted Life Years)	44636	Low-middle SDI	3	Both	235	95+ years	1048	COVID-19	1	Number	2020	166730	176646	156432
2	DALYs (Disability-Adjusted Life Years)	44637	Low SDI	1	Male	1	<5 years	1048	COVID-19	1	Number	2020	180853	223124	160028
2	DALYs (Disability-Adjusted Life Years)	44637	Low SDI	1	Male	6	5-9 years	1048	COVID-19	1	Number	2020	135702	204883	98063.6
2	DALYs (Disability-Adjusted Life Years)	44637	Low SDI	1	Male	7	10-14 years	1048	COVID-19	1	Number	2020	152362	215407	116891
2	DALYs (Disability-Adjusted Life Years)	44637	Low SDI	1	Male	8	15-19 years	1048	COVID-19	1	Number	2020	210471	267580	182541
2	DALYs (Disability-Adjusted Life Years)	44637	Low SDI	1	Male	9	20-24 years	1048	COVID-19	1	Number	2020	279649	354889	241737
2	DALYs (Disability-Adjusted Life Years)	44637	Low SDI	1	Male	10	25-29 years	1048	COVID-19	1	Number	2020	469754	540151	427778
2	DALYs (Disability-Adjusted Life Years)	44637	Low SDI	1	Male	11	30-34 years	1048	COVID-19	1	Number	2020	721897	790582	668201
2	DALYs (Disability-Adjusted Life Years)	44637	Low SDI	1	Male	12	35-39 years	1048	COVID-19	1	Number	2020	843994	918489	787424
2	DALYs (Disability-Adjusted Life Years)	44637	Low SDI	1	Male	13	40-44 years	1048	COVID-19	1	Number	2020	1.09233e+06	1.18368e+06	1.02494e+06
2	DALYs (Disability-Adjusted Life Years)	44637	Low SDI	1	Male	14	45-49 years	1048	COVID-19	1	Number	2020	1.1536e+06	1.25211e+06	1.08117e+06
2	DALYs (Disability-Adjusted Life Years)	44637	Low SDI	1	Male	15	50-54 years	1048	COVID-19	1	Number	2020	1.13165e+06	1.22804e+06	1.06356e+06
2	DALYs (Disability-Adjusted Life Years)	44637	Low SDI	1	Male	16	55-59 years	1048	COVID-19	1	Number	2020	1.15217e+06	1.24544e+06	1.08377e+06
2	DALYs (Disability-Adjusted Life Years)	44637	Low SDI	1	Male	17	60-64 years	1048	COVID-19	1	Number	2020	1.24584e+06	1.34229e+06	1.17125e+06
2	DALYs (Disability-Adjusted Life Years)	44637	Low SDI	1	Male	18	65-69 years	1048	COVID-19	1	Number	2020	1.27129e+06	1.36362e+06	1.19957e+06
2	DALYs (Disability-Adjusted Life Years)	44637	Low SDI	1	Male	19	70-74 years	1048	COVID-19	1	Number	2020	981603	1.05012e+06	929283
2	DALYs (Disability-Adjusted Life Years)	44637	Low SDI	1	Male	20	75-79 years	1048	COVID-19	1	Number	2020	702118	752762	666353
2	DALYs (Disability-Adjusted Life Years)	44637	Low SDI	1	Male	30	80-84 years	1048	COVID-19	1	Number	2020	448323	481469	424921
2	DALYs (Disability-Adjusted Life Years)	44637	Low SDI	1	Male	31	85-89 years	1048	COVID-19	1	Number	2020	213404	229061	202358
2	DALYs (Disability-Adjusted Life Years)	44637	Low SDI	1	Male	32	90-94 years	1048	COVID-19	1	Number	2020	91152.5	97690.8	86520.8
2	DALYs (Disability-Adjusted Life Years)	44637	Low SDI	1	Male	235	95+ years	1048	COVID-19	1	Number	2020	22990.7	24770	21755.3
2	DALYs (Disability-Adjusted Life Years)	44637	Low SDI	2	Female	1	<5 years	1048	COVID-19	1	Number	2020	157310	197095	138202
2	DALYs (Disability-Adjusted Life Years)	44637	Low SDI	2	Female	6	5-9 years	1048	COVID-19	1	Number	2020	108672	175423	68328.6
2	DALYs (Disability-Adjusted Life Years)	44637	Low SDI	2	Female	7	10-14 years	1048	COVID-19	1	Number	2020	110003	172702	67015.6
2	DALYs (Disability-Adjusted Life Years)	44637	Low SDI	2	Female	8	15-19 years	1048	COVID-19	1	Number	2020	210181	268063	183079
2	DALYs (Disability-Adjusted Life Years)	44637	Low SDI	2	Female	9	20-24 years	1048	COVID-19	1	Number	2020	283568	414815	216782
2	DALYs (Disability-Adjusted Life Years)	44637	Low SDI	2	Female	10	25-29 years	1048	COVID-19	1	Number	2020	334689	443632	276237
2	DALYs (Disability-Adjusted Life Years)	44637	Low SDI	2	Female	11	30-34 years	1048	COVID-19	1	Number	2020	382505	475131	331777
2	DALYs (Disability-Adjusted Life Years)	44637	Low SDI	2	Female	12	35-39 years	1048	COVID-19	1	Number	2020	453892	534515	404805
2	DALYs (Disability-Adjusted Life Years)	44637	Low SDI	2	Female	13	40-44 years	1048	COVID-19	1	Number	2020	542840	610980	495631
2	DALYs (Disability-Adjusted Life Years)	44637	Low SDI	2	Female	14	45-49 years	1048	COVID-19	1	Number	2020	550409	613359	504948
2	DALYs (Disability-Adjusted Life Years)	44637	Low SDI	2	Female	15	50-54 years	1048	COVID-19	1	Number	2020	513443	565461	472427
2	DALYs (Disability-Adjusted Life Years)	44637	Low SDI	2	Female	16	55-59 years	1048	COVID-19	1	Number	2020	524436	570655	487346
2	DALYs (Disability-Adjusted Life Years)	44637	Low SDI	2	Female	17	60-64 years	1048	COVID-19	1	Number	2020	590993	639181	553455
2	DALYs (Disability-Adjusted Life Years)	44637	Low SDI	2	Female	18	65-69 years	1048	COVID-19	1	Number	2020	607793	655425	572193
2	DALYs (Disability-Adjusted Life Years)	44637	Low SDI	2	Female	19	70-74 years	1048	COVID-19	1	Number	2020	503042	541073	476272
2	DALYs (Disability-Adjusted Life Years)	44637	Low SDI	2	Female	20	75-79 years	1048	COVID-19	1	Number	2020	374670	403115	354690
2	DALYs (Disability-Adjusted Life Years)	44637	Low SDI	2	Female	30	80-84 years	1048	COVID-19	1	Number	2020	273228	293569	258931
2	DALYs (Disability-Adjusted Life Years)	44637	Low SDI	2	Female	31	85-89 years	1048	COVID-19	1	Number	2020	147589	158123	139571
2	DALYs (Disability-Adjusted Life Years)	44637	Low SDI	2	Female	32	90-94 years	1048	COVID-19	1	Number	2020	75594.9	80819.1	71320.5
2	DALYs (Disability-Adjusted Life Years)	44637	Low SDI	2	Female	235	95+ years	1048	COVID-19	1	Number	2020	26738.4	28639.4	25165.1
2	DALYs (Disability-Adjusted Life Years)	44637	Low SDI	3	Both	1	<5 years	1048	COVID-19	1	Number	2020	338163	420219	298246
2	DALYs (Disability-Adjusted Life Years)	44637	Low SDI	3	Both	6	5-9 years	1048	COVID-19	1	Number	2020	244374	381649	166849
2	DALYs (Disability-Adjusted Life Years)	44637	Low SDI	3	Both	7	10-14 years	1048	COVID-19	1	Number	2020	262365	389377	180671
2	DALYs (Disability-Adjusted Life Years)	44637	Low SDI	3	Both	8	15-19 years	1048	COVID-19	1	Number	2020	420651	535770	365331
2	DALYs (Disability-Adjusted Life Years)	44637	Low SDI	3	Both	9	20-24 years	1048	COVID-19	1	Number	2020	563217	766974	460358
2	DALYs (Disability-Adjusted Life Years)	44637	Low SDI	3	Both	10	25-29 years	1048	COVID-19	1	Number	2020	804443	984439	705048
2	DALYs (Disability-Adjusted Life Years)	44637	Low SDI	3	Both	11	30-34 years	1048	COVID-19	1	Number	2020	1.1044e+06	1.26051e+06	1.00415e+06
2	DALYs (Disability-Adjusted Life Years)	44637	Low SDI	3	Both	12	35-39 years	1048	COVID-19	1	Number	2020	1.29789e+06	1.44462e+06	1.196e+06
2	DALYs (Disability-Adjusted Life Years)	44637	Low SDI	3	Both	13	40-44 years	1048	COVID-19	1	Number	2020	1.63517e+06	1.77919e+06	1.51686e+06
2	DALYs (Disability-Adjusted Life Years)	44637	Low SDI	3	Both	14	45-49 years	1048	COVID-19	1	Number	2020	1.70401e+06	1.85719e+06	1.58228e+06
2	DALYs (Disability-Adjusted Life Years)	44637	Low SDI	3	Both	15	50-54 years	1048	COVID-19	1	Number	2020	1.64509e+06	1.78759e+06	1.53792e+06
2	DALYs (Disability-Adjusted Life Years)	44637	Low SDI	3	Both	16	55-59 years	1048	COVID-19	1	Number	2020	1.6766e+06	1.81411e+06	1.57673e+06
2	DALYs (Disability-Adjusted Life Years)	44637	Low SDI	3	Both	17	60-64 years	1048	COVID-19	1	Number	2020	1.83683e+06	1.97827e+06	1.72662e+06
2	DALYs (Disability-Adjusted Life Years)	44637	Low SDI	3	Both	18	65-69 years	1048	COVID-19	1	Number	2020	1.87908e+06	2.01946e+06	1.77841e+06
2	DALYs (Disability-Adjusted Life Years)	44637	Low SDI	3	Both	19	70-74 years	1048	COVID-19	1	Number	2020	1.48465e+06	1.5921e+06	1.40764e+06
2	DALYs (Disability-Adjusted Life Years)	44637	Low SDI	3	Both	20	75-79 years	1048	COVID-19	1	Number	2020	1.07679e+06	1.15568e+06	1.02088e+06
2	DALYs (Disability-Adjusted Life Years)	44637	Low SDI	3	Both	30	80-84 years	1048	COVID-19	1	Number	2020	721551	774670	684289
2	DALYs (Disability-Adjusted Life Years)	44637	Low SDI	3	Both	31	85-89 years	1048	COVID-19	1	Number	2020	360993	387235	342197
2	DALYs (Disability-Adjusted Life Years)	44637	Low SDI	3	Both	32	90-94 years	1048	COVID-19	1	Number	2020	166747	178456	157908
2	DALYs (Disability-Adjusted Life Years)	44637	Low SDI	3	Both	235	95+ years	1048	COVID-19	1	Number	2020	49729.1	53351.5	46902
2	DALYs (Disability-Adjusted Life Years)	44639	Middle SDI	1	Male	1	<5 years	1048	COVID-19	1	Number	2020	126124	155179	108076
2	DALYs (Disability-Adjusted Life Years)	44639	Middle SDI	1	Male	6	5-9 years	1048	COVID-19	1	Number	2020	129980	183978	104422
2	DALYs (Disability-Adjusted Life Years)	44639	Middle SDI	1	Male	7	10-14 years	1048	COVID-19	1	Number	2020	128722	180354	102489
2	DALYs (Disability-Adjusted Life Years)	44639	Middle SDI	1	Male	8	15-19 years	1048	COVID-19	1	Number	2020	161218	216828	125846
2	DALYs (Disability-Adjusted Life Years)	44639	Middle SDI	1	Male	9	20-24 years	1048	COVID-19	1	Number	2020	246417	328239	193850
2	DALYs (Disability-Adjusted Life Years)	44639	Middle SDI	1	Male	10	25-29 years	1048	COVID-19	1	Number	2020	494905	584644	430460
2	DALYs (Disability-Adjusted Life Years)	44639	Middle SDI	1	Male	11	30-34 years	1048	COVID-19	1	Number	2020	843009	946829	763650
2	DALYs (Disability-Adjusted Life Years)	44639	Middle SDI	1	Male	12	35-39 years	1048	COVID-19	1	Number	2020	1.08504e+06	1.19899e+06	987372
2	DALYs (Disability-Adjusted Life Years)	44639	Middle SDI	1	Male	13	40-44 years	1048	COVID-19	1	Number	2020	1.50288e+06	1.65897e+06	1.36624e+06
2	DALYs (Disability-Adjusted Life Years)	44639	Middle SDI	1	Male	14	45-49 years	1048	COVID-19	1	Number	2020	1.8094e+06	2.0121e+06	1.64057e+06
2	DALYs (Disability-Adjusted Life Years)	44639	Middle SDI	1	Male	15	50-54 years	1048	COVID-19	1	Number	2020	2.03849e+06	2.30006e+06	1.84682e+06
2	DALYs (Disability-Adjusted Life Years)	44639	Middle SDI	1	Male	16	55-59 years	1048	COVID-19	1	Number	2020	2.36546e+06	2.65531e+06	2.14365e+06
2	DALYs (Disability-Adjusted Life Years)	44639	Middle SDI	1	Male	17	60-64 years	1048	COVID-19	1	Number	2020	2.65176e+06	2.94244e+06	2.41747e+06
2	DALYs (Disability-Adjusted Life Years)	44639	Middle SDI	1	Male	18	65-69 years	1048	COVID-19	1	Number	2020	2.55155e+06	2.85256e+06	2.32507e+06
2	DALYs (Disability-Adjusted Life Years)	44639	Middle SDI	1	Male	19	70-74 years	1048	COVID-19	1	Number	2020	1.97613e+06	2.20779e+06	1.80432e+06
2	DALYs (Disability-Adjusted Life Years)	44639	Middle SDI	1	Male	20	75-79 years	1048	COVID-19	1	Number	2020	1.37511e+06	1.53511e+06	1.25343e+06
2	DALYs (Disability-Adjusted Life Years)	44639	Middle SDI	1	Male	30	80-84 years	1048	COVID-19	1	Number	2020	993458	1.10572e+06	909682
2	DALYs (Disability-Adjusted Life Years)	44639	Middle SDI	1	Male	31	85-89 years	1048	COVID-19	1	Number	2020	535060	593377	493276
2	DALYs (Disability-Adjusted Life Years)	44639	Middle SDI	1	Male	32	90-94 years	1048	COVID-19	1	Number	2020	255576	280029	234756
2	DALYs (Disability-Adjusted Life Years)	44639	Middle SDI	1	Male	235	95+ years	1048	COVID-19	1	Number	2020	101632	111046	92853.4
2	DALYs (Disability-Adjusted Life Years)	44639	Middle SDI	2	Female	1	<5 years	1048	COVID-19	1	Number	2020	108383	133267	93187.9
2	DALYs (Disability-Adjusted Life Years)	44639	Middle SDI	2	Female	6	5-9 years	1048	COVID-19	1	Number	2020	105640	157015	81779.3
2	DALYs (Disability-Adjusted Life Years)	44639	Middle SDI	2	Female	7	10-14 years	1048	COVID-19	1	Number	2020	111555	162062	86925.4
2	DALYs (Disability-Adjusted Life Years)	44639	Middle SDI	2	Female	8	15-19 years	1048	COVID-19	1	Number	2020	148367	202291	124036
2	DALYs (Disability-Adjusted Life Years)	44639	Middle SDI	2	Female	9	20-24 years	1048	COVID-19	1	Number	2020	246059	382175	174397
2	DALYs (Disability-Adjusted Life Years)	44639	Middle SDI	2	Female	10	25-29 years	1048	COVID-19	1	Number	2020	337254	469762	262194
2	DALYs (Disability-Adjusted Life Years)	44639	Middle SDI	2	Female	11	30-34 years	1048	COVID-19	1	Number	2020	433700	563068	358168
2	DALYs (Disability-Adjusted Life Years)	44639	Middle SDI	2	Female	12	35-39 years	1048	COVID-19	1	Number	2020	563881	685661	486908
2	DALYs (Disability-Adjusted Life Years)	44639	Middle SDI	2	Female	13	40-44 years	1048	COVID-19	1	Number	2020	747239	858864	662010
2	DALYs (Disability-Adjusted Life Years)	44639	Middle SDI	2	Female	14	45-49 years	1048	COVID-19	1	Number	2020	871774	991276	777585
2	DALYs (Disability-Adjusted Life Years)	44639	Middle SDI	2	Female	15	50-54 years	1048	COVID-19	1	Number	2020	976131	1.1103e+06	875530
2	DALYs (Disability-Adjusted Life Years)	44639	Middle SDI	2	Female	16	55-59 years	1048	COVID-19	1	Number	2020	1.17573e+06	1.3308e+06	1.06093e+06
2	DALYs (Disability-Adjusted Life Years)	44639	Middle SDI	2	Female	17	60-64 years	1048	COVID-19	1	Number	2020	1.37482e+06	1.53535e+06	1.25482e+06
2	DALYs (Disability-Adjusted Life Years)	44639	Middle SDI	2	Female	18	65-69 years	1048	COVID-19	1	Number	2020	1.34896e+06	1.50788e+06	1.23419e+06
2	DALYs (Disability-Adjusted Life Years)	44639	Middle SDI	2	Female	19	70-74 years	1048	COVID-19	1	Number	2020	1.15072e+06	1.28738e+06	1.05892e+06
2	DALYs (Disability-Adjusted Life Years)	44639	Middle SDI	2	Female	20	75-79 years	1048	COVID-19	1	Number	2020	816748	926104	745417
2	DALYs (Disability-Adjusted Life Years)	44639	Middle SDI	2	Female	30	80-84 years	1048	COVID-19	1	Number	2020	683005	775204	627329
2	DALYs (Disability-Adjusted Life Years)	44639	Middle SDI	2	Female	31	85-89 years	1048	COVID-19	1	Number	2020	461011	524483	419169
2	DALYs (Disability-Adjusted Life Years)	44639	Middle SDI	2	Female	32	90-94 years	1048	COVID-19	1	Number	2020	248434	279991	226138
2	DALYs (Disability-Adjusted Life Years)	44639	Middle SDI	2	Female	235	95+ years	1048	COVID-19	1	Number	2020	91264.9	101745	82943.6
2	DALYs (Disability-Adjusted Life Years)	44639	Middle SDI	3	Both	1	<5 years	1048	COVID-19	1	Number	2020	234506	288123	202117
2	DALYs (Disability-Adjusted Life Years)	44639	Middle SDI	3	Both	6	5-9 years	1048	COVID-19	1	Number	2020	235619	341890	186314
2	DALYs (Disability-Adjusted Life Years)	44639	Middle SDI	3	Both	7	10-14 years	1048	COVID-19	1	Number	2020	240276	344473	189811
2	DALYs (Disability-Adjusted Life Years)	44639	Middle SDI	3	Both	8	15-19 years	1048	COVID-19	1	Number	2020	309585	419084	254556
2	DALYs (Disability-Adjusted Life Years)	44639	Middle SDI	3	Both	9	20-24 years	1048	COVID-19	1	Number	2020	492476	700700	378275
2	DALYs (Disability-Adjusted Life Years)	44639	Middle SDI	3	Both	10	25-29 years	1048	COVID-19	1	Number	2020	832159	1.03474e+06	705836
2	DALYs (Disability-Adjusted Life Years)	44639	Middle SDI	3	Both	11	30-34 years	1048	COVID-19	1	Number	2020	1.27671e+06	1.49027e+06	1.13102e+06
2	DALYs (Disability-Adjusted Life Years)	44639	Middle SDI	3	Both	12	35-39 years	1048	COVID-19	1	Number	2020	1.64892e+06	1.86099e+06	1.4923e+06
2	DALYs (Disability-Adjusted Life Years)	44639	Middle SDI	3	Both	13	40-44 years	1048	COVID-19	1	Number	2020	2.25012e+06	2.50377e+06	2.0605e+06
2	DALYs (Disability-Adjusted Life Years)	44639	Middle SDI	3	Both	14	45-49 years	1048	COVID-19	1	Number	2020	2.68117e+06	2.97195e+06	2.45134e+06
2	DALYs (Disability-Adjusted Life Years)	44639	Middle SDI	3	Both	15	50-54 years	1048	COVID-19	1	Number	2020	3.01462e+06	3.33919e+06	2.75767e+06
2	DALYs (Disability-Adjusted Life Years)	44639	Middle SDI	3	Both	16	55-59 years	1048	COVID-19	1	Number	2020	3.54119e+06	3.91067e+06	3.24433e+06
2	DALYs (Disability-Adjusted Life Years)	44639	Middle SDI	3	Both	17	60-64 years	1048	COVID-19	1	Number	2020	4.02659e+06	4.4415e+06	3.70185e+06
2	DALYs (Disability-Adjusted Life Years)	44639	Middle SDI	3	Both	18	65-69 years	1048	COVID-19	1	Number	2020	3.90051e+06	4.30359e+06	3.5885e+06
2	DALYs (Disability-Adjusted Life Years)	44639	Middle SDI	3	Both	19	70-74 years	1048	COVID-19	1	Number	2020	3.12685e+06	3.43202e+06	2.88912e+06
2	DALYs (Disability-Adjusted Life Years)	44639	Middle SDI	3	Both	20	75-79 years	1048	COVID-19	1	Number	2020	2.19186e+06	2.41373e+06	2.02513e+06
2	DALYs (Disability-Adjusted Life Years)	44639	Middle SDI	3	Both	30	80-84 years	1048	COVID-19	1	Number	2020	1.67646e+06	1.84212e+06	1.54887e+06
2	DALYs (Disability-Adjusted Life Years)	44639	Middle SDI	3	Both	31	85-89 years	1048	COVID-19	1	Number	2020	996071	1.09971e+06	918700
2	DALYs (Disability-Adjusted Life Years)	44639	Middle SDI	3	Both	32	90-94 years	1048	COVID-19	1	Number	2020	504010	559103	464393
2	DALYs (Disability-Adjusted Life Years)	44639	Middle SDI	3	Both	235	95+ years	1048	COVID-19	1	Number	2020	192897	211749	177112
2	DALYs (Disability-Adjusted Life Years)	1	Global	1	Male	1	<5 years	1048	COVID-19	1	Number	2021	978986	1.31117e+06	829668
2	DALYs (Disability-Adjusted Life Years)	1	Global	1	Male	6	5-9 years	1048	COVID-19	1	Number	2021	914280	1.53239e+06	616054
2	DALYs (Disability-Adjusted Life Years)	1	Global	1	Male	7	10-14 years	1048	COVID-19	1	Number	2021	1.04179e+06	1.6733e+06	735843
2	DALYs (Disability-Adjusted Life Years)	1	Global	1	Male	8	15-19 years	1048	COVID-19	1	Number	2021	1.39646e+06	2.03425e+06	1.14412e+06
2	DALYs (Disability-Adjusted Life Years)	1	Global	1	Male	9	20-24 years	1048	COVID-19	1	Number	2021	2.15795e+06	3.05319e+06	1.75158e+06
2	DALYs (Disability-Adjusted Life Years)	1	Global	1	Male	10	25-29 years	1048	COVID-19	1	Number	2021	3.68269e+06	4.52715e+06	3.26479e+06
2	DALYs (Disability-Adjusted Life Years)	1	Global	1	Male	11	30-34 years	1048	COVID-19	1	Number	2021	6.02596e+06	6.84861e+06	5.56657e+06
2	DALYs (Disability-Adjusted Life Years)	1	Global	1	Male	12	35-39 years	1048	COVID-19	1	Number	2021	7.48519e+06	8.26852e+06	6.9918e+06
2	DALYs (Disability-Adjusted Life Years)	1	Global	1	Male	13	40-44 years	1048	COVID-19	1	Number	2021	9.78143e+06	1.05777e+07	9.21621e+06
2	DALYs (Disability-Adjusted Life Years)	1	Global	1	Male	14	45-49 years	1048	COVID-19	1	Number	2021	1.07671e+07	1.1672e+07	1.01359e+07
2	DALYs (Disability-Adjusted Life Years)	1	Global	1	Male	15	50-54 years	1048	COVID-19	1	Number	2021	1.14696e+07	1.24378e+07	1.07955e+07
2	DALYs (Disability-Adjusted Life Years)	1	Global	1	Male	16	55-59 years	1048	COVID-19	1	Number	2021	1.3054e+07	1.41022e+07	1.22932e+07
2	DALYs (Disability-Adjusted Life Years)	1	Global	1	Male	17	60-64 years	1048	COVID-19	1	Number	2021	1.49462e+07	1.60803e+07	1.40907e+07
2	DALYs (Disability-Adjusted Life Years)	1	Global	1	Male	18	65-69 years	1048	COVID-19	1	Number	2021	1.53074e+07	1.64712e+07	1.44627e+07
2	DALYs (Disability-Adjusted Life Years)	1	Global	1	Male	19	70-74 years	1048	COVID-19	1	Number	2021	1.25225e+07	1.3351e+07	1.1885e+07
2	DALYs (Disability-Adjusted Life Years)	1	Global	1	Male	20	75-79 years	1048	COVID-19	1	Number	2021	8.54103e+06	9.06462e+06	8.12915e+06
2	DALYs (Disability-Adjusted Life Years)	1	Global	1	Male	30	80-84 years	1048	COVID-19	1	Number	2021	6.16074e+06	6.50705e+06	5.87563e+06
2	DALYs (Disability-Adjusted Life Years)	1	Global	1	Male	31	85-89 years	1048	COVID-19	1	Number	2021	3.30812e+06	3.48866e+06	3.164e+06
2	DALYs (Disability-Adjusted Life Years)	1	Global	1	Male	32	90-94 years	1048	COVID-19	1	Number	2021	1.65397e+06	1.74179e+06	1.58519e+06
2	DALYs (Disability-Adjusted Life Years)	1	Global	1	Male	235	95+ years	1048	COVID-19	1	Number	2021	577589	610434	551601
2	DALYs (Disability-Adjusted Life Years)	1	Global	2	Female	1	<5 years	1048	COVID-19	1	Number	2021	853138	1.16452e+06	716999
2	DALYs (Disability-Adjusted Life Years)	1	Global	2	Female	6	5-9 years	1048	COVID-19	1	Number	2021	727664	1.33172e+06	454060
2	DALYs (Disability-Adjusted Life Years)	1	Global	2	Female	7	10-14 years	1048	COVID-19	1	Number	2021	785631	1.40472e+06	486441
2	DALYs (Disability-Adjusted Life Years)	1	Global	2	Female	8	15-19 years	1048	COVID-19	1	Number	2021	1.2593e+06	1.86826e+06	1.02316e+06
2	DALYs (Disability-Adjusted Life Years)	1	Global	2	Female	9	20-24 years	1048	COVID-19	1	Number	2021	2.2044e+06	3.78618e+06	1.46437e+06
2	DALYs (Disability-Adjusted Life Years)	1	Global	2	Female	10	25-29 years	1048	COVID-19	1	Number	2021	2.7539e+06	4.21315e+06	2.06916e+06
2	DALYs (Disability-Adjusted Life Years)	1	Global	2	Female	11	30-34 years	1048	COVID-19	1	Number	2021	3.36541e+06	4.68107e+06	2.72171e+06
2	DALYs (Disability-Adjusted Life Years)	1	Global	2	Female	12	35-39 years	1048	COVID-19	1	Number	2021	4.13035e+06	5.2681e+06	3.53435e+06
2	DALYs (Disability-Adjusted Life Years)	1	Global	2	Female	13	40-44 years	1048	COVID-19	1	Number	2021	5.10255e+06	6.05464e+06	4.54984e+06
2	DALYs (Disability-Adjusted Life Years)	1	Global	2	Female	14	45-49 years	1048	COVID-19	1	Number	2021	5.5174e+06	6.38055e+06	4.99449e+06
2	DALYs (Disability-Adjusted Life Years)	1	Global	2	Female	15	50-54 years	1048	COVID-19	1	Number	2021	5.71852e+06	6.50816e+06	5.22648e+06
2	DALYs (Disability-Adjusted Life Years)	1	Global	2	Female	16	55-59 years	1048	COVID-19	1	Number	2021	6.65764e+06	7.43785e+06	6.14181e+06
2	DALYs (Disability-Adjusted Life Years)	1	Global	2	Female	17	60-64 years	1048	COVID-19	1	Number	2021	8.13244e+06	8.84937e+06	7.61639e+06
2	DALYs (Disability-Adjusted Life Years)	1	Global	2	Female	18	65-69 years	1048	COVID-19	1	Number	2021	8.52803e+06	9.1389e+06	8.01785e+06
2	DALYs (Disability-Adjusted Life Years)	1	Global	2	Female	19	70-74 years	1048	COVID-19	1	Number	2021	7.68353e+06	8.18756e+06	7.24522e+06
2	DALYs (Disability-Adjusted Life Years)	1	Global	2	Female	20	75-79 years	1048	COVID-19	1	Number	2021	5.485e+06	5.84299e+06	5.19847e+06
2	DALYs (Disability-Adjusted Life Years)	1	Global	2	Female	30	80-84 years	1048	COVID-19	1	Number	2021	5.11859e+06	5.42019e+06	4.85691e+06
2	DALYs (Disability-Adjusted Life Years)	1	Global	2	Female	31	85-89 years	1048	COVID-19	1	Number	2021	3.31215e+06	3.49823e+06	3.14259e+06
2	DALYs (Disability-Adjusted Life Years)	1	Global	2	Female	32	90-94 years	1048	COVID-19	1	Number	2021	2.05184e+06	2.15861e+06	1.95791e+06
2	DALYs (Disability-Adjusted Life Years)	1	Global	2	Female	235	95+ years	1048	COVID-19	1	Number	2021	849128	895546	811291
2	DALYs (Disability-Adjusted Life Years)	1	Global	3	Both	1	<5 years	1048	COVID-19	1	Number	2021	1.83212e+06	2.47567e+06	1.54961e+06
2	DALYs (Disability-Adjusted Life Years)	1	Global	3	Both	6	5-9 years	1048	COVID-19	1	Number	2021	1.64194e+06	2.864e+06	1.08687e+06
2	DALYs (Disability-Adjusted Life Years)	1	Global	3	Both	7	10-14 years	1048	COVID-19	1	Number	2021	1.82742e+06	3.071e+06	1.22569e+06
2	DALYs (Disability-Adjusted Life Years)	1	Global	3	Both	8	15-19 years	1048	COVID-19	1	Number	2021	2.65577e+06	3.90116e+06	2.17345e+06
2	DALYs (Disability-Adjusted Life Years)	1	Global	3	Both	9	20-24 years	1048	COVID-19	1	Number	2021	4.36236e+06	6.83445e+06	3.22799e+06
2	DALYs (Disability-Adjusted Life Years)	1	Global	3	Both	10	25-29 years	1048	COVID-19	1	Number	2021	6.43659e+06	8.70688e+06	5.33677e+06
2	DALYs (Disability-Adjusted Life Years)	1	Global	3	Both	11	30-34 years	1048	COVID-19	1	Number	2021	9.39136e+06	1.15056e+07	8.31411e+06
2	DALYs (Disability-Adjusted Life Years)	1	Global	3	Both	12	35-39 years	1048	COVID-19	1	Number	2021	1.16155e+07	1.35165e+07	1.05612e+07
2	DALYs (Disability-Adjusted Life Years)	1	Global	3	Both	13	40-44 years	1048	COVID-19	1	Number	2021	1.4884e+07	1.65713e+07	1.38359e+07
2	DALYs (Disability-Adjusted Life Years)	1	Global	3	Both	14	45-49 years	1048	COVID-19	1	Number	2021	1.62845e+07	1.79567e+07	1.52398e+07
2	DALYs (Disability-Adjusted Life Years)	1	Global	3	Both	15	50-54 years	1048	COVID-19	1	Number	2021	1.71881e+07	1.87543e+07	1.61342e+07
2	DALYs (Disability-Adjusted Life Years)	1	Global	3	Both	16	55-59 years	1048	COVID-19	1	Number	2021	1.97116e+07	2.14253e+07	1.85867e+07
2	DALYs (Disability-Adjusted Life Years)	1	Global	3	Both	17	60-64 years	1048	COVID-19	1	Number	2021	2.30787e+07	2.4907e+07	2.18583e+07
2	DALYs (Disability-Adjusted Life Years)	1	Global	3	Both	18	65-69 years	1048	COVID-19	1	Number	2021	2.38354e+07	2.55272e+07	2.26268e+07
2	DALYs (Disability-Adjusted Life Years)	1	Global	3	Both	19	70-74 years	1048	COVID-19	1	Number	2021	2.0206e+07	2.1495e+07	1.92722e+07
2	DALYs (Disability-Adjusted Life Years)	1	Global	3	Both	20	75-79 years	1048	COVID-19	1	Number	2021	1.4026e+07	1.48965e+07	1.33741e+07
2	DALYs (Disability-Adjusted Life Years)	1	Global	3	Both	30	80-84 years	1048	COVID-19	1	Number	2021	1.12793e+07	1.19264e+07	1.07702e+07
2	DALYs (Disability-Adjusted Life Years)	1	Global	3	Both	31	85-89 years	1048	COVID-19	1	Number	2021	6.62026e+06	6.98287e+06	6.32878e+06
2	DALYs (Disability-Adjusted Life Years)	1	Global	3	Both	32	90-94 years	1048	COVID-19	1	Number	2021	3.7058e+06	3.89647e+06	3.55183e+06
2	DALYs (Disability-Adjusted Life Years)	1	Global	3	Both	235	95+ years	1048	COVID-19	1	Number	2021	1.42672e+06	1.50298e+06	1.36272e+06
2	DALYs (Disability-Adjusted Life Years)	44634	High-middle SDI	1	Male	1	<5 years	1048	COVID-19	1	Number	2021	53333.6	76168.1	43037.4
2	DALYs (Disability-Adjusted Life Years)	44634	High-middle SDI	1	Male	6	5-9 years	1048	COVID-19	1	Number	2021	55883	102019	36476.6
2	DALYs (Disability-Adjusted Life Years)	44634	High-middle SDI	1	Male	7	10-14 years	1048	COVID-19	1	Number	2021	62715.1	110279	42843.7
2	DALYs (Disability-Adjusted Life Years)	44634	High-middle SDI	1	Male	8	15-19 years	1048	COVID-19	1	Number	2021	80726.1	127731	59357.6
2	DALYs (Disability-Adjusted Life Years)	44634	High-middle SDI	1	Male	9	20-24 years	1048	COVID-19	1	Number	2021	127582	198234	94653.7
2	DALYs (Disability-Adjusted Life Years)	44634	High-middle SDI	1	Male	10	25-29 years	1048	COVID-19	1	Number	2021	247074	323013	205846
2	DALYs (Disability-Adjusted Life Years)	44634	High-middle SDI	1	Male	11	30-34 years	1048	COVID-19	1	Number	2021	522705	609820	454840
2	DALYs (Disability-Adjusted Life Years)	44634	High-middle SDI	1	Male	12	35-39 years	1048	COVID-19	1	Number	2021	730779	839300	632941
2	DALYs (Disability-Adjusted Life Years)	44634	High-middle SDI	1	Male	13	40-44 years	1048	COVID-19	1	Number	2021	1.08398e+06	1.23249e+06	948845
2	DALYs (Disability-Adjusted Life Years)	44634	High-middle SDI	1	Male	14	45-49 years	1048	COVID-19	1	Number	2021	1.26393e+06	1.45189e+06	1.10289e+06
2	DALYs (Disability-Adjusted Life Years)	44634	High-middle SDI	1	Male	15	50-54 years	1048	COVID-19	1	Number	2021	1.38387e+06	1.58163e+06	1.21398e+06
2	DALYs (Disability-Adjusted Life Years)	44634	High-middle SDI	1	Male	16	55-59 years	1048	COVID-19	1	Number	2021	1.83809e+06	2.10176e+06	1.60696e+06
2	DALYs (Disability-Adjusted Life Years)	44634	High-middle SDI	1	Male	17	60-64 years	1048	COVID-19	1	Number	2021	2.36029e+06	2.68072e+06	2.07685e+06
2	DALYs (Disability-Adjusted Life Years)	44634	High-middle SDI	1	Male	18	65-69 years	1048	COVID-19	1	Number	2021	2.57699e+06	2.87269e+06	2.30091e+06
2	DALYs (Disability-Adjusted Life Years)	44634	High-middle SDI	1	Male	19	70-74 years	1048	COVID-19	1	Number	2021	2.16263e+06	2.38554e+06	1.93911e+06
2	DALYs (Disability-Adjusted Life Years)	44634	High-middle SDI	1	Male	20	75-79 years	1048	COVID-19	1	Number	2021	1.22687e+06	1.32668e+06	1.12869e+06
2	DALYs (Disability-Adjusted Life Years)	44634	High-middle SDI	1	Male	30	80-84 years	1048	COVID-19	1	Number	2021	1.21129e+06	1.30186e+06	1.11745e+06
2	DALYs (Disability-Adjusted Life Years)	44634	High-middle SDI	1	Male	31	85-89 years	1048	COVID-19	1	Number	2021	630983	669931	588918
2	DALYs (Disability-Adjusted Life Years)	44634	High-middle SDI	1	Male	32	90-94 years	1048	COVID-19	1	Number	2021	279219	296920	259906
2	DALYs (Disability-Adjusted Life Years)	44634	High-middle SDI	1	Male	235	95+ years	1048	COVID-19	1	Number	2021	82898	89009.4	75887.1
2	DALYs (Disability-Adjusted Life Years)	44634	High-middle SDI	2	Female	1	<5 years	1048	COVID-19	1	Number	2021	46426.6	68493.6	37319.7
2	DALYs (Disability-Adjusted Life Years)	44634	High-middle SDI	2	Female	6	5-9 years	1048	COVID-19	1	Number	2021	48936.2	93270.3	31512.1
2	DALYs (Disability-Adjusted Life Years)	44634	High-middle SDI	2	Female	7	10-14 years	1048	COVID-19	1	Number	2021	57018.8	102853	38968.9
2	DALYs (Disability-Adjusted Life Years)	44634	High-middle SDI	2	Female	8	15-19 years	1048	COVID-19	1	Number	2021	74981.6	121340	57287.4
2	DALYs (Disability-Adjusted Life Years)	44634	High-middle SDI	2	Female	9	20-24 years	1048	COVID-19	1	Number	2021	143863	255294	89120.9
2	DALYs (Disability-Adjusted Life Years)	44634	High-middle SDI	2	Female	10	25-29 years	1048	COVID-19	1	Number	2021	196422	315031	136115
2	DALYs (Disability-Adjusted Life Years)	44634	High-middle SDI	2	Female	11	30-34 years	1048	COVID-19	1	Number	2021	312058	445414	238843
2	DALYs (Disability-Adjusted Life Years)	44634	High-middle SDI	2	Female	12	35-39 years	1048	COVID-19	1	Number	2021	412998	540972	332169
2	DALYs (Disability-Adjusted Life Years)	44634	High-middle SDI	2	Female	13	40-44 years	1048	COVID-19	1	Number	2021	566999	688816	479786
2	DALYs (Disability-Adjusted Life Years)	44634	High-middle SDI	2	Female	14	45-49 years	1048	COVID-19	1	Number	2021	672674	791638	579030
2	DALYs (Disability-Adjusted Life Years)	44634	High-middle SDI	2	Female	15	50-54 years	1048	COVID-19	1	Number	2021	755444	875007	656410
2	DALYs (Disability-Adjusted Life Years)	44634	High-middle SDI	2	Female	16	55-59 years	1048	COVID-19	1	Number	2021	1.0549e+06	1.20432e+06	926762
2	DALYs (Disability-Adjusted Life Years)	44634	High-middle SDI	2	Female	17	60-64 years	1048	COVID-19	1	Number	2021	1.55201e+06	1.73481e+06	1.38072e+06
2	DALYs (Disability-Adjusted Life Years)	44634	High-middle SDI	2	Female	18	65-69 years	1048	COVID-19	1	Number	2021	1.79645e+06	1.97769e+06	1.62162e+06
2	DALYs (Disability-Adjusted Life Years)	44634	High-middle SDI	2	Female	19	70-74 years	1048	COVID-19	1	Number	2021	1.75735e+06	1.9349e+06	1.59484e+06
2	DALYs (Disability-Adjusted Life Years)	44634	High-middle SDI	2	Female	20	75-79 years	1048	COVID-19	1	Number	2021	1.08023e+06	1.17308e+06	987843
2	DALYs (Disability-Adjusted Life Years)	44634	High-middle SDI	2	Female	30	80-84 years	1048	COVID-19	1	Number	2021	1.50131e+06	1.65046e+06	1.37515e+06
2	DALYs (Disability-Adjusted Life Years)	44634	High-middle SDI	2	Female	31	85-89 years	1048	COVID-19	1	Number	2021	883870	970400	807168
2	DALYs (Disability-Adjusted Life Years)	44634	High-middle SDI	2	Female	32	90-94 years	1048	COVID-19	1	Number	2021	535868	576990	495165
2	DALYs (Disability-Adjusted Life Years)	44634	High-middle SDI	2	Female	235	95+ years	1048	COVID-19	1	Number	2021	190298	205496	174246
2	DALYs (Disability-Adjusted Life Years)	44634	High-middle SDI	3	Both	1	<5 years	1048	COVID-19	1	Number	2021	99760.2	144898	80795.1
2	DALYs (Disability-Adjusted Life Years)	44634	High-middle SDI	3	Both	6	5-9 years	1048	COVID-19	1	Number	2021	104819	195193	67967.5
2	DALYs (Disability-Adjusted Life Years)	44634	High-middle SDI	3	Both	7	10-14 years	1048	COVID-19	1	Number	2021	119734	213106	81588.8
2	DALYs (Disability-Adjusted Life Years)	44634	High-middle SDI	3	Both	8	15-19 years	1048	COVID-19	1	Number	2021	155708	248364	117578
2	DALYs (Disability-Adjusted Life Years)	44634	High-middle SDI	3	Both	9	20-24 years	1048	COVID-19	1	Number	2021	271445	453924	185023
2	DALYs (Disability-Adjusted Life Years)	44634	High-middle SDI	3	Both	10	25-29 years	1048	COVID-19	1	Number	2021	443496	635693	343881
2	DALYs (Disability-Adjusted Life Years)	44634	High-middle SDI	3	Both	11	30-34 years	1048	COVID-19	1	Number	2021	834763	1.05737e+06	700467
2	DALYs (Disability-Adjusted Life Years)	44634	High-middle SDI	3	Both	12	35-39 years	1048	COVID-19	1	Number	2021	1.14378e+06	1.36792e+06	978884
2	DALYs (Disability-Adjusted Life Years)	44634	High-middle SDI	3	Both	13	40-44 years	1048	COVID-19	1	Number	2021	1.65098e+06	1.8755e+06	1.45614e+06
2	DALYs (Disability-Adjusted Life Years)	44634	High-middle SDI	3	Both	14	45-49 years	1048	COVID-19	1	Number	2021	1.93661e+06	2.17915e+06	1.71968e+06
2	DALYs (Disability-Adjusted Life Years)	44634	High-middle SDI	3	Both	15	50-54 years	1048	COVID-19	1	Number	2021	2.13931e+06	2.38612e+06	1.90774e+06
2	DALYs (Disability-Adjusted Life Years)	44634	High-middle SDI	3	Both	16	55-59 years	1048	COVID-19	1	Number	2021	2.89299e+06	3.19812e+06	2.59957e+06
2	DALYs (Disability-Adjusted Life Years)	44634	High-middle SDI	3	Both	17	60-64 years	1048	COVID-19	1	Number	2021	3.9123e+06	4.2724e+06	3.54424e+06
2	DALYs (Disability-Adjusted Life Years)	44634	High-middle SDI	3	Both	18	65-69 years	1048	COVID-19	1	Number	2021	4.37344e+06	4.71431e+06	3.98993e+06
2	DALYs (Disability-Adjusted Life Years)	44634	High-middle SDI	3	Both	19	70-74 years	1048	COVID-19	1	Number	2021	3.91998e+06	4.20933e+06	3.59372e+06
2	DALYs (Disability-Adjusted Life Years)	44634	High-middle SDI	3	Both	20	75-79 years	1048	COVID-19	1	Number	2021	2.30709e+06	2.46992e+06	2.12998e+06
2	DALYs (Disability-Adjusted Life Years)	44634	High-middle SDI	3	Both	30	80-84 years	1048	COVID-19	1	Number	2021	2.7126e+06	2.89269e+06	2.52782e+06
2	DALYs (Disability-Adjusted Life Years)	44634	High-middle SDI	3	Both	31	85-89 years	1048	COVID-19	1	Number	2021	1.51485e+06	1.61418e+06	1.40457e+06
2	DALYs (Disability-Adjusted Life Years)	44634	High-middle SDI	3	Both	32	90-94 years	1048	COVID-19	1	Number	2021	815087	864904	759812
2	DALYs (Disability-Adjusted Life Years)	44634	High-middle SDI	3	Both	235	95+ years	1048	COVID-19	1	Number	2021	273196	293316	250381
2	DALYs (Disability-Adjusted Life Years)	44635	High SDI	1	Male	1	<5 years	1048	COVID-19	1	Number	2021	17113.7	30723	11848.4
2	DALYs (Disability-Adjusted Life Years)	44635	High SDI	1	Male	6	5-9 years	1048	COVID-19	1	Number	2021	17727.6	40790.8	8609.89
2	DALYs (Disability-Adjusted Life Years)	44635	High SDI	1	Male	7	10-14 years	1048	COVID-19	1	Number	2021	25639.6	55306.9	14626.9
2	DALYs (Disability-Adjusted Life Years)	44635	High SDI	1	Male	8	15-19 years	1048	COVID-19	1	Number	2021	153457	186346	141033
2	DALYs (Disability-Adjusted Life Years)	44635	High SDI	1	Male	9	20-24 years	1048	COVID-19	1	Number	2021	266410	312549	245530
2	DALYs (Disability-Adjusted Life Years)	44635	High SDI	1	Male	10	25-29 years	1048	COVID-19	1	Number	2021	358103	403579	335803
2	DALYs (Disability-Adjusted Life Years)	44635	High SDI	1	Male	11	30-34 years	1048	COVID-19	1	Number	2021	514573	563290	488091
2	DALYs (Disability-Adjusted Life Years)	44635	High SDI	1	Male	12	35-39 years	1048	COVID-19	1	Number	2021	593303	643333	560381
2	DALYs (Disability-Adjusted Life Years)	44635	High SDI	1	Male	13	40-44 years	1048	COVID-19	1	Number	2021	675147	724771	638165
2	DALYs (Disability-Adjusted Life Years)	44635	High SDI	1	Male	14	45-49 years	1048	COVID-19	1	Number	2021	750546	802543	709894
2	DALYs (Disability-Adjusted Life Years)	44635	High SDI	1	Male	15	50-54 years	1048	COVID-19	1	Number	2021	883455	936633	842803
2	DALYs (Disability-Adjusted Life Years)	44635	High SDI	1	Male	16	55-59 years	1048	COVID-19	1	Number	2021	1.09324e+06	1.15273e+06	1.04334e+06
2	DALYs (Disability-Adjusted Life Years)	44635	High SDI	1	Male	17	60-64 years	1048	COVID-19	1	Number	2021	1.3829e+06	1.45759e+06	1.31651e+06
2	DALYs (Disability-Adjusted Life Years)	44635	High SDI	1	Male	18	65-69 years	1048	COVID-19	1	Number	2021	1.50281e+06	1.58468e+06	1.4263e+06
2	DALYs (Disability-Adjusted Life Years)	44635	High SDI	1	Male	19	70-74 years	1048	COVID-19	1	Number	2021	1.43362e+06	1.50577e+06	1.36942e+06
2	DALYs (Disability-Adjusted Life Years)	44635	High SDI	1	Male	20	75-79 years	1048	COVID-19	1	Number	2021	1.1638e+06	1.21211e+06	1.1226e+06
2	DALYs (Disability-Adjusted Life Years)	44635	High SDI	1	Male	30	80-84 years	1048	COVID-19	1	Number	2021	898723	933431	867828
2	DALYs (Disability-Adjusted Life Years)	44635	High SDI	1	Male	31	85-89 years	1048	COVID-19	1	Number	2021	603049	624190	584018
2	DALYs (Disability-Adjusted Life Years)	44635	High SDI	1	Male	32	90-94 years	1048	COVID-19	1	Number	2021	356755	368173	346941
2	DALYs (Disability-Adjusted Life Years)	44635	High SDI	1	Male	235	95+ years	1048	COVID-19	1	Number	2021	133097	137497	128878
2	DALYs (Disability-Adjusted Life Years)	44635	High SDI	2	Female	1	<5 years	1048	COVID-19	1	Number	2021	15373	28750.3	10323
2	DALYs (Disability-Adjusted Life Years)	44635	High SDI	2	Female	6	5-9 years	1048	COVID-19	1	Number	2021	16557.2	38881.9	7724.52
2	DALYs (Disability-Adjusted Life Years)	44635	High SDI	2	Female	7	10-14 years	1048	COVID-19	1	Number	2021	24352.7	51930.7	14108.8
2	DALYs (Disability-Adjusted Life Years)	44635	High SDI	2	Female	8	15-19 years	1048	COVID-19	1	Number	2021	61771.5	91680.6	50639.6
2	DALYs (Disability-Adjusted Life Years)	44635	High SDI	2	Female	9	20-24 years	1048	COVID-19	1	Number	2021	130712	204113	94356.9
2	DALYs (Disability-Adjusted Life Years)	44635	High SDI	2	Female	10	25-29 years	1048	COVID-19	1	Number	2021	188914	263047	152603
2	DALYs (Disability-Adjusted Life Years)	44635	High SDI	2	Female	11	30-34 years	1048	COVID-19	1	Number	2021	230546	301184	194601
2	DALYs (Disability-Adjusted Life Years)	44635	High SDI	2	Female	12	35-39 years	1048	COVID-19	1	Number	2021	269678	339378	232770
2	DALYs (Disability-Adjusted Life Years)	44635	High SDI	2	Female	13	40-44 years	1048	COVID-19	1	Number	2021	327718	392484	291090
2	DALYs (Disability-Adjusted Life Years)	44635	High SDI	2	Female	14	45-49 years	1048	COVID-19	1	Number	2021	361190	426531	324556
2	DALYs (Disability-Adjusted Life Years)	44635	High SDI	2	Female	15	50-54 years	1048	COVID-19	1	Number	2021	430776	494015	393994
2	DALYs (Disability-Adjusted Life Years)	44635	High SDI	2	Female	16	55-59 years	1048	COVID-19	1	Number	2021	542759	609243	503086
2	DALYs (Disability-Adjusted Life Years)	44635	High SDI	2	Female	17	60-64 years	1048	COVID-19	1	Number	2021	738047	800306	694322
2	DALYs (Disability-Adjusted Life Years)	44635	High SDI	2	Female	18	65-69 years	1048	COVID-19	1	Number	2021	860921	918635	814466
2	DALYs (Disability-Adjusted Life Years)	44635	High SDI	2	Female	19	70-74 years	1048	COVID-19	1	Number	2021	874739	927711	831989
2	DALYs (Disability-Adjusted Life Years)	44635	High SDI	2	Female	20	75-79 years	1048	COVID-19	1	Number	2021	800065	836421	769586
2	DALYs (Disability-Adjusted Life Years)	44635	High SDI	2	Female	30	80-84 years	1048	COVID-19	1	Number	2021	742941	776533	713797
2	DALYs (Disability-Adjusted Life Years)	44635	High SDI	2	Female	31	85-89 years	1048	COVID-19	1	Number	2021	678537	710288	653072
2	DALYs (Disability-Adjusted Life Years)	44635	High SDI	2	Female	32	90-94 years	1048	COVID-19	1	Number	2021	555283	573058	539404
2	DALYs (Disability-Adjusted Life Years)	44635	High SDI	2	Female	235	95+ years	1048	COVID-19	1	Number	2021	298363	309220	288832
2	DALYs (Disability-Adjusted Life Years)	44635	High SDI	3	Both	1	<5 years	1048	COVID-19	1	Number	2021	32486.6	59463.9	22132.1
2	DALYs (Disability-Adjusted Life Years)	44635	High SDI	3	Both	6	5-9 years	1048	COVID-19	1	Number	2021	34284.8	79912.7	16332.5
2	DALYs (Disability-Adjusted Life Years)	44635	High SDI	3	Both	7	10-14 years	1048	COVID-19	1	Number	2021	49992.3	107353	28893.3
2	DALYs (Disability-Adjusted Life Years)	44635	High SDI	3	Both	8	15-19 years	1048	COVID-19	1	Number	2021	215229	278155	191771
2	DALYs (Disability-Adjusted Life Years)	44635	High SDI	3	Both	9	20-24 years	1048	COVID-19	1	Number	2021	397122	516662	340765
2	DALYs (Disability-Adjusted Life Years)	44635	High SDI	3	Both	10	25-29 years	1048	COVID-19	1	Number	2021	547018	664255	489663
2	DALYs (Disability-Adjusted Life Years)	44635	High SDI	3	Both	11	30-34 years	1048	COVID-19	1	Number	2021	745119	857866	684714
2	DALYs (Disability-Adjusted Life Years)	44635	High SDI	3	Both	12	35-39 years	1048	COVID-19	1	Number	2021	862981	976010	796248
2	DALYs (Disability-Adjusted Life Years)	44635	High SDI	3	Both	13	40-44 years	1048	COVID-19	1	Number	2021	1.00287e+06	1.11328e+06	932441
2	DALYs (Disability-Adjusted Life Years)	44635	High SDI	3	Both	14	45-49 years	1048	COVID-19	1	Number	2021	1.11174e+06	1.22193e+06	1.03932e+06
2	DALYs (Disability-Adjusted Life Years)	44635	High SDI	3	Both	15	50-54 years	1048	COVID-19	1	Number	2021	1.31423e+06	1.42638e+06	1.23877e+06
2	DALYs (Disability-Adjusted Life Years)	44635	High SDI	3	Both	16	55-59 years	1048	COVID-19	1	Number	2021	1.636e+06	1.75333e+06	1.55519e+06
2	DALYs (Disability-Adjusted Life Years)	44635	High SDI	3	Both	17	60-64 years	1048	COVID-19	1	Number	2021	2.12094e+06	2.24269e+06	2.02797e+06
2	DALYs (Disability-Adjusted Life Years)	44635	High SDI	3	Both	18	65-69 years	1048	COVID-19	1	Number	2021	2.36373e+06	2.48969e+06	2.25897e+06
2	DALYs (Disability-Adjusted Life Years)	44635	High SDI	3	Both	19	70-74 years	1048	COVID-19	1	Number	2021	2.30836e+06	2.41846e+06	2.21194e+06
2	DALYs (Disability-Adjusted Life Years)	44635	High SDI	3	Both	20	75-79 years	1048	COVID-19	1	Number	2021	1.96386e+06	2.0367e+06	1.89749e+06
2	DALYs (Disability-Adjusted Life Years)	44635	High SDI	3	Both	30	80-84 years	1048	COVID-19	1	Number	2021	1.64166e+06	1.70446e+06	1.58775e+06
2	DALYs (Disability-Adjusted Life Years)	44635	High SDI	3	Both	31	85-89 years	1048	COVID-19	1	Number	2021	1.28159e+06	1.3276e+06	1.24182e+06
2	DALYs (Disability-Adjusted Life Years)	44635	High SDI	3	Both	32	90-94 years	1048	COVID-19	1	Number	2021	912037	938186	887996
2	DALYs (Disability-Adjusted Life Years)	44635	High SDI	3	Both	235	95+ years	1048	COVID-19	1	Number	2021	431460	444748	418341
2	DALYs (Disability-Adjusted Life Years)	44636	Low-middle SDI	1	Male	1	<5 years	1048	COVID-19	1	Number	2021	352387	472117	296588
2	DALYs (Disability-Adjusted Life Years)	44636	Low-middle SDI	1	Male	6	5-9 years	1048	COVID-19	1	Number	2021	339479	566396	220478
2	DALYs (Disability-Adjusted Life Years)	44636	Low-middle SDI	1	Male	7	10-14 years	1048	COVID-19	1	Number	2021	396067	634091	270649
2	DALYs (Disability-Adjusted Life Years)	44636	Low-middle SDI	1	Male	8	15-19 years	1048	COVID-19	1	Number	2021	483768	722507	387548
2	DALYs (Disability-Adjusted Life Years)	44636	Low-middle SDI	1	Male	9	20-24 years	1048	COVID-19	1	Number	2021	751575	1.09031e+06	604566
2	DALYs (Disability-Adjusted Life Years)	44636	Low-middle SDI	1	Male	10	25-29 years	1048	COVID-19	1	Number	2021	1.27245e+06	1.57589e+06	1.11968e+06
2	DALYs (Disability-Adjusted Life Years)	44636	Low-middle SDI	1	Male	11	30-34 years	1048	COVID-19	1	Number	2021	2.00767e+06	2.298e+06	1.82681e+06
2	DALYs (Disability-Adjusted Life Years)	44636	Low-middle SDI	1	Male	12	35-39 years	1048	COVID-19	1	Number	2021	2.43238e+06	2.70394e+06	2.24298e+06
2	DALYs (Disability-Adjusted Life Years)	44636	Low-middle SDI	1	Male	13	40-44 years	1048	COVID-19	1	Number	2021	3.16442e+06	3.45118e+06	2.94806e+06
2	DALYs (Disability-Adjusted Life Years)	44636	Low-middle SDI	1	Male	14	45-49 years	1048	COVID-19	1	Number	2021	3.38625e+06	3.6921e+06	3.15687e+06
2	DALYs (Disability-Adjusted Life Years)	44636	Low-middle SDI	1	Male	15	50-54 years	1048	COVID-19	1	Number	2021	3.55237e+06	3.86922e+06	3.30757e+06
2	DALYs (Disability-Adjusted Life Years)	44636	Low-middle SDI	1	Male	16	55-59 years	1048	COVID-19	1	Number	2021	3.90341e+06	4.25458e+06	3.63601e+06
2	DALYs (Disability-Adjusted Life Years)	44636	Low-middle SDI	1	Male	17	60-64 years	1048	COVID-19	1	Number	2021	4.43301e+06	4.83364e+06	4.13487e+06
2	DALYs (Disability-Adjusted Life Years)	44636	Low-middle SDI	1	Male	18	65-69 years	1048	COVID-19	1	Number	2021	4.58478e+06	4.97146e+06	4.29436e+06
2	DALYs (Disability-Adjusted Life Years)	44636	Low-middle SDI	1	Male	19	70-74 years	1048	COVID-19	1	Number	2021	3.80051e+06	4.07585e+06	3.58254e+06
2	DALYs (Disability-Adjusted Life Years)	44636	Low-middle SDI	1	Male	20	75-79 years	1048	COVID-19	1	Number	2021	2.61558e+06	2.79733e+06	2.47182e+06
2	DALYs (Disability-Adjusted Life Years)	44636	Low-middle SDI	1	Male	30	80-84 years	1048	COVID-19	1	Number	2021	1.68853e+06	1.80437e+06	1.59667e+06
2	DALYs (Disability-Adjusted Life Years)	44636	Low-middle SDI	1	Male	31	85-89 years	1048	COVID-19	1	Number	2021	802439	858077	755276
2	DALYs (Disability-Adjusted Life Years)	44636	Low-middle SDI	1	Male	32	90-94 years	1048	COVID-19	1	Number	2021	391410	417769	368877
2	DALYs (Disability-Adjusted Life Years)	44636	Low-middle SDI	1	Male	235	95+ years	1048	COVID-19	1	Number	2021	120600	129990	112811
2	DALYs (Disability-Adjusted Life Years)	44636	Low-middle SDI	2	Female	1	<5 years	1048	COVID-19	1	Number	2021	305818	419609	254399
2	DALYs (Disability-Adjusted Life Years)	44636	Low-middle SDI	2	Female	6	5-9 years	1048	COVID-19	1	Number	2021	259561	475382	151554
2	DALYs (Disability-Adjusted Life Years)	44636	Low-middle SDI	2	Female	7	10-14 years	1048	COVID-19	1	Number	2021	279927	515631	165634
2	DALYs (Disability-Adjusted Life Years)	44636	Low-middle SDI	2	Female	8	15-19 years	1048	COVID-19	1	Number	2021	458710	685513	368237
2	DALYs (Disability-Adjusted Life Years)	44636	Low-middle SDI	2	Female	9	20-24 years	1048	COVID-19	1	Number	2021	800226	1.38713e+06	510360
2	DALYs (Disability-Adjusted Life Years)	44636	Low-middle SDI	2	Female	10	25-29 years	1048	COVID-19	1	Number	2021	952788	1.4869e+06	696637
2	DALYs (Disability-Adjusted Life Years)	44636	Low-middle SDI	2	Female	11	30-34 years	1048	COVID-19	1	Number	2021	1.11921e+06	1.59091e+06	887142
2	DALYs (Disability-Adjusted Life Years)	44636	Low-middle SDI	2	Female	12	35-39 years	1048	COVID-19	1	Number	2021	1.34149e+06	1.74694e+06	1.13042e+06
2	DALYs (Disability-Adjusted Life Years)	44636	Low-middle SDI	2	Female	13	40-44 years	1048	COVID-19	1	Number	2021	1.6448e+06	2.0003e+06	1.44785e+06
2	DALYs (Disability-Adjusted Life Years)	44636	Low-middle SDI	2	Female	14	45-49 years	1048	COVID-19	1	Number	2021	1.72968e+06	2.0324e+06	1.54652e+06
2	DALYs (Disability-Adjusted Life Years)	44636	Low-middle SDI	2	Female	15	50-54 years	1048	COVID-19	1	Number	2021	1.71448e+06	1.96721e+06	1.54646e+06
2	DALYs (Disability-Adjusted Life Years)	44636	Low-middle SDI	2	Female	16	55-59 years	1048	COVID-19	1	Number	2021	1.89127e+06	2.12228e+06	1.7243e+06
2	DALYs (Disability-Adjusted Life Years)	44636	Low-middle SDI	2	Female	17	60-64 years	1048	COVID-19	1	Number	2021	2.24934e+06	2.48266e+06	2.07878e+06
2	DALYs (Disability-Adjusted Life Years)	44636	Low-middle SDI	2	Female	18	65-69 years	1048	COVID-19	1	Number	2021	2.33618e+06	2.54667e+06	2.1846e+06
2	DALYs (Disability-Adjusted Life Years)	44636	Low-middle SDI	2	Female	19	70-74 years	1048	COVID-19	1	Number	2021	2.09058e+06	2.26134e+06	1.96864e+06
2	DALYs (Disability-Adjusted Life Years)	44636	Low-middle SDI	2	Female	20	75-79 years	1048	COVID-19	1	Number	2021	1.46637e+06	1.58278e+06	1.38238e+06
2	DALYs (Disability-Adjusted Life Years)	44636	Low-middle SDI	2	Female	30	80-84 years	1048	COVID-19	1	Number	2021	1.17386e+06	1.26086e+06	1.11267e+06
2	DALYs (Disability-Adjusted Life Years)	44636	Low-middle SDI	2	Female	31	85-89 years	1048	COVID-19	1	Number	2021	653958	704435	617834
2	DALYs (Disability-Adjusted Life Years)	44636	Low-middle SDI	2	Female	32	90-94 years	1048	COVID-19	1	Number	2021	347994	374598	328144
2	DALYs (Disability-Adjusted Life Years)	44636	Low-middle SDI	2	Female	235	95+ years	1048	COVID-19	1	Number	2021	126945	137491	119611
2	DALYs (Disability-Adjusted Life Years)	44636	Low-middle SDI	3	Both	1	<5 years	1048	COVID-19	1	Number	2021	658205	889675	551192
2	DALYs (Disability-Adjusted Life Years)	44636	Low-middle SDI	3	Both	6	5-9 years	1048	COVID-19	1	Number	2021	599041	1.04178e+06	373254
2	DALYs (Disability-Adjusted Life Years)	44636	Low-middle SDI	3	Both	7	10-14 years	1048	COVID-19	1	Number	2021	675994	1.15426e+06	438813
2	DALYs (Disability-Adjusted Life Years)	44636	Low-middle SDI	3	Both	8	15-19 years	1048	COVID-19	1	Number	2021	942478	1.40802e+06	756053
2	DALYs (Disability-Adjusted Life Years)	44636	Low-middle SDI	3	Both	9	20-24 years	1048	COVID-19	1	Number	2021	1.5518e+06	2.49625e+06	1.1183e+06
2	DALYs (Disability-Adjusted Life Years)	44636	Low-middle SDI	3	Both	10	25-29 years	1048	COVID-19	1	Number	2021	2.22524e+06	3.06948e+06	1.82523e+06
2	DALYs (Disability-Adjusted Life Years)	44636	Low-middle SDI	3	Both	11	30-34 years	1048	COVID-19	1	Number	2021	3.12688e+06	3.8853e+06	2.72977e+06
2	DALYs (Disability-Adjusted Life Years)	44636	Low-middle SDI	3	Both	12	35-39 years	1048	COVID-19	1	Number	2021	3.77387e+06	4.44578e+06	3.38313e+06
2	DALYs (Disability-Adjusted Life Years)	44636	Low-middle SDI	3	Both	13	40-44 years	1048	COVID-19	1	Number	2021	4.80922e+06	5.40196e+06	4.403e+06
2	DALYs (Disability-Adjusted Life Years)	44636	Low-middle SDI	3	Both	14	45-49 years	1048	COVID-19	1	Number	2021	5.11593e+06	5.65239e+06	4.72643e+06
2	DALYs (Disability-Adjusted Life Years)	44636	Low-middle SDI	3	Both	15	50-54 years	1048	COVID-19	1	Number	2021	5.26686e+06	5.80104e+06	4.87964e+06
2	DALYs (Disability-Adjusted Life Years)	44636	Low-middle SDI	3	Both	16	55-59 years	1048	COVID-19	1	Number	2021	5.79468e+06	6.34932e+06	5.38234e+06
2	DALYs (Disability-Adjusted Life Years)	44636	Low-middle SDI	3	Both	17	60-64 years	1048	COVID-19	1	Number	2021	6.68234e+06	7.30586e+06	6.22153e+06
2	DALYs (Disability-Adjusted Life Years)	44636	Low-middle SDI	3	Both	18	65-69 years	1048	COVID-19	1	Number	2021	6.92096e+06	7.49703e+06	6.48378e+06
2	DALYs (Disability-Adjusted Life Years)	44636	Low-middle SDI	3	Both	19	70-74 years	1048	COVID-19	1	Number	2021	5.89109e+06	6.32188e+06	5.55685e+06
2	DALYs (Disability-Adjusted Life Years)	44636	Low-middle SDI	3	Both	20	75-79 years	1048	COVID-19	1	Number	2021	4.08194e+06	4.38163e+06	3.859e+06
2	DALYs (Disability-Adjusted Life Years)	44636	Low-middle SDI	3	Both	30	80-84 years	1048	COVID-19	1	Number	2021	2.86238e+06	3.06312e+06	2.71073e+06
2	DALYs (Disability-Adjusted Life Years)	44636	Low-middle SDI	3	Both	31	85-89 years	1048	COVID-19	1	Number	2021	1.4564e+06	1.56153e+06	1.37668e+06
2	DALYs (Disability-Adjusted Life Years)	44636	Low-middle SDI	3	Both	32	90-94 years	1048	COVID-19	1	Number	2021	739404	791511	696918
2	DALYs (Disability-Adjusted Life Years)	44636	Low-middle SDI	3	Both	235	95+ years	1048	COVID-19	1	Number	2021	247545	266921	233007
2	DALYs (Disability-Adjusted Life Years)	44637	Low SDI	1	Male	1	<5 years	1048	COVID-19	1	Number	2021	319269	426190	271830
2	DALYs (Disability-Adjusted Life Years)	44637	Low SDI	1	Male	6	5-9 years	1048	COVID-19	1	Number	2021	260616	439032	177623
2	DALYs (Disability-Adjusted Life Years)	44637	Low SDI	1	Male	7	10-14 years	1048	COVID-19	1	Number	2021	290290	462968	208175
2	DALYs (Disability-Adjusted Life Years)	44637	Low SDI	1	Male	8	15-19 years	1048	COVID-19	1	Number	2021	385907	544062	320979
2	DALYs (Disability-Adjusted Life Years)	44637	Low SDI	1	Male	9	20-24 years	1048	COVID-19	1	Number	2021	521550	732512	426505
2	DALYs (Disability-Adjusted Life Years)	44637	Low SDI	1	Male	10	25-29 years	1048	COVID-19	1	Number	2021	835250	1.01906e+06	743160
2	DALYs (Disability-Adjusted Life Years)	44637	Low SDI	1	Male	11	30-34 years	1048	COVID-19	1	Number	2021	1.25975e+06	1.41863e+06	1.15515e+06
2	DALYs (Disability-Adjusted Life Years)	44637	Low SDI	1	Male	12	35-39 years	1048	COVID-19	1	Number	2021	1.46368e+06	1.61699e+06	1.35252e+06
2	DALYs (Disability-Adjusted Life Years)	44637	Low SDI	1	Male	13	40-44 years	1048	COVID-19	1	Number	2021	1.86235e+06	2.01857e+06	1.73529e+06
2	DALYs (Disability-Adjusted Life Years)	44637	Low SDI	1	Male	14	45-49 years	1048	COVID-19	1	Number	2021	1.94722e+06	2.09627e+06	1.81805e+06
2	DALYs (Disability-Adjusted Life Years)	44637	Low SDI	1	Male	15	50-54 years	1048	COVID-19	1	Number	2021	1.92293e+06	2.0642e+06	1.79695e+06
2	DALYs (Disability-Adjusted Life Years)	44637	Low SDI	1	Male	16	55-59 years	1048	COVID-19	1	Number	2021	1.97487e+06	2.11227e+06	1.84842e+06
2	DALYs (Disability-Adjusted Life Years)	44637	Low SDI	1	Male	17	60-64 years	1048	COVID-19	1	Number	2021	2.12453e+06	2.26603e+06	1.9934e+06
2	DALYs (Disability-Adjusted Life Years)	44637	Low SDI	1	Male	18	65-69 years	1048	COVID-19	1	Number	2021	2.16e+06	2.29212e+06	2.03101e+06
2	DALYs (Disability-Adjusted Life Years)	44637	Low SDI	1	Male	19	70-74 years	1048	COVID-19	1	Number	2021	1.67956e+06	1.77423e+06	1.58261e+06
2	DALYs (Disability-Adjusted Life Years)	44637	Low SDI	1	Male	20	75-79 years	1048	COVID-19	1	Number	2021	1.17086e+06	1.23953e+06	1.10071e+06
2	DALYs (Disability-Adjusted Life Years)	44637	Low SDI	1	Male	30	80-84 years	1048	COVID-19	1	Number	2021	725689	769047	680901
2	DALYs (Disability-Adjusted Life Years)	44637	Low SDI	1	Male	31	85-89 years	1048	COVID-19	1	Number	2021	342339	363187	321241
2	DALYs (Disability-Adjusted Life Years)	44637	Low SDI	1	Male	32	90-94 years	1048	COVID-19	1	Number	2021	149923	158848	140923
2	DALYs (Disability-Adjusted Life Years)	44637	Low SDI	1	Male	235	95+ years	1048	COVID-19	1	Number	2021	34102.3	36498.1	31853.8
2	DALYs (Disability-Adjusted Life Years)	44637	Low SDI	2	Female	1	<5 years	1048	COVID-19	1	Number	2021	280981	381552	237453
2	DALYs (Disability-Adjusted Life Years)	44637	Low SDI	2	Female	6	5-9 years	1048	COVID-19	1	Number	2021	209513	391352	127192
2	DALYs (Disability-Adjusted Life Years)	44637	Low SDI	2	Female	7	10-14 years	1048	COVID-19	1	Number	2021	215046	384863	122651
2	DALYs (Disability-Adjusted Life Years)	44637	Low SDI	2	Female	8	15-19 years	1048	COVID-19	1	Number	2021	387325	535194	322806
2	DALYs (Disability-Adjusted Life Years)	44637	Low SDI	2	Female	9	20-24 years	1048	COVID-19	1	Number	2021	578308	953959	400556
2	DALYs (Disability-Adjusted Life Years)	44637	Low SDI	2	Female	10	25-29 years	1048	COVID-19	1	Number	2021	648986	961605	493948
2	DALYs (Disability-Adjusted Life Years)	44637	Low SDI	2	Female	11	30-34 years	1048	COVID-19	1	Number	2021	718971	971840	588353
2	DALYs (Disability-Adjusted Life Years)	44637	Low SDI	2	Female	12	35-39 years	1048	COVID-19	1	Number	2021	832689	1.04561e+06	716894
2	DALYs (Disability-Adjusted Life Years)	44637	Low SDI	2	Female	13	40-44 years	1048	COVID-19	1	Number	2021	973206	1.15018e+06	869234
2	DALYs (Disability-Adjusted Life Years)	44637	Low SDI	2	Female	14	45-49 years	1048	COVID-19	1	Number	2021	970264	1.11465e+06	878690
2	DALYs (Disability-Adjusted Life Years)	44637	Low SDI	2	Female	15	50-54 years	1048	COVID-19	1	Number	2021	908035	1.02946e+06	827057
2	DALYs (Disability-Adjusted Life Years)	44637	Low SDI	2	Female	16	55-59 years	1048	COVID-19	1	Number	2021	932281	1.0331e+06	857317
2	DALYs (Disability-Adjusted Life Years)	44637	Low SDI	2	Female	17	60-64 years	1048	COVID-19	1	Number	2021	1.04369e+06	1.13202e+06	970956
2	DALYs (Disability-Adjusted Life Years)	44637	Low SDI	2	Female	18	65-69 years	1048	COVID-19	1	Number	2021	1.07326e+06	1.15074e+06	1.00517e+06
2	DALYs (Disability-Adjusted Life Years)	44637	Low SDI	2	Female	19	70-74 years	1048	COVID-19	1	Number	2021	893881	951787	839823
2	DALYs (Disability-Adjusted Life Years)	44637	Low SDI	2	Female	20	75-79 years	1048	COVID-19	1	Number	2021	646096	687407	607879
2	DALYs (Disability-Adjusted Life Years)	44637	Low SDI	2	Female	30	80-84 years	1048	COVID-19	1	Number	2021	473306	501770	445882
2	DALYs (Disability-Adjusted Life Years)	44637	Low SDI	2	Female	31	85-89 years	1048	COVID-19	1	Number	2021	257287	272590	242265
2	DALYs (Disability-Adjusted Life Years)	44637	Low SDI	2	Female	32	90-94 years	1048	COVID-19	1	Number	2021	131440	138906	123872
2	DALYs (Disability-Adjusted Life Years)	44637	Low SDI	2	Female	235	95+ years	1048	COVID-19	1	Number	2021	46096.7	48780.9	43155.9
2	DALYs (Disability-Adjusted Life Years)	44637	Low SDI	3	Both	1	<5 years	1048	COVID-19	1	Number	2021	600250	809513	508568
2	DALYs (Disability-Adjusted Life Years)	44637	Low SDI	3	Both	6	5-9 years	1048	COVID-19	1	Number	2021	470129	832084	308267
2	DALYs (Disability-Adjusted Life Years)	44637	Low SDI	3	Both	7	10-14 years	1048	COVID-19	1	Number	2021	505336	854732	334479
2	DALYs (Disability-Adjusted Life Years)	44637	Low SDI	3	Both	8	15-19 years	1048	COVID-19	1	Number	2021	773232	1.07926e+06	643878
2	DALYs (Disability-Adjusted Life Years)	44637	Low SDI	3	Both	9	20-24 years	1048	COVID-19	1	Number	2021	1.09986e+06	1.68468e+06	825134
2	DALYs (Disability-Adjusted Life Years)	44637	Low SDI	3	Both	10	25-29 years	1048	COVID-19	1	Number	2021	1.48424e+06	1.95461e+06	1.24267e+06
2	DALYs (Disability-Adjusted Life Years)	44637	Low SDI	3	Both	11	30-34 years	1048	COVID-19	1	Number	2021	1.97872e+06	2.38813e+06	1.74873e+06
2	DALYs (Disability-Adjusted Life Years)	44637	Low SDI	3	Both	12	35-39 years	1048	COVID-19	1	Number	2021	2.29636e+06	2.66097e+06	2.08032e+06
2	DALYs (Disability-Adjusted Life Years)	44637	Low SDI	3	Both	13	40-44 years	1048	COVID-19	1	Number	2021	2.83556e+06	3.1497e+06	2.60685e+06
2	DALYs (Disability-Adjusted Life Years)	44637	Low SDI	3	Both	14	45-49 years	1048	COVID-19	1	Number	2021	2.91749e+06	3.19712e+06	2.69512e+06
2	DALYs (Disability-Adjusted Life Years)	44637	Low SDI	3	Both	15	50-54 years	1048	COVID-19	1	Number	2021	2.83097e+06	3.08225e+06	2.63204e+06
2	DALYs (Disability-Adjusted Life Years)	44637	Low SDI	3	Both	16	55-59 years	1048	COVID-19	1	Number	2021	2.90715e+06	3.13728e+06	2.71113e+06
2	DALYs (Disability-Adjusted Life Years)	44637	Low SDI	3	Both	17	60-64 years	1048	COVID-19	1	Number	2021	3.16822e+06	3.38903e+06	2.96902e+06
2	DALYs (Disability-Adjusted Life Years)	44637	Low SDI	3	Both	18	65-69 years	1048	COVID-19	1	Number	2021	3.23327e+06	3.43983e+06	3.04066e+06
2	DALYs (Disability-Adjusted Life Years)	44637	Low SDI	3	Both	19	70-74 years	1048	COVID-19	1	Number	2021	2.57344e+06	2.72801e+06	2.42422e+06
2	DALYs (Disability-Adjusted Life Years)	44637	Low SDI	3	Both	20	75-79 years	1048	COVID-19	1	Number	2021	1.81695e+06	1.92552e+06	1.7099e+06
2	DALYs (Disability-Adjusted Life Years)	44637	Low SDI	3	Both	30	80-84 years	1048	COVID-19	1	Number	2021	1.19899e+06	1.26926e+06	1.12682e+06
2	DALYs (Disability-Adjusted Life Years)	44637	Low SDI	3	Both	31	85-89 years	1048	COVID-19	1	Number	2021	599625	634202	563227
2	DALYs (Disability-Adjusted Life Years)	44637	Low SDI	3	Both	32	90-94 years	1048	COVID-19	1	Number	2021	281363	297253	265032
2	DALYs (Disability-Adjusted Life Years)	44637	Low SDI	3	Both	235	95+ years	1048	COVID-19	1	Number	2021	80199.1	85076.5	75289
2	DALYs (Disability-Adjusted Life Years)	44639	Middle SDI	1	Male	1	<5 years	1048	COVID-19	1	Number	2021	236013	315968	196166
2	DALYs (Disability-Adjusted Life Years)	44639	Middle SDI	1	Male	6	5-9 years	1048	COVID-19	1	Number	2021	239628	395462	166271
2	DALYs (Disability-Adjusted Life Years)	44639	Middle SDI	1	Male	7	10-14 years	1048	COVID-19	1	Number	2021	266132	423954	188007
2	DALYs (Disability-Adjusted Life Years)	44639	Middle SDI	1	Male	8	15-19 years	1048	COVID-19	1	Number	2021	291644	458774	218857
2	DALYs (Disability-Adjusted Life Years)	44639	Middle SDI	1	Male	9	20-24 years	1048	COVID-19	1	Number	2021	489360	729563	368544
2	DALYs (Disability-Adjusted Life Years)	44639	Middle SDI	1	Male	10	25-29 years	1048	COVID-19	1	Number	2021	967068	1.2198e+06	827879
2	DALYs (Disability-Adjusted Life Years)	44639	Middle SDI	1	Male	11	30-34 years	1048	COVID-19	1	Number	2021	1.71635e+06	1.98032e+06	1.54691e+06
2	DALYs (Disability-Adjusted Life Years)	44639	Middle SDI	1	Male	12	35-39 years	1048	COVID-19	1	Number	2021	2.25876e+06	2.5456e+06	2.05084e+06
2	DALYs (Disability-Adjusted Life Years)	44639	Middle SDI	1	Male	13	40-44 years	1048	COVID-19	1	Number	2021	2.98688e+06	3.34648e+06	2.72387e+06
2	DALYs (Disability-Adjusted Life Years)	44639	Middle SDI	1	Male	14	45-49 years	1048	COVID-19	1	Number	2021	3.40893e+06	3.82517e+06	3.08873e+06
2	DALYs (Disability-Adjusted Life Years)	44639	Middle SDI	1	Male	15	50-54 years	1048	COVID-19	1	Number	2021	3.71473e+06	4.18343e+06	3.36176e+06
2	DALYs (Disability-Adjusted Life Years)	44639	Middle SDI	1	Male	16	55-59 years	1048	COVID-19	1	Number	2021	4.22976e+06	4.76004e+06	3.84148e+06
2	DALYs (Disability-Adjusted Life Years)	44639	Middle SDI	1	Male	17	60-64 years	1048	COVID-19	1	Number	2021	4.62775e+06	5.22534e+06	4.22562e+06
2	DALYs (Disability-Adjusted Life Years)	44639	Middle SDI	1	Male	18	65-69 years	1048	COVID-19	1	Number	2021	4.4628e+06	5.03699e+06	4.08798e+06
2	DALYs (Disability-Adjusted Life Years)	44639	Middle SDI	1	Male	19	70-74 years	1048	COVID-19	1	Number	2021	3.42893e+06	3.83338e+06	3.15005e+06
2	DALYs (Disability-Adjusted Life Years)	44639	Middle SDI	1	Male	20	75-79 years	1048	COVID-19	1	Number	2021	2.35212e+06	2.61712e+06	2.16301e+06
2	DALYs (Disability-Adjusted Life Years)	44639	Middle SDI	1	Male	30	80-84 years	1048	COVID-19	1	Number	2021	1.6278e+06	1.80281e+06	1.50848e+06
2	DALYs (Disability-Adjusted Life Years)	44639	Middle SDI	1	Male	31	85-89 years	1048	COVID-19	1	Number	2021	924093	1.01179e+06	863347
2	DALYs (Disability-Adjusted Life Years)	44639	Middle SDI	1	Male	32	90-94 years	1048	COVID-19	1	Number	2021	474208	518326	444862
2	DALYs (Disability-Adjusted Life Years)	44639	Middle SDI	1	Male	235	95+ years	1048	COVID-19	1	Number	2021	205760	221510	192685
2	DALYs (Disability-Adjusted Life Years)	44639	Middle SDI	2	Female	1	<5 years	1048	COVID-19	1	Number	2021	203792	276228	168135
2	DALYs (Disability-Adjusted Life Years)	44639	Middle SDI	2	Female	6	5-9 years	1048	COVID-19	1	Number	2021	192342	338931	127543
2	DALYs (Disability-Adjusted Life Years)	44639	Middle SDI	2	Female	7	10-14 years	1048	COVID-19	1	Number	2021	208545	352937	139127
2	DALYs (Disability-Adjusted Life Years)	44639	Middle SDI	2	Female	8	15-19 years	1048	COVID-19	1	Number	2021	275604	430384	213293
2	DALYs (Disability-Adjusted Life Years)	44639	Middle SDI	2	Female	9	20-24 years	1048	COVID-19	1	Number	2021	549720	961422	354306
2	DALYs (Disability-Adjusted Life Years)	44639	Middle SDI	2	Female	10	25-29 years	1048	COVID-19	1	Number	2021	764720	1.17538e+06	568653
2	DALYs (Disability-Adjusted Life Years)	44639	Middle SDI	2	Female	11	30-34 years	1048	COVID-19	1	Number	2021	981880	1.35542e+06	790553
2	DALYs (Disability-Adjusted Life Years)	44639	Middle SDI	2	Female	12	35-39 years	1048	COVID-19	1	Number	2021	1.2701e+06	1.5934e+06	1.08233e+06
2	DALYs (Disability-Adjusted Life Years)	44639	Middle SDI	2	Female	13	40-44 years	1048	COVID-19	1	Number	2021	1.58544e+06	1.91317e+06	1.39933e+06
2	DALYs (Disability-Adjusted Life Years)	44639	Middle SDI	2	Female	14	45-49 years	1048	COVID-19	1	Number	2021	1.77845e+06	2.08795e+06	1.58642e+06
2	DALYs (Disability-Adjusted Life Years)	44639	Middle SDI	2	Female	15	50-54 years	1048	COVID-19	1	Number	2021	1.90394e+06	2.20652e+06	1.70375e+06
2	DALYs (Disability-Adjusted Life Years)	44639	Middle SDI	2	Female	16	55-59 years	1048	COVID-19	1	Number	2021	2.2294e+06	2.53406e+06	2.01136e+06
2	DALYs (Disability-Adjusted Life Years)	44639	Middle SDI	2	Female	17	60-64 years	1048	COVID-19	1	Number	2021	2.54005e+06	2.85357e+06	2.30733e+06
2	DALYs (Disability-Adjusted Life Years)	44639	Middle SDI	2	Female	18	65-69 years	1048	COVID-19	1	Number	2021	2.45034e+06	2.75026e+06	2.24018e+06
2	DALYs (Disability-Adjusted Life Years)	44639	Middle SDI	2	Female	19	70-74 years	1048	COVID-19	1	Number	2021	2.05634e+06	2.30299e+06	1.88827e+06
2	DALYs (Disability-Adjusted Life Years)	44639	Middle SDI	2	Female	20	75-79 years	1048	COVID-19	1	Number	2021	1.48416e+06	1.67546e+06	1.35823e+06
2	DALYs (Disability-Adjusted Life Years)	44639	Middle SDI	2	Female	30	80-84 years	1048	COVID-19	1	Number	2021	1.21993e+06	1.36922e+06	1.12546e+06
2	DALYs (Disability-Adjusted Life Years)	44639	Middle SDI	2	Female	31	85-89 years	1048	COVID-19	1	Number	2021	833127	934243	765282
2	DALYs (Disability-Adjusted Life Years)	44639	Middle SDI	2	Female	32	90-94 years	1048	COVID-19	1	Number	2021	478118	535884	441038
2	DALYs (Disability-Adjusted Life Years)	44639	Middle SDI	2	Female	235	95+ years	1048	COVID-19	1	Number	2021	185542	210707	171236
2	DALYs (Disability-Adjusted Life Years)	44639	Middle SDI	3	Both	1	<5 years	1048	COVID-19	1	Number	2021	439806	592441	364533
2	DALYs (Disability-Adjusted Life Years)	44639	Middle SDI	3	Both	6	5-9 years	1048	COVID-19	1	Number	2021	431970	734392	294982
2	DALYs (Disability-Adjusted Life Years)	44639	Middle SDI	3	Both	7	10-14 years	1048	COVID-19	1	Number	2021	474677	774003	327294
2	DALYs (Disability-Adjusted Life Years)	44639	Middle SDI	3	Both	8	15-19 years	1048	COVID-19	1	Number	2021	567247	890629	433720
2	DALYs (Disability-Adjusted Life Years)	44639	Middle SDI	3	Both	9	20-24 years	1048	COVID-19	1	Number	2021	1.03908e+06	1.68747e+06	726270
2	DALYs (Disability-Adjusted Life Years)	44639	Middle SDI	3	Both	10	25-29 years	1048	COVID-19	1	Number	2021	1.73179e+06	2.37753e+06	1.40623e+06
2	DALYs (Disability-Adjusted Life Years)	44639	Middle SDI	3	Both	11	30-34 years	1048	COVID-19	1	Number	2021	2.69823e+06	3.29976e+06	2.35031e+06
2	DALYs (Disability-Adjusted Life Years)	44639	Middle SDI	3	Both	12	35-39 years	1048	COVID-19	1	Number	2021	3.52886e+06	4.12097e+06	3.1754e+06
2	DALYs (Disability-Adjusted Life Years)	44639	Middle SDI	3	Both	13	40-44 years	1048	COVID-19	1	Number	2021	4.57231e+06	5.1764e+06	4.17521e+06
2	DALYs (Disability-Adjusted Life Years)	44639	Middle SDI	3	Both	14	45-49 years	1048	COVID-19	1	Number	2021	5.18738e+06	5.82295e+06	4.74226e+06
2	DALYs (Disability-Adjusted Life Years)	44639	Middle SDI	3	Both	15	50-54 years	1048	COVID-19	1	Number	2021	5.61867e+06	6.31476e+06	5.12889e+06
2	DALYs (Disability-Adjusted Life Years)	44639	Middle SDI	3	Both	16	55-59 years	1048	COVID-19	1	Number	2021	6.45917e+06	7.24848e+06	5.91614e+06
2	DALYs (Disability-Adjusted Life Years)	44639	Middle SDI	3	Both	17	60-64 years	1048	COVID-19	1	Number	2021	7.1678e+06	8.02236e+06	6.602e+06
2	DALYs (Disability-Adjusted Life Years)	44639	Middle SDI	3	Both	18	65-69 years	1048	COVID-19	1	Number	2021	6.91314e+06	7.74336e+06	6.38325e+06
2	DALYs (Disability-Adjusted Life Years)	44639	Middle SDI	3	Both	19	70-74 years	1048	COVID-19	1	Number	2021	5.48528e+06	6.11297e+06	5.09195e+06
2	DALYs (Disability-Adjusted Life Years)	44639	Middle SDI	3	Both	20	75-79 years	1048	COVID-19	1	Number	2021	3.83628e+06	4.27408e+06	3.56116e+06
2	DALYs (Disability-Adjusted Life Years)	44639	Middle SDI	3	Both	30	80-84 years	1048	COVID-19	1	Number	2021	2.84773e+06	3.16332e+06	2.65206e+06
2	DALYs (Disability-Adjusted Life Years)	44639	Middle SDI	3	Both	31	85-89 years	1048	COVID-19	1	Number	2021	1.75722e+06	1.94244e+06	1.64151e+06
2	DALYs (Disability-Adjusted Life Years)	44639	Middle SDI	3	Both	32	90-94 years	1048	COVID-19	1	Number	2021	952326	1.056e+06	892051
2	DALYs (Disability-Adjusted Life Years)	44639	Middle SDI	3	Both	235	95+ years	1048	COVID-19	1	Number	2021	391302	434311	365774
5	Prevalence	1	Global	1	Male	1	<5 years	1048	COVID-19	1	Number	2020	1.95772e+06	2.32065e+06	1.74678e+06
5	Prevalence	1	Global	1	Male	6	5-9 years	1048	COVID-19	1	Number	2020	3.65194e+06	4.35101e+06	3.25873e+06
5	Prevalence	1	Global	1	Male	7	10-14 years	1048	COVID-19	1	Number	2020	3.67066e+06	4.37952e+06	3.28865e+06
5	Prevalence	1	Global	1	Male	8	15-19 years	1048	COVID-19	1	Number	2020	3.56416e+06	4.25141e+06	3.1934e+06
5	Prevalence	1	Global	1	Male	9	20-24 years	1048	COVID-19	1	Number	2020	3.68185e+06	4.66074e+06	3.16737e+06
5	Prevalence	1	Global	1	Male	10	25-29 years	1048	COVID-19	1	Number	2020	3.41645e+06	4.31333e+06	2.94499e+06
5	Prevalence	1	Global	1	Male	11	30-34 years	1048	COVID-19	1	Number	2020	3.17926e+06	3.99772e+06	2.74426e+06
5	Prevalence	1	Global	1	Male	12	35-39 years	1048	COVID-19	1	Number	2020	2.86033e+06	3.58012e+06	2.47172e+06
5	Prevalence	1	Global	1	Male	13	40-44 years	1048	COVID-19	1	Number	2020	2.48874e+06	3.09987e+06	2.15574e+06
5	Prevalence	1	Global	1	Male	14	45-49 years	1048	COVID-19	1	Number	2020	2.19398e+06	2.72599e+06	1.90417e+06
5	Prevalence	1	Global	1	Male	15	50-54 years	1048	COVID-19	1	Number	2020	1.93254e+06	2.40165e+06	1.67736e+06
5	Prevalence	1	Global	1	Male	16	55-59 years	1048	COVID-19	1	Number	2020	1.71068e+06	2.12104e+06	1.48348e+06
5	Prevalence	1	Global	1	Male	17	60-64 years	1048	COVID-19	1	Number	2020	1.41947e+06	1.75215e+06	1.23258e+06
5	Prevalence	1	Global	1	Male	18	65-69 years	1048	COVID-19	1	Number	2020	1.03441e+06	1.26756e+06	902979
5	Prevalence	1	Global	1	Male	19	70-74 years	1048	COVID-19	1	Number	2020	682908	824391	598167
5	Prevalence	1	Global	1	Male	20	75-79 years	1048	COVID-19	1	Number	2020	413106	494797	364294
5	Prevalence	1	Global	1	Male	30	80-84 years	1048	COVID-19	1	Number	2020	248088	292942	220023
5	Prevalence	1	Global	1	Male	31	85-89 years	1048	COVID-19	1	Number	2020	116091	134968	102853
5	Prevalence	1	Global	1	Male	32	90-94 years	1048	COVID-19	1	Number	2020	41464.5	47847.3	36741.4
5	Prevalence	1	Global	1	Male	235	95+ years	1048	COVID-19	1	Number	2020	11361.8	13153.4	9966.76
5	Prevalence	1	Global	2	Female	1	<5 years	1048	COVID-19	1	Number	2020	1.85892e+06	2.20099e+06	1.65993e+06
5	Prevalence	1	Global	2	Female	6	5-9 years	1048	COVID-19	1	Number	2020	3.4662e+06	4.12625e+06	3.09519e+06
5	Prevalence	1	Global	2	Female	7	10-14 years	1048	COVID-19	1	Number	2020	3.49122e+06	4.15982e+06	3.12866e+06
5	Prevalence	1	Global	2	Female	8	15-19 years	1048	COVID-19	1	Number	2020	3.43763e+06	4.09591e+06	3.08383e+06
5	Prevalence	1	Global	2	Female	9	20-24 years	1048	COVID-19	1	Number	2020	4.38488e+06	5.87073e+06	3.45404e+06
5	Prevalence	1	Global	2	Female	10	25-29 years	1048	COVID-19	1	Number	2020	4.12633e+06	5.50306e+06	3.25377e+06
5	Prevalence	1	Global	2	Female	11	30-34 years	1048	COVID-19	1	Number	2020	3.80849e+06	5.0604e+06	3.01244e+06
5	Prevalence	1	Global	2	Female	12	35-39 years	1048	COVID-19	1	Number	2020	3.4032e+06	4.51444e+06	2.69949e+06
5	Prevalence	1	Global	2	Female	13	40-44 years	1048	COVID-19	1	Number	2020	2.93516e+06	3.88976e+06	2.339e+06
5	Prevalence	1	Global	2	Female	14	45-49 years	1048	COVID-19	1	Number	2020	2.58082e+06	3.4186e+06	2.06317e+06
5	Prevalence	1	Global	2	Female	15	50-54 years	1048	COVID-19	1	Number	2020	2.30744e+06	3.06114e+06	1.84738e+06
5	Prevalence	1	Global	2	Female	16	55-59 years	1048	COVID-19	1	Number	2020	2.09988e+06	2.78715e+06	1.68713e+06
5	Prevalence	1	Global	2	Female	17	60-64 years	1048	COVID-19	1	Number	2020	1.78404e+06	2.35632e+06	1.44268e+06
5	Prevalence	1	Global	2	Female	18	65-69 years	1048	COVID-19	1	Number	2020	1.32951e+06	1.74256e+06	1.08306e+06
5	Prevalence	1	Global	2	Female	19	70-74 years	1048	COVID-19	1	Number	2020	898345	1.16152e+06	738048
5	Prevalence	1	Global	2	Female	20	75-79 years	1048	COVID-19	1	Number	2020	565928	724219	468410
5	Prevalence	1	Global	2	Female	30	80-84 years	1048	COVID-19	1	Number	2020	386031	487469	322794
5	Prevalence	1	Global	2	Female	31	85-89 years	1048	COVID-19	1	Number	2020	192592	238589	162507
5	Prevalence	1	Global	2	Female	32	90-94 years	1048	COVID-19	1	Number	2020	79478.7	96636.6	67793.2
5	Prevalence	1	Global	2	Female	235	95+ years	1048	COVID-19	1	Number	2020	25400.2	30599.1	21759.3
5	Prevalence	1	Global	3	Both	1	<5 years	1048	COVID-19	1	Number	2020	3.81664e+06	4.52164e+06	3.40653e+06
5	Prevalence	1	Global	3	Both	6	5-9 years	1048	COVID-19	1	Number	2020	7.11813e+06	8.47726e+06	6.35392e+06
5	Prevalence	1	Global	3	Both	7	10-14 years	1048	COVID-19	1	Number	2020	7.16188e+06	8.53934e+06	6.41841e+06
5	Prevalence	1	Global	3	Both	8	15-19 years	1048	COVID-19	1	Number	2020	7.00179e+06	8.34733e+06	6.27737e+06
5	Prevalence	1	Global	3	Both	9	20-24 years	1048	COVID-19	1	Number	2020	8.06673e+06	1.05641e+07	6.64739e+06
5	Prevalence	1	Global	3	Both	10	25-29 years	1048	COVID-19	1	Number	2020	7.54278e+06	9.84003e+06	6.22593e+06
5	Prevalence	1	Global	3	Both	11	30-34 years	1048	COVID-19	1	Number	2020	6.98775e+06	9.08288e+06	5.78077e+06
5	Prevalence	1	Global	3	Both	12	35-39 years	1048	COVID-19	1	Number	2020	6.26354e+06	8.1251e+06	5.1878e+06
5	Prevalence	1	Global	3	Both	13	40-44 years	1048	COVID-19	1	Number	2020	5.4239e+06	7.02408e+06	4.50846e+06
5	Prevalence	1	Global	3	Both	14	45-49 years	1048	COVID-19	1	Number	2020	4.7748e+06	6.17902e+06	3.97453e+06
5	Prevalence	1	Global	3	Both	15	50-54 years	1048	COVID-19	1	Number	2020	4.23998e+06	5.48814e+06	3.53454e+06
5	Prevalence	1	Global	3	Both	16	55-59 years	1048	COVID-19	1	Number	2020	3.81056e+06	4.93474e+06	3.17891e+06
5	Prevalence	1	Global	3	Both	17	60-64 years	1048	COVID-19	1	Number	2020	3.2035e+06	4.12867e+06	2.68059e+06
5	Prevalence	1	Global	3	Both	18	65-69 years	1048	COVID-19	1	Number	2020	2.36391e+06	3.02133e+06	1.9879e+06
5	Prevalence	1	Global	3	Both	19	70-74 years	1048	COVID-19	1	Number	2020	1.58125e+06	1.99292e+06	1.33631e+06
5	Prevalence	1	Global	3	Both	20	75-79 years	1048	COVID-19	1	Number	2020	979034	1.22504e+06	830293
5	Prevalence	1	Global	3	Both	30	80-84 years	1048	COVID-19	1	Number	2020	634119	780494	541175
5	Prevalence	1	Global	3	Both	31	85-89 years	1048	COVID-19	1	Number	2020	308683	372758	265725
5	Prevalence	1	Global	3	Both	32	90-94 years	1048	COVID-19	1	Number	2020	120943	144240	104805
5	Prevalence	1	Global	3	Both	235	95+ years	1048	COVID-19	1	Number	2020	36761.9	43480.3	31958.1
5	Prevalence	44634	High-middle SDI	1	Male	1	<5 years	1048	COVID-19	1	Number	2020	108786	133273	93056.5
5	Prevalence	44634	High-middle SDI	1	Male	6	5-9 years	1048	COVID-19	1	Number	2020	226978	277019	194615
5	Prevalence	44634	High-middle SDI	1	Male	7	10-14 years	1048	COVID-19	1	Number	2020	232930	282977	200928
5	Prevalence	44634	High-middle SDI	1	Male	8	15-19 years	1048	COVID-19	1	Number	2020	227914	276845	196821
5	Prevalence	44634	High-middle SDI	1	Male	9	20-24 years	1048	COVID-19	1	Number	2020	247524	315109	206106
5	Prevalence	44634	High-middle SDI	1	Male	10	25-29 years	1048	COVID-19	1	Number	2020	267083	339209	223661
5	Prevalence	44634	High-middle SDI	1	Male	11	30-34 years	1048	COVID-19	1	Number	2020	299995	379999	252588
5	Prevalence	44634	High-middle SDI	1	Male	12	35-39 years	1048	COVID-19	1	Number	2020	285742	359432	241062
5	Prevalence	44634	High-middle SDI	1	Male	13	40-44 years	1048	COVID-19	1	Number	2020	265382	333253	224588
5	Prevalence	44634	High-middle SDI	1	Male	14	45-49 years	1048	COVID-19	1	Number	2020	252989	317107	214662
5	Prevalence	44634	High-middle SDI	1	Male	15	50-54 years	1048	COVID-19	1	Number	2020	242846	304861	205788
5	Prevalence	44634	High-middle SDI	1	Male	16	55-59 years	1048	COVID-19	1	Number	2020	259694	323167	217835
5	Prevalence	44634	High-middle SDI	1	Male	17	60-64 years	1048	COVID-19	1	Number	2020	243636	301638	205673
5	Prevalence	44634	High-middle SDI	1	Male	18	65-69 years	1048	COVID-19	1	Number	2020	179062	221048	151643
5	Prevalence	44634	High-middle SDI	1	Male	19	70-74 years	1048	COVID-19	1	Number	2020	118602	144933	100774
5	Prevalence	44634	High-middle SDI	1	Male	20	75-79 years	1048	COVID-19	1	Number	2020	63590.2	77563.9	53729.2
5	Prevalence	44634	High-middle SDI	1	Male	30	80-84 years	1048	COVID-19	1	Number	2020	47635.9	57561.3	40719.7
5	Prevalence	44634	High-middle SDI	1	Male	31	85-89 years	1048	COVID-19	1	Number	2020	22126.9	26827.4	18772.3
5	Prevalence	44634	High-middle SDI	1	Male	32	90-94 years	1048	COVID-19	1	Number	2020	8518.72	10230.8	7204
5	Prevalence	44634	High-middle SDI	1	Male	235	95+ years	1048	COVID-19	1	Number	2020	1876.04	2270	1560.24
5	Prevalence	44634	High-middle SDI	2	Female	1	<5 years	1048	COVID-19	1	Number	2020	102413	125503	87575.5
5	Prevalence	44634	High-middle SDI	2	Female	6	5-9 years	1048	COVID-19	1	Number	2020	212954	260007	182409
5	Prevalence	44634	High-middle SDI	2	Female	7	10-14 years	1048	COVID-19	1	Number	2020	218170	265182	187918
5	Prevalence	44634	High-middle SDI	2	Female	8	15-19 years	1048	COVID-19	1	Number	2020	213376	259080	183915
5	Prevalence	44634	High-middle SDI	2	Female	9	20-24 years	1048	COVID-19	1	Number	2020	273591	379628	212144
5	Prevalence	44634	High-middle SDI	2	Female	10	25-29 years	1048	COVID-19	1	Number	2020	297393	409789	232783
5	Prevalence	44634	High-middle SDI	2	Female	11	30-34 years	1048	COVID-19	1	Number	2020	338149	463404	266541
5	Prevalence	44634	High-middle SDI	2	Female	12	35-39 years	1048	COVID-19	1	Number	2020	327233	445743	258401
5	Prevalence	44634	High-middle SDI	2	Female	13	40-44 years	1048	COVID-19	1	Number	2020	308478	419008	244071
5	Prevalence	44634	High-middle SDI	2	Female	14	45-49 years	1048	COVID-19	1	Number	2020	298942	405441	236224
5	Prevalence	44634	High-middle SDI	2	Female	15	50-54 years	1048	COVID-19	1	Number	2020	295068	400589	233153
5	Prevalence	44634	High-middle SDI	2	Female	16	55-59 years	1048	COVID-19	1	Number	2020	338082	458097	266429
5	Prevalence	44634	High-middle SDI	2	Female	17	60-64 years	1048	COVID-19	1	Number	2020	341010	456628	269980
5	Prevalence	44634	High-middle SDI	2	Female	18	65-69 years	1048	COVID-19	1	Number	2020	272809	363259	217773
5	Prevalence	44634	High-middle SDI	2	Female	19	70-74 years	1048	COVID-19	1	Number	2020	195304	255536	157340
5	Prevalence	44634	High-middle SDI	2	Female	20	75-79 years	1048	COVID-19	1	Number	2020	115352	149990	93047.5
5	Prevalence	44634	High-middle SDI	2	Female	30	80-84 years	1048	COVID-19	1	Number	2020	105801	133465	87763.2
5	Prevalence	44634	High-middle SDI	2	Female	31	85-89 years	1048	COVID-19	1	Number	2020	50538.4	62472.2	42119.8
5	Prevalence	44634	High-middle SDI	2	Female	32	90-94 years	1048	COVID-19	1	Number	2020	21719.9	26368.8	18241.4
5	Prevalence	44634	High-middle SDI	2	Female	235	95+ years	1048	COVID-19	1	Number	2020	5724.71	7124.72	4771.62
5	Prevalence	44634	High-middle SDI	3	Both	1	<5 years	1048	COVID-19	1	Number	2020	211199	258777	180632
5	Prevalence	44634	High-middle SDI	3	Both	6	5-9 years	1048	COVID-19	1	Number	2020	439933	537026	376937
5	Prevalence	44634	High-middle SDI	3	Both	7	10-14 years	1048	COVID-19	1	Number	2020	451100	548107	388853
5	Prevalence	44634	High-middle SDI	3	Both	8	15-19 years	1048	COVID-19	1	Number	2020	441290	535911	380739
5	Prevalence	44634	High-middle SDI	3	Both	9	20-24 years	1048	COVID-19	1	Number	2020	521115	693956	417407
5	Prevalence	44634	High-middle SDI	3	Both	10	25-29 years	1048	COVID-19	1	Number	2020	564476	752056	456835
5	Prevalence	44634	High-middle SDI	3	Both	11	30-34 years	1048	COVID-19	1	Number	2020	638144	844104	520483
5	Prevalence	44634	High-middle SDI	3	Both	12	35-39 years	1048	COVID-19	1	Number	2020	612975	805486	499113
5	Prevalence	44634	High-middle SDI	3	Both	13	40-44 years	1048	COVID-19	1	Number	2020	573860	751645	469578
5	Prevalence	44634	High-middle SDI	3	Both	14	45-49 years	1048	COVID-19	1	Number	2020	551931	723209	451264
5	Prevalence	44634	High-middle SDI	3	Both	15	50-54 years	1048	COVID-19	1	Number	2020	537914	705680	440288
5	Prevalence	44634	High-middle SDI	3	Both	16	55-59 years	1048	COVID-19	1	Number	2020	597775	781097	484731
5	Prevalence	44634	High-middle SDI	3	Both	17	60-64 years	1048	COVID-19	1	Number	2020	584646	758422	476983
5	Prevalence	44634	High-middle SDI	3	Both	18	65-69 years	1048	COVID-19	1	Number	2020	451872	578743	369480
5	Prevalence	44634	High-middle SDI	3	Both	19	70-74 years	1048	COVID-19	1	Number	2020	313906	396922	258451
5	Prevalence	44634	High-middle SDI	3	Both	20	75-79 years	1048	COVID-19	1	Number	2020	178942	226031	147716
5	Prevalence	44634	High-middle SDI	3	Both	30	80-84 years	1048	COVID-19	1	Number	2020	153437	189662	128801
5	Prevalence	44634	High-middle SDI	3	Both	31	85-89 years	1048	COVID-19	1	Number	2020	72665.4	88681.9	61053.2
5	Prevalence	44634	High-middle SDI	3	Both	32	90-94 years	1048	COVID-19	1	Number	2020	30238.6	36446.4	25680.9
5	Prevalence	44634	High-middle SDI	3	Both	235	95+ years	1048	COVID-19	1	Number	2020	7600.74	9344.2	6368.44
5	Prevalence	44635	High SDI	1	Male	1	<5 years	1048	COVID-19	1	Number	2020	80732.1	92456.8	72687.2
5	Prevalence	44635	High SDI	1	Male	6	5-9 years	1048	COVID-19	1	Number	2020	139711	160210	125647
5	Prevalence	44635	High SDI	1	Male	7	10-14 years	1048	COVID-19	1	Number	2020	168422	192568	152056
5	Prevalence	44635	High SDI	1	Male	8	15-19 years	1048	COVID-19	1	Number	2020	185471	212339	167282
5	Prevalence	44635	High SDI	1	Male	9	20-24 years	1048	COVID-19	1	Number	2020	203426	246204	177437
5	Prevalence	44635	High SDI	1	Male	10	25-29 years	1048	COVID-19	1	Number	2020	207639	253446	180722
5	Prevalence	44635	High SDI	1	Male	11	30-34 years	1048	COVID-19	1	Number	2020	215218	260395	185825
5	Prevalence	44635	High SDI	1	Male	12	35-39 years	1048	COVID-19	1	Number	2020	213307	258429	183803
5	Prevalence	44635	High SDI	1	Male	13	40-44 years	1048	COVID-19	1	Number	2020	202015	242962	174534
5	Prevalence	44635	High SDI	1	Male	14	45-49 years	1048	COVID-19	1	Number	2020	195069	232626	170233
5	Prevalence	44635	High SDI	1	Male	15	50-54 years	1048	COVID-19	1	Number	2020	188391	223981	165163
5	Prevalence	44635	High SDI	1	Male	16	55-59 years	1048	COVID-19	1	Number	2020	180745	213893	158860
5	Prevalence	44635	High SDI	1	Male	17	60-64 years	1048	COVID-19	1	Number	2020	157580	185306	139020
5	Prevalence	44635	High SDI	1	Male	18	65-69 years	1048	COVID-19	1	Number	2020	127110	148294	112412
5	Prevalence	44635	High SDI	1	Male	19	70-74 years	1048	COVID-19	1	Number	2020	99668.8	114925	88768.2
5	Prevalence	44635	High SDI	1	Male	20	75-79 years	1048	COVID-19	1	Number	2020	63687.7	73146.7	56878.3
5	Prevalence	44635	High SDI	1	Male	30	80-84 years	1048	COVID-19	1	Number	2020	42065.2	47656.4	37701.3
5	Prevalence	44635	High SDI	1	Male	31	85-89 years	1048	COVID-19	1	Number	2020	23322.1	26208.8	20879.3
5	Prevalence	44635	High SDI	1	Male	32	90-94 years	1048	COVID-19	1	Number	2020	9734.59	11023.7	8748.47
5	Prevalence	44635	High SDI	1	Male	235	95+ years	1048	COVID-19	1	Number	2020	2876	3262.39	2562.27
5	Prevalence	44635	High SDI	2	Female	1	<5 years	1048	COVID-19	1	Number	2020	77081.5	88231.2	69436.8
5	Prevalence	44635	High SDI	2	Female	6	5-9 years	1048	COVID-19	1	Number	2020	133016	152340	119656
5	Prevalence	44635	High SDI	2	Female	7	10-14 years	1048	COVID-19	1	Number	2020	160040	183227	144697
5	Prevalence	44635	High SDI	2	Female	8	15-19 years	1048	COVID-19	1	Number	2020	174763	200332	158271
5	Prevalence	44635	High SDI	2	Female	9	20-24 years	1048	COVID-19	1	Number	2020	222203	293793	179740
5	Prevalence	44635	High SDI	2	Female	10	25-29 years	1048	COVID-19	1	Number	2020	226290	300679	183164
5	Prevalence	44635	High SDI	2	Female	11	30-34 years	1048	COVID-19	1	Number	2020	226475	300021	183117
5	Prevalence	44635	High SDI	2	Female	12	35-39 years	1048	COVID-19	1	Number	2020	223418	293938	181175
5	Prevalence	44635	High SDI	2	Female	13	40-44 years	1048	COVID-19	1	Number	2020	211833	277155	172752
5	Prevalence	44635	High SDI	2	Female	14	45-49 years	1048	COVID-19	1	Number	2020	210074	272021	171654
5	Prevalence	44635	High SDI	2	Female	15	50-54 years	1048	COVID-19	1	Number	2020	208440	268555	170684
5	Prevalence	44635	High SDI	2	Female	16	55-59 years	1048	COVID-19	1	Number	2020	206427	264099	169731
5	Prevalence	44635	High SDI	2	Female	17	60-64 years	1048	COVID-19	1	Number	2020	186410	235666	154813
5	Prevalence	44635	High SDI	2	Female	18	65-69 years	1048	COVID-19	1	Number	2020	156571	194980	130374
5	Prevalence	44635	High SDI	2	Female	19	70-74 years	1048	COVID-19	1	Number	2020	127262	157370	106553
5	Prevalence	44635	High SDI	2	Female	20	75-79 years	1048	COVID-19	1	Number	2020	86596.6	106507	73112.4
5	Prevalence	44635	High SDI	2	Female	30	80-84 years	1048	COVID-19	1	Number	2020	64048.1	77885.4	54431.7
5	Prevalence	44635	High SDI	2	Female	31	85-89 years	1048	COVID-19	1	Number	2020	42026	50652.5	35964
5	Prevalence	44635	High SDI	2	Female	32	90-94 years	1048	COVID-19	1	Number	2020	22094.9	26246.3	19024
5	Prevalence	44635	High SDI	2	Female	235	95+ years	1048	COVID-19	1	Number	2020	8699.99	10218.6	7613.39
5	Prevalence	44635	High SDI	3	Both	1	<5 years	1048	COVID-19	1	Number	2020	157814	180689	142124
5	Prevalence	44635	High SDI	3	Both	6	5-9 years	1048	COVID-19	1	Number	2020	272727	312550	245240
5	Prevalence	44635	High SDI	3	Both	7	10-14 years	1048	COVID-19	1	Number	2020	328462	375795	296755
5	Prevalence	44635	High SDI	3	Both	8	15-19 years	1048	COVID-19	1	Number	2020	360234	412667	325600
5	Prevalence	44635	High SDI	3	Both	9	20-24 years	1048	COVID-19	1	Number	2020	425630	538794	358046
5	Prevalence	44635	High SDI	3	Both	10	25-29 years	1048	COVID-19	1	Number	2020	433929	548725	363859
5	Prevalence	44635	High SDI	3	Both	11	30-34 years	1048	COVID-19	1	Number	2020	441692	555973	371376
5	Prevalence	44635	High SDI	3	Both	12	35-39 years	1048	COVID-19	1	Number	2020	436725	547176	367929
5	Prevalence	44635	High SDI	3	Both	13	40-44 years	1048	COVID-19	1	Number	2020	413849	516897	349426
5	Prevalence	44635	High SDI	3	Both	14	45-49 years	1048	COVID-19	1	Number	2020	405143	504293	341870
5	Prevalence	44635	High SDI	3	Both	15	50-54 years	1048	COVID-19	1	Number	2020	396831	494348	336355
5	Prevalence	44635	High SDI	3	Both	16	55-59 years	1048	COVID-19	1	Number	2020	387172	480125	329475
5	Prevalence	44635	High SDI	3	Both	17	60-64 years	1048	COVID-19	1	Number	2020	343991	421979	293080
5	Prevalence	44635	High SDI	3	Both	18	65-69 years	1048	COVID-19	1	Number	2020	283681	343510	243370
5	Prevalence	44635	High SDI	3	Both	19	70-74 years	1048	COVID-19	1	Number	2020	226930	274744	195647
5	Prevalence	44635	High SDI	3	Both	20	75-79 years	1048	COVID-19	1	Number	2020	150284	179726	130388
5	Prevalence	44635	High SDI	3	Both	30	80-84 years	1048	COVID-19	1	Number	2020	106113	125053	92262.8
5	Prevalence	44635	High SDI	3	Both	31	85-89 years	1048	COVID-19	1	Number	2020	65348	76708.4	56968.7
5	Prevalence	44635	High SDI	3	Both	32	90-94 years	1048	COVID-19	1	Number	2020	31829.5	36940.2	27844.3
5	Prevalence	44635	High SDI	3	Both	235	95+ years	1048	COVID-19	1	Number	2020	11576	13411.9	10218.6
5	Prevalence	44636	Low-middle SDI	1	Male	1	<5 years	1048	COVID-19	1	Number	2020	736758	894322	620377
5	Prevalence	44636	Low-middle SDI	1	Male	6	5-9 years	1048	COVID-19	1	Number	2020	1.40437e+06	1.70713e+06	1.18836e+06
5	Prevalence	44636	Low-middle SDI	1	Male	7	10-14 years	1048	COVID-19	1	Number	2020	1.43128e+06	1.74093e+06	1.22124e+06
5	Prevalence	44636	Low-middle SDI	1	Male	8	15-19 years	1048	COVID-19	1	Number	2020	1.3941e+06	1.69534e+06	1.19063e+06
5	Prevalence	44636	Low-middle SDI	1	Male	9	20-24 years	1048	COVID-19	1	Number	2020	1.43536e+06	1.87086e+06	1.18449e+06
5	Prevalence	44636	Low-middle SDI	1	Male	10	25-29 years	1048	COVID-19	1	Number	2020	1.29716e+06	1.68621e+06	1.07372e+06
5	Prevalence	44636	Low-middle SDI	1	Male	11	30-34 years	1048	COVID-19	1	Number	2020	1.17427e+06	1.51911e+06	974092
5	Prevalence	44636	Low-middle SDI	1	Male	12	35-39 years	1048	COVID-19	1	Number	2020	1.04399e+06	1.34539e+06	866310
5	Prevalence	44636	Low-middle SDI	1	Male	13	40-44 years	1048	COVID-19	1	Number	2020	892468	1.14702e+06	741819
5	Prevalence	44636	Low-middle SDI	1	Male	14	45-49 years	1048	COVID-19	1	Number	2020	768692	987894	639009
5	Prevalence	44636	Low-middle SDI	1	Male	15	50-54 years	1048	COVID-19	1	Number	2020	663278	852510	547889
5	Prevalence	44636	Low-middle SDI	1	Male	16	55-59 years	1048	COVID-19	1	Number	2020	561816	722164	458376
5	Prevalence	44636	Low-middle SDI	1	Male	17	60-64 years	1048	COVID-19	1	Number	2020	453244	578771	367398
5	Prevalence	44636	Low-middle SDI	1	Male	18	65-69 years	1048	COVID-19	1	Number	2020	329133	416503	268895
5	Prevalence	44636	Low-middle SDI	1	Male	19	70-74 years	1048	COVID-19	1	Number	2020	210749	263600	174560
5	Prevalence	44636	Low-middle SDI	1	Male	20	75-79 years	1048	COVID-19	1	Number	2020	128457	158865	106800
5	Prevalence	44636	Low-middle SDI	1	Male	30	80-84 years	1048	COVID-19	1	Number	2020	69080.6	84124.7	57583.8
5	Prevalence	44636	Low-middle SDI	1	Male	31	85-89 years	1048	COVID-19	1	Number	2020	29600.3	36198	24518.1
5	Prevalence	44636	Low-middle SDI	1	Male	32	90-94 years	1048	COVID-19	1	Number	2020	9642.87	11716.5	7917.13
5	Prevalence	44636	Low-middle SDI	1	Male	235	95+ years	1048	COVID-19	1	Number	2020	2749.45	3361.65	2209.02
5	Prevalence	44636	Low-middle SDI	2	Female	1	<5 years	1048	COVID-19	1	Number	2020	695129	843235	585397
5	Prevalence	44636	Low-middle SDI	2	Female	6	5-9 years	1048	COVID-19	1	Number	2020	1.324e+06	1.60787e+06	1.12245e+06
5	Prevalence	44636	Low-middle SDI	2	Female	7	10-14 years	1048	COVID-19	1	Number	2020	1.35101e+06	1.6435e+06	1.15315e+06
5	Prevalence	44636	Low-middle SDI	2	Female	8	15-19 years	1048	COVID-19	1	Number	2020	1.34161e+06	1.63275e+06	1.14909e+06
5	Prevalence	44636	Low-middle SDI	2	Female	9	20-24 years	1048	COVID-19	1	Number	2020	1.72845e+06	2.38431e+06	1.32262e+06
5	Prevalence	44636	Low-middle SDI	2	Female	10	25-29 years	1048	COVID-19	1	Number	2020	1.58931e+06	2.1904e+06	1.22132e+06
5	Prevalence	44636	Low-middle SDI	2	Female	11	30-34 years	1048	COVID-19	1	Number	2020	1.42213e+06	1.95096e+06	1.09652e+06
5	Prevalence	44636	Low-middle SDI	2	Female	12	35-39 years	1048	COVID-19	1	Number	2020	1.25427e+06	1.71511e+06	968948
5	Prevalence	44636	Low-middle SDI	2	Female	13	40-44 years	1048	COVID-19	1	Number	2020	1.07041e+06	1.46583e+06	828950
5	Prevalence	44636	Low-middle SDI	2	Female	14	45-49 years	1048	COVID-19	1	Number	2020	918752	1.26058e+06	711825
5	Prevalence	44636	Low-middle SDI	2	Female	15	50-54 years	1048	COVID-19	1	Number	2020	794726	1.08929e+06	611788
5	Prevalence	44636	Low-middle SDI	2	Female	16	55-59 years	1048	COVID-19	1	Number	2020	681979	933103	527951
5	Prevalence	44636	Low-middle SDI	2	Female	17	60-64 years	1048	COVID-19	1	Number	2020	554526	751618	429276
5	Prevalence	44636	Low-middle SDI	2	Female	18	65-69 years	1048	COVID-19	1	Number	2020	401411	535255	311155
5	Prevalence	44636	Low-middle SDI	2	Female	19	70-74 years	1048	COVID-19	1	Number	2020	256557	338231	202653
5	Prevalence	44636	Low-middle SDI	2	Female	20	75-79 years	1048	COVID-19	1	Number	2020	160363	210162	127765
5	Prevalence	44636	Low-middle SDI	2	Female	30	80-84 years	1048	COVID-19	1	Number	2020	91676.2	117822	74207.3
5	Prevalence	44636	Low-middle SDI	2	Female	31	85-89 years	1048	COVID-19	1	Number	2020	39008.7	49345.8	31991.9
5	Prevalence	44636	Low-middle SDI	2	Female	32	90-94 years	1048	COVID-19	1	Number	2020	13432.3	16689.3	11115.9
5	Prevalence	44636	Low-middle SDI	2	Female	235	95+ years	1048	COVID-19	1	Number	2020	4711.16	5828.41	3877.55
5	Prevalence	44636	Low-middle SDI	3	Both	1	<5 years	1048	COVID-19	1	Number	2020	1.43189e+06	1.73756e+06	1.20591e+06
5	Prevalence	44636	Low-middle SDI	3	Both	6	5-9 years	1048	COVID-19	1	Number	2020	2.72838e+06	3.315e+06	2.311e+06
5	Prevalence	44636	Low-middle SDI	3	Both	7	10-14 years	1048	COVID-19	1	Number	2020	2.78229e+06	3.38477e+06	2.37494e+06
5	Prevalence	44636	Low-middle SDI	3	Both	8	15-19 years	1048	COVID-19	1	Number	2020	2.73571e+06	3.32794e+06	2.33869e+06
5	Prevalence	44636	Low-middle SDI	3	Both	9	20-24 years	1048	COVID-19	1	Number	2020	3.16381e+06	4.20911e+06	2.51243e+06
5	Prevalence	44636	Low-middle SDI	3	Both	10	25-29 years	1048	COVID-19	1	Number	2020	2.88647e+06	3.82369e+06	2.29781e+06
5	Prevalence	44636	Low-middle SDI	3	Both	11	30-34 years	1048	COVID-19	1	Number	2020	2.5964e+06	3.42756e+06	2.07169e+06
5	Prevalence	44636	Low-middle SDI	3	Both	12	35-39 years	1048	COVID-19	1	Number	2020	2.29826e+06	3.02324e+06	1.83616e+06
5	Prevalence	44636	Low-middle SDI	3	Both	13	40-44 years	1048	COVID-19	1	Number	2020	1.96288e+06	2.57894e+06	1.5733e+06
5	Prevalence	44636	Low-middle SDI	3	Both	14	45-49 years	1048	COVID-19	1	Number	2020	1.68744e+06	2.21871e+06	1.35148e+06
5	Prevalence	44636	Low-middle SDI	3	Both	15	50-54 years	1048	COVID-19	1	Number	2020	1.458e+06	1.91665e+06	1.16118e+06
5	Prevalence	44636	Low-middle SDI	3	Both	16	55-59 years	1048	COVID-19	1	Number	2020	1.2438e+06	1.63897e+06	982286
5	Prevalence	44636	Low-middle SDI	3	Both	17	60-64 years	1048	COVID-19	1	Number	2020	1.00777e+06	1.32584e+06	792829
5	Prevalence	44636	Low-middle SDI	3	Both	18	65-69 years	1048	COVID-19	1	Number	2020	730544	950427	581924
5	Prevalence	44636	Low-middle SDI	3	Both	19	70-74 years	1048	COVID-19	1	Number	2020	467307	601811	378384
5	Prevalence	44636	Low-middle SDI	3	Both	20	75-79 years	1048	COVID-19	1	Number	2020	288820	370337	234667
5	Prevalence	44636	Low-middle SDI	3	Both	30	80-84 years	1048	COVID-19	1	Number	2020	160757	203598	132108
5	Prevalence	44636	Low-middle SDI	3	Both	31	85-89 years	1048	COVID-19	1	Number	2020	68609.1	84310.1	57020.3
5	Prevalence	44636	Low-middle SDI	3	Both	32	90-94 years	1048	COVID-19	1	Number	2020	23075.1	28160.1	19290.1
5	Prevalence	44636	Low-middle SDI	3	Both	235	95+ years	1048	COVID-19	1	Number	2020	7460.61	9076.59	6226.85
5	Prevalence	44637	Low SDI	1	Male	1	<5 years	1048	COVID-19	1	Number	2020	620552	737121	545653
5	Prevalence	44637	Low SDI	1	Male	6	5-9 years	1048	COVID-19	1	Number	2020	1.03851e+06	1.23662e+06	909399
5	Prevalence	44637	Low SDI	1	Male	7	10-14 years	1048	COVID-19	1	Number	2020	979919	1.16842e+06	856563
5	Prevalence	44637	Low SDI	1	Male	8	15-19 years	1048	COVID-19	1	Number	2020	896022	1.06727e+06	782868
5	Prevalence	44637	Low SDI	1	Male	9	20-24 years	1048	COVID-19	1	Number	2020	849197	1.06638e+06	719052
5	Prevalence	44637	Low SDI	1	Male	10	25-29 years	1048	COVID-19	1	Number	2020	710854	892569	601383
5	Prevalence	44637	Low SDI	1	Male	11	30-34 years	1048	COVID-19	1	Number	2020	594841	746438	501731
5	Prevalence	44637	Low SDI	1	Male	12	35-39 years	1048	COVID-19	1	Number	2020	502344	631448	422795
5	Prevalence	44637	Low SDI	1	Male	13	40-44 years	1048	COVID-19	1	Number	2020	418834	526549	352068
5	Prevalence	44637	Low SDI	1	Male	14	45-49 years	1048	COVID-19	1	Number	2020	350555	439350	294646
5	Prevalence	44637	Low SDI	1	Male	15	50-54 years	1048	COVID-19	1	Number	2020	283102	354383	238145
5	Prevalence	44637	Low SDI	1	Male	16	55-59 years	1048	COVID-19	1	Number	2020	222000	277444	187116
5	Prevalence	44637	Low SDI	1	Male	17	60-64 years	1048	COVID-19	1	Number	2020	169152	210521	142468
5	Prevalence	44637	Low SDI	1	Male	18	65-69 years	1048	COVID-19	1	Number	2020	121876	150826	102037
5	Prevalence	44637	Low SDI	1	Male	19	70-74 years	1048	COVID-19	1	Number	2020	76311.2	93888.6	63789.4
5	Prevalence	44637	Low SDI	1	Male	20	75-79 years	1048	COVID-19	1	Number	2020	46093.8	56345.6	38541.2
5	Prevalence	44637	Low SDI	1	Male	30	80-84 years	1048	COVID-19	1	Number	2020	23311.1	27992.4	19525.3
5	Prevalence	44637	Low SDI	1	Male	31	85-89 years	1048	COVID-19	1	Number	2020	9062.58	10872.7	7592.82
5	Prevalence	44637	Low SDI	1	Male	32	90-94 years	1048	COVID-19	1	Number	2020	2447.83	2924.46	2058.98
5	Prevalence	44637	Low SDI	1	Male	235	95+ years	1048	COVID-19	1	Number	2020	463.492	559.444	387.78
5	Prevalence	44637	Low SDI	2	Female	1	<5 years	1048	COVID-19	1	Number	2020	597676	709104	526075
5	Prevalence	44637	Low SDI	2	Female	6	5-9 years	1048	COVID-19	1	Number	2020	1.00488e+06	1.19527e+06	880867
5	Prevalence	44637	Low SDI	2	Female	7	10-14 years	1048	COVID-19	1	Number	2020	956356	1.13801e+06	837721
5	Prevalence	44637	Low SDI	2	Female	8	15-19 years	1048	COVID-19	1	Number	2020	891103	1.05999e+06	781363
5	Prevalence	44637	Low SDI	2	Female	9	20-24 years	1048	COVID-19	1	Number	2020	1.05617e+06	1.42259e+06	814930
5	Prevalence	44637	Low SDI	2	Female	10	25-29 years	1048	COVID-19	1	Number	2020	905314	1.21961e+06	700808
5	Prevalence	44637	Low SDI	2	Female	11	30-34 years	1048	COVID-19	1	Number	2020	759619	1.02047e+06	588468
5	Prevalence	44637	Low SDI	2	Female	12	35-39 years	1048	COVID-19	1	Number	2020	635052	853308	491693
5	Prevalence	44637	Low SDI	2	Female	13	40-44 years	1048	COVID-19	1	Number	2020	509082	683060	394396
5	Prevalence	44637	Low SDI	2	Female	14	45-49 years	1048	COVID-19	1	Number	2020	409512	549785	316996
5	Prevalence	44637	Low SDI	2	Female	15	50-54 years	1048	COVID-19	1	Number	2020	330471	443678	256388
5	Prevalence	44637	Low SDI	2	Female	16	55-59 years	1048	COVID-19	1	Number	2020	264324	353664	205989
5	Prevalence	44637	Low SDI	2	Female	17	60-64 years	1048	COVID-19	1	Number	2020	201089	268094	157479
5	Prevalence	44637	Low SDI	2	Female	18	65-69 years	1048	COVID-19	1	Number	2020	144415	192041	113523
5	Prevalence	44637	Low SDI	2	Female	19	70-74 years	1048	COVID-19	1	Number	2020	89416.1	117585	70736.4
5	Prevalence	44637	Low SDI	2	Female	20	75-79 years	1048	COVID-19	1	Number	2020	55464.6	71997.4	44213.4
5	Prevalence	44637	Low SDI	2	Female	30	80-84 years	1048	COVID-19	1	Number	2020	29362.1	37479.8	23443.2
5	Prevalence	44637	Low SDI	2	Female	31	85-89 years	1048	COVID-19	1	Number	2020	11635.9	14712.7	9292.57
5	Prevalence	44637	Low SDI	2	Female	32	90-94 years	1048	COVID-19	1	Number	2020	3260.58	4071.71	2620.98
5	Prevalence	44637	Low SDI	2	Female	235	95+ years	1048	COVID-19	1	Number	2020	788.39	976.519	639.902
5	Prevalence	44637	Low SDI	3	Both	1	<5 years	1048	COVID-19	1	Number	2020	1.21823e+06	1.44623e+06	1.07169e+06
5	Prevalence	44637	Low SDI	3	Both	6	5-9 years	1048	COVID-19	1	Number	2020	2.04338e+06	2.43186e+06	1.79118e+06
5	Prevalence	44637	Low SDI	3	Both	7	10-14 years	1048	COVID-19	1	Number	2020	1.93627e+06	2.30643e+06	1.69548e+06
5	Prevalence	44637	Low SDI	3	Both	8	15-19 years	1048	COVID-19	1	Number	2020	1.78713e+06	2.1278e+06	1.5641e+06
5	Prevalence	44637	Low SDI	3	Both	9	20-24 years	1048	COVID-19	1	Number	2020	1.90537e+06	2.49468e+06	1.53162e+06
5	Prevalence	44637	Low SDI	3	Both	10	25-29 years	1048	COVID-19	1	Number	2020	1.61617e+06	2.11766e+06	1.30568e+06
5	Prevalence	44637	Low SDI	3	Both	11	30-34 years	1048	COVID-19	1	Number	2020	1.35446e+06	1.77217e+06	1.09442e+06
5	Prevalence	44637	Low SDI	3	Both	12	35-39 years	1048	COVID-19	1	Number	2020	1.1374e+06	1.48723e+06	916385
5	Prevalence	44637	Low SDI	3	Both	13	40-44 years	1048	COVID-19	1	Number	2020	927915	1.21112e+06	748457
5	Prevalence	44637	Low SDI	3	Both	14	45-49 years	1048	COVID-19	1	Number	2020	760067	988808	612961
5	Prevalence	44637	Low SDI	3	Both	15	50-54 years	1048	COVID-19	1	Number	2020	613572	797491	494320
5	Prevalence	44637	Low SDI	3	Both	16	55-59 years	1048	COVID-19	1	Number	2020	486325	632015	393322
5	Prevalence	44637	Low SDI	3	Both	17	60-64 years	1048	COVID-19	1	Number	2020	370241	478750	300704
5	Prevalence	44637	Low SDI	3	Both	18	65-69 years	1048	COVID-19	1	Number	2020	266291	340414	215911
5	Prevalence	44637	Low SDI	3	Both	19	70-74 years	1048	COVID-19	1	Number	2020	165727	209538	134832
5	Prevalence	44637	Low SDI	3	Both	20	75-79 years	1048	COVID-19	1	Number	2020	101558	128037	82613.6
5	Prevalence	44637	Low SDI	3	Both	30	80-84 years	1048	COVID-19	1	Number	2020	52673.2	66071.4	42902.2
5	Prevalence	44637	Low SDI	3	Both	31	85-89 years	1048	COVID-19	1	Number	2020	20698.5	25613.9	16892.1
5	Prevalence	44637	Low SDI	3	Both	32	90-94 years	1048	COVID-19	1	Number	2020	5708.4	7001.69	4702.78
5	Prevalence	44637	Low SDI	3	Both	235	95+ years	1048	COVID-19	1	Number	2020	1251.88	1521.28	1031.88
5	Prevalence	44639	Middle SDI	1	Male	1	<5 years	1048	COVID-19	1	Number	2020	409916	486695	362339
5	Prevalence	44639	Middle SDI	1	Male	6	5-9 years	1048	COVID-19	1	Number	2020	840505	991483	744685
5	Prevalence	44639	Middle SDI	1	Male	7	10-14 years	1048	COVID-19	1	Number	2020	856244	1.0043e+06	757960
5	Prevalence	44639	Middle SDI	1	Male	8	15-19 years	1048	COVID-19	1	Number	2020	858860	1.00672e+06	761573
5	Prevalence	44639	Middle SDI	1	Male	9	20-24 years	1048	COVID-19	1	Number	2020	944445	1.17162e+06	800042
5	Prevalence	44639	Middle SDI	1	Male	10	25-29 years	1048	COVID-19	1	Number	2020	931807	1.1544e+06	791202
5	Prevalence	44639	Middle SDI	1	Male	11	30-34 years	1048	COVID-19	1	Number	2020	893061	1.10442e+06	759448
5	Prevalence	44639	Middle SDI	1	Male	12	35-39 years	1048	COVID-19	1	Number	2020	813193	1.00366e+06	693273
5	Prevalence	44639	Middle SDI	1	Male	13	40-44 years	1048	COVID-19	1	Number	2020	708385	872962	606176
5	Prevalence	44639	Middle SDI	1	Male	14	45-49 years	1048	COVID-19	1	Number	2020	625135	770204	534960
5	Prevalence	44639	Middle SDI	1	Male	15	50-54 years	1048	COVID-19	1	Number	2020	553455	681295	473607
5	Prevalence	44639	Middle SDI	1	Male	16	55-59 years	1048	COVID-19	1	Number	2020	485001	595339	414771
5	Prevalence	44639	Middle SDI	1	Male	17	60-64 years	1048	COVID-19	1	Number	2020	394483	480578	338349
5	Prevalence	44639	Middle SDI	1	Male	18	65-69 years	1048	COVID-19	1	Number	2020	276137	332834	237719
5	Prevalence	44639	Middle SDI	1	Male	19	70-74 years	1048	COVID-19	1	Number	2020	176842	212151	153031
5	Prevalence	44639	Middle SDI	1	Male	20	75-79 years	1048	COVID-19	1	Number	2020	110840	132074	95872.5
5	Prevalence	44639	Middle SDI	1	Male	30	80-84 years	1048	COVID-19	1	Number	2020	65724.5	78101.1	57176.8
5	Prevalence	44639	Middle SDI	1	Male	31	85-89 years	1048	COVID-19	1	Number	2020	31845.2	37546.1	27790.6
5	Prevalence	44639	Middle SDI	1	Male	32	90-94 years	1048	COVID-19	1	Number	2020	11075.2	12914.3	9672.26
5	Prevalence	44639	Middle SDI	1	Male	235	95+ years	1048	COVID-19	1	Number	2020	3385.13	3940.32	2926.34
5	Prevalence	44639	Middle SDI	2	Female	1	<5 years	1048	COVID-19	1	Number	2020	385684	458133	341071
5	Prevalence	44639	Middle SDI	2	Female	6	5-9 years	1048	COVID-19	1	Number	2020	789573	931582	699449
5	Prevalence	44639	Middle SDI	2	Female	7	10-14 years	1048	COVID-19	1	Number	2020	803881	943672	711567
5	Prevalence	44639	Middle SDI	2	Female	8	15-19 years	1048	COVID-19	1	Number	2020	815071	954594	722734
5	Prevalence	44639	Middle SDI	2	Female	9	20-24 years	1048	COVID-19	1	Number	2020	1.10227e+06	1.4955e+06	855244
5	Prevalence	44639	Middle SDI	2	Female	10	25-29 years	1048	COVID-19	1	Number	2020	1.10584e+06	1.49813e+06	860863
5	Prevalence	44639	Middle SDI	2	Female	11	30-34 years	1048	COVID-19	1	Number	2020	1.05999e+06	1.43449e+06	828448
5	Prevalence	44639	Middle SDI	2	Female	12	35-39 years	1048	COVID-19	1	Number	2020	961247	1.29846e+06	754185
5	Prevalence	44639	Middle SDI	2	Female	13	40-44 years	1048	COVID-19	1	Number	2020	833499	1.12243e+06	655920
5	Prevalence	44639	Middle SDI	2	Female	14	45-49 years	1048	COVID-19	1	Number	2020	741825	996759	583843
5	Prevalence	44639	Middle SDI	2	Female	15	50-54 years	1048	COVID-19	1	Number	2020	677075	908798	532954
5	Prevalence	44639	Middle SDI	2	Female	16	55-59 years	1048	COVID-19	1	Number	2020	607411	815621	480099
5	Prevalence	44639	Middle SDI	2	Female	17	60-64 years	1048	COVID-19	1	Number	2020	499338	670088	396936
5	Prevalence	44639	Middle SDI	2	Female	18	65-69 years	1048	COVID-19	1	Number	2020	352903	471511	283274
5	Prevalence	44639	Middle SDI	2	Female	19	70-74 years	1048	COVID-19	1	Number	2020	228797	301852	185076
5	Prevalence	44639	Middle SDI	2	Female	20	75-79 years	1048	COVID-19	1	Number	2020	147499	192564	120050
5	Prevalence	44639	Middle SDI	2	Female	30	80-84 years	1048	COVID-19	1	Number	2020	94681.7	122338	77911.1
5	Prevalence	44639	Middle SDI	2	Female	31	85-89 years	1048	COVID-19	1	Number	2020	49129.5	62636.8	40763.8
5	Prevalence	44639	Middle SDI	2	Female	32	90-94 years	1048	COVID-19	1	Number	2020	18873.4	23778.3	15714.1
5	Prevalence	44639	Middle SDI	2	Female	235	95+ years	1048	COVID-19	1	Number	2020	5447.2	6813.99	4540.73
5	Prevalence	44639	Middle SDI	3	Both	1	<5 years	1048	COVID-19	1	Number	2020	795599	944827	703577
5	Prevalence	44639	Middle SDI	3	Both	6	5-9 years	1048	COVID-19	1	Number	2020	1.63008e+06	1.92306e+06	1.44426e+06
5	Prevalence	44639	Middle SDI	3	Both	7	10-14 years	1048	COVID-19	1	Number	2020	1.66013e+06	1.94716e+06	1.46953e+06
5	Prevalence	44639	Middle SDI	3	Both	8	15-19 years	1048	COVID-19	1	Number	2020	1.67393e+06	1.96132e+06	1.48431e+06
5	Prevalence	44639	Middle SDI	3	Both	9	20-24 years	1048	COVID-19	1	Number	2020	2.04671e+06	2.69474e+06	1.6602e+06
5	Prevalence	44639	Middle SDI	3	Both	10	25-29 years	1048	COVID-19	1	Number	2020	2.03765e+06	2.67617e+06	1.655e+06
5	Prevalence	44639	Middle SDI	3	Both	11	30-34 years	1048	COVID-19	1	Number	2020	1.95305e+06	2.55402e+06	1.59224e+06
5	Prevalence	44639	Middle SDI	3	Both	12	35-39 years	1048	COVID-19	1	Number	2020	1.77444e+06	2.31291e+06	1.45234e+06
5	Prevalence	44639	Middle SDI	3	Both	13	40-44 years	1048	COVID-19	1	Number	2020	1.54188e+06	2.00407e+06	1.26477e+06
5	Prevalence	44639	Middle SDI	3	Both	14	45-49 years	1048	COVID-19	1	Number	2020	1.36696e+06	1.77644e+06	1.12164e+06
5	Prevalence	44639	Middle SDI	3	Both	15	50-54 years	1048	COVID-19	1	Number	2020	1.23053e+06	1.60396e+06	1.00963e+06
5	Prevalence	44639	Middle SDI	3	Both	16	55-59 years	1048	COVID-19	1	Number	2020	1.09241e+06	1.42802e+06	898359
5	Prevalence	44639	Middle SDI	3	Both	17	60-64 years	1048	COVID-19	1	Number	2020	893821	1.16451e+06	738479
5	Prevalence	44639	Middle SDI	3	Both	18	65-69 years	1048	COVID-19	1	Number	2020	629040	814498	520820
5	Prevalence	44639	Middle SDI	3	Both	19	70-74 years	1048	COVID-19	1	Number	2020	405639	516519	338873
5	Prevalence	44639	Middle SDI	3	Both	20	75-79 years	1048	COVID-19	1	Number	2020	258340	324778	216778
5	Prevalence	44639	Middle SDI	3	Both	30	80-84 years	1048	COVID-19	1	Number	2020	160406	198495	135166
5	Prevalence	44639	Middle SDI	3	Both	31	85-89 years	1048	COVID-19	1	Number	2020	80974.7	99615.7	68529.9
5	Prevalence	44639	Middle SDI	3	Both	32	90-94 years	1048	COVID-19	1	Number	2020	29948.6	36550.8	25419.5
5	Prevalence	44639	Middle SDI	3	Both	235	95+ years	1048	COVID-19	1	Number	2020	8832.33	10695.2	7476.11
5	Prevalence	1	Global	1	Male	1	<5 years	1048	COVID-19	1	Number	2021	3.20019e+06	4.21698e+06	2.68387e+06
5	Prevalence	1	Global	1	Male	6	5-9 years	1048	COVID-19	1	Number	2021	6.09724e+06	8.02159e+06	5.10023e+06
5	Prevalence	1	Global	1	Male	7	10-14 years	1048	COVID-19	1	Number	2021	6.18831e+06	8.12711e+06	5.17562e+06
5	Prevalence	1	Global	1	Male	8	15-19 years	1048	COVID-19	1	Number	2021	6.04023e+06	7.92167e+06	5.06105e+06
5	Prevalence	1	Global	1	Male	9	20-24 years	1048	COVID-19	1	Number	2021	6.6495e+06	9.42135e+06	5.12216e+06
5	Prevalence	1	Global	1	Male	10	25-29 years	1048	COVID-19	1	Number	2021	6.19201e+06	8.74633e+06	4.80448e+06
5	Prevalence	1	Global	1	Male	11	30-34 years	1048	COVID-19	1	Number	2021	5.79855e+06	8.12703e+06	4.53865e+06
5	Prevalence	1	Global	1	Male	12	35-39 years	1048	COVID-19	1	Number	2021	5.26294e+06	7.31689e+06	4.13738e+06
5	Prevalence	1	Global	1	Male	13	40-44 years	1048	COVID-19	1	Number	2021	4.59341e+06	6.35005e+06	3.61311e+06
5	Prevalence	1	Global	1	Male	14	45-49 years	1048	COVID-19	1	Number	2021	4.05564e+06	5.5985e+06	3.19439e+06
5	Prevalence	1	Global	1	Male	15	50-54 years	1048	COVID-19	1	Number	2021	3.56721e+06	4.91061e+06	2.82008e+06
5	Prevalence	1	Global	1	Male	16	55-59 years	1048	COVID-19	1	Number	2021	3.18328e+06	4.37151e+06	2.52573e+06
5	Prevalence	1	Global	1	Male	17	60-64 years	1048	COVID-19	1	Number	2021	2.68101e+06	3.67032e+06	2.13949e+06
5	Prevalence	1	Global	1	Male	18	65-69 years	1048	COVID-19	1	Number	2021	1.98612e+06	2.68042e+06	1.58808e+06
5	Prevalence	1	Global	1	Male	19	70-74 years	1048	COVID-19	1	Number	2021	1.33429e+06	1.76087e+06	1.06902e+06
5	Prevalence	1	Global	1	Male	20	75-79 years	1048	COVID-19	1	Number	2021	818865	1.0687e+06	655983
5	Prevalence	1	Global	1	Male	30	80-84 years	1048	COVID-19	1	Number	2021	508768	671587	406158
5	Prevalence	1	Global	1	Male	31	85-89 years	1048	COVID-19	1	Number	2021	239694	314923	189253
5	Prevalence	1	Global	1	Male	32	90-94 years	1048	COVID-19	1	Number	2021	86306.7	114555	67368.1
5	Prevalence	1	Global	1	Male	235	95+ years	1048	COVID-19	1	Number	2021	22487.8	29790.6	17530.6
5	Prevalence	1	Global	2	Female	1	<5 years	1048	COVID-19	1	Number	2021	3.04763e+06	4.01011e+06	2.56091e+06
5	Prevalence	1	Global	2	Female	6	5-9 years	1048	COVID-19	1	Number	2021	5.79621e+06	7.62126e+06	4.85296e+06
5	Prevalence	1	Global	2	Female	7	10-14 years	1048	COVID-19	1	Number	2021	5.89032e+06	7.73248e+06	4.93222e+06
5	Prevalence	1	Global	2	Female	8	15-19 years	1048	COVID-19	1	Number	2021	5.8401e+06	7.65483e+06	4.90168e+06
5	Prevalence	1	Global	2	Female	9	20-24 years	1048	COVID-19	1	Number	2021	8.75786e+06	1.33955e+07	5.97669e+06
5	Prevalence	1	Global	2	Female	10	25-29 years	1048	COVID-19	1	Number	2021	8.26174e+06	1.25937e+07	5.70539e+06
5	Prevalence	1	Global	2	Female	11	30-34 years	1048	COVID-19	1	Number	2021	7.66551e+06	1.16262e+07	5.35014e+06
5	Prevalence	1	Global	2	Female	12	35-39 years	1048	COVID-19	1	Number	2021	6.89104e+06	1.03855e+07	4.84837e+06
5	Prevalence	1	Global	2	Female	13	40-44 years	1048	COVID-19	1	Number	2021	5.96845e+06	8.95175e+06	4.24074e+06
5	Prevalence	1	Global	2	Female	14	45-49 years	1048	COVID-19	1	Number	2021	5.25427e+06	7.87316e+06	3.74544e+06
5	Prevalence	1	Global	2	Female	15	50-54 years	1048	COVID-19	1	Number	2021	4.69871e+06	7.05526e+06	3.35247e+06
5	Prevalence	1	Global	2	Female	16	55-59 years	1048	COVID-19	1	Number	2021	4.32378e+06	6.47237e+06	3.10094e+06
5	Prevalence	1	Global	2	Female	17	60-64 years	1048	COVID-19	1	Number	2021	3.74325e+06	5.51856e+06	2.71675e+06
5	Prevalence	1	Global	2	Female	18	65-69 years	1048	COVID-19	1	Number	2021	2.84667e+06	4.12798e+06	2.09547e+06
5	Prevalence	1	Global	2	Female	19	70-74 years	1048	COVID-19	1	Number	2021	1.96363e+06	2.80536e+06	1.45928e+06
5	Prevalence	1	Global	2	Female	20	75-79 years	1048	COVID-19	1	Number	2021	1.25828e+06	1.74373e+06	951162
5	Prevalence	1	Global	2	Female	30	80-84 years	1048	COVID-19	1	Number	2021	899296	1.21586e+06	682776
5	Prevalence	1	Global	2	Female	31	85-89 years	1048	COVID-19	1	Number	2021	452072	603801	345058
5	Prevalence	1	Global	2	Female	32	90-94 years	1048	COVID-19	1	Number	2021	187072	248806	144231
5	Prevalence	1	Global	2	Female	235	95+ years	1048	COVID-19	1	Number	2021	56894.8	75560.7	44212.4
5	Prevalence	1	Global	3	Both	1	<5 years	1048	COVID-19	1	Number	2021	6.24782e+06	8.22709e+06	5.24367e+06
5	Prevalence	1	Global	3	Both	6	5-9 years	1048	COVID-19	1	Number	2021	1.18934e+07	1.56428e+07	9.95319e+06
5	Prevalence	1	Global	3	Both	7	10-14 years	1048	COVID-19	1	Number	2021	1.20786e+07	1.58596e+07	1.01081e+07
5	Prevalence	1	Global	3	Both	8	15-19 years	1048	COVID-19	1	Number	2021	1.18803e+07	1.55765e+07	9.96041e+06
5	Prevalence	1	Global	3	Both	9	20-24 years	1048	COVID-19	1	Number	2021	1.54074e+07	2.29665e+07	1.11582e+07
5	Prevalence	1	Global	3	Both	10	25-29 years	1048	COVID-19	1	Number	2021	1.44538e+07	2.14284e+07	1.05525e+07
5	Prevalence	1	Global	3	Both	11	30-34 years	1048	COVID-19	1	Number	2021	1.34641e+07	1.98047e+07	9.9048e+06
5	Prevalence	1	Global	3	Both	12	35-39 years	1048	COVID-19	1	Number	2021	1.2154e+07	1.77523e+07	9.03098e+06
5	Prevalence	1	Global	3	Both	13	40-44 years	1048	COVID-19	1	Number	2021	1.05619e+07	1.53243e+07	7.90297e+06
5	Prevalence	1	Global	3	Both	14	45-49 years	1048	COVID-19	1	Number	2021	9.30991e+06	1.34655e+07	6.99035e+06
5	Prevalence	1	Global	3	Both	15	50-54 years	1048	COVID-19	1	Number	2021	8.26591e+06	1.19452e+07	6.19814e+06
5	Prevalence	1	Global	3	Both	16	55-59 years	1048	COVID-19	1	Number	2021	7.50705e+06	1.08003e+07	5.6668e+06
5	Prevalence	1	Global	3	Both	17	60-64 years	1048	COVID-19	1	Number	2021	6.42426e+06	9.16646e+06	4.87688e+06
5	Prevalence	1	Global	3	Both	18	65-69 years	1048	COVID-19	1	Number	2021	4.83279e+06	6.80758e+06	3.68565e+06
5	Prevalence	1	Global	3	Both	19	70-74 years	1048	COVID-19	1	Number	2021	3.29792e+06	4.54956e+06	2.53753e+06
5	Prevalence	1	Global	3	Both	20	75-79 years	1048	COVID-19	1	Number	2021	2.07715e+06	2.8118e+06	1.59858e+06
5	Prevalence	1	Global	3	Both	30	80-84 years	1048	COVID-19	1	Number	2021	1.40806e+06	1.88954e+06	1.09241e+06
5	Prevalence	1	Global	3	Both	31	85-89 years	1048	COVID-19	1	Number	2021	691766	915692	537341
5	Prevalence	1	Global	3	Both	32	90-94 years	1048	COVID-19	1	Number	2021	273379	360518	212523
5	Prevalence	1	Global	3	Both	235	95+ years	1048	COVID-19	1	Number	2021	79382.6	103297	62190.9
5	Prevalence	44634	High-middle SDI	1	Male	1	<5 years	1048	COVID-19	1	Number	2021	223705	295556	185037
5	Prevalence	44634	High-middle SDI	1	Male	6	5-9 years	1048	COVID-19	1	Number	2021	472645	623075	390285
5	Prevalence	44634	High-middle SDI	1	Male	7	10-14 years	1048	COVID-19	1	Number	2021	481562	631626	397946
5	Prevalence	44634	High-middle SDI	1	Male	8	15-19 years	1048	COVID-19	1	Number	2021	468287	613139	386957
5	Prevalence	44634	High-middle SDI	1	Male	9	20-24 years	1048	COVID-19	1	Number	2021	541710	762931	416369
5	Prevalence	44634	High-middle SDI	1	Male	10	25-29 years	1048	COVID-19	1	Number	2021	590149	824341	459651
5	Prevalence	44634	High-middle SDI	1	Male	11	30-34 years	1048	COVID-19	1	Number	2021	666837	924167	523375
5	Prevalence	44634	High-middle SDI	1	Male	12	35-39 years	1048	COVID-19	1	Number	2021	635557	874740	501021
5	Prevalence	44634	High-middle SDI	1	Male	13	40-44 years	1048	COVID-19	1	Number	2021	585007	802832	462087
5	Prevalence	44634	High-middle SDI	1	Male	14	45-49 years	1048	COVID-19	1	Number	2021	554064	760181	438515
5	Prevalence	44634	High-middle SDI	1	Male	15	50-54 years	1048	COVID-19	1	Number	2021	530058	729143	419666
5	Prevalence	44634	High-middle SDI	1	Male	16	55-59 years	1048	COVID-19	1	Number	2021	572539	785387	453658
5	Prevalence	44634	High-middle SDI	1	Male	17	60-64 years	1048	COVID-19	1	Number	2021	544679	740107	432220
5	Prevalence	44634	High-middle SDI	1	Male	18	65-69 years	1048	COVID-19	1	Number	2021	403033	540476	318946
5	Prevalence	44634	High-middle SDI	1	Male	19	70-74 years	1048	COVID-19	1	Number	2021	267325	354456	211211
5	Prevalence	44634	High-middle SDI	1	Male	20	75-79 years	1048	COVID-19	1	Number	2021	143785	188808	113678
5	Prevalence	44634	High-middle SDI	1	Male	30	80-84 years	1048	COVID-19	1	Number	2021	112704	148061	88109.2
5	Prevalence	44634	High-middle SDI	1	Male	31	85-89 years	1048	COVID-19	1	Number	2021	51415.6	67592.3	39980.2
5	Prevalence	44634	High-middle SDI	1	Male	32	90-94 years	1048	COVID-19	1	Number	2021	20427.4	27009.2	15673.7
5	Prevalence	44634	High-middle SDI	1	Male	235	95+ years	1048	COVID-19	1	Number	2021	4575.31	6066.99	3493.38
5	Prevalence	44634	High-middle SDI	2	Female	1	<5 years	1048	COVID-19	1	Number	2021	211675	279103	174991
5	Prevalence	44634	High-middle SDI	2	Female	6	5-9 years	1048	COVID-19	1	Number	2021	444996	586996	367296
5	Prevalence	44634	High-middle SDI	2	Female	7	10-14 years	1048	COVID-19	1	Number	2021	453638	594917	375262
5	Prevalence	44634	High-middle SDI	2	Female	8	15-19 years	1048	COVID-19	1	Number	2021	442142	578906	365629
5	Prevalence	44634	High-middle SDI	2	Female	9	20-24 years	1048	COVID-19	1	Number	2021	670100	1.02062e+06	461034
5	Prevalence	44634	High-middle SDI	2	Female	10	25-29 years	1048	COVID-19	1	Number	2021	732168	1.11867e+06	506963
5	Prevalence	44634	High-middle SDI	2	Female	11	30-34 years	1048	COVID-19	1	Number	2021	832902	1.2684e+06	585590
5	Prevalence	44634	High-middle SDI	2	Female	12	35-39 years	1048	COVID-19	1	Number	2021	803969	1.21566e+06	571531
5	Prevalence	44634	High-middle SDI	2	Female	13	40-44 years	1048	COVID-19	1	Number	2021	753523	1.13275e+06	540879
5	Prevalence	44634	High-middle SDI	2	Female	14	45-49 years	1048	COVID-19	1	Number	2021	726913	1.09226e+06	523033
5	Prevalence	44634	High-middle SDI	2	Female	15	50-54 years	1048	COVID-19	1	Number	2021	716870	1.07954e+06	515446
5	Prevalence	44634	High-middle SDI	2	Female	16	55-59 years	1048	COVID-19	1	Number	2021	829674	1.25113e+06	597957
5	Prevalence	44634	High-middle SDI	2	Female	17	60-64 years	1048	COVID-19	1	Number	2021	850220	1.2672e+06	619119
5	Prevalence	44634	High-middle SDI	2	Female	18	65-69 years	1048	COVID-19	1	Number	2021	686321	1.00297e+06	505556
5	Prevalence	44634	High-middle SDI	2	Female	19	70-74 years	1048	COVID-19	1	Number	2021	492951	705078	365870
5	Prevalence	44634	High-middle SDI	2	Female	20	75-79 years	1048	COVID-19	1	Number	2021	294908	415680	219595
5	Prevalence	44634	High-middle SDI	2	Female	30	80-84 years	1048	COVID-19	1	Number	2021	280461	388214	211112
5	Prevalence	44634	High-middle SDI	2	Female	31	85-89 years	1048	COVID-19	1	Number	2021	131169	176574	99724.5
5	Prevalence	44634	High-middle SDI	2	Female	32	90-94 years	1048	COVID-19	1	Number	2021	57282.7	76359	43790.5
5	Prevalence	44634	High-middle SDI	2	Female	235	95+ years	1048	COVID-19	1	Number	2021	14348.1	19272.8	10855.7
5	Prevalence	44634	High-middle SDI	3	Both	1	<5 years	1048	COVID-19	1	Number	2021	435381	574610	360028
5	Prevalence	44634	High-middle SDI	3	Both	6	5-9 years	1048	COVID-19	1	Number	2021	917641	1.21007e+06	757525
5	Prevalence	44634	High-middle SDI	3	Both	7	10-14 years	1048	COVID-19	1	Number	2021	935200	1.22654e+06	773208
5	Prevalence	44634	High-middle SDI	3	Both	8	15-19 years	1048	COVID-19	1	Number	2021	910430	1.19204e+06	752586
5	Prevalence	44634	High-middle SDI	3	Both	9	20-24 years	1048	COVID-19	1	Number	2021	1.21181e+06	1.78949e+06	877405
5	Prevalence	44634	High-middle SDI	3	Both	10	25-29 years	1048	COVID-19	1	Number	2021	1.32232e+06	1.9432e+06	965474
5	Prevalence	44634	High-middle SDI	3	Both	11	30-34 years	1048	COVID-19	1	Number	2021	1.49974e+06	2.19944e+06	1.11111e+06
5	Prevalence	44634	High-middle SDI	3	Both	12	35-39 years	1048	COVID-19	1	Number	2021	1.43953e+06	2.0929e+06	1.07492e+06
5	Prevalence	44634	High-middle SDI	3	Both	13	40-44 years	1048	COVID-19	1	Number	2021	1.33853e+06	1.92997e+06	1.0066e+06
5	Prevalence	44634	High-middle SDI	3	Both	14	45-49 years	1048	COVID-19	1	Number	2021	1.28098e+06	1.84609e+06	964233
5	Prevalence	44634	High-middle SDI	3	Both	15	50-54 years	1048	COVID-19	1	Number	2021	1.24693e+06	1.80165e+06	936692
5	Prevalence	44634	High-middle SDI	3	Both	16	55-59 years	1048	COVID-19	1	Number	2021	1.40221e+06	2.03117e+06	1.05267e+06
5	Prevalence	44634	High-middle SDI	3	Both	17	60-64 years	1048	COVID-19	1	Number	2021	1.3949e+06	1.99935e+06	1.05426e+06
5	Prevalence	44634	High-middle SDI	3	Both	18	65-69 years	1048	COVID-19	1	Number	2021	1.08935e+06	1.54098e+06	832239
5	Prevalence	44634	High-middle SDI	3	Both	19	70-74 years	1048	COVID-19	1	Number	2021	760276	1.05365e+06	578986
5	Prevalence	44634	High-middle SDI	3	Both	20	75-79 years	1048	COVID-19	1	Number	2021	438693	602913	333974
5	Prevalence	44634	High-middle SDI	3	Both	30	80-84 years	1048	COVID-19	1	Number	2021	393165	535006	300804
5	Prevalence	44634	High-middle SDI	3	Both	31	85-89 years	1048	COVID-19	1	Number	2021	182585	243752	140611
5	Prevalence	44634	High-middle SDI	3	Both	32	90-94 years	1048	COVID-19	1	Number	2021	77710	102885	59898.2
5	Prevalence	44634	High-middle SDI	3	Both	235	95+ years	1048	COVID-19	1	Number	2021	18923.4	24926.9	14400.5
5	Prevalence	44635	High SDI	1	Male	1	<5 years	1048	COVID-19	1	Number	2021	127252	164191	107384
5	Prevalence	44635	High SDI	1	Male	6	5-9 years	1048	COVID-19	1	Number	2021	219392	283602	184693
5	Prevalence	44635	High SDI	1	Male	7	10-14 years	1048	COVID-19	1	Number	2021	267370	345098	225290
5	Prevalence	44635	High SDI	1	Male	8	15-19 years	1048	COVID-19	1	Number	2021	294971	380652	248955
5	Prevalence	44635	High SDI	1	Male	9	20-24 years	1048	COVID-19	1	Number	2021	346687	481152	270214
5	Prevalence	44635	High SDI	1	Male	10	25-29 years	1048	COVID-19	1	Number	2021	349507	484114	273350
5	Prevalence	44635	High SDI	1	Male	11	30-34 years	1048	COVID-19	1	Number	2021	361999	496385	285082
5	Prevalence	44635	High SDI	1	Male	12	35-39 years	1048	COVID-19	1	Number	2021	375043	512831	295328
5	Prevalence	44635	High SDI	1	Male	13	40-44 years	1048	COVID-19	1	Number	2021	356601	486583	281874
5	Prevalence	44635	High SDI	1	Male	14	45-49 years	1048	COVID-19	1	Number	2021	353636	481184	280604
5	Prevalence	44635	High SDI	1	Male	15	50-54 years	1048	COVID-19	1	Number	2021	345670	468347	275286
5	Prevalence	44635	High SDI	1	Male	16	55-59 years	1048	COVID-19	1	Number	2021	337314	454723	269838
5	Prevalence	44635	High SDI	1	Male	17	60-64 years	1048	COVID-19	1	Number	2021	303449	405310	244211
5	Prevalence	44635	High SDI	1	Male	18	65-69 years	1048	COVID-19	1	Number	2021	253545	333496	204763
5	Prevalence	44635	High SDI	1	Male	19	70-74 years	1048	COVID-19	1	Number	2021	206014	269031	166126
5	Prevalence	44635	High SDI	1	Male	20	75-79 years	1048	COVID-19	1	Number	2021	136628	175855	109904
5	Prevalence	44635	High SDI	1	Male	30	80-84 years	1048	COVID-19	1	Number	2021	93249.2	118927	75126.6
5	Prevalence	44635	High SDI	1	Male	31	85-89 years	1048	COVID-19	1	Number	2021	51456	65658.1	41293.9
5	Prevalence	44635	High SDI	1	Male	32	90-94 years	1048	COVID-19	1	Number	2021	20829	27015.3	16579.8
5	Prevalence	44635	High SDI	1	Male	235	95+ years	1048	COVID-19	1	Number	2021	5998.17	7840.18	4751.88
5	Prevalence	44635	High SDI	2	Female	1	<5 years	1048	COVID-19	1	Number	2021	122035	157353	102851
5	Prevalence	44635	High SDI	2	Female	6	5-9 years	1048	COVID-19	1	Number	2021	209720	270833	176572
5	Prevalence	44635	High SDI	2	Female	7	10-14 years	1048	COVID-19	1	Number	2021	255591	329739	215417
5	Prevalence	44635	High SDI	2	Female	8	15-19 years	1048	COVID-19	1	Number	2021	280734	362026	236849
5	Prevalence	44635	High SDI	2	Female	9	20-24 years	1048	COVID-19	1	Number	2021	435270	671766	302299
5	Prevalence	44635	High SDI	2	Female	10	25-29 years	1048	COVID-19	1	Number	2021	442429	681118	310097
5	Prevalence	44635	High SDI	2	Female	11	30-34 years	1048	COVID-19	1	Number	2021	445368	679691	314995
5	Prevalence	44635	High SDI	2	Female	12	35-39 years	1048	COVID-19	1	Number	2021	448101	676862	317654
5	Prevalence	44635	High SDI	2	Female	13	40-44 years	1048	COVID-19	1	Number	2021	433732	651551	309181
5	Prevalence	44635	High SDI	2	Female	14	45-49 years	1048	COVID-19	1	Number	2021	435298	652744	311465
5	Prevalence	44635	High SDI	2	Female	15	50-54 years	1048	COVID-19	1	Number	2021	434453	651253	311035
5	Prevalence	44635	High SDI	2	Female	16	55-59 years	1048	COVID-19	1	Number	2021	437611	652327	315040
5	Prevalence	44635	High SDI	2	Female	17	60-64 years	1048	COVID-19	1	Number	2021	406589	595728	295954
5	Prevalence	44635	High SDI	2	Female	18	65-69 years	1048	COVID-19	1	Number	2021	352515	507244	260221
5	Prevalence	44635	High SDI	2	Female	19	70-74 years	1048	COVID-19	1	Number	2021	295140	415307	221037
5	Prevalence	44635	High SDI	2	Female	20	75-79 years	1048	COVID-19	1	Number	2021	207735	285819	157103
5	Prevalence	44635	High SDI	2	Female	30	80-84 years	1048	COVID-19	1	Number	2021	158850	212957	121856
5	Prevalence	44635	High SDI	2	Female	31	85-89 years	1048	COVID-19	1	Number	2021	103886	136719	80066.7
5	Prevalence	44635	High SDI	2	Female	32	90-94 years	1048	COVID-19	1	Number	2021	53119.8	69571.5	41195.5
5	Prevalence	44635	High SDI	2	Female	235	95+ years	1048	COVID-19	1	Number	2021	19949.1	25915.7	15724.5
5	Prevalence	44635	High SDI	3	Both	1	<5 years	1048	COVID-19	1	Number	2021	249287	321545	210238
5	Prevalence	44635	High SDI	3	Both	6	5-9 years	1048	COVID-19	1	Number	2021	429112	554435	361296
5	Prevalence	44635	High SDI	3	Both	7	10-14 years	1048	COVID-19	1	Number	2021	522961	674837	440678
5	Prevalence	44635	High SDI	3	Both	8	15-19 years	1048	COVID-19	1	Number	2021	575704	742678	485821
5	Prevalence	44635	High SDI	3	Both	9	20-24 years	1048	COVID-19	1	Number	2021	781956	1.13989e+06	572962
5	Prevalence	44635	High SDI	3	Both	10	25-29 years	1048	COVID-19	1	Number	2021	791936	1.15348e+06	584594
5	Prevalence	44635	High SDI	3	Both	11	30-34 years	1048	COVID-19	1	Number	2021	807368	1.17452e+06	602355
5	Prevalence	44635	High SDI	3	Both	12	35-39 years	1048	COVID-19	1	Number	2021	823144	1.19208e+06	613901
5	Prevalence	44635	High SDI	3	Both	13	40-44 years	1048	COVID-19	1	Number	2021	790333	1.14235e+06	591965
5	Prevalence	44635	High SDI	3	Both	14	45-49 years	1048	COVID-19	1	Number	2021	788934	1.13417e+06	593460
5	Prevalence	44635	High SDI	3	Both	15	50-54 years	1048	COVID-19	1	Number	2021	780123	1.11537e+06	586956
5	Prevalence	44635	High SDI	3	Both	16	55-59 years	1048	COVID-19	1	Number	2021	774925	1.10295e+06	587128
5	Prevalence	44635	High SDI	3	Both	17	60-64 years	1048	COVID-19	1	Number	2021	710037	999392	542293
5	Prevalence	44635	High SDI	3	Both	18	65-69 years	1048	COVID-19	1	Number	2021	606060	838904	464752
5	Prevalence	44635	High SDI	3	Both	19	70-74 years	1048	COVID-19	1	Number	2021	501154	678545	387391
5	Prevalence	44635	High SDI	3	Both	20	75-79 years	1048	COVID-19	1	Number	2021	344363	458641	269342
5	Prevalence	44635	High SDI	3	Both	30	80-84 years	1048	COVID-19	1	Number	2021	252100	330672	197958
5	Prevalence	44635	High SDI	3	Both	31	85-89 years	1048	COVID-19	1	Number	2021	155342	200783	122014
5	Prevalence	44635	High SDI	3	Both	32	90-94 years	1048	COVID-19	1	Number	2021	73948.8	95414.9	58218.3
5	Prevalence	44635	High SDI	3	Both	235	95+ years	1048	COVID-19	1	Number	2021	25947.3	33275.5	20656.5
5	Prevalence	44636	Low-middle SDI	1	Male	1	<5 years	1048	COVID-19	1	Number	2021	1.15437e+06	1.4976e+06	938034
5	Prevalence	44636	Low-middle SDI	1	Male	6	5-9 years	1048	COVID-19	1	Number	2021	2.22848e+06	2.91142e+06	1.80963e+06
5	Prevalence	44636	Low-middle SDI	1	Male	7	10-14 years	1048	COVID-19	1	Number	2021	2.29405e+06	3.0152e+06	1.85042e+06
5	Prevalence	44636	Low-middle SDI	1	Male	8	15-19 years	1048	COVID-19	1	Number	2021	2.24375e+06	2.94445e+06	1.8021e+06
5	Prevalence	44636	Low-middle SDI	1	Male	9	20-24 years	1048	COVID-19	1	Number	2021	2.45869e+06	3.4724e+06	1.85506e+06
5	Prevalence	44636	Low-middle SDI	1	Male	10	25-29 years	1048	COVID-19	1	Number	2021	2.22805e+06	3.14117e+06	1.68784e+06
5	Prevalence	44636	Low-middle SDI	1	Male	11	30-34 years	1048	COVID-19	1	Number	2021	2.02679e+06	2.83357e+06	1.53913e+06
5	Prevalence	44636	Low-middle SDI	1	Male	12	35-39 years	1048	COVID-19	1	Number	2021	1.81144e+06	2.52865e+06	1.37457e+06
5	Prevalence	44636	Low-middle SDI	1	Male	13	40-44 years	1048	COVID-19	1	Number	2021	1.55554e+06	2.16333e+06	1.18603e+06
5	Prevalence	44636	Low-middle SDI	1	Male	14	45-49 years	1048	COVID-19	1	Number	2021	1.33832e+06	1.85701e+06	1.02037e+06
5	Prevalence	44636	Low-middle SDI	1	Male	15	50-54 years	1048	COVID-19	1	Number	2021	1.14157e+06	1.59209e+06	873103
5	Prevalence	44636	Low-middle SDI	1	Male	16	55-59 years	1048	COVID-19	1	Number	2021	956887	1.33098e+06	736407
5	Prevalence	44636	Low-middle SDI	1	Male	17	60-64 years	1048	COVID-19	1	Number	2021	771953	1.06255e+06	596933
5	Prevalence	44636	Low-middle SDI	1	Male	18	65-69 years	1048	COVID-19	1	Number	2021	569358	778327	439323
5	Prevalence	44636	Low-middle SDI	1	Male	19	70-74 years	1048	COVID-19	1	Number	2021	372207	500337	287071
5	Prevalence	44636	Low-middle SDI	1	Male	20	75-79 years	1048	COVID-19	1	Number	2021	232561	311032	178740
5	Prevalence	44636	Low-middle SDI	1	Male	30	80-84 years	1048	COVID-19	1	Number	2021	127108	171480	96255.5
5	Prevalence	44636	Low-middle SDI	1	Male	31	85-89 years	1048	COVID-19	1	Number	2021	55523.2	76244.2	41127.7
5	Prevalence	44636	Low-middle SDI	1	Male	32	90-94 years	1048	COVID-19	1	Number	2021	18129	25641.6	13220.4
[truncated: 5,201 more rows]
