# Supplementary material for: Trends and cross-country disparity in the burden of COVID-19 between 2020 and 2021: a systematic analysis for the Global Burden of Disease Study 2021
Source: Research Square preprint supplement (doi:10.21203/rs.3.rs-5109929/v1), 2024-09-24
Supplement: Supplementary file 2 [file a1eaeb2a968601694c3f384c.xlsx]

## Sheet: The number
measure_id	measure_name	location_id	location_name	sex_id	sex_name	age_id	age_name	cause_id	cause_name	metric_id	metric_name	year	val	upper	lower
1	Deaths	27	Samoa	1	Male	22	All ages	1048	COVID-19	1	Number	2020	2.5e-09	2.5e-09	2.5e-09
1	Deaths	27	Samoa	2	Female	22	All ages	1048	COVID-19	1	Number	2020	2.5e-09	2.5e-09	2.5e-09
1	Deaths	27	Samoa	3	Both	22	All ages	1048	COVID-19	1	Number	2020	5e-09	5e-09	5e-09
1	Deaths	26	Papua New Guinea	1	Male	22	All ages	1048	COVID-19	1	Number	2020	595.53	1323.23	105.939
1	Deaths	26	Papua New Guinea	2	Female	22	All ages	1048	COVID-19	1	Number	2020	283.641	631.088	50.7011
1	Deaths	26	Papua New Guinea	3	Both	22	All ages	1048	COVID-19	1	Number	2020	879.171	1954.23	156.405
1	Deaths	11	Indonesia	1	Male	22	All ages	1048	COVID-19	1	Number	2020	58601.5	120273	19072.9
1	Deaths	11	Indonesia	2	Female	22	All ages	1048	COVID-19	1	Number	2020	31529.2	64733.4	10231.6
1	Deaths	11	Indonesia	3	Both	22	All ages	1048	COVID-19	1	Number	2020	90130.8	185006	29304.9
1	Deaths	59	Latvia	1	Male	22	All ages	1048	COVID-19	1	Number	2020	491.243	1010.01	255.032
1	Deaths	59	Latvia	2	Female	22	All ages	1048	COVID-19	1	Number	2020	489.082	1013.02	251.762
1	Deaths	59	Latvia	3	Both	22	All ages	1048	COVID-19	1	Number	2020	980.325	2020.95	507.431
1	Deaths	109	Cuba	1	Male	22	All ages	1048	COVID-19	1	Number	2020	533.81	2371.58	66.2537
1	Deaths	109	Cuba	2	Female	22	All ages	1048	COVID-19	1	Number	2020	387.053	1747.09	48.968
1	Deaths	109	Cuba	3	Both	22	All ages	1048	COVID-19	1	Number	2020	920.862	4128.53	121.159
1	Deaths	28	Solomon Islands	1	Male	22	All ages	1048	COVID-19	1	Number	2020	2.5e-09	2.5e-09	2.5e-09
1	Deaths	28	Solomon Islands	2	Female	22	All ages	1048	COVID-19	1	Number	2020	2.5e-09	2.5e-09	2.5e-09
1	Deaths	28	Solomon Islands	3	Both	22	All ages	1048	COVID-19	1	Number	2020	5e-09	5e-09	5e-09
1	Deaths	93	Sweden	1	Male	22	All ages	1048	COVID-19	1	Number	2020	5298.69	5837.41	4758.27
1	Deaths	93	Sweden	2	Female	22	All ages	1048	COVID-19	1	Number	2020	4515.64	4990.73	4082.35
1	Deaths	93	Sweden	3	Both	22	All ages	1048	COVID-19	1	Number	2020	9814.33	10569.1	9033.75
1	Deaths	142	Iran (Islamic Republic of)	1	Male	22	All ages	1048	COVID-19	1	Number	2020	33222.1	41354.7	25332.6
1	Deaths	142	Iran (Islamic Republic of)	2	Female	22	All ages	1048	COVID-19	1	Number	2020	21995.3	27329.5	16963.1
1	Deaths	142	Iran (Islamic Republic of)	3	Both	22	All ages	1048	COVID-19	1	Number	2020	55217.4	65321.8	45687
1	Deaths	76	Belgium	1	Male	22	All ages	1048	COVID-19	1	Number	2020	10545	10947.5	10136
1	Deaths	76	Belgium	2	Female	22	All ages	1048	COVID-19	1	Number	2020	9160	9496.2	8837.65
1	Deaths	76	Belgium	3	Both	22	All ages	1048	COVID-19	1	Number	2020	19705	20349.6	19078.2
1	Deaths	380	Palau	1	Male	22	All ages	1048	COVID-19	1	Number	2020	2.5e-09	2.5e-09	2.5e-09
1	Deaths	380	Palau	2	Female	22	All ages	1048	COVID-19	1	Number	2020	2.5e-09	2.5e-09	2.5e-09
1	Deaths	380	Palau	3	Both	22	All ages	1048	COVID-19	1	Number	2020	5e-09	5e-09	5e-09
1	Deaths	385	Puerto Rico	1	Male	22	All ages	1048	COVID-19	1	Number	2020	955.199	1461.63	578.444
1	Deaths	385	Puerto Rico	2	Female	22	All ages	1048	COVID-19	1	Number	2020	685.152	1046.62	428.343
1	Deaths	385	Puerto Rico	3	Both	22	All ages	1048	COVID-19	1	Number	2020	1640.35	2513.97	1009.03
1	Deaths	92	Spain	1	Male	22	All ages	1048	COVID-19	1	Number	2020	32663.8	34365.5	30921.7
1	Deaths	92	Spain	2	Female	22	All ages	1048	COVID-19	1	Number	2020	28201.2	29468.1	26777.8
1	Deaths	92	Spain	3	Both	22	All ages	1048	COVID-19	1	Number	2020	60865	63695.4	57864.9
1	Deaths	191	Zambia	1	Male	22	All ages	1048	COVID-19	1	Number	2020	7639.58	8650.51	6691.76
1	Deaths	191	Zambia	2	Female	22	All ages	1048	COVID-19	1	Number	2020	4168.85	4712.68	3659.57
1	Deaths	191	Zambia	3	Both	22	All ages	1048	COVID-19	1	Number	2020	11808.4	13363.2	10351.7
1	Deaths	126	Costa Rica	1	Male	22	All ages	1048	COVID-19	1	Number	2020	1475.53	2043.68	1006.12
1	Deaths	126	Costa Rica	2	Female	22	All ages	1048	COVID-19	1	Number	2020	815.256	1124.59	521.323
1	Deaths	126	Costa Rica	3	Both	22	All ages	1048	COVID-19	1	Number	2020	2290.79	3156.55	1570.29
1	Deaths	110	Dominica	1	Male	22	All ages	1048	COVID-19	1	Number	2020	2.5e-09	2.5e-09	2.5e-09
1	Deaths	110	Dominica	2	Female	22	All ages	1048	COVID-19	1	Number	2020	2.5e-09	2.5e-09	2.5e-09
1	Deaths	110	Dominica	3	Both	22	All ages	1048	COVID-19	1	Number	2020	5e-09	5e-09	5e-09
1	Deaths	60	Lithuania	1	Male	22	All ages	1048	COVID-19	1	Number	2020	2164.54	3108.12	1268.02
1	Deaths	60	Lithuania	2	Female	22	All ages	1048	COVID-19	1	Number	2020	2063.67	2942.51	1225.76
1	Deaths	60	Lithuania	3	Both	22	All ages	1048	COVID-19	1	Number	2020	4228.21	6007.2	2517.97
1	Deaths	7	Democratic People's Republic of Korea	1	Male	22	All ages	1048	COVID-19	1	Number	2020	275.781	1304.21	50.7102
1	Deaths	7	Democratic People's Republic of Korea	2	Female	22	All ages	1048	COVID-19	1	Number	2020	285.844	1351.93	52.5575
1	Deaths	7	Democratic People's Republic of Korea	3	Both	22	All ages	1048	COVID-19	1	Number	2020	561.625	2656.14	103.265
1	Deaths	44	Bosnia and Herzegovina	1	Male	22	All ages	1048	COVID-19	1	Number	2020	2711.59	3789.73	1771.35
1	Deaths	44	Bosnia and Herzegovina	2	Female	22	All ages	1048	COVID-19	1	Number	2020	1875.79	2612.85	1225.26
1	Deaths	44	Bosnia and Herzegovina	3	Both	22	All ages	1048	COVID-19	1	Number	2020	4587.37	6280.39	2994.94
1	Deaths	8	Taiwan (Province of China)	1	Male	22	All ages	1048	COVID-19	1	Number	2020	4.22963	6.42667	2.35013
1	Deaths	8	Taiwan (Province of China)	2	Female	22	All ages	1048	COVID-19	1	Number	2020	2.76842	4.13808	1.4909
1	Deaths	8	Taiwan (Province of China)	3	Both	22	All ages	1048	COVID-19	1	Number	2020	6.99806	10.1733	4.11189
1	Deaths	36	Kazakhstan	1	Male	22	All ages	1048	COVID-19	1	Number	2020	12869.3	16823.3	8935.48
1	Deaths	36	Kazakhstan	2	Female	22	All ages	1048	COVID-19	1	Number	2020	10654.6	13679.3	7546.74
1	Deaths	36	Kazakhstan	3	Both	22	All ages	1048	COVID-19	1	Number	2020	23523.9	30406.3	16707.1
1	Deaths	80	France	1	Male	22	All ages	1048	COVID-19	1	Number	2020	30625.3	32459.2	28789.4
1	Deaths	80	France	2	Female	22	All ages	1048	COVID-19	1	Number	2020	25282.7	26821.7	23807.8
1	Deaths	80	France	3	Both	22	All ages	1048	COVID-19	1	Number	2020	55908	59146.8	52687.1
1	Deaths	97	Argentina	1	Male	22	All ages	1048	COVID-19	1	Number	2020	24581.9	25552.9	23676
1	Deaths	97	Argentina	2	Female	22	All ages	1048	COVID-19	1	Number	2020	18797.3	19500.5	18111.7
1	Deaths	97	Argentina	3	Both	22	All ages	1048	COVID-19	1	Number	2020	43379.2	44952	41880.1
1	Deaths	16	Philippines	1	Male	22	All ages	1048	COVID-19	1	Number	2020	7660.16	12180.1	3528.17
1	Deaths	16	Philippines	2	Female	22	All ages	1048	COVID-19	1	Number	2020	5286.59	8373.55	2711.59
1	Deaths	16	Philippines	3	Both	22	All ages	1048	COVID-19	1	Number	2020	12946.7	18463.5	8053.71
1	Deaths	196	South Africa	1	Male	22	All ages	1048	COVID-19	1	Number	2020	61520.7	61550.6	61465.6
1	Deaths	196	South Africa	2	Female	22	All ages	1048	COVID-19	1	Number	2020	46864.7	46907.2	46805.3
1	Deaths	196	South Africa	3	Both	22	All ages	1048	COVID-19	1	Number	2020	108385	108457	108273
1	Deaths	68	Republic of Korea	1	Male	22	All ages	1048	COVID-19	1	Number	2020	738.044	1160.07	480.067
1	Deaths	68	Republic of Korea	2	Female	22	All ages	1048	COVID-19	1	Number	2020	526.814	842.572	341.346
1	Deaths	68	Republic of Korea	3	Both	22	All ages	1048	COVID-19	1	Number	2020	1264.86	1999.11	825.569
1	Deaths	69	Singapore	1	Male	22	All ages	1048	COVID-19	1	Number	2020	18.7249	19.8059	17.5909
1	Deaths	69	Singapore	2	Female	22	All ages	1048	COVID-19	1	Number	2020	10.2748	11.0955	9.43499
1	Deaths	69	Singapore	3	Both	22	All ages	1048	COVID-19	1	Number	2020	28.9997	30.6971	27.3381
1	Deaths	6	China	1	Male	22	All ages	1048	COVID-19	1	Number	2020	16898.6	86343	3713.42
1	Deaths	6	China	2	Female	22	All ages	1048	COVID-19	1	Number	2020	10055.7	50899.2	2159.81
1	Deaths	6	China	3	Both	22	All ages	1048	COVID-19	1	Number	2020	26954.3	137242	5873.23
1	Deaths	416	Tuvalu	1	Male	22	All ages	1048	COVID-19	1	Number	2020	2.5e-09	2.5e-09	2.5e-09
1	Deaths	416	Tuvalu	2	Female	22	All ages	1048	COVID-19	1	Number	2020	2.5e-09	2.5e-09	2.5e-09
1	Deaths	416	Tuvalu	3	Both	22	All ages	1048	COVID-19	1	Number	2020	5e-09	5e-09	5e-09
1	Deaths	114	Haiti	1	Male	22	All ages	1048	COVID-19	1	Number	2020	6709.95	11392.9	2855.63
1	Deaths	114	Haiti	2	Female	22	All ages	1048	COVID-19	1	Number	2020	3551.99	6026.14	1512.3
1	Deaths	114	Haiti	3	Both	22	All ages	1048	COVID-19	1	Number	2020	10261.9	17417.3	4367.65
1	Deaths	147	Libya	1	Male	22	All ages	1048	COVID-19	1	Number	2020	3266.59	3772.78	2602.59
1	Deaths	147	Libya	2	Female	22	All ages	1048	COVID-19	1	Number	2020	1610.79	1860.48	1282.54
1	Deaths	147	Libya	3	Both	22	All ages	1048	COVID-19	1	Number	2020	4877.38	5633.3	3885.13
1	Deaths	101	Canada	1	Male	22	All ages	1048	COVID-19	1	Number	2020	15905.9	16873.6	14939.2
1	Deaths	101	Canada	2	Female	22	All ages	1048	COVID-19	1	Number	2020	13839.8	14606	12988
1	Deaths	101	Canada	3	Both	22	All ages	1048	COVID-19	1	Number	2020	29745.8	31371.9	28019.4
1	Deaths	40	Turkmenistan	1	Male	22	All ages	1048	COVID-19	1	Number	2020	2960.56	3557.8	2239.85
1	Deaths	40	Turkmenistan	2	Female	22	All ages	1048	COVID-19	1	Number	2020	2161.7	2598.01	1635.42
1	Deaths	40	Turkmenistan	3	Both	22	All ages	1048	COVID-19	1	Number	2020	5122.26	6155.81	3875.22
1	Deaths	201	Burkina Faso	1	Male	22	All ages	1048	COVID-19	1	Number	2020	7847.98	8518.39	7040.68
1	Deaths	201	Burkina Faso	2	Female	22	All ages	1048	COVID-19	1	Number	2020	4535.43	4930.28	4067.97
1	Deaths	201	Burkina Faso	3	Both	22	All ages	1048	COVID-19	1	Number	2020	12383.4	13448.6	11108.7
1	Deaths	413	Tokelau	1	Male	22	All ages	1048	COVID-19	1	Number	2020	2.5e-09	2.5e-09	2.5e-09
1	Deaths	413	Tokelau	2	Female	22	All ages	1048	COVID-19	1	Number	2020	2.5e-09	2.5e-09	2.5e-09
1	Deaths	413	Tokelau	3	Both	22	All ages	1048	COVID-19	1	Number	2020	5e-09	5e-09	5e-09
1	Deaths	13	Malaysia	1	Male	22	All ages	1048	COVID-19	1	Number	2020	312.132	472.067	167.864
1	Deaths	13	Malaysia	2	Female	22	All ages	1048	COVID-19	1	Number	2020	166.052	247.058	89.9873
1	Deaths	13	Malaysia	3	Both	22	All ages	1048	COVID-19	1	Number	2020	478.183	721.253	254.251
1	Deaths	98	Chile	1	Male	22	All ages	1048	COVID-19	1	Number	2020	12645.1	13271.8	11995.6
1	Deaths	98	Chile	2	Female	22	All ages	1048	COVID-19	1	Number	2020	8433.98	8856.63	8011.11
1	Deaths	98	Chile	3	Both	22	All ages	1048	COVID-19	1	Number	2020	21079.1	22031.4	20155.3
1	Deaths	61	Republic of Moldova	1	Male	22	All ages	1048	COVID-19	1	Number	2020	2184.57	2815.94	1551.92
1	Deaths	61	Republic of Moldova	2	Female	22	All ages	1048	COVID-19	1	Number	2020	1849.14	2388.61	1278.95
1	Deaths	61	Republic of Moldova	3	Both	22	All ages	1048	COVID-19	1	Number	2020	4033.71	5153.14	2823.25
1	Deaths	48	Hungary	1	Male	22	All ages	1048	COVID-19	1	Number	2020	5449.55	7454.79	3837.3
1	Deaths	48	Hungary	2	Female	22	All ages	1048	COVID-19	1	Number	2020	4929.88	6691.4	3530.74
1	Deaths	48	Hungary	3	Both	22	All ages	1048	COVID-19	1	Number	2020	10379.4	14146.2	7381.79
1	Deaths	422	United States Virgin Islands	1	Male	22	All ages	1048	COVID-19	1	Number	2020	31.2811	49.9696	14.7411
1	Deaths	422	United States Virgin Islands	2	Female	22	All ages	1048	COVID-19	1	Number	2020	11.19	17.9431	5.31941
1	Deaths	422	United States Virgin Islands	3	Both	22	All ages	1048	COVID-19	1	Number	2020	42.4712	68.2067	20.1234
1	Deaths	205	C么te d'Ivoire	1	Male	22	All ages	1048	COVID-19	1	Number	2020	10436.5	11329.6	9429.49
1	Deaths	205	C么te d'Ivoire	2	Female	22	All ages	1048	COVID-19	1	Number	2020	4879.19	5307.51	4404.08
1	Deaths	205	C么te d'Ivoire	3	Both	22	All ages	1048	COVID-19	1	Number	2020	15315.7	16637.1	13830.5
1	Deaths	106	Bahamas	1	Male	22	All ages	1048	COVID-19	1	Number	2020	252.931	370.106	116.281
1	Deaths	106	Bahamas	2	Female	22	All ages	1048	COVID-19	1	Number	2020	164.702	241.007	75.7082
1	Deaths	106	Bahamas	3	Both	22	All ages	1048	COVID-19	1	Number	2020	417.633	611.113	192.002
1	Deaths	49	North Macedonia	1	Male	22	All ages	1048	COVID-19	1	Number	2020	2939.25	3775.31	2078.7
1	Deaths	49	North Macedonia	2	Female	22	All ages	1048	COVID-19	1	Number	2020	1905.02	2443.86	1341.76
1	Deaths	49	North Macedonia	3	Both	22	All ages	1048	COVID-19	1	Number	2020	4844.27	6204.55	3409.8
1	Deaths	206	Gambia	1	Male	22	All ages	1048	COVID-19	1	Number	2020	1282.36	1514.77	1116.25
1	Deaths	206	Gambia	2	Female	22	All ages	1048	COVID-19	1	Number	2020	731.477	863.878	636.804
1	Deaths	206	Gambia	3	Both	22	All ages	1048	COVID-19	1	Number	2020	2013.84	2378.74	1753.06
1	Deaths	62	Russian Federation	1	Male	22	All ages	1048	COVID-19	1	Number	2020	82319.5	99197.8	66018.1
1	Deaths	62	Russian Federation	2	Female	22	All ages	1048	COVID-19	1	Number	2020	81047.8	97491.5	65788.4
1	Deaths	62	Russian Federation	3	Both	22	All ages	1048	COVID-19	1	Number	2020	163367	186182	141778
1	Deaths	131	Nicaragua	1	Male	22	All ages	1048	COVID-19	1	Number	2020	5662.56	6666.32	4631.59
1	Deaths	131	Nicaragua	2	Female	22	All ages	1048	COVID-19	1	Number	2020	3214	3942.44	2533.12
1	Deaths	131	Nicaragua	3	Both	22	All ages	1048	COVID-19	1	Number	2020	8876.57	10364.6	7270.69
1	Deaths	20	Viet Nam	1	Male	22	All ages	1048	COVID-19	1	Number	2020	316.795	606.429	75.2486
1	Deaths	20	Viet Nam	2	Female	22	All ages	1048	COVID-19	1	Number	2020	278.038	532.239	66.0428
1	Deaths	20	Viet Nam	3	Both	22	All ages	1048	COVID-19	1	Number	2020	594.833	1138.67	141.291
1	Deaths	119	Trinidad and Tobago	1	Male	22	All ages	1048	COVID-19	1	Number	2020	420.513	727.579	178.958
1	Deaths	119	Trinidad and Tobago	2	Female	22	All ages	1048	COVID-19	1	Number	2020	261.142	451.813	111.149
1	Deaths	119	Trinidad and Tobago	3	Both	22	All ages	1048	COVID-19	1	Number	2020	681.655	1179.39	290.089
1	Deaths	85	Israel	1	Male	22	All ages	1048	COVID-19	1	Number	2020	2030.19	2156.41	1908.41
1	Deaths	85	Israel	2	Female	22	All ages	1048	COVID-19	1	Number	2020	1294.78	1377.03	1212.9
1	Deaths	85	Israel	3	Both	22	All ages	1048	COVID-19	1	Number	2020	3324.97	3496.59	3165.92
1	Deaths	152	Saudi Arabia	1	Male	22	All ages	1048	COVID-19	1	Number	2020	9420.18	11165.8	7408.65
1	Deaths	152	Saudi Arabia	2	Female	22	All ages	1048	COVID-19	1	Number	2020	3015.78	3574.52	2369.86
1	Deaths	152	Saudi Arabia	3	Both	22	All ages	1048	COVID-19	1	Number	2020	12436	14740.2	9777.97
1	Deaths	37	Kyrgyzstan	1	Male	22	All ages	1048	COVID-19	1	Number	2020	3330.01	4120.6	2377.97
1	Deaths	37	Kyrgyzstan	2	Female	22	All ages	1048	COVID-19	1	Number	2020	2450.05	3031.85	1748.65
1	Deaths	37	Kyrgyzstan	3	Both	22	All ages	1048	COVID-19	1	Number	2020	5780.06	7152.45	4126.29
1	Deaths	66	Brunei Darussalam	1	Male	22	All ages	1048	COVID-19	1	Number	2020	10.4141	44.6497	1.08148
1	Deaths	66	Brunei Darussalam	2	Female	22	All ages	1048	COVID-19	1	Number	2020	4.41115	16.4767	0.732789
1	Deaths	66	Brunei Darussalam	3	Both	22	All ages	1048	COVID-19	1	Number	2020	14.8252	60.7961	1.87337
1	Deaths	53	Serbia	1	Male	22	All ages	1048	COVID-19	1	Number	2020	6859	11671.2	2222.08
1	Deaths	53	Serbia	2	Female	22	All ages	1048	COVID-19	1	Number	2020	4580.22	7975.31	1488.23
1	Deaths	53	Serbia	3	Both	22	All ages	1048	COVID-19	1	Number	2020	11439.2	19484.1	3611.55
1	Deaths	25	Micronesia (Federated States of)	1	Male	22	All ages	1048	COVID-19	1	Number	2020	2.5e-09	2.5e-09	2.5e-09
1	Deaths	25	Micronesia (Federated States of)	2	Female	22	All ages	1048	COVID-19	1	Number	2020	2.5e-09	2.5e-09	2.5e-09
1	Deaths	25	Micronesia (Federated States of)	3	Both	22	All ages	1048	COVID-19	1	Number	2020	5e-09	5e-09	5e-09
1	Deaths	160	Afghanistan	1	Male	22	All ages	1048	COVID-19	1	Number	2020	22244.6	29700.7	16807.1
1	Deaths	160	Afghanistan	2	Female	22	All ages	1048	COVID-19	1	Number	2020	11903.7	15858	8994.65
1	Deaths	160	Afghanistan	3	Both	22	All ages	1048	COVID-19	1	Number	2020	34148.3	45559.3	25800.8
1	Deaths	102	United States of America	1	Male	22	All ages	1048	COVID-19	1	Number	2020	238725	247711	230348
1	Deaths	102	United States of America	2	Female	22	All ages	1048	COVID-19	1	Number	2020	187722	194557	181179
1	Deaths	102	United States of America	3	Both	22	All ages	1048	COVID-19	1	Number	2020	426447	442456	411298
1	Deaths	435	South Sudan	1	Male	22	All ages	1048	COVID-19	1	Number	2020	5482.39	6127.82	4687.35
1	Deaths	435	South Sudan	2	Female	22	All ages	1048	COVID-19	1	Number	2020	2513.93	2809.9	2149.62
1	Deaths	435	South Sudan	3	Both	22	All ages	1048	COVID-19	1	Number	2020	7996.32	8938.07	6837.47
1	Deaths	12	Lao People's Democratic Republic	1	Male	22	All ages	1048	COVID-19	1	Number	2020	2.5e-09	2.5e-09	2.5e-09
1	Deaths	12	Lao People's Democratic Republic	2	Female	22	All ages	1048	COVID-19	1	Number	2020	2.5e-09	2.5e-09	2.5e-09
1	Deaths	12	Lao People's Democratic Republic	3	Both	22	All ages	1048	COVID-19	1	Number	2020	5e-09	5e-09	5e-09
1	Deaths	18	Thailand	1	Male	22	All ages	1048	COVID-19	1	Number	2020	417.128	851.35	96.1049
1	Deaths	18	Thailand	2	Female	22	All ages	1048	COVID-19	1	Number	2020	320.848	654.845	73.9223
1	Deaths	18	Thailand	3	Both	22	All ages	1048	COVID-19	1	Number	2020	737.977	1506.19	170.027
1	Deaths	135	Brazil	1	Male	22	All ages	1048	COVID-19	1	Number	2020	120896	133888	108920
1	Deaths	135	Brazil	2	Female	22	All ages	1048	COVID-19	1	Number	2020	78661.1	86459.6	71183.2
1	Deaths	135	Brazil	3	Both	22	All ages	1048	COVID-19	1	Number	2020	199557	217271	184604
1	Deaths	30	Vanuatu	1	Male	22	All ages	1048	COVID-19	1	Number	2020	2.5e-09	2.5e-09	2.5e-09
1	Deaths	30	Vanuatu	2	Female	22	All ages	1048	COVID-19	1	Number	2020	2.5e-09	2.5e-09	2.5e-09
1	Deaths	30	Vanuatu	3	Both	22	All ages	1048	COVID-19	1	Number	2020	5e-09	5e-09	5e-09
1	Deaths	90	Norway	1	Male	22	All ages	1048	COVID-19	1	Number	2020	242.109	265.69	218.642
1	Deaths	90	Norway	2	Female	22	All ages	1048	COVID-19	1	Number	2020	193.843	213.304	175.498
1	Deaths	90	Norway	3	Both	22	All ages	1048	COVID-19	1	Number	2020	435.952	468.13	407.142
1	Deaths	71	Australia	1	Male	22	All ages	1048	COVID-19	1	Number	2020	550.59	576.49	523.123
1	Deaths	71	Australia	2	Female	22	All ages	1048	COVID-19	1	Number	2020	400.408	419.523	379.329
1	Deaths	71	Australia	3	Both	22	All ages	1048	COVID-19	1	Number	2020	950.998	991.521	904.786
1	Deaths	156	United Arab Emirates	1	Male	22	All ages	1048	COVID-19	1	Number	2020	559.582	1446.68	146.772
1	Deaths	156	United Arab Emirates	2	Female	22	All ages	1048	COVID-19	1	Number	2020	108.13	211.534	40.5989
1	Deaths	156	United Arab Emirates	3	Both	22	All ages	1048	COVID-19	1	Number	2020	667.713	1603.44	187.251
1	Deaths	165	Pakistan	1	Male	22	All ages	1048	COVID-19	1	Number	2020	143618	153162	133312
1	Deaths	165	Pakistan	2	Female	22	All ages	1048	COVID-19	1	Number	2020	64073.5	68310.1	59550.2
1	Deaths	165	Pakistan	3	Both	22	All ages	1048	COVID-19	1	Number	2020	207692	221489	192926
1	Deaths	77	Cyprus	1	Male	22	All ages	1048	COVID-19	1	Number	2020	84.1394	218.907	45.1188
1	Deaths	77	Cyprus	2	Female	22	All ages	1048	COVID-19	1	Number	2020	60.8558	166.335	25.2156
1	Deaths	77	Cyprus	3	Both	22	All ages	1048	COVID-19	1	Number	2020	144.995	374.801	77.3194
1	Deaths	41	Uzbekistan	1	Male	22	All ages	1048	COVID-19	1	Number	2020	10140.8	14345.6	4927.06
1	Deaths	41	Uzbekistan	2	Female	22	All ages	1048	COVID-19	1	Number	2020	6528.18	9235	3168.54
1	Deaths	41	Uzbekistan	3	Both	22	All ages	1048	COVID-19	1	Number	2020	16669	23580.6	8095.69
1	Deaths	107	Barbados	1	Male	22	All ages	1048	COVID-19	1	Number	2020	4.61442	4.61442	4.61442
1	Deaths	107	Barbados	2	Female	22	All ages	1048	COVID-19	1	Number	2020	3.24543	3.24543	3.24543
1	Deaths	107	Barbados	3	Both	22	All ages	1048	COVID-19	1	Number	2020	7.85985	7.85985	7.85985
1	Deaths	157	Yemen	1	Male	22	All ages	1048	COVID-19	1	Number	2020	10115.3	11822.6	8082.83
1	Deaths	157	Yemen	2	Female	22	All ages	1048	COVID-19	1	Number	2020	5182.12	6054.95	4133.33
1	Deaths	157	Yemen	3	Both	22	All ages	1048	COVID-19	1	Number	2020	15297.5	17877.6	12216.3
1	Deaths	17	Sri Lanka	1	Male	22	All ages	1048	COVID-19	1	Number	2020	369.293	369.293	369.293
1	Deaths	17	Sri Lanka	2	Female	22	All ages	1048	COVID-19	1	Number	2020	255.332	255.332	255.332
1	Deaths	17	Sri Lanka	3	Both	22	All ages	1048	COVID-19	1	Number	2020	624.625	624.625	624.625
1	Deaths	161	Bangladesh	1	Male	22	All ages	1048	COVID-19	1	Number	2020	83404.1	112390	71518.3
1	Deaths	161	Bangladesh	2	Female	22	All ages	1048	COVID-19	1	Number	2020	37971.7	51177	32543.4
1	Deaths	161	Bangladesh	3	Both	22	All ages	1048	COVID-19	1	Number	2020	121376	163567	104062
1	Deaths	58	Estonia	1	Male	22	All ages	1048	COVID-19	1	Number	2020	158.813	391.488	81.3162
1	Deaths	58	Estonia	2	Female	22	All ages	1048	COVID-19	1	Number	2020	151.737	374.091	76.2885
1	Deaths	58	Estonia	3	Both	22	All ages	1048	COVID-19	1	Number	2020	310.551	754.173	162.178
1	Deaths	74	Andorra	1	Male	22	All ages	1048	COVID-19	1	Number	2020	56.0298	102.607	32.1698
1	Deaths	74	Andorra	2	Female	22	All ages	1048	COVID-19	1	Number	2020	27.9431	48.9394	16.7022
1	Deaths	74	Andorra	3	Both	22	All ages	1048	COVID-19	1	Number	2020	83.9729	151.947	49.4217
1	Deaths	208	Guinea	1	Male	22	All ages	1048	COVID-19	1	Number	2020	7662.33	9245.78	6407.35
1	Deaths	208	Guinea	2	Female	22	All ages	1048	COVID-19	1	Number	2020	3968.63	4797.77	3325.72
1	Deaths	208	Guinea	3	Both	22	All ages	1048	COVID-19	1	Number	2020	11631	14044.4	9733.07
1	Deaths	79	Finland	1	Male	22	All ages	1048	COVID-19	1	Number	2020	415.182	675.241	288.621
1	Deaths	79	Finland	2	Female	22	All ages	1048	COVID-19	1	Number	2020	354.256	575.445	243.722
1	Deaths	79	Finland	3	Both	22	All ages	1048	COVID-19	1	Number	2020	769.438	1245.59	534.373
1	Deaths	175	Burundi	1	Male	22	All ages	1048	COVID-19	1	Number	2020	2434.14	2680.83	2245.03
1	Deaths	175	Burundi	2	Female	22	All ages	1048	COVID-19	1	Number	2020	1181.26	1298.65	1089.12
1	Deaths	175	Burundi	3	Both	22	All ages	1048	COVID-19	1	Number	2020	3615.4	3979.46	3334.27
1	Deaths	23	Kiribati	1	Male	22	All ages	1048	COVID-19	1	Number	2020	2.5e-09	2.5e-09	2.5e-09
1	Deaths	23	Kiribati	2	Female	22	All ages	1048	COVID-19	1	Number	2020	2.5e-09	2.5e-09	2.5e-09
1	Deaths	23	Kiribati	3	Both	22	All ages	1048	COVID-19	1	Number	2020	5e-09	5e-09	5e-09
1	Deaths	75	Austria	1	Male	22	All ages	1048	COVID-19	1	Number	2020	4262.17	4513.35	4023.28
1	Deaths	75	Austria	2	Female	22	All ages	1048	COVID-19	1	Number	2020	3302.77	3478.51	3138.07
1	Deaths	75	Austria	3	Both	22	All ages	1048	COVID-19	1	Number	2020	7564.94	7975.05	7182.06
1	Deaths	209	Guinea-Bissau	1	Male	22	All ages	1048	COVID-19	1	Number	2020	1464.7	1662.9	1286.73
1	Deaths	209	Guinea-Bissau	2	Female	22	All ages	1048	COVID-19	1	Number	2020	862.898	979.911	757.841
1	Deaths	209	Guinea-Bissau	3	Both	22	All ages	1048	COVID-19	1	Number	2020	2327.6	2643.16	2044.57
1	Deaths	94	Switzerland	1	Male	22	All ages	1048	COVID-19	1	Number	2020	4460.28	4793.89	4182.48
1	Deaths	94	Switzerland	2	Female	22	All ages	1048	COVID-19	1	Number	2020	3195.64	3422.49	2986.02
1	Deaths	94	Switzerland	3	Both	22	All ages	1048	COVID-19	1	Number	2020	7655.92	8189.01	7204.86
1	Deaths	169	Central African Republic	1	Male	22	All ages	1048	COVID-19	1	Number	2020	4373.02	5850.45	2895.46
1	Deaths	169	Central African Republic	2	Female	22	All ages	1048	COVID-19	1	Number	2020	2596.63	3478.24	1715.01
1	Deaths	169	Central African Republic	3	Both	22	All ages	1048	COVID-19	1	Number	2020	6969.65	9328.43	4611.24
1	Deaths	81	Germany	1	Male	22	All ages	1048	COVID-19	1	Number	2020	19234.4	21390.8	17823.1
1	Deaths	81	Germany	2	Female	22	All ages	1048	COVID-19	1	Number	2020	14343.5	15954.2	13274.6
1	Deaths	81	Germany	3	Both	22	All ages	1048	COVID-19	1	Number	2020	33577.8	37405.8	31134.4
1	Deaths	22	Fiji	1	Male	22	All ages	1048	COVID-19	1	Number	2020	46.1837	96.3257	11.4604
1	Deaths	22	Fiji	2	Female	22	All ages	1048	COVID-19	1	Number	2020	28.2801	58.9536	7.03603
1	Deaths	22	Fiji	3	Both	22	All ages	1048	COVID-19	1	Number	2020	74.4638	155.279	18.4964
1	Deaths	393	Saint Kitts and Nevis	1	Male	22	All ages	1048	COVID-19	1	Number	2020	0.000414561	0.000600367	2.5e-09
1	Deaths	393	Saint Kitts and Nevis	2	Female	22	All ages	1048	COVID-19	1	Number	2020	0.000334767	0.00060403	2.5e-09
1	Deaths	393	Saint Kitts and Nevis	3	Both	22	All ages	1048	COVID-19	1	Number	2020	0.000749327	0.0012044	0.000382759
1	Deaths	46	Croatia	1	Male	22	All ages	1048	COVID-19	1	Number	2020	2318.58	3255.47	1547.82
1	Deaths	46	Croatia	2	Female	22	All ages	1048	COVID-19	1	Number	2020	1907.27	2696.01	1300.75
1	Deaths	46	Croatia	3	Both	22	All ages	1048	COVID-19	1	Number	2020	4225.85	5920.95	2860.91
1	Deaths	45	Bulgaria	1	Male	22	All ages	1048	COVID-19	1	Number	2020	9466.81	13013.6	5495.82
1	Deaths	45	Bulgaria	2	Female	22	All ages	1048	COVID-19	1	Number	2020	7050.61	9729.9	4030.94
1	Deaths	45	Bulgaria	3	Both	22	All ages	1048	COVID-19	1	Number	2020	16517.4	22596.9	9396.08
1	Deaths	78	Denmark	1	Male	22	All ages	1048	COVID-19	1	Number	2020	710.435	763.332	659.37
1	Deaths	78	Denmark	2	Female	22	All ages	1048	COVID-19	1	Number	2020	607.58	644.248	570.386
1	Deaths	78	Denmark	3	Both	22	All ages	1048	COVID-19	1	Number	2020	1318.01	1391.15	1238.49
1	Deaths	212	Mauritania	1	Male	22	All ages	1048	COVID-19	1	Number	2020	1813.95	2158.69	1384.87
1	Deaths	212	Mauritania	2	Female	22	All ages	1048	COVID-19	1	Number	2020	905.408	1076.93	691.1
1	Deaths	212	Mauritania	3	Both	22	All ages	1048	COVID-19	1	Number	2020	2719.36	3235.62	2075.97
1	Deaths	177	Djibouti	1	Male	22	All ages	1048	COVID-19	1	Number	2020	807.972	976.498	620.346
1	Deaths	177	Djibouti	2	Female	22	All ages	1048	COVID-19	1	Number	2020	346.024	418.043	265.952
1	Deaths	177	Djibouti	3	Both	22	All ages	1048	COVID-19	1	Number	2020	1154	1394.78	886.297
1	Deaths	213	Niger	1	Male	22	All ages	1048	COVID-19	1	Number	2020	7203.86	8216.48	6445.01
1	Deaths	213	Niger	2	Female	22	All ages	1048	COVID-19	1	Number	2020	3780.61	4302.05	3385.18
1	Deaths	213	Niger	3	Both	22	All ages	1048	COVID-19	1	Number	2020	10984.5	12518.7	9830.19
1	Deaths	180	Kenya	1	Male	22	All ages	1048	COVID-19	1	Number	2020	29074.4	31615.7	26815.3
1	Deaths	180	Kenya	2	Female	22	All ages	1048	COVID-19	1	Number	2020	16954.9	18453.4	15625.5
1	Deaths	180	Kenya	3	Both	22	All ages	1048	COVID-19	1	Number	2020	46029.2	50069	42440.8
1	Deaths	140	Bahrain	1	Male	22	All ages	1048	COVID-19	1	Number	2020	626.718	718.759	518.219
1	Deaths	140	Bahrain	2	Female	22	All ages	1048	COVID-19	1	Number	2020	194.486	222.986	160.801
1	Deaths	140	Bahrain	3	Both	22	All ages	1048	COVID-19	1	Number	2020	821.204	941.745	679.044
1	Deaths	99	Uruguay	1	Male	22	All ages	1048	COVID-19	1	Number	2020	102.434	102.434	102.434
1	Deaths	99	Uruguay	2	Female	22	All ages	1048	COVID-19	1	Number	2020	91.9414	91.9414	91.9414
1	Deaths	99	Uruguay	3	Both	22	All ages	1048	COVID-19	1	Number	2020	194.375	194.375	194.375
1	Deaths	214	Nigeria	1	Male	22	All ages	1048	COVID-19	1	Number	2020	56644.3	62025.6	52225.6
1	Deaths	214	Nigeria	2	Female	22	All ages	1048	COVID-19	1	Number	2020	30304.3	33052.8	27934.8
1	Deaths	214	Nigeria	3	Both	22	All ages	1048	COVID-19	1	Number	2020	86948.6	95088.4	80171.7
1	Deaths	125	Colombia	1	Male	22	All ages	1048	COVID-19	1	Number	2020	32618.5	40679	25351.4
1	Deaths	125	Colombia	2	Female	22	All ages	1048	COVID-19	1	Number	2020	16785	21209.5	12176.7
1	Deaths	125	Colombia	3	Both	22	All ages	1048	COVID-19	1	Number	2020	49403.4	60724.9	37912.6
1	Deaths	86	Italy	1	Male	22	All ages	1048	COVID-19	1	Number	2020	45732.9	47602.3	43789.4
1	Deaths	86	Italy	2	Female	22	All ages	1048	COVID-19	1	Number	2020	37932.4	39504.3	36471.6
1	Deaths	86	Italy	3	Both	22	All ages	1048	COVID-19	1	Number	2020	83665.3	86690.7	80575.8
1	Deaths	176	Comoros	1	Male	22	All ages	1048	COVID-19	1	Number	2020	174.499	192.857	161.479
1	Deaths	176	Comoros	2	Female	22	All ages	1048	COVID-19	1	Number	2020	105.168	116.236	97.3123
1	Deaths	176	Comoros	3	Both	22	All ages	1048	COVID-19	1	Number	2020	279.666	309.091	258.791
1	Deaths	51	Poland	1	Male	22	All ages	1048	COVID-19	1	Number	2020	29654.6	38598.7	21969.4
1	Deaths	51	Poland	2	Female	22	All ages	1048	COVID-19	1	Number	2020	23841.7	31015.8	17704.3
1	Deaths	51	Poland	3	Both	22	All ages	1048	COVID-19	1	Number	2020	53496.3	67510.5	42901
1	Deaths	217	Sierra Leone	1	Male	22	All ages	1048	COVID-19	1	Number	2020	3304.44	3885.75	2876.7
1	Deaths	217	Sierra Leone	2	Female	22	All ages	1048	COVID-19	1	Number	2020	1692.92	1989.73	1475.12
1	Deaths	217	Sierra Leone	3	Both	22	All ages	1048	COVID-19	1	Number	2020	4997.36	5875.48	4352.74
1	Deaths	129	Honduras	1	Male	22	All ages	1048	COVID-19	1	Number	2020	6175.08	7046.07	5219.05
1	Deaths	129	Honduras	2	Female	22	All ages	1048	COVID-19	1	Number	2020	3496	3988.51	2953.35
1	Deaths	129	Honduras	3	Both	22	All ages	1048	COVID-19	1	Number	2020	9671.08	11036.2	8172.4
1	Deaths	218	Togo	1	Male	22	All ages	1048	COVID-19	1	Number	2020	1661.49	1925.29	1426.1
1	Deaths	218	Togo	2	Female	22	All ages	1048	COVID-19	1	Number	2020	1113.19	1288.62	956.981
1	Deaths	218	Togo	3	Both	22	All ages	1048	COVID-19	1	Number	2020	2774.68	3213.91	2383.06
1	Deaths	130	Mexico	1	Male	22	All ages	1048	COVID-19	1	Number	2020	173188	215330	133805
1	Deaths	130	Mexico	2	Female	22	All ages	1048	COVID-19	1	Number	2020	99527	125686	73434.6
1	Deaths	130	Mexico	3	Both	22	All ages	1048	COVID-19	1	Number	2020	272715	327322	222408
1	Deaths	185	Rwanda	1	Male	22	All ages	1048	COVID-19	1	Number	2020	1092.97	1293.5	718.014
1	Deaths	185	Rwanda	2	Female	22	All ages	1048	COVID-19	1	Number	2020	784.783	928.871	515.627
1	Deaths	185	Rwanda	3	Both	22	All ages	1048	COVID-19	1	Number	2020	1877.75	2222.38	1233.6
1	Deaths	91	Portugal	1	Male	22	All ages	1048	COVID-19	1	Number	2020	4898.48	5417.84	4351.43
1	Deaths	91	Portugal	2	Female	22	All ages	1048	COVID-19	1	Number	2020	4240.2	4673.53	3759.58
1	Deaths	91	Portugal	3	Both	22	All ages	1048	COVID-19	1	Number	2020	9138.68	10050.8	8121.31
1	Deaths	193	Botswana	1	Male	22	All ages	1048	COVID-19	1	Number	2020	519.756	592.706	459.406
1	Deaths	193	Botswana	2	Female	22	All ages	1048	COVID-19	1	Number	2020	359.478	409.932	317.745
1	Deaths	193	Botswana	3	Both	22	All ages	1048	COVID-19	1	Number	2020	879.234	1002.63	777.152
1	Deaths	190	Uganda	1	Male	22	All ages	1048	COVID-19	1	Number	2020	7631.84	8851.94	4946.83
1	Deaths	190	Uganda	2	Female	22	All ages	1048	COVID-19	1	Number	2020	5184.91	6015.17	3362.5
1	Deaths	190	Uganda	3	Both	22	All ages	1048	COVID-19	1	Number	2020	12816.7	14867.8	8309.33
1	Deaths	55	Slovenia	1	Male	22	All ages	1048	COVID-19	1	Number	2020	1471.36	1946.45	984.866
1	Deaths	55	Slovenia	2	Female	22	All ages	1048	COVID-19	1	Number	2020	1348.19	1754.33	959.328
1	Deaths	55	Slovenia	3	Both	22	All ages	1048	COVID-19	1	Number	2020	2819.55	3694.32	1982.06
1	Deaths	197	Eswatini	1	Male	22	All ages	1048	COVID-19	1	Number	2020	1121.19	1248.77	1026.9
1	Deaths	197	Eswatini	2	Female	22	All ages	1048	COVID-19	1	Number	2020	827.881	921.33	758.005
1	Deaths	197	Eswatini	3	Both	22	All ages	1048	COVID-19	1	Number	2020	1949.07	2170.28	1784.9
1	Deaths	139	Algeria	1	Male	22	All ages	1048	COVID-19	1	Number	2020	29465.1	30060.9	28815.1
1	Deaths	139	Algeria	2	Female	22	All ages	1048	COVID-19	1	Number	2020	13530.3	13799.9	13226
1	Deaths	139	Algeria	3	Both	22	All ages	1048	COVID-19	1	Number	2020	42995.4	43860.5	42043.8
1	Deaths	63	Ukraine	1	Male	22	All ages	1048	COVID-19	1	Number	2020	13293.3	31909.9	2288.34
1	Deaths	63	Ukraine	2	Female	22	All ages	1048	COVID-19	1	Number	2020	12999.3	29432.4	2341.97
1	Deaths	63	Ukraine	3	Both	22	All ages	1048	COVID-19	1	Number	2020	26292.6	54241	8384.87
1	Deaths	108	Belize	1	Male	22	All ages	1048	COVID-19	1	Number	2020	180.719	222.244	144.909
1	Deaths	108	Belize	2	Female	22	All ages	1048	COVID-19	1	Number	2020	85.4624	101.62	70.2031
1	Deaths	108	Belize	3	Both	22	All ages	1048	COVID-19	1	Number	2020	266.182	316.99	217.938
1	Deaths	95	United Kingdom	1	Male	22	All ages	1048	COVID-19	1	Number	2020	50015.2	52500.3	47601.1
1	Deaths	95	United Kingdom	2	Female	22	All ages	1048	COVID-19	1	Number	2020	38532.4	40557.1	36481.8
1	Deaths	95	United Kingdom	3	Both	22	All ages	1048	COVID-19	1	Number	2020	88547.6	91938.6	85077
1	Deaths	202	Cameroon	1	Male	22	All ages	1048	COVID-19	1	Number	2020	8404.72	9052.48	7812.6
1	Deaths	202	Cameroon	2	Female	22	All ages	1048	COVID-19	1	Number	2020	4618.2	4970.57	4278.15
1	Deaths	202	Cameroon	3	Both	22	All ages	1048	COVID-19	1	Number	2020	13022.9	14023	12094.8
1	Deaths	128	Guatemala	1	Male	22	All ages	1048	COVID-19	1	Number	2020	8382.29	11080.2	6008
1	Deaths	128	Guatemala	2	Female	22	All ages	1048	COVID-19	1	Number	2020	3998.52	5332.84	2769.26
1	Deaths	128	Guatemala	3	Both	22	All ages	1048	COVID-19	1	Number	2020	12380.8	16373.3	8696.31
1	Deaths	195	Namibia	1	Male	22	All ages	1048	COVID-19	1	Number	2020	953.587	1088.49	854.569
1	Deaths	195	Namibia	2	Female	22	All ages	1048	COVID-19	1	Number	2020	680.024	776.172	609.235
1	Deaths	195	Namibia	3	Both	22	All ages	1048	COVID-19	1	Number	2020	1633.61	1864.57	1463.64
1	Deaths	112	Grenada	1	Male	22	All ages	1048	COVID-19	1	Number	2020	2.5e-09	2.5e-09	2.5e-09
1	Deaths	112	Grenada	2	Female	22	All ages	1048	COVID-19	1	Number	2020	2.5e-09	2.5e-09	2.5e-09
1	Deaths	112	Grenada	3	Both	22	All ages	1048	COVID-19	1	Number	2020	5e-09	5e-09	5e-09
1	Deaths	14	Maldives	1	Male	22	All ages	1048	COVID-19	1	Number	2020	35.5338	61.1316	20.9267
1	Deaths	14	Maldives	2	Female	22	All ages	1048	COVID-19	1	Number	2020	16.4675	29.3516	10.2572
1	Deaths	14	Maldives	3	Both	22	All ages	1048	COVID-19	1	Number	2020	52.0013	89.1468	32.2904
1	Deaths	207	Ghana	1	Male	22	All ages	1048	COVID-19	1	Number	2020	8881.46	9810.92	8031.23
1	Deaths	207	Ghana	2	Female	22	All ages	1048	COVID-19	1	Number	2020	5636.69	6225.21	5096.09
1	Deaths	207	Ghana	3	Both	22	All ages	1048	COVID-19	1	Number	2020	14518.1	16036.3	13130.7
1	Deaths	29	Tonga	1	Male	22	All ages	1048	COVID-19	1	Number	2020	2.5e-09	2.5e-09	2.5e-09
1	Deaths	29	Tonga	2	Female	22	All ages	1048	COVID-19	1	Number	2020	2.5e-09	2.5e-09	2.5e-09
1	Deaths	29	Tonga	3	Both	22	All ages	1048	COVID-19	1	Number	2020	5e-09	5e-09	5e-09
1	Deaths	47	Czechia	1	Male	22	All ages	1048	COVID-19	1	Number	2020	7461.04	10250.7	5039.26
1	Deaths	47	Czechia	2	Female	22	All ages	1048	COVID-19	1	Number	2020	5651.73	7817.06	3878.94
1	Deaths	47	Czechia	3	Both	22	All ages	1048	COVID-19	1	Number	2020	13112.8	18019.3	8923.93
1	Deaths	146	Lebanon	1	Male	22	All ages	1048	COVID-19	1	Number	2020	4114.96	4773.42	3542
1	Deaths	146	Lebanon	2	Female	22	All ages	1048	COVID-19	1	Number	2020	2488.08	2885.28	2141.05
1	Deaths	146	Lebanon	3	Both	22	All ages	1048	COVID-19	1	Number	2020	6603.05	7658.71	5683.1
1	Deaths	111	Dominican Republic	1	Male	22	All ages	1048	COVID-19	1	Number	2020	2780.7	5492.69	1143.74
1	Deaths	111	Dominican Republic	2	Female	22	All ages	1048	COVID-19	1	Number	2020	1308.13	2577.49	570.104
1	Deaths	111	Dominican Republic	3	Both	22	All ages	1048	COVID-19	1	Number	2020	4088.83	8057.16	1724.92
1	Deaths	105	Antigua and Barbuda	1	Male	22	All ages	1048	COVID-19	1	Number	2020	2.97703	3.61116	2.43604
1	Deaths	105	Antigua and Barbuda	2	Female	22	All ages	1048	COVID-19	1	Number	2020	2.02205	2.49648	1.6481
1	Deaths	105	Antigua and Barbuda	3	Both	22	All ages	1048	COVID-19	1	Number	2020	4.99909	6.05736	4.17939
1	Deaths	33	Armenia	1	Male	22	All ages	1048	COVID-19	1	Number	2020	3137.84	4076.22	2164.87
1	Deaths	33	Armenia	2	Female	22	All ages	1048	COVID-19	1	Number	2020	2319.55	3019.53	1565.08
1	Deaths	33	Armenia	3	Both	22	All ages	1048	COVID-19	1	Number	2020	5457.39	6965.69	3783.35
1	Deaths	143	Iraq	1	Male	22	All ages	1048	COVID-19	1	Number	2020	32260.9	38055.2	27040.7
1	Deaths	143	Iraq	2	Female	22	All ages	1048	COVID-19	1	Number	2020	16889.8	19926.7	14168.3
1	Deaths	143	Iraq	3	Both	22	All ages	1048	COVID-19	1	Number	2020	49150.7	57981.9	41210.6
1	Deaths	38	Mongolia	1	Male	22	All ages	1048	COVID-19	1	Number	2020	0.77088	1.48161	0.3171
1	Deaths	38	Mongolia	2	Female	22	All ages	1048	COVID-19	1	Number	2020	0.567935	1.07436	0.239753
1	Deaths	38	Mongolia	3	Both	22	All ages	1048	COVID-19	1	Number	2020	1.33882	2.54713	0.587088
1	Deaths	396	San Marino	1	Male	22	All ages	1048	COVID-19	1	Number	2020	26.2537	37.7542	18.9861
1	Deaths	396	San Marino	2	Female	22	All ages	1048	COVID-19	1	Number	2020	32.7377	46.2257	22.0747
1	Deaths	396	San Marino	3	Both	22	All ages	1048	COVID-19	1	Number	2020	58.9914	82.9765	41.4541
1	Deaths	179	Ethiopia	1	Male	22	All ages	1048	COVID-19	1	Number	2020	39982.9	43235.3	37110
1	Deaths	179	Ethiopia	2	Female	22	All ages	1048	COVID-19	1	Number	2020	19054.4	20597.5	17686.8
1	Deaths	179	Ethiopia	3	Both	22	All ages	1048	COVID-19	1	Number	2020	59037.3	63812	54804.3
1	Deaths	43	Albania	1	Male	22	All ages	1048	COVID-19	1	Number	2020	2198.9	3483.31	909.635
1	Deaths	43	Albania	2	Female	22	All ages	1048	COVID-19	1	Number	2020	1323.83	2131.49	569.53
1	Deaths	43	Albania	3	Both	22	All ages	1048	COVID-19	1	Number	2020	3522.73	5647.1	1457.4
1	Deaths	194	Lesotho	1	Male	22	All ages	1048	COVID-19	1	Number	2020	1362.59	1502.08	1216.27
1	Deaths	194	Lesotho	2	Female	22	All ages	1048	COVID-19	1	Number	2020	1115.24	1229.09	995.982
1	Deaths	194	Lesotho	3	Both	22	All ages	1048	COVID-19	1	Number	2020	2477.83	2731.17	2212.22
1	Deaths	162	Bhutan	1	Male	22	All ages	1048	COVID-19	1	Number	2020	2.5e-09	2.5e-09	2.5e-09
1	Deaths	162	Bhutan	2	Female	22	All ages	1048	COVID-19	1	Number	2020	2.5e-09	2.5e-09	2.5e-09
1	Deaths	162	Bhutan	3	Both	22	All ages	1048	COVID-19	1	Number	2020	5e-09	5e-09	5e-09
1	Deaths	113	Guyana	1	Male	22	All ages	1048	COVID-19	1	Number	2020	390.051	680.794	168.658
1	Deaths	113	Guyana	2	Female	22	All ages	1048	COVID-19	1	Number	2020	228.577	399.07	98.8004
1	Deaths	113	Guyana	3	Both	22	All ages	1048	COVID-19	1	Number	2020	618.628	1079.86	267.458
1	Deaths	127	El Salvador	1	Male	22	All ages	1048	COVID-19	1	Number	2020	2671.77	3136.12	2214.48
1	Deaths	127	El Salvador	2	Female	22	All ages	1048	COVID-19	1	Number	2020	2055.74	2412.99	1703.81
1	Deaths	127	El Salvador	3	Both	22	All ages	1048	COVID-19	1	Number	2020	4727.52	5549.24	3918.3
1	Deaths	320	Cook Islands	1	Male	22	All ages	1048	COVID-19	1	Number	2020	2.5e-09	2.5e-09	2.5e-09
1	Deaths	320	Cook Islands	2	Female	22	All ages	1048	COVID-19	1	Number	2020	2.5e-09	2.5e-09	2.5e-09
1	Deaths	320	Cook Islands	3	Both	22	All ages	1048	COVID-19	1	Number	2020	5e-09	5e-09	5e-09
1	Deaths	349	Greenland	1	Male	22	All ages	1048	COVID-19	1	Number	2020	2.5e-09	2.5e-09	2.5e-09
1	Deaths	349	Greenland	2	Female	22	All ages	1048	COVID-19	1	Number	2020	2.5e-09	2.5e-09	2.5e-09
1	Deaths	349	Greenland	3	Both	22	All ages	1048	COVID-19	1	Number	2020	5e-09	5e-09	5e-09
1	Deaths	132	Panama	1	Male	22	All ages	1048	COVID-19	1	Number	2020	3125.37	3923.57	2363.71
1	Deaths	132	Panama	2	Female	22	All ages	1048	COVID-19	1	Number	2020	1722.81	2156.01	1303.1
1	Deaths	132	Panama	3	Both	22	All ages	1048	COVID-19	1	Number	2020	4848.18	6089.37	3664.43
1	Deaths	522	Sudan	1	Male	22	All ages	1048	COVID-19	1	Number	2020	20756.6	25443.5	15291.9
1	Deaths	522	Sudan	2	Female	22	All ages	1048	COVID-19	1	Number	2020	8913.88	10940.7	6564.11
1	Deaths	522	Sudan	3	Both	22	All ages	1048	COVID-19	1	Number	2020	29670.5	36384	21855.9
1	Deaths	211	Mali	1	Male	22	All ages	1048	COVID-19	1	Number	2020	11510	12487.8	10353.1
1	Deaths	211	Mali	2	Female	22	All ages	1048	COVID-19	1	Number	2020	5387.6	5854.45	4833.36
1	Deaths	211	Mali	3	Both	22	All ages	1048	COVID-19	1	Number	2020	16897.6	18326.6	15186.3
1	Deaths	136	Paraguay	1	Male	22	All ages	1048	COVID-19	1	Number	2020	1462.02	2248.48	806.834
1	Deaths	136	Paraguay	2	Female	22	All ages	1048	COVID-19	1	Number	2020	919.274	1444.19	482.596
1	Deaths	136	Paraguay	3	Both	22	All ages	1048	COVID-19	1	Number	2020	2381.3	3604.47	1371.13
1	Deaths	298	American Samoa	1	Male	22	All ages	1048	COVID-19	1	Number	2020	2.5e-09	2.5e-09	2.5e-09
1	Deaths	298	American Samoa	2	Female	22	All ages	1048	COVID-19	1	Number	2020	2.5e-09	2.5e-09	2.5e-09
1	Deaths	298	American Samoa	3	Both	22	All ages	1048	COVID-19	1	Number	2020	5e-09	5e-09	5e-09
1	Deaths	141	Egypt	1	Male	22	All ages	1048	COVID-19	1	Number	2020	51226.6	67714.3	35360.8
1	Deaths	141	Egypt	2	Female	22	All ages	1048	COVID-19	1	Number	2020	19719	26064.5	13618.8
1	Deaths	141	Egypt	3	Both	22	All ages	1048	COVID-19	1	Number	2020	70945.5	93778.8	48974.9
1	Deaths	34	Azerbaijan	1	Male	22	All ages	1048	COVID-19	1	Number	2020	8986.75	11471.9	6420.45
1	Deaths	34	Azerbaijan	2	Female	22	All ages	1048	COVID-19	1	Number	2020	6462.34	8310.05	4733.56
1	Deaths	34	Azerbaijan	3	Both	22	All ages	1048	COVID-19	1	Number	2020	15449.1	19272	11458.4
1	Deaths	145	Kuwait	1	Male	22	All ages	1048	COVID-19	1	Number	2020	1581.84	2062.94	1093.2
1	Deaths	145	Kuwait	2	Female	22	All ages	1048	COVID-19	1	Number	2020	407.29	519.58	301.311
1	Deaths	145	Kuwait	3	Both	22	All ages	1048	COVID-19	1	Number	2020	1989.13	2553.69	1412.7
1	Deaths	163	India	1	Male	22	All ages	1048	COVID-19	1	Number	2020	621966	657838	584386
1	Deaths	163	India	2	Female	22	All ages	1048	COVID-19	1	Number	2020	341136	361037	320066
1	Deaths	163	India	3	Both	22	All ages	1048	COVID-19	1	Number	2020	963102	1.01897e+06	904589
1	Deaths	305	Bermuda	1	Male	22	All ages	1048	COVID-19	1	Number	2020	5.6293	7.15914	4.34121
1	Deaths	305	Bermuda	2	Female	22	All ages	1048	COVID-19	1	Number	2020	4.36978	5.50918	3.5556
1	Deaths	305	Bermuda	3	Both	22	All ages	1048	COVID-19	1	Number	2020	9.99909	12.4129	8.10279
1	Deaths	84	Ireland	1	Male	22	All ages	1048	COVID-19	1	Number	2020	1267.6	1384.95	1157.03
1	Deaths	84	Ireland	2	Female	22	All ages	1048	COVID-19	1	Number	2020	969.362	1053.59	891.826
1	Deaths	84	Ireland	3	Both	22	All ages	1048	COVID-19	1	Number	2020	2236.96	2428.2	2054.87
1	Deaths	178	Eritrea	1	Male	22	All ages	1048	COVID-19	1	Number	2020	433.132	843.887	322.342
1	Deaths	178	Eritrea	2	Female	22	All ages	1048	COVID-19	1	Number	2020	303.567	591.452	225.919
1	Deaths	178	Eritrea	3	Both	22	All ages	1048	COVID-19	1	Number	2020	736.699	1435.34	548.261
1	Deaths	50	Montenegro	1	Male	22	All ages	1048	COVID-19	1	Number	2020	546.635	714.42	410.833
1	Deaths	50	Montenegro	2	Female	22	All ages	1048	COVID-19	1	Number	2020	301.984	381.444	244.493
1	Deaths	50	Montenegro	3	Both	22	All ages	1048	COVID-19	1	Number	2020	848.62	1067.07	668.101
1	Deaths	82	Greece	1	Male	22	All ages	1048	COVID-19	1	Number	2020	2979.55	3148.08	2814.83
1	Deaths	82	Greece	2	Female	22	All ages	1048	COVID-19	1	Number	2020	1951.26	2070.09	1840.99
1	Deaths	82	Greece	3	Both	22	All ages	1048	COVID-19	1	Number	2020	4930.82	5178.3	4704.89
1	Deaths	182	Malawi	1	Male	22	All ages	1048	COVID-19	1	Number	2020	4021.03	4432.14	3658.6
1	Deaths	182	Malawi	2	Female	22	All ages	1048	COVID-19	1	Number	2020	2624.21	2896.25	2384.74
1	Deaths	182	Malawi	3	Both	22	All ages	1048	COVID-19	1	Number	2020	6645.24	7328.39	6043.25
1	Deaths	10	Cambodia	1	Male	22	All ages	1048	COVID-19	1	Number	2020	2.5e-09	2.5e-09	2.5e-09
1	Deaths	10	Cambodia	2	Female	22	All ages	1048	COVID-19	1	Number	2020	2.5e-09	2.5e-09	2.5e-09
1	Deaths	10	Cambodia	3	Both	22	All ages	1048	COVID-19	1	Number	2020	5e-09	5e-09	5e-09
1	Deaths	170	Congo	1	Male	22	All ages	1048	COVID-19	1	Number	2020	2679.72	3016.27	2133.3
1	Deaths	170	Congo	2	Female	22	All ages	1048	COVID-19	1	Number	2020	1413.49	1590.43	1125.04
1	Deaths	170	Congo	3	Both	22	All ages	1048	COVID-19	1	Number	2020	4093.21	4606.7	3258.4
1	Deaths	187	Somalia	1	Male	22	All ages	1048	COVID-19	1	Number	2020	12265.6	14716.1	9711.37
1	Deaths	187	Somalia	2	Female	22	All ages	1048	COVID-19	1	Number	2020	7714.5	9238.65	6124.05
1	Deaths	187	Somalia	3	Both	22	All ages	1048	COVID-19	1	Number	2020	19980.1	23954.8	15835.2
1	Deaths	15	Myanmar	1	Male	22	All ages	1048	COVID-19	1	Number	2020	7469.79	15083.8	2969.06
1	Deaths	15	Myanmar	2	Female	22	All ages	1048	COVID-19	1	Number	2020	5189.53	10473.9	2060.18
1	Deaths	15	Myanmar	3	Both	22	All ages	1048	COVID-19	1	Number	2020	12659.3	25557.7	5030.13
1	Deaths	210	Liberia	1	Male	22	All ages	1048	COVID-19	1	Number	2020	1840.03	2231	1617.34
1	Deaths	210	Liberia	2	Female	22	All ages	1048	COVID-19	1	Number	2020	864.908	1047.8	759.293
1	Deaths	210	Liberia	3	Both	22	All ages	1048	COVID-19	1	Number	2020	2704.94	3278.51	2376.63
1	Deaths	181	Madagascar	1	Male	22	All ages	1048	COVID-19	1	Number	2020	12716.6	13738.7	11731.5
1	Deaths	181	Madagascar	2	Female	22	All ages	1048	COVID-19	1	Number	2020	6858.95	7412.12	6328.08
1	Deaths	181	Madagascar	3	Both	22	All ages	1048	COVID-19	1	Number	2020	19575.5	21150.8	18059.6
1	Deaths	67	Japan	1	Male	22	All ages	1048	COVID-19	1	Number	2020	1996.96	2282.15	1727.09
1	Deaths	67	Japan	2	Female	22	All ages	1048	COVID-19	1	Number	2020	1479.78	1728.8	1248.13
1	Deaths	67	Japan	3	Both	22	All ages	1048	COVID-19	1	Number	2020	3476.73	3932.37	3103.92
1	Deaths	19	Timor-Leste	1	Male	22	All ages	1048	COVID-19	1	Number	2020	2.5e-09	2.5e-09	2.5e-09
1	Deaths	19	Timor-Leste	2	Female	22	All ages	1048	COVID-19	1	Number	2020	2.5e-09	2.5e-09	2.5e-09
1	Deaths	19	Timor-Leste	3	Both	22	All ages	1048	COVID-19	1	Number	2020	5e-09	5e-09	5e-09
1	Deaths	52	Romania	1	Male	22	All ages	1048	COVID-19	1	Number	2020	17583.6	24490.9	10985.6
1	Deaths	52	Romania	2	Female	22	All ages	1048	COVID-19	1	Number	2020	12753.4	18001.8	7992.19
1	Deaths	52	Romania	3	Both	22	All ages	1048	COVID-19	1	Number	2020	30337	42202.5	18929.6
1	Deaths	116	Saint Lucia	1	Male	22	All ages	1048	COVID-19	1	Number	2020	22.9191	39.6991	10.0488
1	Deaths	116	Saint Lucia	2	Female	22	All ages	1048	COVID-19	1	Number	2020	14.9191	25.844	6.54233
1	Deaths	116	Saint Lucia	3	Both	22	All ages	1048	COVID-19	1	Number	2020	37.8382	65.5432	16.5911
1	Deaths	200	Benin	1	Male	22	All ages	1048	COVID-19	1	Number	2020	1989.75	2414.38	1484.32
1	Deaths	200	Benin	2	Female	22	All ages	1048	COVID-19	1	Number	2020	1213.98	1473.31	905.749
1	Deaths	200	Benin	3	Both	22	All ages	1048	COVID-19	1	Number	2020	3203.72	3887.69	2390.07
1	Deaths	24	Marshall Islands	1	Male	22	All ages	1048	COVID-19	1	Number	2020	2.5e-09	2.5e-09	2.5e-09
1	Deaths	24	Marshall Islands	2	Female	22	All ages	1048	COVID-19	1	Number	2020	2.5e-09	2.5e-09	2.5e-09
1	Deaths	24	Marshall Islands	3	Both	22	All ages	1048	COVID-19	1	Number	2020	5e-09	5e-09	5e-09
1	Deaths	150	Oman	1	Male	22	All ages	1048	COVID-19	1	Number	2020	1347.01	1471.8	1210.84
1	Deaths	150	Oman	2	Female	22	All ages	1048	COVID-19	1	Number	2020	760.544	840.811	682.138
1	Deaths	150	Oman	3	Both	22	All ages	1048	COVID-19	1	Number	2020	2107.55	2312.45	1897.36
1	Deaths	183	Mauritius	1	Male	22	All ages	1048	COVID-19	1	Number	2020	6.51506	9.49841	3.69753
1	Deaths	183	Mauritius	2	Female	22	All ages	1048	COVID-19	1	Number	2020	3.65715	5.53637	2.02219
1	Deaths	183	Mauritius	3	Both	22	All ages	1048	COVID-19	1	Number	2020	10.1722	14.9492	6.00896
1	Deaths	198	Zimbabwe	1	Male	22	All ages	1048	COVID-19	1	Number	2020	8037.35	8990.32	6894.57
1	Deaths	198	Zimbabwe	2	Female	22	All ages	1048	COVID-19	1	Number	2020	5311.63	5939.32	4542.37
1	Deaths	198	Zimbabwe	3	Both	22	All ages	1048	COVID-19	1	Number	2020	13349	14929.9	11438.2
1	Deaths	133	Venezuela (Bolivarian Republic of)	1	Male	22	All ages	1048	COVID-19	1	Number	2020	29160.5	31640.8	26511
1	Deaths	133	Venezuela (Bolivarian Republic of)	2	Female	22	All ages	1048	COVID-19	1	Number	2020	19478.3	21134.2	17708
1	Deaths	133	Venezuela (Bolivarian Republic of)	3	Both	22	All ages	1048	COVID-19	1	Number	2020	48638.8	52775.7	44219.3
1	Deaths	118	Suriname	1	Male	22	All ages	1048	COVID-19	1	Number	2020	72.5596	75.8139	72.0766
1	Deaths	118	Suriname	2	Female	22	All ages	1048	COVID-19	1	Number	2020	50.1104	52.3496	49.7656
1	Deaths	118	Suriname	3	Both	22	All ages	1048	COVID-19	1	Number	2020	122.67	128.164	121.845
1	Deaths	144	Jordan	1	Male	22	All ages	1048	COVID-19	1	Number	2020	5043.68	6497.75	3275.32
1	Deaths	144	Jordan	2	Female	22	All ages	1048	COVID-19	1	Number	2020	2141.92	2759.32	1393.17
1	Deaths	144	Jordan	3	Both	22	All ages	1048	COVID-19	1	Number	2020	7185.6	9257.47	4668.43
1	Deaths	115	Jamaica	1	Male	22	All ages	1048	COVID-19	1	Number	2020	183.978	184.135	183.829
1	Deaths	115	Jamaica	2	Female	22	All ages	1048	COVID-19	1	Number	2020	120.963	121.095	120.837
1	Deaths	115	Jamaica	3	Both	22	All ages	1048	COVID-19	1	Number	2020	304.941	305.229	304.666
1	Deaths	367	Monaco	1	Male	22	All ages	1048	COVID-19	1	Number	2020	5.49361	17.704	1.70741
1	Deaths	367	Monaco	2	Female	22	All ages	1048	COVID-19	1	Number	2020	4.15757	13.3982	1.29221
1	Deaths	367	Monaco	3	Both	22	All ages	1048	COVID-19	1	Number	2020	9.65118	31.1022	2.99976
1	Deaths	203	Cabo Verde	1	Male	22	All ages	1048	COVID-19	1	Number	2020	85.9553	120.021	64.732
1	Deaths	203	Cabo Verde	2	Female	22	All ages	1048	COVID-19	1	Number	2020	64.0028	89.3697	48.1814
1	Deaths	203	Cabo Verde	3	Both	22	All ages	1048	COVID-19	1	Number	2020	149.958	209.391	112.914
1	Deaths	148	Morocco	1	Male	22	All ages	1048	COVID-19	1	Number	2020	28037.8	33014.5	22448.6
1	Deaths	148	Morocco	2	Female	22	All ages	1048	COVID-19	1	Number	2020	14484.4	17060.2	11596.2
1	Deaths	148	Morocco	3	Both	22	All ages	1048	COVID-19	1	Number	2020	42522.2	50074.7	34048.2
1	Deaths	153	Syrian Arab Republic	1	Male	22	All ages	1048	COVID-19	1	Number	2020	3866.53	4730.55	2889.64
1	Deaths	153	Syrian Arab Republic	2	Female	22	All ages	1048	COVID-19	1	Number	2020	1724.89	2110.03	1287.85
1	Deaths	153	Syrian Arab Republic	3	Both	22	All ages	1048	COVID-19	1	Number	2020	5591.42	6840.58	4177.49
1	Deaths	351	Guam	1	Male	22	All ages	1048	COVID-19	1	Number	2020	78.9595	91.3107	68.3627
1	Deaths	351	Guam	2	Female	22	All ages	1048	COVID-19	1	Number	2020	42.0314	50.5987	34.0356
1	Deaths	351	Guam	3	Both	22	All ages	1048	COVID-19	1	Number	2020	120.991	138.664	106.927
1	Deaths	216	Senegal	1	Male	22	All ages	1048	COVID-19	1	Number	2020	6524.39	7087.67	5453.74
1	Deaths	216	Senegal	2	Female	22	All ages	1048	COVID-19	1	Number	2020	3629.98	3949.69	3033.77
1	Deaths	216	Senegal	3	Both	22	All ages	1048	COVID-19	1	Number	2020	10154.4	11037	8487.43
1	Deaths	164	Nepal	1	Male	22	All ages	1048	COVID-19	1	Number	2020	15259.7	16596.4	10454.1
1	Deaths	164	Nepal	2	Female	22	All ages	1048	COVID-19	1	Number	2020	8534.92	9282.23	5844.49
1	Deaths	164	Nepal	3	Both	22	All ages	1048	COVID-19	1	Number	2020	23794.7	25879.9	16299
1	Deaths	149	Palestine	1	Male	22	All ages	1048	COVID-19	1	Number	2020	893.319	892.415	890.995
1	Deaths	149	Palestine	2	Female	22	All ages	1048	COVID-19	1	Number	2020	507.107	507.564	505.14
1	Deaths	149	Palestine	3	Both	22	All ages	1048	COVID-19	1	Number	2020	1400.43	1399.98	1396.31
1	Deaths	172	Equatorial Guinea	1	Male	22	All ages	1048	COVID-19	1	Number	2020	703.654	919.152	537.242
1	Deaths	172	Equatorial Guinea	2	Female	22	All ages	1048	COVID-19	1	Number	2020	437.079	570.84	333.534
1	Deaths	172	Equatorial Guinea	3	Both	22	All ages	1048	COVID-19	1	Number	2020	1140.73	1490.31	870.958
1	Deaths	88	Malta	1	Male	22	All ages	1048	COVID-19	1	Number	2020	119.663	152.118	95.4881
1	Deaths	88	Malta	2	Female	22	All ages	1048	COVID-19	1	Number	2020	99.3113	122.114	83.9453
1	Deaths	88	Malta	3	Both	22	All ages	1048	COVID-19	1	Number	2020	218.974	271.731	180.808
1	Deaths	35	Georgia	1	Male	22	All ages	1048	COVID-19	1	Number	2020	2535.82	3234.73	1795.66
1	Deaths	35	Georgia	2	Female	22	All ages	1048	COVID-19	1	Number	2020	2931.11	3739.59	2085.3
1	Deaths	35	Georgia	3	Both	22	All ages	1048	COVID-19	1	Number	2020	5466.93	6934.11	3866.16
1	Deaths	376	Northern Mariana Islands	1	Male	22	All ages	1048	COVID-19	1	Number	2020	2.07024	2.98053	1.44812
1	Deaths	376	Northern Mariana Islands	2	Female	22	All ages	1048	COVID-19	1	Number	2020	1.28253	1.55808	1.0326
1	Deaths	376	Northern Mariana Islands	3	Both	22	All ages	1048	COVID-19	1	Number	2020	3.35278	4.44925	2.53731
1	Deaths	39	Tajikistan	1	Male	22	All ages	1048	COVID-19	1	Number	2020	6418.68	7713.04	4855.22
1	Deaths	39	Tajikistan	2	Female	22	All ages	1048	COVID-19	1	Number	2020	3411.42	4098.17	2580.68
1	Deaths	39	Tajikistan	3	Both	22	All ages	1048	COVID-19	1	Number	2020	9830.09	11812.1	7435.9
1	Deaths	374	Niue	1	Male	22	All ages	1048	COVID-19	1	Number	2020	2.5e-09	2.5e-09	2.5e-09
1	Deaths	374	Niue	2	Female	22	All ages	1048	COVID-19	1	Number	2020	2.5e-09	2.5e-09	2.5e-09
1	Deaths	374	Niue	3	Both	22	All ages	1048	COVID-19	1	Number	2020	5e-09	5e-09	5e-09
1	Deaths	171	Democratic Republic of the Congo	1	Male	22	All ages	1048	COVID-19	1	Number	2020	30797.2	33762.8	28066.6
1	Deaths	171	Democratic Republic of the Congo	2	Female	22	All ages	1048	COVID-19	1	Number	2020	18837.4	20684.8	17163.4
1	Deaths	171	Democratic Republic of the Congo	3	Both	22	All ages	1048	COVID-19	1	Number	2020	49634.6	54447.3	45243.7
1	Deaths	117	Saint Vincent and the Grenadines	1	Male	22	All ages	1048	COVID-19	1	Number	2020	0.0010115	0.00147364	2.5e-09
1	Deaths	117	Saint Vincent and the Grenadines	2	Female	22	All ages	1048	COVID-19	1	Number	2020	0.000800916	0.0013833	2.5e-09
1	Deaths	117	Saint Vincent and the Grenadines	3	Both	22	All ages	1048	COVID-19	1	Number	2020	0.00181242	0.00285693	0.000972177
1	Deaths	57	Belarus	1	Male	22	All ages	1048	COVID-19	1	Number	2020	9043.68	11264.1	7138.15
1	Deaths	57	Belarus	2	Female	22	All ages	1048	COVID-19	1	Number	2020	9443.89	11762.9	7453.8
1	Deaths	57	Belarus	3	Both	22	All ages	1048	COVID-19	1	Number	2020	18487.6	23027	14591.9
1	Deaths	54	Slovakia	1	Male	22	All ages	1048	COVID-19	1	Number	2020	2147.88	3426.87	1001.48
1	Deaths	54	Slovakia	2	Female	22	All ages	1048	COVID-19	1	Number	2020	1767.6	2840.75	860.376
1	Deaths	54	Slovakia	3	Both	22	All ages	1048	COVID-19	1	Number	2020	3915.47	6222.56	1901.21
1	Deaths	151	Qatar	1	Male	22	All ages	1048	COVID-19	1	Number	2020	381.959	469.443	274.039
1	Deaths	151	Qatar	2	Female	22	All ages	1048	COVID-19	1	Number	2020	74.77	88.6763	55.6475
1	Deaths	151	Qatar	3	Both	22	All ages	1048	COVID-19	1	Number	2020	456.729	556.706	331.256
1	Deaths	184	Mozambique	1	Male	22	All ages	1048	COVID-19	1	Number	2020	4275.05	6142.29	2586.08
1	Deaths	184	Mozambique	2	Female	22	All ages	1048	COVID-19	1	Number	2020	2811.05	4040.24	1702.24
1	Deaths	184	Mozambique	3	Both	22	All ages	1048	COVID-19	1	Number	2020	7086.1	10181.2	4288.76
1	Deaths	83	Iceland	1	Male	22	All ages	1048	COVID-19	1	Number	2020	20.1094	24.1343	16.3776
1	Deaths	83	Iceland	2	Female	22	All ages	1048	COVID-19	1	Number	2020	12.89	14.6626	11.5541
1	Deaths	83	Iceland	3	Both	22	All ages	1048	COVID-19	1	Number	2020	32.9994	38.2145	28.1774
1	Deaths	215	Sao Tome and Principe	1	Male	22	All ages	1048	COVID-19	1	Number	2020	46.9184	51.5537	42.4561
1	Deaths	215	Sao Tome and Principe	2	Female	22	All ages	1048	COVID-19	1	Number	2020	27.1554	29.8418	24.5966
1	Deaths	215	Sao Tome and Principe	3	Both	22	All ages	1048	COVID-19	1	Number	2020	74.0738	81.381	67.0562
1	Deaths	186	Seychelles	1	Male	22	All ages	1048	COVID-19	1	Number	2020	2.5e-09	2.5e-09	2.5e-09
1	Deaths	186	Seychelles	2	Female	22	All ages	1048	COVID-19	1	Number	2020	2.5e-09	2.5e-09	2.5e-09
1	Deaths	186	Seychelles	3	Both	22	All ages	1048	COVID-19	1	Number	2020	5e-09	5e-09	5e-09
1	Deaths	122	Ecuador	1	Male	22	All ages	1048	COVID-19	1	Number	2020	23508.1	27973.1	19002.9
1	Deaths	122	Ecuador	2	Female	22	All ages	1048	COVID-19	1	Number	2020	12781.9	14990.6	10444.9
1	Deaths	122	Ecuador	3	Both	22	All ages	1048	COVID-19	1	Number	2020	36290	42957	29598.5
1	Deaths	72	New Zealand	1	Male	22	All ages	1048	COVID-19	1	Number	2020	16.5483	18.2696	15.0203
1	Deaths	72	New Zealand	2	Female	22	All ages	1048	COVID-19	1	Number	2020	9.52773	10.5165	8.55371
1	Deaths	72	New Zealand	3	Both	22	All ages	1048	COVID-19	1	Number	2020	26.076	28.1157	24.2113
1	Deaths	87	Luxembourg	1	Male	22	All ages	1048	COVID-19	1	Number	2020	272.515	354.134	193.881
1	Deaths	87	Luxembourg	2	Female	22	All ages	1048	COVID-19	1	Number	2020	222.461	256.866	188.305
1	Deaths	87	Luxembourg	3	Both	22	All ages	1048	COVID-19	1	Number	2020	494.976	599.366	393.119
1	Deaths	121	Bolivia (Plurinational State of)	1	Male	22	All ages	1048	COVID-19	1	Number	2020	20887.2	23807.6	17372.6
1	Deaths	121	Bolivia (Plurinational State of)	2	Female	22	All ages	1048	COVID-19	1	Number	2020	11870.2	13530.5	9867.72
1	Deaths	121	Bolivia (Plurinational State of)	3	Both	22	All ages	1048	COVID-19	1	Number	2020	32757.4	37338.1	27240.3
1	Deaths	204	Chad	1	Male	22	All ages	1048	COVID-19	1	Number	2020	7713.53	9148.76	6445.32
1	Deaths	204	Chad	2	Female	22	All ages	1048	COVID-19	1	Number	2020	3420.86	4067.83	2850.69
1	Deaths	204	Chad	3	Both	22	All ages	1048	COVID-19	1	Number	2020	11134.4	13216.6	9296.02
1	Deaths	89	Netherlands	1	Male	22	All ages	1048	COVID-19	1	Number	2020	7384.06	8168.58	6534.14
1	Deaths	89	Netherlands	2	Female	22	All ages	1048	COVID-19	1	Number	2020	5460.96	5985.5	4856.07
1	Deaths	89	Netherlands	3	Both	22	All ages	1048	COVID-19	1	Number	2020	12845	14171.1	11429.8
1	Deaths	168	Angola	1	Male	22	All ages	1048	COVID-19	1	Number	2020	7721.78	8988.68	6293.63
1	Deaths	168	Angola	2	Female	22	All ages	1048	COVID-19	1	Number	2020	4674.66	5451.95	3808.48
1	Deaths	168	Angola	3	Both	22	All ages	1048	COVID-19	1	Number	2020	12396.4	14440.6	10099.8
1	Deaths	154	Tunisia	1	Male	22	All ages	1048	COVID-19	1	Number	2020	3967.88	6967.29	2975.36
1	Deaths	154	Tunisia	2	Female	22	All ages	1048	COVID-19	1	Number	2020	2264.46	3975.69	1697.43
1	Deaths	154	Tunisia	3	Both	22	All ages	1048	COVID-19	1	Number	2020	6232.34	10943	4673.26
1	Deaths	155	Turkey	1	Male	22	All ages	1048	COVID-19	1	Number	2020	56970.2	68766.3	43163.6
1	Deaths	155	Turkey	2	Female	22	All ages	1048	COVID-19	1	Number	2020	35094	42370.3	26582.1
1	Deaths	155	Turkey	3	Both	22	All ages	1048	COVID-19	1	Number	2020	92064.1	111137	69746.1
1	Deaths	369	Nauru	1	Male	22	All ages	1048	COVID-19	1	Number	2020	2.5e-09	2.5e-09	2.5e-09
1	Deaths	369	Nauru	2	Female	22	All ages	1048	COVID-19	1	Number	2020	2.5e-09	2.5e-09	2.5e-09
1	Deaths	369	Nauru	3	Both	22	All ages	1048	COVID-19	1	Number	2020	5e-09	5e-09	5e-09
1	Deaths	123	Peru	1	Male	22	All ages	1048	COVID-19	1	Number	2020	61647.5	77940.1	46831.5
1	Deaths	123	Peru	2	Female	22	All ages	1048	COVID-19	1	Number	2020	33152.3	44065.7	23507.5
1	Deaths	123	Peru	3	Both	22	All ages	1048	COVID-19	1	Number	2020	94799.8	118999	74261.6
1	Deaths	189	United Republic of Tanzania	1	Male	22	All ages	1048	COVID-19	1	Number	2020	19915.4	21584.8	18394.6
1	Deaths	189	United Republic of Tanzania	2	Female	22	All ages	1048	COVID-19	1	Number	2020	11497.2	12456.2	10627.3
1	Deaths	189	United Republic of Tanzania	3	Both	22	All ages	1048	COVID-19	1	Number	2020	31412.6	34047	29021.6
1	Deaths	173	Gabon	1	Male	22	All ages	1048	COVID-19	1	Number	2020	1043.73	1134.27	958.847
1	Deaths	173	Gabon	2	Female	22	All ages	1048	COVID-19	1	Number	2020	618.491	671.814	568.382
1	Deaths	173	Gabon	3	Both	22	All ages	1048	COVID-19	1	Number	2020	1662.22	1806.09	1527.28
1	Deaths	185	Rwanda	1	Male	22	All ages	1048	COVID-19	1	Number	2021	8371.89	9310.5	6907.09
1	Deaths	185	Rwanda	2	Female	22	All ages	1048	COVID-19	1	Number	2021	5758.41	6409.78	4758.54
1	Deaths	185	Rwanda	3	Both	22	All ages	1048	COVID-19	1	Number	2021	14130.3	15718.9	11665.7
1	Deaths	6	China	1	Male	22	All ages	1048	COVID-19	1	Number	2021	645.205	2448.29	51.6575
1	Deaths	6	China	2	Female	22	All ages	1048	COVID-19	1	Number	2021	417.646	1575.24	33.7727
1	Deaths	6	China	3	Both	22	All ages	1048	COVID-19	1	Number	2021	1062.85	4023.53	85.4302
1	Deaths	38	Mongolia	1	Male	22	All ages	1048	COVID-19	1	Number	2021	1287.66	2164.18	608.022
1	Deaths	38	Mongolia	2	Female	22	All ages	1048	COVID-19	1	Number	2021	886.115	1545.25	431.276
1	Deaths	38	Mongolia	3	Both	22	All ages	1048	COVID-19	1	Number	2021	2173.77	3617.79	1057.94
1	Deaths	201	Burkina Faso	1	Male	22	All ages	1048	COVID-19	1	Number	2021	11470.6	13020.3	9329.18
1	Deaths	201	Burkina Faso	2	Female	22	All ages	1048	COVID-19	1	Number	2021	6646.93	7553.04	5403.06
1	Deaths	201	Burkina Faso	3	Both	22	All ages	1048	COVID-19	1	Number	2021	18117.5	20570.8	14732.9
1	Deaths	54	Slovakia	1	Male	22	All ages	1048	COVID-19	1	Number	2021	8698.6	11509.7	5977.45
1	Deaths	54	Slovakia	2	Female	22	All ages	1048	COVID-19	1	Number	2021	7266.78	9414.3	5093.58
1	Deaths	54	Slovakia	3	Both	22	All ages	1048	COVID-19	1	Number	2021	15965.4	20919.7	11089.3
1	Deaths	55	Slovenia	1	Male	22	All ages	1048	COVID-19	1	Number	2021	1694.37	2488.89	1015.69
1	Deaths	55	Slovenia	2	Female	22	All ages	1048	COVID-19	1	Number	2021	1403	1942.38	951.925
1	Deaths	55	Slovenia	3	Both	22	All ages	1048	COVID-19	1	Number	2021	3097.38	4444.98	1972.84
1	Deaths	169	Central African Republic	1	Male	22	All ages	1048	COVID-19	1	Number	2021	3808.24	5828.81	2144.6
1	Deaths	169	Central African Republic	2	Female	22	All ages	1048	COVID-19	1	Number	2021	2281.01	3489.42	1288.77
1	Deaths	169	Central African Republic	3	Both	22	All ages	1048	COVID-19	1	Number	2021	6089.26	9318.83	3432.14
1	Deaths	87	Luxembourg	1	Male	22	All ages	1048	COVID-19	1	Number	2021	241.621	300.87	180.833
1	Deaths	87	Luxembourg	2	Female	22	All ages	1048	COVID-19	1	Number	2021	178.385	211.624	144.53
1	Deaths	87	Luxembourg	3	Both	22	All ages	1048	COVID-19	1	Number	2021	420.006	508.254	329.521
1	Deaths	22	Fiji	1	Male	22	All ages	1048	COVID-19	1	Number	2021	723.855	1436.89	438.502
1	Deaths	22	Fiji	2	Female	22	All ages	1048	COVID-19	1	Number	2021	425.276	844.37	257.507
1	Deaths	22	Fiji	3	Both	22	All ages	1048	COVID-19	1	Number	2021	1149.13	2281.26	696.231
1	Deaths	71	Australia	1	Male	22	All ages	1048	COVID-19	1	Number	2021	1963.01	2300.75	1590.7
1	Deaths	71	Australia	2	Female	22	All ages	1048	COVID-19	1	Number	2021	1455.38	1705.81	1179.3
1	Deaths	71	Australia	3	Both	22	All ages	1048	COVID-19	1	Number	2021	3418.39	4006.56	2770
1	Deaths	23	Kiribati	1	Male	22	All ages	1048	COVID-19	1	Number	2021	2.5e-09	2.5e-09	2.5e-09
1	Deaths	23	Kiribati	2	Female	22	All ages	1048	COVID-19	1	Number	2021	2.5e-09	2.5e-09	2.5e-09
1	Deaths	23	Kiribati	3	Both	22	All ages	1048	COVID-19	1	Number	2021	5e-09	5e-09	5e-09
1	Deaths	7	Democratic People's Republic of Korea	1	Male	22	All ages	1048	COVID-19	1	Number	2021	2.27984	10.2698	0.144394
1	Deaths	7	Democratic People's Republic of Korea	2	Female	22	All ages	1048	COVID-19	1	Number	2021	3.23025	14.5511	0.204589
1	Deaths	7	Democratic People's Republic of Korea	3	Both	22	All ages	1048	COVID-19	1	Number	2021	5.51009	24.8209	0.348983
1	Deaths	88	Malta	1	Male	22	All ages	1048	COVID-19	1	Number	2021	119.07	139.323	102.923
1	Deaths	88	Malta	2	Female	22	All ages	1048	COVID-19	1	Number	2021	137.912	151.296	127.126
1	Deaths	88	Malta	3	Both	22	All ages	1048	COVID-19	1	Number	2021	256.982	288.02	230.945
1	Deaths	121	Bolivia (Plurinational State of)	1	Male	22	All ages	1048	COVID-19	1	Number	2021	25422.7	28024.3	21793.9
1	Deaths	121	Bolivia (Plurinational State of)	2	Female	22	All ages	1048	COVID-19	1	Number	2021	14580.6	16071.9	12498.6
1	Deaths	121	Bolivia (Plurinational State of)	3	Both	22	All ages	1048	COVID-19	1	Number	2021	40003.3	44096.2	34291.4
1	Deaths	105	Antigua and Barbuda	1	Male	22	All ages	1048	COVID-19	1	Number	2021	69.0481	69.062	69.0398
1	Deaths	105	Antigua and Barbuda	2	Female	22	All ages	1048	COVID-19	1	Number	2021	44.9519	44.9574	44.9434
1	Deaths	105	Antigua and Barbuda	3	Both	22	All ages	1048	COVID-19	1	Number	2021	114	114.019	113.986
1	Deaths	72	New Zealand	1	Male	22	All ages	1048	COVID-19	1	Number	2021	14.9903	16.6645	13.3963
1	Deaths	72	New Zealand	2	Female	22	All ages	1048	COVID-19	1	Number	2021	11.0093	12.0911	9.90702
1	Deaths	72	New Zealand	3	Both	22	All ages	1048	COVID-19	1	Number	2021	25.9996	27.962	23.797
1	Deaths	8	Taiwan (Province of China)	1	Male	22	All ages	1048	COVID-19	1	Number	2021	1232.53	5181.33	315.936
1	Deaths	8	Taiwan (Province of China)	2	Female	22	All ages	1048	COVID-19	1	Number	2021	730.972	3161.85	174.693
1	Deaths	8	Taiwan (Province of China)	3	Both	22	All ages	1048	COVID-19	1	Number	2021	1963.5	8273.02	497.177
1	Deaths	203	Cabo Verde	1	Male	22	All ages	1048	COVID-19	1	Number	2021	137.933	149.19	136.819
1	Deaths	203	Cabo Verde	2	Female	22	All ages	1048	COVID-19	1	Number	2021	102.718	111.137	101.853
1	Deaths	203	Cabo Verde	3	Both	22	All ages	1048	COVID-19	1	Number	2021	240.651	260.32	238.684
1	Deaths	170	Congo	1	Male	22	All ages	1048	COVID-19	1	Number	2021	3581.84	4604.05	2508.88
1	Deaths	170	Congo	2	Female	22	All ages	1048	COVID-19	1	Number	2021	1891.57	2433.27	1326.42
1	Deaths	170	Congo	3	Both	22	All ages	1048	COVID-19	1	Number	2021	5473.42	7037.32	3835.92
1	Deaths	153	Syrian Arab Republic	1	Male	22	All ages	1048	COVID-19	1	Number	2021	8132.65	10857.5	5366.46
1	Deaths	153	Syrian Arab Republic	2	Female	22	All ages	1048	COVID-19	1	Number	2021	3661.26	4886.38	2418.51
1	Deaths	153	Syrian Arab Republic	3	Both	22	All ages	1048	COVID-19	1	Number	2021	11793.9	15743.8	7784.88
1	Deaths	186	Seychelles	1	Male	22	All ages	1048	COVID-19	1	Number	2021	76.829	86.503	69.967
1	Deaths	186	Seychelles	2	Female	22	All ages	1048	COVID-19	1	Number	2021	57.1658	71.7432	43.0566
1	Deaths	186	Seychelles	3	Both	22	All ages	1048	COVID-19	1	Number	2021	133.995	151.444	118.202
1	Deaths	39	Tajikistan	1	Male	22	All ages	1048	COVID-19	1	Number	2021	7957.66	9603.62	5859.46
1	Deaths	39	Tajikistan	2	Female	22	All ages	1048	COVID-19	1	Number	2021	4245.44	5117.35	3127.39
1	Deaths	39	Tajikistan	3	Both	22	All ages	1048	COVID-19	1	Number	2021	12203.1	14721	8986.84
1	Deaths	154	Tunisia	1	Male	22	All ages	1048	COVID-19	1	Number	2021	16332.3	19850.2	13271.6
1	Deaths	154	Tunisia	2	Female	22	All ages	1048	COVID-19	1	Number	2021	9369.7	11386.9	7611.06
1	Deaths	154	Tunisia	3	Both	22	All ages	1048	COVID-19	1	Number	2021	25702	31237.1	20883
1	Deaths	89	Netherlands	1	Male	22	All ages	1048	COVID-19	1	Number	2021	6915.92	7670.86	6110.82
1	Deaths	89	Netherlands	2	Female	22	All ages	1048	COVID-19	1	Number	2021	5374.78	5905.75	4776.11
1	Deaths	89	Netherlands	3	Both	22	All ages	1048	COVID-19	1	Number	2021	12290.7	13562.4	10910
1	Deaths	40	Turkmenistan	1	Male	22	All ages	1048	COVID-19	1	Number	2021	3638.23	4401.12	2684.23
1	Deaths	40	Turkmenistan	2	Female	22	All ages	1048	COVID-19	1	Number	2021	2638.24	3191.04	1946.7
1	Deaths	40	Turkmenistan	3	Both	22	All ages	1048	COVID-19	1	Number	2021	6276.48	7592.16	4630.96
1	Deaths	26	Papua New Guinea	1	Male	22	All ages	1048	COVID-19	1	Number	2021	6077.11	11976.1	1335.1
1	Deaths	26	Papua New Guinea	2	Female	22	All ages	1048	COVID-19	1	Number	2021	2699.61	5318.94	595.357
1	Deaths	26	Papua New Guinea	3	Both	22	All ages	1048	COVID-19	1	Number	2021	8776.71	17295	1928.55
1	Deaths	59	Latvia	1	Male	22	All ages	1048	COVID-19	1	Number	2021	2900.48	4082.14	1879.03
1	Deaths	59	Latvia	2	Female	22	All ages	1048	COVID-19	1	Number	2021	2820.06	4019.51	1789.55
1	Deaths	59	Latvia	3	Both	22	All ages	1048	COVID-19	1	Number	2021	5720.53	7813.45	3685
1	Deaths	205	C么te d'Ivoire	1	Male	22	All ages	1048	COVID-19	1	Number	2021	11815	13765.5	10194.6
1	Deaths	205	C么te d'Ivoire	2	Female	22	All ages	1048	COVID-19	1	Number	2021	5580.84	6511.38	4819.44
1	Deaths	205	C么te d'Ivoire	3	Both	22	All ages	1048	COVID-19	1	Number	2021	17395.9	20276.8	15014.4
1	Deaths	171	Democratic Republic of the Congo	1	Male	22	All ages	1048	COVID-19	1	Number	2021	50109.1	60374.7	42862.2
1	Deaths	171	Democratic Republic of the Congo	2	Female	22	All ages	1048	COVID-19	1	Number	2021	30557.8	36830.2	26159.1
1	Deaths	171	Democratic Republic of the Congo	3	Both	22	All ages	1048	COVID-19	1	Number	2021	80666.9	97204.9	69021.3
1	Deaths	190	Uganda	1	Male	22	All ages	1048	COVID-19	1	Number	2021	24823.6	30430.6	15729.9
1	Deaths	190	Uganda	2	Female	22	All ages	1048	COVID-19	1	Number	2021	16727.9	20516.5	10605
1	Deaths	190	Uganda	3	Both	22	All ages	1048	COVID-19	1	Number	2021	41551.5	50947.2	26337.4
1	Deaths	187	Somalia	1	Male	22	All ages	1048	COVID-19	1	Number	2021	17796.1	24235.1	12947.1
1	Deaths	187	Somalia	2	Female	22	All ages	1048	COVID-19	1	Number	2021	11219.8	15223.6	8129.02
1	Deaths	187	Somalia	3	Both	22	All ages	1048	COVID-19	1	Number	2021	29015.9	39458.7	21076.9
1	Deaths	206	Gambia	1	Male	22	All ages	1048	COVID-19	1	Number	2021	1231.37	1448.97	1022.51
1	Deaths	206	Gambia	2	Female	22	All ages	1048	COVID-19	1	Number	2021	709.006	832.163	588.539
1	Deaths	206	Gambia	3	Both	22	All ages	1048	COVID-19	1	Number	2021	1940.38	2281.15	1610.68
1	Deaths	10	Cambodia	1	Male	22	All ages	1048	COVID-19	1	Number	2021	5159	10154.5	1728.68
1	Deaths	10	Cambodia	2	Female	22	All ages	1048	COVID-19	1	Number	2021	3821.03	7524.42	1280.64
1	Deaths	10	Cambodia	3	Both	22	All ages	1048	COVID-19	1	Number	2021	8980.03	17678.9	3009.27
1	Deaths	75	Austria	1	Male	22	All ages	1048	COVID-19	1	Number	2021	5440.63	5708.94	5156.63
1	Deaths	75	Austria	2	Female	22	All ages	1048	COVID-19	1	Number	2021	4276.66	4464.55	4081.59
1	Deaths	75	Austria	3	Both	22	All ages	1048	COVID-19	1	Number	2021	9717.29	10155.4	9264.72
1	Deaths	92	Spain	1	Male	22	All ages	1048	COVID-19	1	Number	2021	22132.5	23040.5	21216.8
1	Deaths	92	Spain	2	Female	22	All ages	1048	COVID-19	1	Number	2021	16956.5	17609.5	16327.2
1	Deaths	92	Spain	3	Both	22	All ages	1048	COVID-19	1	Number	2021	39089	40401.4	37616.9
1	Deaths	12	Lao People's Democratic Republic	1	Male	22	All ages	1048	COVID-19	1	Number	2021	2044.88	4100.29	794.153
1	Deaths	12	Lao People's Democratic Republic	2	Female	22	All ages	1048	COVID-19	1	Number	2021	1165.94	2338.6	453.366
1	Deaths	12	Lao People's Democratic Republic	3	Both	22	All ages	1048	COVID-19	1	Number	2021	3210.82	6438.9	1247.52
1	Deaths	11	Indonesia	1	Male	22	All ages	1048	COVID-19	1	Number	2021	156853	298834	83178.8
1	Deaths	11	Indonesia	2	Female	22	All ages	1048	COVID-19	1	Number	2021	84162.6	160567	44830.1
1	Deaths	11	Indonesia	3	Both	22	All ages	1048	COVID-19	1	Number	2021	241015	459401	128009
1	Deaths	191	Zambia	1	Male	22	All ages	1048	COVID-19	1	Number	2021	22749.2	28990.9	16715.2
1	Deaths	191	Zambia	2	Female	22	All ages	1048	COVID-19	1	Number	2021	12422.5	15848.9	9119.07
1	Deaths	191	Zambia	3	Both	22	All ages	1048	COVID-19	1	Number	2021	35171.7	44839.8	25834.2
1	Deaths	43	Albania	1	Male	22	All ages	1048	COVID-19	1	Number	2021	2982.9	4485.42	1342.62
1	Deaths	43	Albania	2	Female	22	All ages	1048	COVID-19	1	Number	2021	1767.51	2657.76	795.542
1	Deaths	43	Albania	3	Both	22	All ages	1048	COVID-19	1	Number	2021	4750.41	7143.18	2138.17
1	Deaths	122	Ecuador	1	Male	22	All ages	1048	COVID-19	1	Number	2021	17151.2	20721.9	12838.5
1	Deaths	122	Ecuador	2	Female	22	All ages	1048	COVID-19	1	Number	2021	10312.2	12459.5	7712.86
1	Deaths	122	Ecuador	3	Both	22	All ages	1048	COVID-19	1	Number	2021	27463.4	33181.4	20551.4
1	Deaths	27	Samoa	1	Male	22	All ages	1048	COVID-19	1	Number	2021	2.5e-09	2.5e-09	2.5e-09
1	Deaths	27	Samoa	2	Female	22	All ages	1048	COVID-19	1	Number	2021	2.5e-09	2.5e-09	2.5e-09
1	Deaths	27	Samoa	3	Both	22	All ages	1048	COVID-19	1	Number	2021	5e-09	5e-09	5e-09
1	Deaths	60	Lithuania	1	Male	22	All ages	1048	COVID-19	1	Number	2021	3651.01	5206.94	2279.55
1	Deaths	60	Lithuania	2	Female	22	All ages	1048	COVID-19	1	Number	2021	3707.6	5246.28	2306.25
1	Deaths	60	Lithuania	3	Both	22	All ages	1048	COVID-19	1	Number	2021	7358.61	10352.2	4593.37
1	Deaths	109	Cuba	1	Male	22	All ages	1048	COVID-19	1	Number	2021	28348.5	33572.9	23403.1
1	Deaths	109	Cuba	2	Female	22	All ages	1048	COVID-19	1	Number	2021	18334.6	21713.7	15135.4
1	Deaths	109	Cuba	3	Both	22	All ages	1048	COVID-19	1	Number	2021	46683.1	55286.6	38538.5
1	Deaths	210	Liberia	1	Male	22	All ages	1048	COVID-19	1	Number	2021	2188.9	2561.68	1836.54
1	Deaths	210	Liberia	2	Female	22	All ages	1048	COVID-19	1	Number	2021	1038.75	1215.28	873.472
1	Deaths	210	Liberia	3	Both	22	All ages	1048	COVID-19	1	Number	2021	3227.66	3776.95	2710.02
1	Deaths	41	Uzbekistan	1	Male	22	All ages	1048	COVID-19	1	Number	2021	8442.18	13690.2	1376.57
1	Deaths	41	Uzbekistan	2	Female	22	All ages	1048	COVID-19	1	Number	2021	5440.44	8820.33	887.389
1	Deaths	41	Uzbekistan	3	Both	22	All ages	1048	COVID-19	1	Number	2021	13882.6	22510.5	2263.96
1	Deaths	76	Belgium	1	Male	22	All ages	1048	COVID-19	1	Number	2021	4837.74	5056.31	4599.7
1	Deaths	76	Belgium	2	Female	22	All ages	1048	COVID-19	1	Number	2021	3788.21	3960.12	3621.96
1	Deaths	76	Belgium	3	Both	22	All ages	1048	COVID-19	1	Number	2021	8625.95	8949.2	8281.17
1	Deaths	77	Cyprus	1	Male	22	All ages	1048	COVID-19	1	Number	2021	326.228	433.737	255.26
1	Deaths	77	Cyprus	2	Female	22	All ages	1048	COVID-19	1	Number	2021	217.682	333.628	133.728
1	Deaths	77	Cyprus	3	Both	22	All ages	1048	COVID-19	1	Number	2021	543.91	738.463	409.131
1	Deaths	162	Bhutan	1	Male	22	All ages	1048	COVID-19	1	Number	2021	69.4209	85.4777	55.9091
1	Deaths	162	Bhutan	2	Female	22	All ages	1048	COVID-19	1	Number	2021	35.7713	44.0405	28.8207
1	Deaths	162	Bhutan	3	Both	22	All ages	1048	COVID-19	1	Number	2021	105.192	129.519	84.7286
1	Deaths	110	Dominica	1	Male	22	All ages	1048	COVID-19	1	Number	2021	67.7184	121.019	28.9838
1	Deaths	110	Dominica	2	Female	22	All ages	1048	COVID-19	1	Number	2021	46.3141	82.7551	19.8276
1	Deaths	110	Dominica	3	Both	22	All ages	1048	COVID-19	1	Number	2021	114.032	203.774	48.8114
1	Deaths	13	Malaysia	1	Male	22	All ages	1048	COVID-19	1	Number	2021	21380.2	26271.8	20478.4
1	Deaths	13	Malaysia	2	Female	22	All ages	1048	COVID-19	1	Number	2021	10803.5	13273.3	10344.7
1	Deaths	13	Malaysia	3	Both	22	All ages	1048	COVID-19	1	Number	2021	32183.7	39544.7	30823.9
1	Deaths	196	South Africa	1	Male	22	All ages	1048	COVID-19	1	Number	2021	85329.2	85434	85196.1
1	Deaths	196	South Africa	2	Female	22	All ages	1048	COVID-19	1	Number	2021	64340.2	64445.9	64208.5
1	Deaths	196	South Africa	3	Both	22	All ages	1048	COVID-19	1	Number	2021	149669	149877	149419
1	Deaths	208	Guinea	1	Male	22	All ages	1048	COVID-19	1	Number	2021	9055.93	10830.4	6183.06
1	Deaths	208	Guinea	2	Female	22	All ages	1048	COVID-19	1	Number	2021	4682.94	5606.42	3199.96
1	Deaths	208	Guinea	3	Both	22	All ages	1048	COVID-19	1	Number	2021	13738.9	16436.8	9383.04
1	Deaths	97	Argentina	1	Male	22	All ages	1048	COVID-19	1	Number	2021	41183.6	41185.7	41174.6
1	Deaths	97	Argentina	2	Female	22	All ages	1048	COVID-19	1	Number	2021	32606.4	32613.3	32599.5
1	Deaths	97	Argentina	3	Both	22	All ages	1048	COVID-19	1	Number	2021	73790	73799.1	73773.4
1	Deaths	123	Peru	1	Male	22	All ages	1048	COVID-19	1	Number	2021	73156.8	74002.4	72579.8
1	Deaths	123	Peru	2	Female	22	All ages	1048	COVID-19	1	Number	2021	43087.7	43585.9	42743.9
1	Deaths	123	Peru	3	Both	22	All ages	1048	COVID-19	1	Number	2021	116245	117590	115324
1	Deaths	68	Republic of Korea	1	Male	22	All ages	1048	COVID-19	1	Number	2021	5844.33	6503.38	5391.25
1	Deaths	68	Republic of Korea	2	Female	22	All ages	1048	COVID-19	1	Number	2021	4254.68	4734.61	3924.94
1	Deaths	68	Republic of Korea	3	Both	22	All ages	1048	COVID-19	1	Number	2021	10099	11238	9316.19
1	Deaths	44	Bosnia and Herzegovina	1	Male	22	All ages	1048	COVID-19	1	Number	2021	5536.82	5561.8	5522.07
1	Deaths	44	Bosnia and Herzegovina	2	Female	22	All ages	1048	COVID-19	1	Number	2021	3880.57	3898.3	3870
1	Deaths	44	Bosnia and Herzegovina	3	Both	22	All ages	1048	COVID-19	1	Number	2021	9417.39	9460.1	9392.13
1	Deaths	175	Burundi	1	Male	22	All ages	1048	COVID-19	1	Number	2021	5303.35	5746.09	4805.4
1	Deaths	175	Burundi	2	Female	22	All ages	1048	COVID-19	1	Number	2021	2508.27	2715.57	2266.62
1	Deaths	175	Burundi	3	Both	22	All ages	1048	COVID-19	1	Number	2021	7811.62	8463.94	7072.03
1	Deaths	69	Singapore	1	Male	22	All ages	1048	COVID-19	1	Number	2021	675.956	849.397	547.616
1	Deaths	69	Singapore	2	Female	22	All ages	1048	COVID-19	1	Number	2021	470.333	582.178	382.725
1	Deaths	69	Singapore	3	Both	22	All ages	1048	COVID-19	1	Number	2021	1146.29	1429.64	929.719
1	Deaths	74	Andorra	1	Male	22	All ages	1048	COVID-19	1	Number	2021	42.4653	63.1009	35.0008
1	Deaths	74	Andorra	2	Female	22	All ages	1048	COVID-19	1	Number	2021	25.469	37.844	20.991
1	Deaths	74	Andorra	3	Both	22	All ages	1048	COVID-19	1	Number	2021	67.9343	100.945	55.993
1	Deaths	17	Sri Lanka	1	Male	22	All ages	1048	COVID-19	1	Number	2021	10025	18228.7	8766.51
1	Deaths	17	Sri Lanka	2	Female	22	All ages	1048	COVID-19	1	Number	2021	6776.75	12322.3	5926.36
1	Deaths	17	Sri Lanka	3	Both	22	All ages	1048	COVID-19	1	Number	2021	16801.7	30551.2	14697.4
1	Deaths	215	Sao Tome and Principe	1	Male	22	All ages	1048	COVID-19	1	Number	2021	57.7411	63.1967	51.3003
1	Deaths	215	Sao Tome and Principe	2	Female	22	All ages	1048	COVID-19	1	Number	2021	33.3701	36.5207	29.6849
1	Deaths	215	Sao Tome and Principe	3	Both	22	All ages	1048	COVID-19	1	Number	2021	91.1112	99.7208	80.983
1	Deaths	28	Solomon Islands	1	Male	22	All ages	1048	COVID-19	1	Number	2021	2.5e-09	2.5e-09	2.5e-09
1	Deaths	28	Solomon Islands	2	Female	22	All ages	1048	COVID-19	1	Number	2021	2.5e-09	2.5e-09	2.5e-09
1	Deaths	28	Solomon Islands	3	Both	22	All ages	1048	COVID-19	1	Number	2021	5e-09	5e-09	5e-09
1	Deaths	126	Costa Rica	1	Male	22	All ages	1048	COVID-19	1	Number	2021	3196.47	4416.09	2098.46
1	Deaths	126	Costa Rica	2	Female	22	All ages	1048	COVID-19	1	Number	2021	2063.34	2872.13	1370.45
1	Deaths	126	Costa Rica	3	Both	22	All ages	1048	COVID-19	1	Number	2021	5259.81	7215.4	3527.59
1	Deaths	36	Kazakhstan	1	Male	22	All ages	1048	COVID-19	1	Number	2021	21136.8	24791	16758.9
1	Deaths	36	Kazakhstan	2	Female	22	All ages	1048	COVID-19	1	Number	2021	16801.6	19709.1	13322.9
1	Deaths	36	Kazakhstan	3	Both	22	All ages	1048	COVID-19	1	Number	2021	37938.4	44500.1	30079
1	Deaths	93	Sweden	1	Male	22	All ages	1048	COVID-19	1	Number	2021	3181.87	3181.97	3181.69
1	Deaths	93	Sweden	2	Female	22	All ages	1048	COVID-19	1	Number	2021	2353.13	2353.23	2353
1	Deaths	93	Sweden	3	Both	22	All ages	1048	COVID-19	1	Number	2021	5535	5535.19	5534.78
1	Deaths	101	Canada	1	Male	22	All ages	1048	COVID-19	1	Number	2021	15085.9	15942.1	14051.7
1	Deaths	101	Canada	2	Female	22	All ages	1048	COVID-19	1	Number	2021	10503.3	11099.4	9783.31
1	Deaths	101	Canada	3	Both	22	All ages	1048	COVID-19	1	Number	2021	25589.2	27041.5	23835
1	Deaths	195	Namibia	1	Male	22	All ages	1048	COVID-19	1	Number	2021	3765.24	4471.76	3154.31
1	Deaths	195	Namibia	2	Female	22	All ages	1048	COVID-19	1	Number	2021	2697.18	3204.53	2257.71
1	Deaths	195	Namibia	3	Both	22	All ages	1048	COVID-19	1	Number	2021	6462.42	7676.29	5412.02
1	Deaths	14	Maldives	1	Male	22	All ages	1048	COVID-19	1	Number	2021	156.143	204.953	152.444
1	Deaths	14	Maldives	2	Female	22	All ages	1048	COVID-19	1	Number	2021	61.8034	81.1091	60.3084
1	Deaths	14	Maldives	3	Both	22	All ages	1048	COVID-19	1	Number	2021	217.947	286.062	212.772
1	Deaths	16	Philippines	1	Male	22	All ages	1048	COVID-19	1	Number	2021	103317	105131	102319
1	Deaths	16	Philippines	2	Female	22	All ages	1048	COVID-19	1	Number	2021	62537.9	63658.2	61919.6
1	Deaths	16	Philippines	3	Both	22	All ages	1048	COVID-19	1	Number	2021	165855	168794	164238
1	Deaths	81	Germany	1	Male	22	All ages	1048	COVID-19	1	Number	2021	45672.1	47588.6	43525.7
1	Deaths	81	Germany	2	Female	22	All ages	1048	COVID-19	1	Number	2021	32813.2	34015.5	31573.3
1	Deaths	81	Germany	3	Both	22	All ages	1048	COVID-19	1	Number	2021	78485.3	81388.9	75095.2
1	Deaths	57	Belarus	1	Male	22	All ages	1048	COVID-19	1	Number	2021	15141.5	19579.3	11798.3
1	Deaths	57	Belarus	2	Female	22	All ages	1048	COVID-19	1	Number	2021	15789.8	20419.5	12303.4
1	Deaths	57	Belarus	3	Both	22	All ages	1048	COVID-19	1	Number	2021	30931.3	39998.9	24102.3
1	Deaths	114	Haiti	1	Male	22	All ages	1048	COVID-19	1	Number	2021	10864.4	19970.2	4662.86
1	Deaths	114	Haiti	2	Female	22	All ages	1048	COVID-19	1	Number	2021	5840.46	10721.7	2508.89
1	Deaths	114	Haiti	3	Both	22	All ages	1048	COVID-19	1	Number	2021	16704.8	30691.8	7172.12
1	Deaths	193	Botswana	1	Male	22	All ages	1048	COVID-19	1	Number	2021	4507.63	5490.36	3279.64
1	Deaths	193	Botswana	2	Female	22	All ages	1048	COVID-19	1	Number	2021	3040.9	3703.49	2212.76
1	Deaths	193	Botswana	3	Both	22	All ages	1048	COVID-19	1	Number	2021	7548.52	9193.85	5492.37
1	Deaths	48	Hungary	1	Male	22	All ages	1048	COVID-19	1	Number	2021	16524.1	22094.8	11259.7
1	Deaths	48	Hungary	2	Female	22	All ages	1048	COVID-19	1	Number	2021	13974.4	18759.7	9567.15
1	Deaths	48	Hungary	3	Both	22	All ages	1048	COVID-19	1	Number	2021	30498.5	40549.5	20805.7
1	Deaths	47	Czechia	1	Male	22	All ages	1048	COVID-19	1	Number	2021	14968.8	20283.8	10112.2
1	Deaths	47	Czechia	2	Female	22	All ages	1048	COVID-19	1	Number	2021	10507.5	14306.3	7064.95
1	Deaths	47	Czechia	3	Both	22	All ages	1048	COVID-19	1	Number	2021	25476.2	34589.8	17156.9
1	Deaths	180	Kenya	1	Male	22	All ages	1048	COVID-19	1	Number	2021	39299.5	43036.4	35193.5
1	Deaths	180	Kenya	2	Female	22	All ages	1048	COVID-19	1	Number	2021	22846.6	25009.4	20424.4
1	Deaths	180	Kenya	3	Both	22	All ages	1048	COVID-19	1	Number	2021	62146.1	68046.8	55627
1	Deaths	15	Myanmar	1	Male	22	All ages	1048	COVID-19	1	Number	2021	25273.5	50959.8	9773.35
1	Deaths	15	Myanmar	2	Female	22	All ages	1048	COVID-19	1	Number	2021	17580.1	35452.3	6799.41
1	Deaths	15	Myanmar	3	Both	22	All ages	1048	COVID-19	1	Number	2021	42853.6	86411.8	16569.7
1	Deaths	80	France	1	Male	22	All ages	1048	COVID-19	1	Number	2021	35708.5	37135	34376.9
1	Deaths	80	France	2	Female	22	All ages	1048	COVID-19	1	Number	2021	29309.7	30235.2	28335.9
1	Deaths	80	France	3	Both	22	All ages	1048	COVID-19	1	Number	2021	65018.2	67272.1	62887.3
1	Deaths	127	El Salvador	1	Male	22	All ages	1048	COVID-19	1	Number	2021	4587.29	5343.64	3815.47
1	Deaths	127	El Salvador	2	Female	22	All ages	1048	COVID-19	1	Number	2021	3531.56	4113.76	2936.91
1	Deaths	127	El Salvador	3	Both	22	All ages	1048	COVID-19	1	Number	2021	8118.85	9457.36	6752.69
1	Deaths	179	Ethiopia	1	Male	22	All ages	1048	COVID-19	1	Number	2021	76469.3	82924.7	69929.8
1	Deaths	179	Ethiopia	2	Female	22	All ages	1048	COVID-19	1	Number	2021	36843.7	39970.6	33687.4
1	Deaths	179	Ethiopia	3	Both	22	All ages	1048	COVID-19	1	Number	2021	113313	122892	103617
1	Deaths	49	North Macedonia	1	Male	22	All ages	1048	COVID-19	1	Number	2021	4960.19	5854.06	3649.14
1	Deaths	49	North Macedonia	2	Female	22	All ages	1048	COVID-19	1	Number	2021	2788.79	3291.38	2051.38
1	Deaths	49	North Macedonia	3	Both	22	All ages	1048	COVID-19	1	Number	2021	7748.98	9145.53	5700.52
1	Deaths	25	Micronesia (Federated States of)	1	Male	22	All ages	1048	COVID-19	1	Number	2021	2.5e-09	2.5e-09	2.5e-09
1	Deaths	25	Micronesia (Federated States of)	2	Female	22	All ages	1048	COVID-19	1	Number	2021	2.5e-09	2.5e-09	2.5e-09
1	Deaths	25	Micronesia (Federated States of)	3	Both	22	All ages	1048	COVID-19	1	Number	2021	5e-09	5e-09	5e-09
1	Deaths	200	Benin	1	Male	22	All ages	1048	COVID-19	1	Number	2021	5776.87	6389.83	5155.91
1	Deaths	200	Benin	2	Female	22	All ages	1048	COVID-19	1	Number	2021	3495.31	3870.49	3118.96
1	Deaths	200	Benin	3	Both	22	All ages	1048	COVID-19	1	Number	2021	9272.18	10259.7	8274.59
1	Deaths	20	Viet Nam	1	Male	22	All ages	1048	COVID-19	1	Number	2021	20895.3	33585.3	18475.5
1	Deaths	20	Viet Nam	2	Female	22	All ages	1048	COVID-19	1	Number	2021	15501.9	24915.4	13702.6
1	Deaths	20	Viet Nam	3	Both	22	All ages	1048	COVID-19	1	Number	2021	36397.2	58500.7	32182.2
1	Deaths	367	Monaco	1	Male	22	All ages	1048	COVID-19	1	Number	2021	36.6107	49.5524	23.1301
1	Deaths	367	Monaco	2	Female	22	All ages	1048	COVID-19	1	Number	2021	26.8359	36.3229	16.9551
1	Deaths	367	Monaco	3	Both	22	All ages	1048	COVID-19	1	Number	2021	63.4466	85.8753	40.0853
1	Deaths	86	Italy	1	Male	22	All ages	1048	COVID-19	1	Number	2021	35290.2	37311.4	33329.5
1	Deaths	86	Italy	2	Female	22	All ages	1048	COVID-19	1	Number	2021	28224.7	29976.7	26676.2
1	Deaths	86	Italy	3	Both	22	All ages	1048	COVID-19	1	Number	2021	63514.9	66968.7	60402.2
1	Deaths	212	Mauritania	1	Male	22	All ages	1048	COVID-19	1	Number	2021	1539.65	1930.38	1053.68
1	Deaths	212	Mauritania	2	Female	22	All ages	1048	COVID-19	1	Number	2021	779.571	975.492	533.294
1	Deaths	212	Mauritania	3	Both	22	All ages	1048	COVID-19	1	Number	2021	2319.23	2907.25	1587.04
1	Deaths	107	Barbados	1	Male	22	All ages	1048	COVID-19	1	Number	2021	168.672	168.785	168.66
1	Deaths	107	Barbados	2	Female	22	All ages	1048	COVID-19	1	Number	2021	118.633	118.728	118.623
1	Deaths	107	Barbados	3	Both	22	All ages	1048	COVID-19	1	Number	2021	287.305	287.519	287.282
1	Deaths	213	Niger	1	Male	22	All ages	1048	COVID-19	1	Number	2021	8040.18	9557.39	6078.65
1	Deaths	213	Niger	2	Female	22	All ages	1048	COVID-19	1	Number	2021	4266.05	5072.34	3226.25
1	Deaths	213	Niger	3	Both	22	All ages	1048	COVID-19	1	Number	2021	12306.2	14629.8	9304.91
1	Deaths	119	Trinidad and Tobago	1	Male	22	All ages	1048	COVID-19	1	Number	2021	2017.12	3195	1688.28
1	Deaths	119	Trinidad and Tobago	2	Female	22	All ages	1048	COVID-19	1	Number	2021	1256.07	1989.45	1051.09
1	Deaths	119	Trinidad and Tobago	3	Both	22	All ages	1048	COVID-19	1	Number	2021	3273.2	5184.46	2739.44
1	Deaths	98	Chile	1	Male	22	All ages	1048	COVID-19	1	Number	2021	16624.7	17404.9	15818.2
1	Deaths	98	Chile	2	Female	22	All ages	1048	COVID-19	1	Number	2021	11391.7	11906	10934
1	Deaths	98	Chile	3	Both	22	All ages	1048	COVID-19	1	Number	2021	28016.4	29108.1	26929.3
1	Deaths	61	Republic of Moldova	1	Male	22	All ages	1048	COVID-19	1	Number	2021	4272.99	4478.31	4131.51
1	Deaths	61	Republic of Moldova	2	Female	22	All ages	1048	COVID-19	1	Number	2021	3710.94	3889.53	3588.22
1	Deaths	61	Republic of Moldova	3	Both	22	All ages	1048	COVID-19	1	Number	2021	7983.93	8367.84	7719.74
1	Deaths	46	Croatia	1	Male	22	All ages	1048	COVID-19	1	Number	2021	4780.95	6556.19	3087.77
1	Deaths	46	Croatia	2	Female	22	All ages	1048	COVID-19	1	Number	2021	3902.17	5232.31	2624.01
1	Deaths	46	Croatia	3	Both	22	All ages	1048	COVID-19	1	Number	2021	8683.11	11778.9	5683.07
1	Deaths	163	India	1	Male	22	All ages	1048	COVID-19	1	Number	2021	1.07427e+06	1.11956e+06	1.01971e+06
1	Deaths	163	India	2	Female	22	All ages	1048	COVID-19	1	Number	2021	592055	616932	562256
1	Deaths	163	India	3	Both	22	All ages	1048	COVID-19	1	Number	2021	1.66633e+06	1.73649e+06	1.58203e+06
1	Deaths	18	Thailand	1	Male	22	All ages	1048	COVID-19	1	Number	2021	24855.6	48952.5	12963.3
1	Deaths	18	Thailand	2	Female	22	All ages	1048	COVID-19	1	Number	2021	16564.4	32622.3	8639.31
1	Deaths	18	Thailand	3	Both	22	All ages	1048	COVID-19	1	Number	2021	41420	81574.8	21603.5
1	Deaths	131	Nicaragua	1	Male	22	All ages	1048	COVID-19	1	Number	2021	7678.6	8304.19	7215.01
1	Deaths	131	Nicaragua	2	Female	22	All ages	1048	COVID-19	1	Number	2021	4960.63	5365.06	4660.82
1	Deaths	131	Nicaragua	3	Both	22	All ages	1048	COVID-19	1	Number	2021	12639.2	13670.5	11876
1	Deaths	183	Mauritius	1	Male	22	All ages	1048	COVID-19	1	Number	2021	653.086	1062.52	446.479
1	Deaths	183	Mauritius	2	Female	22	All ages	1048	COVID-19	1	Number	2021	443.652	721.815	303.235
1	Deaths	183	Mauritius	3	Both	22	All ages	1048	COVID-19	1	Number	2021	1096.74	1784.36	749.797
1	Deaths	53	Serbia	1	Male	22	All ages	1048	COVID-19	1	Number	2021	11271	18307.2	4770.31
1	Deaths	53	Serbia	2	Female	22	All ages	1048	COVID-19	1	Number	2021	8411.04	13890.5	3655.72
1	Deaths	53	Serbia	3	Both	22	All ages	1048	COVID-19	1	Number	2021	19682	31903.9	8426.57
1	Deaths	62	Russian Federation	1	Male	22	All ages	1048	COVID-19	1	Number	2021	239251	304797	181324
1	Deaths	62	Russian Federation	2	Female	22	All ages	1048	COVID-19	1	Number	2021	278725	340741	224944
1	Deaths	62	Russian Federation	3	Both	22	All ages	1048	COVID-19	1	Number	2021	517976	605240	433441
1	Deaths	52	Romania	1	Male	22	All ages	1048	COVID-19	1	Number	2021	29779.2	42838.9	18755.9
1	Deaths	52	Romania	2	Female	22	All ages	1048	COVID-19	1	Number	2021	24412.8	34742	15435.4
1	Deaths	52	Romania	3	Both	22	All ages	1048	COVID-19	1	Number	2021	54192	77334.8	34240.4
1	Deaths	164	Nepal	1	Male	22	All ages	1048	COVID-19	1	Number	2021	28508.6	32259	26749.4
1	Deaths	164	Nepal	2	Female	22	All ages	1048	COVID-19	1	Number	2021	16176.8	18304.1	15183.1
1	Deaths	164	Nepal	3	Both	22	All ages	1048	COVID-19	1	Number	2021	44685.5	50561.6	41931
1	Deaths	184	Mozambique	1	Male	22	All ages	1048	COVID-19	1	Number	2021	23862.7	28240.9	18442.2
1	Deaths	184	Mozambique	2	Female	22	All ages	1048	COVID-19	1	Number	2021	15541.7	18378	12009.4
1	Deaths	184	Mozambique	3	Both	22	All ages	1048	COVID-19	1	Number	2021	39404.4	46617.4	30444.7
1	Deaths	197	Eswatini	1	Male	22	All ages	1048	COVID-19	1	Number	2021	2536.85	3099.42	1774.94
1	Deaths	197	Eswatini	2	Female	22	All ages	1048	COVID-19	1	Number	2021	1885.59	2303.23	1320.94
1	Deaths	197	Eswatini	3	Both	22	All ages	1048	COVID-19	1	Number	2021	4422.44	5402.57	3095.24
1	Deaths	132	Panama	1	Male	22	All ages	1048	COVID-19	1	Number	2021	2141.4	2464.91	2119.63
1	Deaths	132	Panama	2	Female	22	All ages	1048	COVID-19	1	Number	2021	1294.57	1491.18	1281.11
1	Deaths	132	Panama	3	Both	22	All ages	1048	COVID-19	1	Number	2021	3435.97	3956.08	3400.98
1	Deaths	85	Israel	1	Male	22	All ages	1048	COVID-19	1	Number	2021	2892.46	2892.64	2891.78
1	Deaths	85	Israel	2	Female	22	All ages	1048	COVID-19	1	Number	2021	2025.54	2026.03	2025.12
1	Deaths	85	Israel	3	Both	22	All ages	1048	COVID-19	1	Number	2021	4918	4918.67	4916.91
1	Deaths	217	Sierra Leone	1	Male	22	All ages	1048	COVID-19	1	Number	2021	2889.57	3432.45	2409.15
1	Deaths	217	Sierra Leone	2	Female	22	All ages	1048	COVID-19	1	Number	2021	1487.46	1768.6	1238.54
1	Deaths	217	Sierra Leone	3	Both	22	All ages	1048	COVID-19	1	Number	2021	4377.02	5200.1	3648.09
1	Deaths	385	Puerto Rico	1	Male	22	All ages	1048	COVID-19	1	Number	2021	1149.86	1950.47	1012.56
1	Deaths	385	Puerto Rico	2	Female	22	All ages	1048	COVID-19	1	Number	2021	904.504	1534.27	796.531
1	Deaths	385	Puerto Rico	3	Both	22	All ages	1048	COVID-19	1	Number	2021	2054.36	3484.73	1809.18
1	Deaths	19	Timor-Leste	1	Male	22	All ages	1048	COVID-19	1	Number	2021	491.854	966.81	172.276
1	Deaths	19	Timor-Leste	2	Female	22	All ages	1048	COVID-19	1	Number	2021	258.527	508.253	90.5716
1	Deaths	19	Timor-Leste	3	Both	22	All ages	1048	COVID-19	1	Number	2021	750.381	1475.06	262.846
1	Deaths	140	Bahrain	1	Male	22	All ages	1048	COVID-19	1	Number	2021	1100.62	1275.88	891.464
1	Deaths	140	Bahrain	2	Female	22	All ages	1048	COVID-19	1	Number	2021	336.886	390.266	272.629
1	Deaths	140	Bahrain	3	Both	22	All ages	1048	COVID-19	1	Number	2021	1437.5	1666.15	1164.09
1	Deaths	102	United States of America	1	Male	22	All ages	1048	COVID-19	1	Number	2021	271826	278143	266688
1	Deaths	102	United States of America	2	Female	22	All ages	1048	COVID-19	1	Number	2021	211685	216591	207714
1	Deaths	102	United States of America	3	Both	22	All ages	1048	COVID-19	1	Number	2021	483510	494812	474400
1	Deaths	66	Brunei Darussalam	1	Male	22	All ages	1048	COVID-19	1	Number	2021	64.0166	83.8819	61.5266
1	Deaths	66	Brunei Darussalam	2	Female	22	All ages	1048	COVID-19	1	Number	2021	34.8064	45.6037	33.44
1	Deaths	66	Brunei Darussalam	3	Both	22	All ages	1048	COVID-19	1	Number	2021	98.823	129.485	94.9729
1	Deaths	37	Kyrgyzstan	1	Male	22	All ages	1048	COVID-19	1	Number	2021	2621.54	3598.31	1784.63
1	Deaths	37	Kyrgyzstan	2	Female	22	All ages	1048	COVID-19	1	Number	2021	1919.8	2635.15	1306.12
1	Deaths	37	Kyrgyzstan	3	Both	22	All ages	1048	COVID-19	1	Number	2021	4541.34	6233.46	3090.66
1	Deaths	139	Algeria	1	Male	22	All ages	1048	COVID-19	1	Number	2021	38855.5	46677.2	30250.6
1	Deaths	139	Algeria	2	Female	22	All ages	1048	COVID-19	1	Number	2021	17986.1	21612.8	14005.3
1	Deaths	139	Algeria	3	Both	22	All ages	1048	COVID-19	1	Number	2021	56841.6	68290	44256.1
1	Deaths	135	Brazil	1	Male	22	All ages	1048	COVID-19	1	Number	2021	249440	272069	226379
1	Deaths	135	Brazil	2	Female	22	All ages	1048	COVID-19	1	Number	2021	174078	192501	157235
1	Deaths	135	Brazil	3	Both	22	All ages	1048	COVID-19	1	Number	2021	423518	452094	395281
1	Deaths	136	Paraguay	1	Male	22	All ages	1048	COVID-19	1	Number	2021	8810.32	8816.51	8802.32
1	Deaths	136	Paraguay	2	Female	22	All ages	1048	COVID-19	1	Number	2021	5481.68	5486.75	5475.66
1	Deaths	136	Paraguay	3	Both	22	All ages	1048	COVID-19	1	Number	2021	14292	14302.9	14277.5
1	Deaths	51	Poland	1	Male	22	All ages	1048	COVID-19	1	Number	2021	44838.3	62760.8	30527.3
1	Deaths	51	Poland	2	Female	22	All ages	1048	COVID-19	1	Number	2021	38946.4	55007.3	26888.7
1	Deaths	51	Poland	3	Both	22	All ages	1048	COVID-19	1	Number	2021	83784.7	111310	61371.7
1	Deaths	416	Tuvalu	1	Male	22	All ages	1048	COVID-19	1	Number	2021	2.5e-09	2.5e-09	2.5e-09
1	Deaths	416	Tuvalu	2	Female	22	All ages	1048	COVID-19	1	Number	2021	2.5e-09	2.5e-09	2.5e-09
1	Deaths	416	Tuvalu	3	Both	22	All ages	1048	COVID-19	1	Number	2021	5e-09	5e-09	5e-09
1	Deaths	168	Angola	1	Male	22	All ages	1048	COVID-19	1	Number	2021	18171.7	22931.7	13335.5
1	Deaths	168	Angola	2	Female	22	All ages	1048	COVID-19	1	Number	2021	11102	14038.6	8140.28
1	Deaths	168	Angola	3	Both	22	All ages	1048	COVID-19	1	Number	2021	29273.8	36970.3	21465.4
1	Deaths	106	Bahamas	1	Male	22	All ages	1048	COVID-19	1	Number	2021	537.968	649.077	382.265
1	Deaths	106	Bahamas	2	Female	22	All ages	1048	COVID-19	1	Number	2021	352.371	425.189	250.372
1	Deaths	106	Bahamas	3	Both	22	All ages	1048	COVID-19	1	Number	2021	890.339	1074.27	632.636
1	Deaths	422	United States Virgin Islands	1	Male	22	All ages	1048	COVID-19	1	Number	2021	73.592	149.167	39.515
1	Deaths	422	United States Virgin Islands	2	Female	22	All ages	1048	COVID-19	1	Number	2021	49.3	99.9252	26.4684
1	Deaths	422	United States Virgin Islands	3	Both	22	All ages	1048	COVID-19	1	Number	2021	122.892	249.092	65.9847
1	Deaths	202	Cameroon	1	Male	22	All ages	1048	COVID-19	1	Number	2021	21233.8	24017.7	18600.2
1	Deaths	202	Cameroon	2	Female	22	All ages	1048	COVID-19	1	Number	2021	11650	13167.4	10184
1	Deaths	202	Cameroon	3	Both	22	All ages	1048	COVID-19	1	Number	2021	32883.8	37187.5	28784.3
1	Deaths	204	Chad	1	Male	22	All ages	1048	COVID-19	1	Number	2021	6134.58	7301.7	4468.01
1	Deaths	204	Chad	2	Female	22	All ages	1048	COVID-19	1	Number	2021	2755.53	3281.65	2008.29
1	Deaths	204	Chad	3	Both	22	All ages	1048	COVID-19	1	Number	2021	8890.11	10583.8	6476.29
1	Deaths	24	Marshall Islands	1	Male	22	All ages	1048	COVID-19	1	Number	2021	2.5e-09	2.5e-09	2.5e-09
1	Deaths	24	Marshall Islands	2	Female	22	All ages	1048	COVID-19	1	Number	2021	2.5e-09	2.5e-09	2.5e-09
1	Deaths	24	Marshall Islands	3	Both	22	All ages	1048	COVID-19	1	Number	2021	5e-09	5e-09	5e-09
1	Deaths	90	Norway	1	Male	22	All ages	1048	COVID-19	1	Number	2021	459.5	552.983	392.952
1	Deaths	90	Norway	2	Female	22	All ages	1048	COVID-19	1	Number	2021	409.17	484.311	354.706
1	Deaths	90	Norway	3	Both	22	All ages	1048	COVID-19	1	Number	2021	868.67	1024.15	760
1	Deaths	173	Gabon	1	Male	22	All ages	1048	COVID-19	1	Number	2021	1362	1618.09	1009.8
1	Deaths	173	Gabon	2	Female	22	All ages	1048	COVID-19	1	Number	2021	806.191	956.79	597.7
1	Deaths	173	Gabon	3	Both	22	All ages	1048	COVID-19	1	Number	2021	2168.19	2574.92	1607.42
1	Deaths	189	United Republic of Tanzania	1	Male	22	All ages	1048	COVID-19	1	Number	2021	40768.8	43783.4	36495.5
1	Deaths	189	United Republic of Tanzania	2	Female	22	All ages	1048	COVID-19	1	Number	2021	23287.7	25026.3	20851.5
1	Deaths	189	United Republic of Tanzania	3	Both	22	All ages	1048	COVID-19	1	Number	2021	64056.4	68848.9	57396.7
1	Deaths	108	Belize	1	Male	22	All ages	1048	COVID-19	1	Number	2021	240.864	282.533	232.089
1	Deaths	108	Belize	2	Female	22	All ages	1048	COVID-19	1	Number	2021	125.596	147.359	120.965
1	Deaths	108	Belize	3	Both	22	All ages	1048	COVID-19	1	Number	2021	366.46	429.89	353.061
1	Deaths	209	Guinea-Bissau	1	Male	22	All ages	1048	COVID-19	1	Number	2021	1182.74	1675.72	631.95
1	Deaths	209	Guinea-Bissau	2	Female	22	All ages	1048	COVID-19	1	Number	2021	707.273	1001.13	378.849
1	Deaths	209	Guinea-Bissau	3	Both	22	All ages	1048	COVID-19	1	Number	2021	1890.01	2676.85	1010.78
1	Deaths	29	Tonga	1	Male	22	All ages	1048	COVID-19	1	Number	2021	2.5e-09	2.5e-09	2.5e-09
1	Deaths	29	Tonga	2	Female	22	All ages	1048	COVID-19	1	Number	2021	2.5e-09	2.5e-09	2.5e-09
1	Deaths	29	Tonga	3	Both	22	All ages	1048	COVID-19	1	Number	2021	5e-09	5e-09	5e-09
1	Deaths	214	Nigeria	1	Male	22	All ages	1048	COVID-19	1	Number	2021	84204.9	95000.3	75349.1
1	Deaths	214	Nigeria	2	Female	22	All ages	1048	COVID-19	1	Number	2021	46279.8	52143.9	41492.5
1	Deaths	214	Nigeria	3	Both	22	All ages	1048	COVID-19	1	Number	2021	130485	147169	116807
1	Deaths	33	Armenia	1	Male	22	All ages	1048	COVID-19	1	Number	2021	2953.63	2954.19	2952.44
1	Deaths	33	Armenia	2	Female	22	All ages	1048	COVID-19	1	Number	2021	2195.23	2195.65	2194.35
1	Deaths	33	Armenia	3	Both	22	All ages	1048	COVID-19	1	Number	2021	5148.86	5149.78	5146.87
1	Deaths	172	Equatorial Guinea	1	Male	22	All ages	1048	COVID-19	1	Number	2021	738.673	1078.09	401.479
1	Deaths	172	Equatorial Guinea	2	Female	22	All ages	1048	COVID-19	1	Number	2021	460.143	670.742	250.405
1	Deaths	172	Equatorial Guinea	3	Both	22	All ages	1048	COVID-19	1	Number	2021	1198.82	1748.83	651.893
1	Deaths	218	Togo	1	Male	22	All ages	1048	COVID-19	1	Number	2021	3458.26	4016.56	2555.04
1	Deaths	218	Togo	2	Female	22	All ages	1048	COVID-19	1	Number	2021	2296.06	2664.99	1693.89
1	Deaths	218	Togo	3	Both	22	All ages	1048	COVID-19	1	Number	2021	5754.32	6682.23	4248.93
1	Deaths	125	Colombia	1	Male	22	All ages	1048	COVID-19	1	Number	2021	52476	57886.8	51577.7
1	Deaths	125	Colombia	2	Female	22	All ages	1048	COVID-19	1	Number	2021	35664.9	39347.5	35051.9
1	Deaths	125	Colombia	3	Both	22	All ages	1048	COVID-19	1	Number	2021	88140.9	97234.3	86630.8
1	Deaths	58	Estonia	1	Male	22	All ages	1048	COVID-19	1	Number	2021	1365.25	2018.46	792.002
1	Deaths	58	Estonia	2	Female	22	All ages	1048	COVID-19	1	Number	2021	1247.56	1901.5	712.309
1	Deaths	58	Estonia	3	Both	22	All ages	1048	COVID-19	1	Number	2021	2612.81	3875.75	1502.97
1	Deaths	141	Egypt	1	Male	22	All ages	1048	COVID-19	1	Number	2021	78971.9	102289	52410.1
1	Deaths	141	Egypt	2	Female	22	All ages	1048	COVID-19	1	Number	2021	30848.8	39908.8	20435.8
1	Deaths	141	Egypt	3	Both	22	All ages	1048	COVID-19	1	Number	2021	109821	142197	72849.5
1	Deaths	91	Portugal	1	Male	22	All ages	1048	COVID-19	1	Number	2021	6822.24	7154.99	6506.14
1	Deaths	91	Portugal	2	Female	22	All ages	1048	COVID-19	1	Number	2021	5226.75	5460.14	5012.51
1	Deaths	91	Portugal	3	Both	22	All ages	1048	COVID-19	1	Number	2021	12049	12530.7	11582.1
1	Deaths	155	Turkey	1	Male	22	All ages	1048	COVID-19	1	Number	2021	69139.1	81096.4	52700.7
1	Deaths	155	Turkey	2	Female	22	All ages	1048	COVID-19	1	Number	2021	42546.2	49903.8	32426
1	Deaths	155	Turkey	3	Both	22	All ages	1048	COVID-19	1	Number	2021	111685	131000	85126.2
1	Deaths	156	United Arab Emirates	1	Male	22	All ages	1048	COVID-19	1	Number	2021	2654.06	3588.43	1314.96
1	Deaths	156	United Arab Emirates	2	Female	22	All ages	1048	COVID-19	1	Number	2021	363.068	490.355	179.794
1	Deaths	156	United Arab Emirates	3	Both	22	All ages	1048	COVID-19	1	Number	2021	3017.12	4078.79	1494.76
1	Deaths	142	Iran (Islamic Republic of)	1	Male	22	All ages	1048	COVID-19	1	Number	2021	108297	114141	103909
1	Deaths	142	Iran (Islamic Republic of)	2	Female	22	All ages	1048	COVID-19	1	Number	2021	53048.2	55810	50939.8
1	Deaths	142	Iran (Islamic Republic of)	3	Both	22	All ages	1048	COVID-19	1	Number	2021	161345	169951	154849
1	Deaths	320	Cook Islands	1	Male	22	All ages	1048	COVID-19	1	Number	2021	2.5e-09	2.5e-09	2.5e-09
1	Deaths	320	Cook Islands	2	Female	22	All ages	1048	COVID-19	1	Number	2021	2.5e-09	2.5e-09	2.5e-09
1	Deaths	320	Cook Islands	3	Both	22	All ages	1048	COVID-19	1	Number	2021	5e-09	5e-09	5e-09
1	Deaths	78	Denmark	1	Male	22	All ages	1048	COVID-19	1	Number	2021	1107.68	1348.59	986.454
1	Deaths	78	Denmark	2	Female	22	All ages	1048	COVID-19	1	Number	2021	882.032	1076.57	784.963
1	Deaths	78	Denmark	3	Both	22	All ages	1048	COVID-19	1	Number	2021	1989.71	2419.11	1778.81
1	Deaths	160	Afghanistan	1	Male	22	All ages	1048	COVID-19	1	Number	2021	23332.3	27423	18262.5
1	Deaths	160	Afghanistan	2	Female	22	All ages	1048	COVID-19	1	Number	2021	12680	14861.9	9925.94
1	Deaths	160	Afghanistan	3	Both	22	All ages	1048	COVID-19	1	Number	2021	36012.3	42278.3	28188.4
1	Deaths	45	Bulgaria	1	Male	22	All ages	1048	COVID-19	1	Number	2021	20191.2	26633.6	13666.8
1	Deaths	45	Bulgaria	2	Female	22	All ages	1048	COVID-19	1	Number	2021	16742.5	21992.1	11397.1
1	Deaths	45	Bulgaria	3	Both	22	All ages	1048	COVID-19	1	Number	2021	36933.7	48568.4	24669.3
1	Deaths	165	Pakistan	1	Male	22	All ages	1048	COVID-19	1	Number	2021	151276	185721	128499
1	Deaths	165	Pakistan	2	Female	22	All ages	1048	COVID-19	1	Number	2021	68798.8	84015.5	58378.2
1	Deaths	165	Pakistan	3	Both	22	All ages	1048	COVID-19	1	Number	2021	220075	269736	186838
1	Deaths	79	Finland	1	Male	22	All ages	1048	COVID-19	1	Number	2021	987.348	1277.86	681.433
1	Deaths	79	Finland	2	Female	22	All ages	1048	COVID-19	1	Number	2021	762.567	983.906	519.281
1	Deaths	79	Finland	3	Both	22	All ages	1048	COVID-19	1	Number	2021	1749.91	2254.39	1196.78
1	Deaths	128	Guatemala	1	Male	22	All ages	1048	COVID-19	1	Number	2021	14951.9	17451.2	12396.9
1	Deaths	128	Guatemala	2	Female	22	All ages	1048	COVID-19	1	Number	2021	8889.6	10376.5	7367.82
1	Deaths	128	Guatemala	3	Both	22	All ages	1048	COVID-19	1	Number	2021	23841.5	27827.7	19764.7
1	Deaths	298	American Samoa	1	Male	22	All ages	1048	COVID-19	1	Number	2021	2.5e-09	2.5e-09	2.5e-09
1	Deaths	298	American Samoa	2	Female	22	All ages	1048	COVID-19	1	Number	2021	2.5e-09	2.5e-09	2.5e-09
1	Deaths	298	American Samoa	3	Both	22	All ages	1048	COVID-19	1	Number	2021	5e-09	5e-09	5e-09
1	Deaths	349	Greenland	1	Male	22	All ages	1048	COVID-19	1	Number	2021	16.153	26.6884	0.682574
1	Deaths	349	Greenland	2	Female	22	All ages	1048	COVID-19	1	Number	2021	8.98465	14.8087	0.363008
1	Deaths	349	Greenland	3	Both	22	All ages	1048	COVID-19	1	Number	2021	25.1377	41.4248	1.03585
1	Deaths	374	Niue	1	Male	22	All ages	1048	COVID-19	1	Number	2021	2.5e-09	2.5e-09	2.5e-09
1	Deaths	374	Niue	2	Female	22	All ages	1048	COVID-19	1	Number	2021	2.5e-09	2.5e-09	2.5e-09
1	Deaths	374	Niue	3	Both	22	All ages	1048	COVID-19	1	Number	2021	5e-09	5e-09	5e-09
1	Deaths	30	Vanuatu	1	Male	22	All ages	1048	COVID-19	1	Number	2021	100.648	203.308	23.2897
1	Deaths	30	Vanuatu	2	Female	22	All ages	1048	COVID-19	1	Number	2021	52.184	105.25	12.1256
1	Deaths	30	Vanuatu	3	Both	22	All ages	1048	COVID-19	1	Number	2021	152.832	308.558	35.4153
1	Deaths	112	Grenada	1	Male	22	All ages	1048	COVID-19	1	Number	2021	134.86	210.447	117.226
1	Deaths	112	Grenada	2	Female	22	All ages	1048	COVID-19	1	Number	2021	94.9425	148.201	82.5033
1	Deaths	112	Grenada	3	Both	22	All ages	1048	COVID-19	1	Number	2021	229.802	358.655	199.729
1	Deaths	376	Northern Mariana Islands	1	Male	22	All ages	1048	COVID-19	1	Number	2021	19.5677	39.8987	7.48337
1	Deaths	376	Northern Mariana Islands	2	Female	22	All ages	1048	COVID-19	1	Number	2021	9.1031	18.5622	3.47758
1	Deaths	376	Northern Mariana Islands	3	Both	22	All ages	1048	COVID-19	1	Number	2021	28.6708	58.4608	10.9666
1	Deaths	369	Nauru	1	Male	22	All ages	1048	COVID-19	1	Number	2021	2.5e-09	2.5e-09	2.5e-09
1	Deaths	369	Nauru	2	Female	22	All ages	1048	COVID-19	1	Number	2021	2.5e-09	2.5e-09	2.5e-09
1	Deaths	369	Nauru	3	Both	22	All ages	1048	COVID-19	1	Number	2021	5e-09	5e-09	5e-09
1	Deaths	393	Saint Kitts and Nevis	1	Male	22	All ages	1048	COVID-19	1	Number	2021	40.3589	52.9866	27.681
1	Deaths	393	Saint Kitts and Nevis	2	Female	22	All ages	1048	COVID-19	1	Number	2021	25.4148	33.3708	17.4275
1	Deaths	393	Saint Kitts and Nevis	3	Both	22	All ages	1048	COVID-19	1	Number	2021	65.7736	86.3574	45.1073
1	Deaths	143	Iraq	1	Male	22	All ages	1048	COVID-19	1	Number	2021	23779.9	29966.7	16969.6
1	Deaths	143	Iraq	2	Female	22	All ages	1048	COVID-19	1	Number	2021	12497.9	15729.9	8921.18
1	Deaths	143	Iraq	3	Both	22	All ages	1048	COVID-19	1	Number	2021	36277.7	45696.6	25890.9
1	Deaths	145	Kuwait	1	Male	22	All ages	1048	COVID-19	1	Number	2021	1207.7	1535.32	1111.77
1	Deaths	145	Kuwait	2	Female	22	All ages	1048	COVID-19	1	Number	2021	457.864	581.817	421.091
1	Deaths	145	Kuwait	3	Both	22	All ages	1048	COVID-19	1	Number	2021	1665.57	2117.13	1532.87
1	Deaths	207	Ghana	1	Male	22	All ages	1048	COVID-19	1	Number	2021	17699.7	21306.1	14242.9
1	Deaths	207	Ghana	2	Female	22	All ages	1048	COVID-19	1	Number	2021	11336.9	13654.4	9131.65
1	Deaths	207	Ghana	3	Both	22	All ages	1048	COVID-19	1	Number	2021	29036.6	34960.9	23373
1	Deaths	305	Bermuda	1	Male	22	All ages	1048	COVID-19	1	Number	2021	72.9285	90.4026	56.7633
1	Deaths	305	Bermuda	2	Female	22	All ages	1048	COVID-19	1	Number	2021	55.506	68.8074	43.2014
1	Deaths	305	Bermuda	3	Both	22	All ages	1048	COVID-19	1	Number	2021	128.434	159.21	99.9665
1	Deaths	94	Switzerland	1	Male	22	All ages	1048	COVID-19	1	Number	2021	2452.74	2582.65	2307.43
1	Deaths	94	Switzerland	2	Female	22	All ages	1048	COVID-19	1	Number	2021	1928.94	2015.97	1839.27
1	Deaths	94	Switzerland	3	Both	22	All ages	1048	COVID-19	1	Number	2021	4381.68	4564.64	4167.66
1	Deaths	177	Djibouti	1	Male	22	All ages	1048	COVID-19	1	Number	2021	942.194	1258.09	627.667
1	Deaths	177	Djibouti	2	Female	22	All ages	1048	COVID-19	1	Number	2021	403.103	538.106	268.843
1	Deaths	177	Djibouti	3	Both	22	All ages	1048	COVID-19	1	Number	2021	1345.3	1796.2	896.512
1	Deaths	194	Lesotho	1	Male	22	All ages	1048	COVID-19	1	Number	2021	4506.88	5278.93	3647.1
1	Deaths	194	Lesotho	2	Female	22	All ages	1048	COVID-19	1	Number	2021	3688.13	4320.93	2985.98
1	Deaths	194	Lesotho	3	Both	22	All ages	1048	COVID-19	1	Number	2021	8195.02	9598.13	6632.76
1	Deaths	113	Guyana	1	Male	22	All ages	1048	COVID-19	1	Number	2021	1040.48	1851.44	558.964
1	Deaths	113	Guyana	2	Female	22	All ages	1048	COVID-19	1	Number	2021	613.663	1092.47	329.461
1	Deaths	113	Guyana	3	Both	22	All ages	1048	COVID-19	1	Number	2021	1654.15	2943.9	888.621
1	Deaths	111	Dominican Republic	1	Male	22	All ages	1048	COVID-19	1	Number	2021	3694.36	8486.26	876.564
1	Deaths	111	Dominican Republic	2	Female	22	All ages	1048	COVID-19	1	Number	2021	2081.04	4852.02	491.781
1	Deaths	111	Dominican Republic	3	Both	22	All ages	1048	COVID-19	1	Number	2021	5775.4	13177.1	1420.43
1	Deaths	146	Lebanon	1	Male	22	All ages	1048	COVID-19	1	Number	2021	8402.55	9088.73	7797.48
1	Deaths	146	Lebanon	2	Female	22	All ages	1048	COVID-19	1	Number	2021	5184.19	5606.68	4810.98
1	Deaths	146	Lebanon	3	Both	22	All ages	1048	COVID-19	1	Number	2021	13586.7	14695.4	12608.3
1	Deaths	63	Ukraine	1	Male	22	All ages	1048	COVID-19	1	Number	2021	52179.9	65194.6	43141.4
1	Deaths	63	Ukraine	2	Female	22	All ages	1048	COVID-19	1	Number	2021	50218.4	62740.6	41542.7
1	Deaths	63	Ukraine	3	Both	22	All ages	1048	COVID-19	1	Number	2021	102398	127935	84684
1	Deaths	176	Comoros	1	Male	22	All ages	1048	COVID-19	1	Number	2021	435.247	468.973	395.606
1	Deaths	176	Comoros	2	Female	22	All ages	1048	COVID-19	1	Number	2021	256.221	276.21	232.701
1	Deaths	176	Comoros	3	Both	22	All ages	1048	COVID-19	1	Number	2021	691.467	745.183	628.31
1	Deaths	157	Yemen	1	Male	22	All ages	1048	COVID-19	1	Number	2021	16819.5	26235.6	7314.37
1	Deaths	157	Yemen	2	Female	22	All ages	1048	COVID-19	1	Number	2021	8697.62	13545.1	3783.84
1	Deaths	157	Yemen	3	Both	22	All ages	1048	COVID-19	1	Number	2021	25517.1	39780.6	11100.1
1	Deaths	95	United Kingdom	1	Male	22	All ages	1048	COVID-19	1	Number	2021	56082	60453.8	51882.3
1	Deaths	95	United Kingdom	2	Female	22	All ages	1048	COVID-19	1	Number	2021	41849.1	45135.1	38562.4
1	Deaths	95	United Kingdom	3	Both	22	All ages	1048	COVID-19	1	Number	2021	97931.1	104595	91829
1	Deaths	147	Libya	1	Male	22	All ages	1048	COVID-19	1	Number	2021	4891.45	6067.85	3792.16
1	Deaths	147	Libya	2	Female	22	All ages	1048	COVID-19	1	Number	2021	2430.93	3014.31	1883
1	Deaths	147	Libya	3	Both	22	All ages	1048	COVID-19	1	Number	2021	7322.38	9082.07	5675.67
1	Deaths	84	Ireland	1	Male	22	All ages	1048	COVID-19	1	Number	2021	2072.66	2204.76	1946.26
1	Deaths	84	Ireland	2	Female	22	All ages	1048	COVID-19	1	Number	2021	1602.36	1688.16	1522.26
1	Deaths	84	Ireland	3	Both	22	All ages	1048	COVID-19	1	Number	2021	3675.02	3881.72	3481.31
1	Deaths	161	Bangladesh	1	Male	22	All ages	1048	COVID-19	1	Number	2021	89186.2	108287	76391
1	Deaths	161	Bangladesh	2	Female	22	All ages	1048	COVID-19	1	Number	2021	41154.5	49958	35257.2
1	Deaths	161	Bangladesh	3	Both	22	All ages	1048	COVID-19	1	Number	2021	130341	158232	111654
1	Deaths	82	Greece	1	Male	22	All ages	1048	COVID-19	1	Number	2021	9308.9	9309.19	9307.97
1	Deaths	82	Greece	2	Female	22	All ages	1048	COVID-19	1	Number	2021	6643.1	6643.72	6642.53
1	Deaths	82	Greece	3	Both	22	All ages	1048	COVID-19	1	Number	2021	15952	15952.9	15950.5
1	Deaths	129	Honduras	1	Male	22	All ages	1048	COVID-19	1	Number	2021	9041.39	11680.9	7241.72
1	Deaths	129	Honduras	2	Female	22	All ages	1048	COVID-19	1	Number	2021	5188.8	6706.93	4152.54
1	Deaths	129	Honduras	3	Both	22	All ages	1048	COVID-19	1	Number	2021	14230.2	18387.9	11393.5
1	Deaths	351	Guam	1	Male	22	All ages	1048	COVID-19	1	Number	2021	102.953	132.354	87.3006
1	Deaths	351	Guam	2	Female	22	All ages	1048	COVID-19	1	Number	2021	71.8076	92.3268	60.8813
1	Deaths	351	Guam	3	Both	22	All ages	1048	COVID-19	1	Number	2021	174.76	224.681	148.188
1	Deaths	133	Venezuela (Bolivarian Republic of)	1	Male	22	All ages	1048	COVID-19	1	Number	2021	37088.2	40115.2	34838.9
1	Deaths	133	Venezuela (Bolivarian Republic of)	2	Female	22	All ages	1048	COVID-19	1	Number	2021	24905.7	26939.6	23394.3
1	Deaths	133	Venezuela (Bolivarian Republic of)	3	Both	22	All ages	1048	COVID-19	1	Number	2021	61994	67058	58233
1	Deaths	116	Saint Lucia	1	Male	22	All ages	1048	COVID-19	1	Number	2021	206.607	328.948	177.01
1	Deaths	116	Saint Lucia	2	Female	22	All ages	1048	COVID-19	1	Number	2021	131.609	209.538	112.735
1	Deaths	116	Saint Lucia	3	Both	22	All ages	1048	COVID-19	1	Number	2021	338.216	538.487	289.755
1	Deaths	522	Sudan	1	Male	22	All ages	1048	COVID-19	1	Number	2021	23013.4	34191.1	13524.6
1	Deaths	522	Sudan	2	Female	22	All ages	1048	COVID-19	1	Number	2021	10011.3	14865.2	5886.76
1	Deaths	522	Sudan	3	Both	22	All ages	1048	COVID-19	1	Number	2021	33024.7	49056.2	19412.2
1	Deaths	380	Palau	1	Male	22	All ages	1048	COVID-19	1	Number	2021	2.5e-09	2.5e-09	2.5e-09
1	Deaths	380	Palau	2	Female	22	All ages	1048	COVID-19	1	Number	2021	2.5e-09	2.5e-09	2.5e-09
1	Deaths	380	Palau	3	Both	22	All ages	1048	COVID-19	1	Number	2021	5e-09	5e-09	5e-09
1	Deaths	50	Montenegro	1	Male	22	All ages	1048	COVID-19	1	Number	2021	1367.69	1652.26	1108.84
1	Deaths	50	Montenegro	2	Female	22	All ages	1048	COVID-19	1	Number	2021	961.528	1116.39	793.34
1	Deaths	50	Montenegro	3	Both	22	All ages	1048	COVID-19	1	Number	2021	2329.21	2719.51	1921.2
1	Deaths	396	San Marino	1	Male	22	All ages	1048	COVID-19	1	Number	2021	24.9836	24.9607	24.959
1	Deaths	396	San Marino	2	Female	22	All ages	1048	COVID-19	1	Number	2021	16.0531	16.0392	16.0363
1	Deaths	396	San Marino	3	Both	22	All ages	1048	COVID-19	1	Number	2021	41.0367	41	40.9956
1	Deaths	34	Azerbaijan	1	Male	22	All ages	1048	COVID-19	1	Number	2021	11652	13534.1	9259
1	Deaths	34	Azerbaijan	2	Female	22	All ages	1048	COVID-19	1	Number	2021	7740.58	8994.09	6149.32
1	Deaths	34	Azerbaijan	3	Both	22	All ages	1048	COVID-19	1	Number	2021	19392.6	22528.2	15409
1	Deaths	99	Uruguay	1	Male	22	All ages	1048	COVID-19	1	Number	2021	3195.87	3195.99	3195.28
1	Deaths	99	Uruguay	2	Female	22	All ages	1048	COVID-19	1	Number	2021	2792.2	2792.68	2791.78
1	Deaths	99	Uruguay	3	Both	22	All ages	1048	COVID-19	1	Number	2021	5988.07	5988.67	5987.1
1	Deaths	149	Palestine	1	Male	22	All ages	1048	COVID-19	1	Number	2021	2093.49	2203.19	2083.85
1	Deaths	149	Palestine	2	Female	22	All ages	1048	COVID-19	1	Number	2021	1176.88	1238.26	1170.26
1	Deaths	149	Palestine	3	Both	22	All ages	1048	COVID-19	1	Number	2021	3270.37	3441.68	3254.2
1	Deaths	413	Tokelau	1	Male	22	All ages	1048	COVID-19	1	Number	2021	2.5e-09	2.5e-09	2.5e-09
1	Deaths	413	Tokelau	2	Female	22	All ages	1048	COVID-19	1	Number	2021	2.5e-09	2.5e-09	2.5e-09
1	Deaths	413	Tokelau	3	Both	22	All ages	1048	COVID-19	1	Number	2021	5e-09	5e-09	5e-09
1	Deaths	211	Mali	1	Male	22	All ages	1048	COVID-19	1	Number	2021	17758.7	19513.9	16129.6
1	Deaths	211	Mali	2	Female	22	All ages	1048	COVID-19	1	Number	2021	8380.61	9195.26	7603.59
1	Deaths	211	Mali	3	Both	22	All ages	1048	COVID-19	1	Number	2021	26139.3	28699.8	23711.3
1	Deaths	178	Eritrea	1	Male	22	All ages	1048	COVID-19	1	Number	2021	2812.18	3204.48	2333.7
1	Deaths	178	Eritrea	2	Female	22	All ages	1048	COVID-19	1	Number	2021	1883.56	2147.83	1563.46
1	Deaths	178	Eritrea	3	Both	22	All ages	1048	COVID-19	1	Number	2021	4695.74	5352.22	3897.16
1	Deaths	144	Jordan	1	Male	22	All ages	1048	COVID-19	1	Number	2021	7913.92	9348.14	6174.88
1	Deaths	144	Jordan	2	Female	22	All ages	1048	COVID-19	1	Number	2021	3381.84	3998.59	2639.13
1	Deaths	144	Jordan	3	Both	22	All ages	1048	COVID-19	1	Number	2021	11295.8	13346.7	8814.07
1	Deaths	198	Zimbabwe	1	Male	22	All ages	1048	COVID-19	1	Number	2021	24892.7	29360	19302.5
1	Deaths	198	Zimbabwe	2	Female	22	All ages	1048	COVID-19	1	Number	2021	16563.8	19511.3	12827.4
1	Deaths	198	Zimbabwe	3	Both	22	All ages	1048	COVID-19	1	Number	2021	41456.5	48871.3	32131.2
1	Deaths	118	Suriname	1	Male	22	All ages	1048	COVID-19	1	Number	2021	656.636	850.187	644.211
1	Deaths	118	Suriname	2	Female	22	All ages	1048	COVID-19	1	Number	2021	429.824	556.425	421.457
1	Deaths	118	Suriname	3	Both	22	All ages	1048	COVID-19	1	Number	2021	1086.46	1406.61	1065.89
1	Deaths	148	Morocco	1	Male	22	All ages	1048	COVID-19	1	Number	2021	22280.4	27872.5	17634.4
1	Deaths	148	Morocco	2	Female	22	All ages	1048	COVID-19	1	Number	2021	11638	14557.2	9213.26
1	Deaths	148	Morocco	3	Both	22	All ages	1048	COVID-19	1	Number	2021	33918.4	42430.2	26847.7
1	Deaths	435	South Sudan	1	Male	22	All ages	1048	COVID-19	1	Number	2021	5954.82	7705.68	4350.62
1	Deaths	435	South Sudan	2	Female	22	All ages	1048	COVID-19	1	Number	2021	2781.81	3598.48	2032.33
1	Deaths	435	South Sudan	3	Both	22	All ages	1048	COVID-19	1	Number	2021	8736.63	11305.3	6383.07
1	Deaths	150	Oman	1	Male	22	All ages	1048	COVID-19	1	Number	2021	3167.23	3328.27	2988.95
1	Deaths	150	Oman	2	Female	22	All ages	1048	COVID-19	1	Number	2021	1127.25	1186.1	1064.07
1	Deaths	150	Oman	3	Both	22	All ages	1048	COVID-19	1	Number	2021	4294.48	4514.92	4053.23
1	Deaths	115	Jamaica	1	Male	22	All ages	1048	COVID-19	1	Number	2021	2145.59	3046.19	1294.87
1	Deaths	115	Jamaica	2	Female	22	All ages	1048	COVID-19	1	Number	2021	1459.74	2072.3	881.028
1	Deaths	115	Jamaica	3	Both	22	All ages	1048	COVID-19	1	Number	2021	3605.33	5118.48	2175.77
1	Deaths	181	Madagascar	1	Male	22	All ages	1048	COVID-19	1	Number	2021	15654	17385.3	12849.8
1	Deaths	181	Madagascar	2	Female	22	All ages	1048	COVID-19	1	Number	2021	8443.51	9375.63	6932.72
1	Deaths	181	Madagascar	3	Both	22	All ages	1048	COVID-19	1	Number	2021	24097.5	26762.3	19782.5
1	Deaths	117	Saint Vincent and the Grenadines	1	Male	22	All ages	1048	COVID-19	1	Number	2021	68.9249	92.3434	52.7313
1	Deaths	117	Saint Vincent and the Grenadines	2	Female	22	All ages	1048	COVID-19	1	Number	2021	36.865	49.3889	28.1974
1	Deaths	117	Saint Vincent and the Grenadines	3	Both	22	All ages	1048	COVID-19	1	Number	2021	105.79	141.732	80.928
1	Deaths	67	Japan	1	Male	22	All ages	1048	COVID-19	1	Number	2021	9304.39	11650.8	7727.61
1	Deaths	67	Japan	2	Female	22	All ages	1048	COVID-19	1	Number	2021	5582.23	6952.1	4519.31
1	Deaths	67	Japan	3	Both	22	All ages	1048	COVID-19	1	Number	2021	14886.6	17714.4	12577
1	Deaths	83	Iceland	1	Male	22	All ages	1048	COVID-19	1	Number	2021	3.94766	14.0344	1.99918
1	Deaths	83	Iceland	2	Female	22	All ages	1048	COVID-19	1	Number	2021	6.51711	24.2503	3.5778
1	Deaths	83	Iceland	3	Both	22	All ages	1048	COVID-19	1	Number	2021	10.4648	37.2041	5.6097
1	Deaths	130	Mexico	1	Male	22	All ages	1048	COVID-19	1	Number	2021	166584	221289	112291
1	Deaths	130	Mexico	2	Female	22	All ages	1048	COVID-19	1	Number	2021	104750	142773	71190.1
1	Deaths	130	Mexico	3	Both	22	All ages	1048	COVID-19	1	Number	2021	271334	348703	202509
1	Deaths	151	Qatar	1	Male	22	All ages	1048	COVID-19	1	Number	2021	604.809	732.709	444.209
1	Deaths	151	Qatar	2	Female	22	All ages	1048	COVID-19	1	Number	2021	117.841	142.608	86.4519
1	Deaths	151	Qatar	3	Both	22	All ages	1048	COVID-19	1	Number	2021	722.65	875.317	530.661
1	Deaths	152	Saudi Arabia	1	Male	22	All ages	1048	COVID-19	1	Number	2021	6671.48	9142.96	4504.32
1	Deaths	152	Saudi Arabia	2	Female	22	All ages	1048	COVID-19	1	Number	2021	2183.5	2992.3	1472.88
1	Deaths	152	Saudi Arabia	3	Both	22	All ages	1048	COVID-19	1	Number	2021	8854.98	12135.4	5977
1	Deaths	182	Malawi	1	Male	22	All ages	1048	COVID-19	1	Number	2021	18849.6	21171.8	16441.2
1	Deaths	182	Malawi	2	Female	22	All ages	1048	COVID-19	1	Number	2021	12112.5	13585.6	10555.8
1	Deaths	182	Malawi	3	Both	22	All ages	1048	COVID-19	1	Number	2021	30962.1	34757.4	26997.3
1	Deaths	216	Senegal	1	Male	22	All ages	1048	COVID-19	1	Number	2021	10224.9	11542.7	8606.68
1	Deaths	216	Senegal	2	Female	22	All ages	1048	COVID-19	1	Number	2021	5708.06	6434.42	4809.59
1	Deaths	216	Senegal	3	Both	22	All ages	1048	COVID-19	1	Number	2021	15933	17977.1	13415.2
1	Deaths	35	Georgia	1	Male	22	All ages	1048	COVID-19	1	Number	2021	6280.86	8087.54	4548.29
1	Deaths	35	Georgia	2	Female	22	All ages	1048	COVID-19	1	Number	2021	7139.86	9114.15	5211.11
1	Deaths	35	Georgia	3	Both	22	All ages	1048	COVID-19	1	Number	2021	13420.7	17159.7	9729.02
2	DALYs (Disability-Adjusted Life Years)	51	Poland	1	Male	22	All ages	1048	COVID-19	1	Number	2020	640322	848185	457586
2	DALYs (Disability-Adjusted Life Years)	51	Poland	2	Female	22	All ages	1048	COVID-19	1	Number	2020	415590	545300	306048
2	DALYs (Disability-Adjusted Life Years)	51	Poland	3	Both	22	All ages	1048	COVID-19	1	Number	2020	1.05591e+06	1.3573e+06	838508
2	DALYs (Disability-Adjusted Life Years)	16	Philippines	1	Male	22	All ages	1048	COVID-19	1	Number	2020	270624	429099	135355
2	DALYs (Disability-Adjusted Life Years)	16	Philippines	2	Female	22	All ages	1048	COVID-19	1	Number	2020	198301	302594	106286
2	DALYs (Disability-Adjusted Life Years)	16	Philippines	3	Both	22	All ages	1048	COVID-19	1	Number	2020	468925	651320	306054
2	DALYs (Disability-Adjusted Life Years)	63	Ukraine	1	Male	22	All ages	1048	COVID-19	1	Number	2020	328078	803159	41928.1
2	DALYs (Disability-Adjusted Life Years)	63	Ukraine	2	Female	22	All ages	1048	COVID-19	1	Number	2020	260402	589574	42681
2	DALYs (Disability-Adjusted Life Years)	63	Ukraine	3	Both	22	All ages	1048	COVID-19	1	Number	2020	588480	1.22504e+06	180993
2	DALYs (Disability-Adjusted Life Years)	40	Turkmenistan	1	Male	22	All ages	1048	COVID-19	1	Number	2020	86698.1	102959	66711.1
2	DALYs (Disability-Adjusted Life Years)	40	Turkmenistan	2	Female	22	All ages	1048	COVID-19	1	Number	2020	51829.9	61923	40318.3
2	DALYs (Disability-Adjusted Life Years)	40	Turkmenistan	3	Both	22	All ages	1048	COVID-19	1	Number	2020	138528	164986	107123
2	DALYs (Disability-Adjusted Life Years)	28	Solomon Islands	1	Male	22	All ages	1048	COVID-19	1	Number	2020	1.68869	6.48376	0.148639
2	DALYs (Disability-Adjusted Life Years)	28	Solomon Islands	2	Female	22	All ages	1048	COVID-19	1	Number	2020	2.38288	9.72399	0.20218
2	DALYs (Disability-Adjusted Life Years)	28	Solomon Islands	3	Both	22	All ages	1048	COVID-19	1	Number	2020	4.07157	15.9891	0.346216
2	DALYs (Disability-Adjusted Life Years)	75	Austria	1	Male	22	All ages	1048	COVID-19	1	Number	2020	81491.9	86803.2	76417
2	DALYs (Disability-Adjusted Life Years)	75	Austria	2	Female	22	All ages	1048	COVID-19	1	Number	2020	51916.1	55367.9	48817.4
2	DALYs (Disability-Adjusted Life Years)	75	Austria	3	Both	22	All ages	1048	COVID-19	1	Number	2020	133408	142105	125557
2	DALYs (Disability-Adjusted Life Years)	52	Romania	1	Male	22	All ages	1048	COVID-19	1	Number	2020	374907	527611	232635
2	DALYs (Disability-Adjusted Life Years)	52	Romania	2	Female	22	All ages	1048	COVID-19	1	Number	2020	239984	341433	150556
2	DALYs (Disability-Adjusted Life Years)	52	Romania	3	Both	22	All ages	1048	COVID-19	1	Number	2020	614891	866463	382789
2	DALYs (Disability-Adjusted Life Years)	24	Marshall Islands	1	Male	22	All ages	1048	COVID-19	1	Number	2020	0.23143	0.636873	0.0344581
2	DALYs (Disability-Adjusted Life Years)	24	Marshall Islands	2	Female	22	All ages	1048	COVID-19	1	Number	2020	0.316794	0.915141	0.0430902
2	DALYs (Disability-Adjusted Life Years)	24	Marshall Islands	3	Both	22	All ages	1048	COVID-19	1	Number	2020	0.548224	1.52648	0.0792711
2	DALYs (Disability-Adjusted Life Years)	12	Lao People's Democratic Republic	1	Male	22	All ages	1048	COVID-19	1	Number	2020	6.67212	23.176	0.548609
2	DALYs (Disability-Adjusted Life Years)	12	Lao People's Democratic Republic	2	Female	22	All ages	1048	COVID-19	1	Number	2020	10.3066	36.8491	0.75836
2	DALYs (Disability-Adjusted Life Years)	12	Lao People's Democratic Republic	3	Both	22	All ages	1048	COVID-19	1	Number	2020	16.9787	58.88	1.27309
2	DALYs (Disability-Adjusted Life Years)	6	China	1	Male	22	All ages	1048	COVID-19	1	Number	2020	396028	2.02808e+06	93927.1
2	DALYs (Disability-Adjusted Life Years)	6	China	2	Female	22	All ages	1048	COVID-19	1	Number	2020	212000	1.05378e+06	51240.3
2	DALYs (Disability-Adjusted Life Years)	6	China	3	Both	22	All ages	1048	COVID-19	1	Number	2020	608028	3.08186e+06	144918
2	DALYs (Disability-Adjusted Life Years)	53	Serbia	1	Male	22	All ages	1048	COVID-19	1	Number	2020	148124	251157	49962.8
2	DALYs (Disability-Adjusted Life Years)	53	Serbia	2	Female	22	All ages	1048	COVID-19	1	Number	2020	86258.5	146656	31321.9
2	DALYs (Disability-Adjusted Life Years)	53	Serbia	3	Both	22	All ages	1048	COVID-19	1	Number	2020	234382	397007	79550.8
2	DALYs (Disability-Adjusted Life Years)	48	Hungary	1	Male	22	All ages	1048	COVID-19	1	Number	2020	118178	163075	81598.8
2	DALYs (Disability-Adjusted Life Years)	48	Hungary	2	Female	22	All ages	1048	COVID-19	1	Number	2020	88360.6	120006	62216.6
2	DALYs (Disability-Adjusted Life Years)	48	Hungary	3	Both	22	All ages	1048	COVID-19	1	Number	2020	206539	281687	143766
2	DALYs (Disability-Adjusted Life Years)	36	Kazakhstan	1	Male	22	All ages	1048	COVID-19	1	Number	2020	339249	444832	231980
2	DALYs (Disability-Adjusted Life Years)	36	Kazakhstan	2	Female	22	All ages	1048	COVID-19	1	Number	2020	246637	319059	174559
2	DALYs (Disability-Adjusted Life Years)	36	Kazakhstan	3	Both	22	All ages	1048	COVID-19	1	Number	2020	585885	766225	416076
2	DALYs (Disability-Adjusted Life Years)	76	Belgium	1	Male	22	All ages	1048	COVID-19	1	Number	2020	193939	202375	185610
2	DALYs (Disability-Adjusted Life Years)	76	Belgium	2	Female	22	All ages	1048	COVID-19	1	Number	2020	136273	143975	129788
2	DALYs (Disability-Adjusted Life Years)	76	Belgium	3	Both	22	All ages	1048	COVID-19	1	Number	2020	330212	345092	318110
2	DALYs (Disability-Adjusted Life Years)	111	Dominican Republic	1	Male	22	All ages	1048	COVID-19	1	Number	2020	63217.8	124305	26950
2	DALYs (Disability-Adjusted Life Years)	111	Dominican Republic	2	Female	22	All ages	1048	COVID-19	1	Number	2020	30934.1	58616.3	14462.3
2	DALYs (Disability-Adjusted Life Years)	111	Dominican Republic	3	Both	22	All ages	1048	COVID-19	1	Number	2020	94151.8	179877	43593.5
2	DALYs (Disability-Adjusted Life Years)	123	Peru	1	Male	22	All ages	1048	COVID-19	1	Number	2020	1.50324e+06	1.92605e+06	1.12397e+06
2	DALYs (Disability-Adjusted Life Years)	123	Peru	2	Female	22	All ages	1048	COVID-19	1	Number	2020	793562	1.05984e+06	555063
2	DALYs (Disability-Adjusted Life Years)	123	Peru	3	Both	22	All ages	1048	COVID-19	1	Number	2020	2.29681e+06	2.92809e+06	1.79235e+06
2	DALYs (Disability-Adjusted Life Years)	99	Uruguay	1	Male	22	All ages	1048	COVID-19	1	Number	2020	2196.7	2238.01	2176.2
2	DALYs (Disability-Adjusted Life Years)	99	Uruguay	2	Female	22	All ages	1048	COVID-19	1	Number	2020	1738.71	1808.66	1702.16
2	DALYs (Disability-Adjusted Life Years)	99	Uruguay	3	Both	22	All ages	1048	COVID-19	1	Number	2020	3935.42	4042.88	3878.3
2	DALYs (Disability-Adjusted Life Years)	147	Libya	1	Male	22	All ages	1048	COVID-19	1	Number	2020	92374.5	106968	72634.4
2	DALYs (Disability-Adjusted Life Years)	147	Libya	2	Female	22	All ages	1048	COVID-19	1	Number	2020	45160.3	53881.4	35425.5
2	DALYs (Disability-Adjusted Life Years)	147	Libya	3	Both	22	All ages	1048	COVID-19	1	Number	2020	137535	159958	107035
2	DALYs (Disability-Adjusted Life Years)	135	Brazil	1	Male	22	All ages	1048	COVID-19	1	Number	2020	3.11422e+06	3.4903e+06	2.79452e+06
2	DALYs (Disability-Adjusted Life Years)	135	Brazil	2	Female	22	All ages	1048	COVID-19	1	Number	2020	1.94501e+06	2.19011e+06	1.73283e+06
2	DALYs (Disability-Adjusted Life Years)	135	Brazil	3	Both	22	All ages	1048	COVID-19	1	Number	2020	5.05923e+06	5.56731e+06	4.61653e+06
2	DALYs (Disability-Adjusted Life Years)	112	Grenada	1	Male	22	All ages	1048	COVID-19	1	Number	2020	0.566333	1.60368	0.157484
2	DALYs (Disability-Adjusted Life Years)	112	Grenada	2	Female	22	All ages	1048	COVID-19	1	Number	2020	0.880868	2.65224	0.216801
2	DALYs (Disability-Adjusted Life Years)	112	Grenada	3	Both	22	All ages	1048	COVID-19	1	Number	2020	1.4472	4.30025	0.373061
2	DALYs (Disability-Adjusted Life Years)	66	Brunei Darussalam	1	Male	22	All ages	1048	COVID-19	1	Number	2020	337.462	1422.62	39.2874
2	DALYs (Disability-Adjusted Life Years)	66	Brunei Darussalam	2	Female	22	All ages	1048	COVID-19	1	Number	2020	137.334	491.201	25.0832
2	DALYs (Disability-Adjusted Life Years)	66	Brunei Darussalam	3	Both	22	All ages	1048	COVID-19	1	Number	2020	474.796	1918.53	68.7403
2	DALYs (Disability-Adjusted Life Years)	87	Luxembourg	1	Male	22	All ages	1048	COVID-19	1	Number	2020	5603.78	7398.53	3940.34
2	DALYs (Disability-Adjusted Life Years)	87	Luxembourg	2	Female	22	All ages	1048	COVID-19	1	Number	2020	3680.15	4277.32	3142.86
2	DALYs (Disability-Adjusted Life Years)	87	Luxembourg	3	Both	22	All ages	1048	COVID-19	1	Number	2020	9283.93	11416.6	7296.52
2	DALYs (Disability-Adjusted Life Years)	77	Cyprus	1	Male	22	All ages	1048	COVID-19	1	Number	2020	1981.02	5016.19	1060.89
2	DALYs (Disability-Adjusted Life Years)	77	Cyprus	2	Female	22	All ages	1048	COVID-19	1	Number	2020	1236.72	3197.22	511.872
2	DALYs (Disability-Adjusted Life Years)	77	Cyprus	3	Both	22	All ages	1048	COVID-19	1	Number	2020	3217.74	8054.99	1731.46
2	DALYs (Disability-Adjusted Life Years)	38	Mongolia	1	Male	22	All ages	1048	COVID-19	1	Number	2020	39.5502	86.5194	16.0934
2	DALYs (Disability-Adjusted Life Years)	38	Mongolia	2	Female	22	All ages	1048	COVID-19	1	Number	2020	43.2425	106.662	15.777
2	DALYs (Disability-Adjusted Life Years)	38	Mongolia	3	Both	22	All ages	1048	COVID-19	1	Number	2020	82.7927	192.256	32.9409
2	DALYs (Disability-Adjusted Life Years)	129	Honduras	1	Male	22	All ages	1048	COVID-19	1	Number	2020	168781	192270	143327
2	DALYs (Disability-Adjusted Life Years)	129	Honduras	2	Female	22	All ages	1048	COVID-19	1	Number	2020	98066.5	114545	82384.1
2	DALYs (Disability-Adjusted Life Years)	129	Honduras	3	Both	22	All ages	1048	COVID-19	1	Number	2020	266847	305677	225993
2	DALYs (Disability-Adjusted Life Years)	41	Uzbekistan	1	Male	22	All ages	1048	COVID-19	1	Number	2020	308082	429899	161836
2	DALYs (Disability-Adjusted Life Years)	41	Uzbekistan	2	Female	22	All ages	1048	COVID-19	1	Number	2020	187657	262712	101701
2	DALYs (Disability-Adjusted Life Years)	41	Uzbekistan	3	Both	22	All ages	1048	COVID-19	1	Number	2020	495739	689401	270119
2	DALYs (Disability-Adjusted Life Years)	7	Democratic People's Republic of Korea	1	Male	22	All ages	1048	COVID-19	1	Number	2020	7362.71	34482.1	1422.95
2	DALYs (Disability-Adjusted Life Years)	7	Democratic People's Republic of Korea	2	Female	22	All ages	1048	COVID-19	1	Number	2020	5594.42	25949.3	1108.64
2	DALYs (Disability-Adjusted Life Years)	7	Democratic People's Republic of Korea	3	Both	22	All ages	1048	COVID-19	1	Number	2020	12957.1	60431.4	2522.29
2	DALYs (Disability-Adjusted Life Years)	88	Malta	1	Male	22	All ages	1048	COVID-19	1	Number	2020	2508.06	3182.53	2005.2
2	DALYs (Disability-Adjusted Life Years)	88	Malta	2	Female	22	All ages	1048	COVID-19	1	Number	2020	1640.56	1996.92	1387.39
2	DALYs (Disability-Adjusted Life Years)	88	Malta	3	Both	22	All ages	1048	COVID-19	1	Number	2020	4148.63	5114.62	3418.67
2	DALYs (Disability-Adjusted Life Years)	117	Saint Vincent and the Grenadines	1	Male	22	All ages	1048	COVID-19	1	Number	2020	1.65934	4.15418	0.520134
2	DALYs (Disability-Adjusted Life Years)	117	Saint Vincent and the Grenadines	2	Female	22	All ages	1048	COVID-19	1	Number	2020	2.51832	6.73788	0.645861
2	DALYs (Disability-Adjusted Life Years)	117	Saint Vincent and the Grenadines	3	Both	22	All ages	1048	COVID-19	1	Number	2020	4.17766	10.7473	1.17873
2	DALYs (Disability-Adjusted Life Years)	8	Taiwan (Province of China)	1	Male	22	All ages	1048	COVID-19	1	Number	2020	154.537	246.496	85.535
2	DALYs (Disability-Adjusted Life Years)	8	Taiwan (Province of China)	2	Female	22	All ages	1048	COVID-19	1	Number	2020	130.68	261.683	67.5733
2	DALYs (Disability-Adjusted Life Years)	8	Taiwan (Province of China)	3	Both	22	All ages	1048	COVID-19	1	Number	2020	285.217	488.93	168.66
2	DALYs (Disability-Adjusted Life Years)	171	Democratic Republic of the Congo	1	Male	22	All ages	1048	COVID-19	1	Number	2020	1.04414e+06	1.15384e+06	937200
2	DALYs (Disability-Adjusted Life Years)	171	Democratic Republic of the Congo	2	Female	22	All ages	1048	COVID-19	1	Number	2020	615166	721670	535270
2	DALYs (Disability-Adjusted Life Years)	171	Democratic Republic of the Congo	3	Both	22	All ages	1048	COVID-19	1	Number	2020	1.65931e+06	1.86776e+06	1.47592e+06
2	DALYs (Disability-Adjusted Life Years)	114	Haiti	1	Male	22	All ages	1048	COVID-19	1	Number	2020	195344	330074	85707.4
2	DALYs (Disability-Adjusted Life Years)	114	Haiti	2	Female	22	All ages	1048	COVID-19	1	Number	2020	106399	177610	47709.1
2	DALYs (Disability-Adjusted Life Years)	114	Haiti	3	Both	22	All ages	1048	COVID-19	1	Number	2020	301742	507684	134259
2	DALYs (Disability-Adjusted Life Years)	72	New Zealand	1	Male	22	All ages	1048	COVID-19	1	Number	2020	350.63	388.38	316.386
2	DALYs (Disability-Adjusted Life Years)	72	New Zealand	2	Female	22	All ages	1048	COVID-19	1	Number	2020	205.132	231.248	181.414
2	DALYs (Disability-Adjusted Life Years)	72	New Zealand	3	Both	22	All ages	1048	COVID-19	1	Number	2020	555.762	604.872	511.033
2	DALYs (Disability-Adjusted Life Years)	208	Guinea	1	Male	22	All ages	1048	COVID-19	1	Number	2020	214402	256603	180012
2	DALYs (Disability-Adjusted Life Years)	208	Guinea	2	Female	22	All ages	1048	COVID-19	1	Number	2020	118289	146597	97486.4
2	DALYs (Disability-Adjusted Life Years)	208	Guinea	3	Both	22	All ages	1048	COVID-19	1	Number	2020	332691	401260	278133
2	DALYs (Disability-Adjusted Life Years)	17	Sri Lanka	1	Male	22	All ages	1048	COVID-19	1	Number	2020	11880.6	12326.8	11730.9
2	DALYs (Disability-Adjusted Life Years)	17	Sri Lanka	2	Female	22	All ages	1048	COVID-19	1	Number	2020	8218.28	8939.38	7970.3
2	DALYs (Disability-Adjusted Life Years)	17	Sri Lanka	3	Both	22	All ages	1048	COVID-19	1	Number	2020	20098.9	21266.2	19702.2
2	DALYs (Disability-Adjusted Life Years)	101	Canada	1	Male	22	All ages	1048	COVID-19	1	Number	2020	323044	342337	303109
2	DALYs (Disability-Adjusted Life Years)	101	Canada	2	Female	22	All ages	1048	COVID-19	1	Number	2020	214777	228198	201330
2	DALYs (Disability-Adjusted Life Years)	101	Canada	3	Both	22	All ages	1048	COVID-19	1	Number	2020	537821	569824	504508
2	DALYs (Disability-Adjusted Life Years)	33	Armenia	1	Male	22	All ages	1048	COVID-19	1	Number	2020	73841.9	95284.6	51005
2	DALYs (Disability-Adjusted Life Years)	33	Armenia	2	Female	22	All ages	1048	COVID-19	1	Number	2020	48108.9	62835.3	33668.8
2	DALYs (Disability-Adjusted Life Years)	33	Armenia	3	Both	22	All ages	1048	COVID-19	1	Number	2020	121951	155466	85486.4
2	DALYs (Disability-Adjusted Life Years)	60	Lithuania	1	Male	22	All ages	1048	COVID-19	1	Number	2020	47998.3	69763.9	28048.9
2	DALYs (Disability-Adjusted Life Years)	60	Lithuania	2	Female	22	All ages	1048	COVID-19	1	Number	2020	35197.1	50803.5	21239.7
2	DALYs (Disability-Adjusted Life Years)	60	Lithuania	3	Both	22	All ages	1048	COVID-19	1	Number	2020	83195.4	119772	49434.6
2	DALYs (Disability-Adjusted Life Years)	29	Tonga	1	Male	22	All ages	1048	COVID-19	1	Number	2020	1.29858e-07	1.29858e-07	1.29858e-07
2	DALYs (Disability-Adjusted Life Years)	29	Tonga	2	Female	22	All ages	1048	COVID-19	1	Number	2020	1.2984e-07	1.2984e-07	1.2984e-07
2	DALYs (Disability-Adjusted Life Years)	29	Tonga	3	Both	22	All ages	1048	COVID-19	1	Number	2020	2.59698e-07	2.59698e-07	2.59698e-07
2	DALYs (Disability-Adjusted Life Years)	396	San Marino	1	Male	22	All ages	1048	COVID-19	1	Number	2020	582.851	875.765	385.037
2	DALYs (Disability-Adjusted Life Years)	396	San Marino	2	Female	22	All ages	1048	COVID-19	1	Number	2020	515.897	735.796	345.081
2	DALYs (Disability-Adjusted Life Years)	396	San Marino	3	Both	22	All ages	1048	COVID-19	1	Number	2020	1098.75	1588.74	741.131
2	DALYs (Disability-Adjusted Life Years)	89	Netherlands	1	Male	22	All ages	1048	COVID-19	1	Number	2020	143492	158627	127125
2	DALYs (Disability-Adjusted Life Years)	89	Netherlands	2	Female	22	All ages	1048	COVID-19	1	Number	2020	90902.1	100635	80562.2
2	DALYs (Disability-Adjusted Life Years)	89	Netherlands	3	Both	22	All ages	1048	COVID-19	1	Number	2020	234394	258242	208444
2	DALYs (Disability-Adjusted Life Years)	196	South Africa	1	Male	22	All ages	1048	COVID-19	1	Number	2020	1.73466e+06	1.7596e+06	1.72295e+06
2	DALYs (Disability-Adjusted Life Years)	196	South Africa	2	Female	22	All ages	1048	COVID-19	1	Number	2020	1.13423e+06	1.17395e+06	1.11387e+06
2	DALYs (Disability-Adjusted Life Years)	196	South Africa	3	Both	22	All ages	1048	COVID-19	1	Number	2020	2.86889e+06	2.93341e+06	2.83696e+06
2	DALYs (Disability-Adjusted Life Years)	183	Mauritius	1	Male	22	All ages	1048	COVID-19	1	Number	2020	225.506	325.007	137.518
2	DALYs (Disability-Adjusted Life Years)	183	Mauritius	2	Female	22	All ages	1048	COVID-19	1	Number	2020	132.936	201.277	76.637
2	DALYs (Disability-Adjusted Life Years)	183	Mauritius	3	Both	22	All ages	1048	COVID-19	1	Number	2020	358.442	514.912	217.441
2	DALYs (Disability-Adjusted Life Years)	30	Vanuatu	1	Male	22	All ages	1048	COVID-19	1	Number	2020	0.0162748	0.0441205	0.00431421
2	DALYs (Disability-Adjusted Life Years)	30	Vanuatu	2	Female	22	All ages	1048	COVID-19	1	Number	2020	0.0222908	0.0607119	0.0053393
2	DALYs (Disability-Adjusted Life Years)	30	Vanuatu	3	Both	22	All ages	1048	COVID-19	1	Number	2020	0.0385656	0.104188	0.00949301
2	DALYs (Disability-Adjusted Life Years)	148	Morocco	1	Male	22	All ages	1048	COVID-19	1	Number	2020	727869	853181	583223
2	DALYs (Disability-Adjusted Life Years)	148	Morocco	2	Female	22	All ages	1048	COVID-19	1	Number	2020	370560	436848	299818
2	DALYs (Disability-Adjusted Life Years)	148	Morocco	3	Both	22	All ages	1048	COVID-19	1	Number	2020	1.09843e+06	1.28647e+06	882547
2	DALYs (Disability-Adjusted Life Years)	19	Timor-Leste	1	Male	22	All ages	1048	COVID-19	1	Number	2020	2.23891	7.62321	0.274094
2	DALYs (Disability-Adjusted Life Years)	19	Timor-Leste	2	Female	22	All ages	1048	COVID-19	1	Number	2020	3.29578	10.9334	0.395156
2	DALYs (Disability-Adjusted Life Years)	19	Timor-Leste	3	Both	22	All ages	1048	COVID-19	1	Number	2020	5.53469	18.4086	0.665807
2	DALYs (Disability-Adjusted Life Years)	43	Albania	1	Male	22	All ages	1048	COVID-19	1	Number	2020	46090.2	73432.1	19204.8
2	DALYs (Disability-Adjusted Life Years)	43	Albania	2	Female	22	All ages	1048	COVID-19	1	Number	2020	26398.2	42001.8	12531.2
2	DALYs (Disability-Adjusted Life Years)	43	Albania	3	Both	22	All ages	1048	COVID-19	1	Number	2020	72488.5	115897	30446.4
2	DALYs (Disability-Adjusted Life Years)	45	Bulgaria	1	Male	22	All ages	1048	COVID-19	1	Number	2020	202619	283262	116965
2	DALYs (Disability-Adjusted Life Years)	45	Bulgaria	2	Female	22	All ages	1048	COVID-19	1	Number	2020	133511	186618	77914.4
2	DALYs (Disability-Adjusted Life Years)	45	Bulgaria	3	Both	22	All ages	1048	COVID-19	1	Number	2020	336130	463596	192555
2	DALYs (Disability-Adjusted Life Years)	10	Cambodia	1	Male	22	All ages	1048	COVID-19	1	Number	2020	13.0299	48.5982	1.89475
2	DALYs (Disability-Adjusted Life Years)	10	Cambodia	2	Female	22	All ages	1048	COVID-19	1	Number	2020	21.3069	79.3787	3.16716
2	DALYs (Disability-Adjusted Life Years)	10	Cambodia	3	Both	22	All ages	1048	COVID-19	1	Number	2020	34.3367	128.227	5.10928
2	DALYs (Disability-Adjusted Life Years)	136	Paraguay	1	Male	22	All ages	1048	COVID-19	1	Number	2020	36794.5	57602.6	19643
2	DALYs (Disability-Adjusted Life Years)	136	Paraguay	2	Female	22	All ages	1048	COVID-19	1	Number	2020	22037.8	34986.4	11429.4
2	DALYs (Disability-Adjusted Life Years)	136	Paraguay	3	Both	22	All ages	1048	COVID-19	1	Number	2020	58832.3	88989.6	33811.1
2	DALYs (Disability-Adjusted Life Years)	11	Indonesia	1	Male	22	All ages	1048	COVID-19	1	Number	2020	1.74081e+06	3.52379e+06	600506
2	DALYs (Disability-Adjusted Life Years)	11	Indonesia	2	Female	22	All ages	1048	COVID-19	1	Number	2020	911950	1.80399e+06	348127
2	DALYs (Disability-Adjusted Life Years)	11	Indonesia	3	Both	22	All ages	1048	COVID-19	1	Number	2020	2.65276e+06	5.33671e+06	940290
2	DALYs (Disability-Adjusted Life Years)	57	Belarus	1	Male	22	All ages	1048	COVID-19	1	Number	2020	222109	276293	177984
2	DALYs (Disability-Adjusted Life Years)	57	Belarus	2	Female	22	All ages	1048	COVID-19	1	Number	2020	177299	222029	141625
2	DALYs (Disability-Adjusted Life Years)	57	Belarus	3	Both	22	All ages	1048	COVID-19	1	Number	2020	399408	498331	320263
2	DALYs (Disability-Adjusted Life Years)	160	Afghanistan	1	Male	22	All ages	1048	COVID-19	1	Number	2020	698106	922437	528455
2	DALYs (Disability-Adjusted Life Years)	160	Afghanistan	2	Female	22	All ages	1048	COVID-19	1	Number	2020	385660	510863	290812
2	DALYs (Disability-Adjusted Life Years)	160	Afghanistan	3	Both	22	All ages	1048	COVID-19	1	Number	2020	1.08377e+06	1.4274e+06	819574
2	DALYs (Disability-Adjusted Life Years)	122	Ecuador	1	Male	22	All ages	1048	COVID-19	1	Number	2020	559558	663211	452761
2	DALYs (Disability-Adjusted Life Years)	122	Ecuador	2	Female	22	All ages	1048	COVID-19	1	Number	2020	299816	355111	244613
2	DALYs (Disability-Adjusted Life Years)	122	Ecuador	3	Both	22	All ages	1048	COVID-19	1	Number	2020	859374	1.02044e+06	702540
2	DALYs (Disability-Adjusted Life Years)	126	Costa Rica	1	Male	22	All ages	1048	COVID-19	1	Number	2020	33917.7	47291.2	23053.2
2	DALYs (Disability-Adjusted Life Years)	126	Costa Rica	2	Female	22	All ages	1048	COVID-19	1	Number	2020	19097.2	26341.6	12389.4
2	DALYs (Disability-Adjusted Life Years)	126	Costa Rica	3	Both	22	All ages	1048	COVID-19	1	Number	2020	53014.9	72230.6	36649.8
2	DALYs (Disability-Adjusted Life Years)	140	Bahrain	1	Male	22	All ages	1048	COVID-19	1	Number	2020	22255.1	25411	18514.6
2	DALYs (Disability-Adjusted Life Years)	140	Bahrain	2	Female	22	All ages	1048	COVID-19	1	Number	2020	6352.83	7409.91	5292.34
2	DALYs (Disability-Adjusted Life Years)	140	Bahrain	3	Both	22	All ages	1048	COVID-19	1	Number	2020	28608	32845.2	23848.6
2	DALYs (Disability-Adjusted Life Years)	58	Estonia	1	Male	22	All ages	1048	COVID-19	1	Number	2020	3687.01	9052.02	1894.78
2	DALYs (Disability-Adjusted Life Years)	58	Estonia	2	Female	22	All ages	1048	COVID-19	1	Number	2020	2626.25	6344.7	1327.24
2	DALYs (Disability-Adjusted Life Years)	58	Estonia	3	Both	22	All ages	1048	COVID-19	1	Number	2020	6313.26	15061.4	3374.7
2	DALYs (Disability-Adjusted Life Years)	116	Saint Lucia	1	Male	22	All ages	1048	COVID-19	1	Number	2020	540.76	935.408	237.98
2	DALYs (Disability-Adjusted Life Years)	116	Saint Lucia	2	Female	22	All ages	1048	COVID-19	1	Number	2020	298.705	515.801	132.363
2	DALYs (Disability-Adjusted Life Years)	116	Saint Lucia	3	Both	22	All ages	1048	COVID-19	1	Number	2020	839.465	1451.15	370.343
2	DALYs (Disability-Adjusted Life Years)	81	Germany	1	Male	22	All ages	1048	COVID-19	1	Number	2020	368663	409500	340900
2	DALYs (Disability-Adjusted Life Years)	81	Germany	2	Female	22	All ages	1048	COVID-19	1	Number	2020	229466	256005	211601
2	DALYs (Disability-Adjusted Life Years)	81	Germany	3	Both	22	All ages	1048	COVID-19	1	Number	2020	598129	664694	553030
2	DALYs (Disability-Adjusted Life Years)	139	Algeria	1	Male	22	All ages	1048	COVID-19	1	Number	2020	770483	787420	751004
2	DALYs (Disability-Adjusted Life Years)	139	Algeria	2	Female	22	All ages	1048	COVID-19	1	Number	2020	361101	377777	348948
2	DALYs (Disability-Adjusted Life Years)	139	Algeria	3	Both	22	All ages	1048	COVID-19	1	Number	2020	1.13158e+06	1.16209e+06	1.10007e+06
2	DALYs (Disability-Adjusted Life Years)	161	Bangladesh	1	Male	22	All ages	1048	COVID-19	1	Number	2020	2.13855e+06	2.87874e+06	1.81842e+06
2	DALYs (Disability-Adjusted Life Years)	161	Bangladesh	2	Female	22	All ages	1048	COVID-19	1	Number	2020	1.07869e+06	1.43596e+06	893684
2	DALYs (Disability-Adjusted Life Years)	161	Bangladesh	3	Both	22	All ages	1048	COVID-19	1	Number	2020	3.21724e+06	4.28634e+06	2.71284e+06
2	DALYs (Disability-Adjusted Life Years)	54	Slovakia	1	Male	22	All ages	1048	COVID-19	1	Number	2020	47629.8	76934.7	21781.2
2	DALYs (Disability-Adjusted Life Years)	54	Slovakia	2	Female	22	All ages	1048	COVID-19	1	Number	2020	32177	51992.9	16084.4
2	DALYs (Disability-Adjusted Life Years)	54	Slovakia	3	Both	22	All ages	1048	COVID-19	1	Number	2020	79806.8	126993	38447.4
2	DALYs (Disability-Adjusted Life Years)	128	Guatemala	1	Male	22	All ages	1048	COVID-19	1	Number	2020	229067	298971	163932
2	DALYs (Disability-Adjusted Life Years)	128	Guatemala	2	Female	22	All ages	1048	COVID-19	1	Number	2020	118477	160562	82703.2
2	DALYs (Disability-Adjusted Life Years)	128	Guatemala	3	Both	22	All ages	1048	COVID-19	1	Number	2020	347544	455959	248862
2	DALYs (Disability-Adjusted Life Years)	150	Oman	1	Male	22	All ages	1048	COVID-19	1	Number	2020	37706.1	42245.6	33595.9
2	DALYs (Disability-Adjusted Life Years)	150	Oman	2	Female	22	All ages	1048	COVID-19	1	Number	2020	19442.2	22391.4	17174.5
2	DALYs (Disability-Adjusted Life Years)	150	Oman	3	Both	22	All ages	1048	COVID-19	1	Number	2020	57148.4	64158.2	50856.4
2	DALYs (Disability-Adjusted Life Years)	152	Saudi Arabia	1	Male	22	All ages	1048	COVID-19	1	Number	2020	333639	396924	260534
2	DALYs (Disability-Adjusted Life Years)	152	Saudi Arabia	2	Female	22	All ages	1048	COVID-19	1	Number	2020	113636	142701	86832.8
2	DALYs (Disability-Adjusted Life Years)	152	Saudi Arabia	3	Both	22	All ages	1048	COVID-19	1	Number	2020	447275	534784	346428
2	DALYs (Disability-Adjusted Life Years)	47	Czechia	1	Male	22	All ages	1048	COVID-19	1	Number	2020	151545	211311	100412
2	DALYs (Disability-Adjusted Life Years)	47	Czechia	2	Female	22	All ages	1048	COVID-19	1	Number	2020	96673.3	132927	65444.8
2	DALYs (Disability-Adjusted Life Years)	47	Czechia	3	Both	22	All ages	1048	COVID-19	1	Number	2020	248219	342874	165679
2	DALYs (Disability-Adjusted Life Years)	125	Colombia	1	Male	22	All ages	1048	COVID-19	1	Number	2020	744657	929301	571278
2	DALYs (Disability-Adjusted Life Years)	125	Colombia	2	Female	22	All ages	1048	COVID-19	1	Number	2020	376969	473995	274233
2	DALYs (Disability-Adjusted Life Years)	125	Colombia	3	Both	22	All ages	1048	COVID-19	1	Number	2020	1.12163e+06	1.38237e+06	858542
2	DALYs (Disability-Adjusted Life Years)	13	Malaysia	1	Male	22	All ages	1048	COVID-19	1	Number	2020	11606.3	18027.1	6523.96
2	DALYs (Disability-Adjusted Life Years)	13	Malaysia	2	Female	22	All ages	1048	COVID-19	1	Number	2020	6453.91	9662.73	3613
2	DALYs (Disability-Adjusted Life Years)	13	Malaysia	3	Both	22	All ages	1048	COVID-19	1	Number	2020	18060.2	27311	10156.7
2	DALYs (Disability-Adjusted Life Years)	162	Bhutan	1	Male	22	All ages	1048	COVID-19	1	Number	2020	7.8828	20.6186	2.29219
2	DALYs (Disability-Adjusted Life Years)	162	Bhutan	2	Female	22	All ages	1048	COVID-19	1	Number	2020	11.396	30.5036	2.83335
2	DALYs (Disability-Adjusted Life Years)	162	Bhutan	3	Both	22	All ages	1048	COVID-19	1	Number	2020	19.2788	51.3791	5.18848
2	DALYs (Disability-Adjusted Life Years)	69	Singapore	1	Male	22	All ages	1048	COVID-19	1	Number	2020	724.221	1153.43	536.125
2	DALYs (Disability-Adjusted Life Years)	69	Singapore	2	Female	22	All ages	1048	COVID-19	1	Number	2020	671.743	1329.81	363.72
2	DALYs (Disability-Adjusted Life Years)	69	Singapore	3	Both	22	All ages	1048	COVID-19	1	Number	2020	1395.96	2514.38	899.037
2	DALYs (Disability-Adjusted Life Years)	46	Croatia	1	Male	22	All ages	1048	COVID-19	1	Number	2020	47251.8	66955.6	30782.5
2	DALYs (Disability-Adjusted Life Years)	46	Croatia	2	Female	22	All ages	1048	COVID-19	1	Number	2020	32953.6	46178.4	22115.5
2	DALYs (Disability-Adjusted Life Years)	46	Croatia	3	Both	22	All ages	1048	COVID-19	1	Number	2020	80205.3	112992	52976.2
2	DALYs (Disability-Adjusted Life Years)	93	Sweden	1	Male	22	All ages	1048	COVID-19	1	Number	2020	83696.4	94459.7	73279.5
2	DALYs (Disability-Adjusted Life Years)	93	Sweden	2	Female	22	All ages	1048	COVID-19	1	Number	2020	59205.9	67718.3	51703.1
2	DALYs (Disability-Adjusted Life Years)	93	Sweden	3	Both	22	All ages	1048	COVID-19	1	Number	2020	142902	157364	128540
2	DALYs (Disability-Adjusted Life Years)	59	Latvia	1	Male	22	All ages	1048	COVID-19	1	Number	2020	10792	22493.4	5542.53
2	DALYs (Disability-Adjusted Life Years)	59	Latvia	2	Female	22	All ages	1048	COVID-19	1	Number	2020	8163.24	16942.6	4185.88
2	DALYs (Disability-Adjusted Life Years)	59	Latvia	3	Both	22	All ages	1048	COVID-19	1	Number	2020	18955.2	39539.7	9735.58
2	DALYs (Disability-Adjusted Life Years)	106	Bahamas	1	Male	22	All ages	1048	COVID-19	1	Number	2020	6556.87	9574.92	3040.61
2	DALYs (Disability-Adjusted Life Years)	106	Bahamas	2	Female	22	All ages	1048	COVID-19	1	Number	2020	3823.15	5557.93	1792.29
2	DALYs (Disability-Adjusted Life Years)	106	Bahamas	3	Both	22	All ages	1048	COVID-19	1	Number	2020	10380	15116.5	4834.26
2	DALYs (Disability-Adjusted Life Years)	176	Comoros	1	Male	22	All ages	1048	COVID-19	1	Number	2020	4910.66	5460.6	4508.38
2	DALYs (Disability-Adjusted Life Years)	176	Comoros	2	Female	22	All ages	1048	COVID-19	1	Number	2020	2867.18	3345.57	2563.31
2	DALYs (Disability-Adjusted Life Years)	176	Comoros	3	Both	22	All ages	1048	COVID-19	1	Number	2020	7777.84	8714.92	7066.18
2	DALYs (Disability-Adjusted Life Years)	82	Greece	1	Male	22	All ages	1048	COVID-19	1	Number	2020	53419.9	56632.5	50186.5
2	DALYs (Disability-Adjusted Life Years)	82	Greece	2	Female	22	All ages	1048	COVID-19	1	Number	2020	32605.6	34672.5	30725.9
2	DALYs (Disability-Adjusted Life Years)	82	Greece	3	Both	22	All ages	1048	COVID-19	1	Number	2020	86025.6	90713.4	81485
2	DALYs (Disability-Adjusted Life Years)	127	El Salvador	1	Male	22	All ages	1048	COVID-19	1	Number	2020	58933.1	69003.5	48643.1
2	DALYs (Disability-Adjusted Life Years)	127	El Salvador	2	Female	22	All ages	1048	COVID-19	1	Number	2020	41601.9	48659.6	34849
2	DALYs (Disability-Adjusted Life Years)	127	El Salvador	3	Both	22	All ages	1048	COVID-19	1	Number	2020	100535	117751	83715.6
2	DALYs (Disability-Adjusted Life Years)	18	Thailand	1	Male	22	All ages	1048	COVID-19	1	Number	2020	8575.82	17415	2059.4
2	DALYs (Disability-Adjusted Life Years)	18	Thailand	2	Female	22	All ages	1048	COVID-19	1	Number	2020	5797.84	11582.1	1491.32
2	DALYs (Disability-Adjusted Life Years)	18	Thailand	3	Both	22	All ages	1048	COVID-19	1	Number	2020	14373.7	28988.9	3544.05
2	DALYs (Disability-Adjusted Life Years)	113	Guyana	1	Male	22	All ages	1048	COVID-19	1	Number	2020	10435.9	18172	4557.53
2	DALYs (Disability-Adjusted Life Years)	113	Guyana	2	Female	22	All ages	1048	COVID-19	1	Number	2020	5736.36	9951.63	2515.81
2	DALYs (Disability-Adjusted Life Years)	113	Guyana	3	Both	22	All ages	1048	COVID-19	1	Number	2020	16172.3	28123.7	7088.89
2	DALYs (Disability-Adjusted Life Years)	201	Burkina Faso	1	Male	22	All ages	1048	COVID-19	1	Number	2020	233156	254615	208156
2	DALYs (Disability-Adjusted Life Years)	201	Burkina Faso	2	Female	22	All ages	1048	COVID-19	1	Number	2020	136425	158216	118967
2	DALYs (Disability-Adjusted Life Years)	201	Burkina Faso	3	Both	22	All ages	1048	COVID-19	1	Number	2020	369580	408886	327712
2	DALYs (Disability-Adjusted Life Years)	83	Iceland	1	Male	22	All ages	1048	COVID-19	1	Number	2020	443.429	534.505	360.045
2	DALYs (Disability-Adjusted Life Years)	83	Iceland	2	Female	22	All ages	1048	COVID-19	1	Number	2020	292.401	372.048	248.735
2	DALYs (Disability-Adjusted Life Years)	83	Iceland	3	Both	22	All ages	1048	COVID-19	1	Number	2020	735.831	880.594	615.79
2	DALYs (Disability-Adjusted Life Years)	119	Trinidad and Tobago	1	Male	22	All ages	1048	COVID-19	1	Number	2020	9967.77	17244.8	4283.33
2	DALYs (Disability-Adjusted Life Years)	119	Trinidad and Tobago	2	Female	22	All ages	1048	COVID-19	1	Number	2020	5382.23	9322.91	2386.13
2	DALYs (Disability-Adjusted Life Years)	119	Trinidad and Tobago	3	Both	22	All ages	1048	COVID-19	1	Number	2020	15350	26567.7	6699.28
2	DALYs (Disability-Adjusted Life Years)	213	Niger	1	Male	22	All ages	1048	COVID-19	1	Number	2020	221879	252430	197796
2	DALYs (Disability-Adjusted Life Years)	213	Niger	2	Female	22	All ages	1048	COVID-19	1	Number	2020	124965	145716	109959
2	DALYs (Disability-Adjusted Life Years)	213	Niger	3	Both	22	All ages	1048	COVID-19	1	Number	2020	346844	397560	308268
2	DALYs (Disability-Adjusted Life Years)	14	Maldives	1	Male	22	All ages	1048	COVID-19	1	Number	2020	1109.34	1848.44	662.74
2	DALYs (Disability-Adjusted Life Years)	14	Maldives	2	Female	22	All ages	1048	COVID-19	1	Number	2020	494.801	831.63	313.521
2	DALYs (Disability-Adjusted Life Years)	14	Maldives	3	Both	22	All ages	1048	COVID-19	1	Number	2020	1604.14	2643.59	979.065
2	DALYs (Disability-Adjusted Life Years)	94	Switzerland	1	Male	22	All ages	1048	COVID-19	1	Number	2020	77552.4	83500.7	72405
2	DALYs (Disability-Adjusted Life Years)	94	Switzerland	2	Female	22	All ages	1048	COVID-19	1	Number	2020	46722.7	50233.8	43182.5
2	DALYs (Disability-Adjusted Life Years)	94	Switzerland	3	Both	22	All ages	1048	COVID-19	1	Number	2020	124275	132635	116443
2	DALYs (Disability-Adjusted Life Years)	189	United Republic of Tanzania	1	Male	22	All ages	1048	COVID-19	1	Number	2020	586910	634479	544648
2	DALYs (Disability-Adjusted Life Years)	189	United Republic of Tanzania	2	Female	22	All ages	1048	COVID-19	1	Number	2020	334318	372485	305793
2	DALYs (Disability-Adjusted Life Years)	189	United Republic of Tanzania	3	Both	22	All ages	1048	COVID-19	1	Number	2020	921228	1.0029e+06	848064
2	DALYs (Disability-Adjusted Life Years)	178	Eritrea	1	Male	22	All ages	1048	COVID-19	1	Number	2020	15058	29361.3	11327.3
2	DALYs (Disability-Adjusted Life Years)	178	Eritrea	2	Female	22	All ages	1048	COVID-19	1	Number	2020	9209.86	17736.1	6991.7
2	DALYs (Disability-Adjusted Life Years)	178	Eritrea	3	Both	22	All ages	1048	COVID-19	1	Number	2020	24267.9	47097.4	18404.3
2	DALYs (Disability-Adjusted Life Years)	141	Egypt	1	Male	22	All ages	1048	COVID-19	1	Number	2020	1.51291e+06	1.96426e+06	1.06647e+06
2	DALYs (Disability-Adjusted Life Years)	141	Egypt	2	Female	22	All ages	1048	COVID-19	1	Number	2020	687650	900303	473598
2	DALYs (Disability-Adjusted Life Years)	141	Egypt	3	Both	22	All ages	1048	COVID-19	1	Number	2020	2.20056e+06	2.87183e+06	1.54945e+06
2	DALYs (Disability-Adjusted Life Years)	95	United Kingdom	1	Male	22	All ages	1048	COVID-19	1	Number	2020	958158	1.0096e+06	906018
2	DALYs (Disability-Adjusted Life Years)	95	United Kingdom	2	Female	22	All ages	1048	COVID-19	1	Number	2020	632063	669134	592032
2	DALYs (Disability-Adjusted Life Years)	95	United Kingdom	3	Both	22	All ages	1048	COVID-19	1	Number	2020	1.59022e+06	1.65852e+06	1.52301e+06
2	DALYs (Disability-Adjusted Life Years)	153	Syrian Arab Republic	1	Male	22	All ages	1048	COVID-19	1	Number	2020	99941.2	122148	74765.5
2	DALYs (Disability-Adjusted Life Years)	153	Syrian Arab Republic	2	Female	22	All ages	1048	COVID-19	1	Number	2020	47531.6	57666.9	35632.5
2	DALYs (Disability-Adjusted Life Years)	153	Syrian Arab Republic	3	Both	22	All ages	1048	COVID-19	1	Number	2020	147473	179687	110361
2	DALYs (Disability-Adjusted Life Years)	26	Papua New Guinea	1	Male	22	All ages	1048	COVID-19	1	Number	2020	19016.4	42119.4	3511.81
2	DALYs (Disability-Adjusted Life Years)	26	Papua New Guinea	2	Female	22	All ages	1048	COVID-19	1	Number	2020	9637.62	21257.4	1970.47
2	DALYs (Disability-Adjusted Life Years)	26	Papua New Guinea	3	Both	22	All ages	1048	COVID-19	1	Number	2020	28654	63376.8	5417.92
2	DALYs (Disability-Adjusted Life Years)	108	Belize	1	Male	22	All ages	1048	COVID-19	1	Number	2020	4517.46	5588.81	3579.54
2	DALYs (Disability-Adjusted Life Years)	108	Belize	2	Female	22	All ages	1048	COVID-19	1	Number	2020	2060.23	2476.83	1656.75
2	DALYs (Disability-Adjusted Life Years)	108	Belize	3	Both	22	All ages	1048	COVID-19	1	Number	2020	6577.68	7914.24	5346.14
2	DALYs (Disability-Adjusted Life Years)	145	Kuwait	1	Male	22	All ages	1048	COVID-19	1	Number	2020	48067.7	62388.4	33694
2	DALYs (Disability-Adjusted Life Years)	145	Kuwait	2	Female	22	All ages	1048	COVID-19	1	Number	2020	13598.9	18199.6	10023.9
2	DALYs (Disability-Adjusted Life Years)	145	Kuwait	3	Both	22	All ages	1048	COVID-19	1	Number	2020	61666.6	78229.9	45025.2
2	DALYs (Disability-Adjusted Life Years)	121	Bolivia (Plurinational State of)	1	Male	22	All ages	1048	COVID-19	1	Number	2020	553681	629792	463007
2	DALYs (Disability-Adjusted Life Years)	121	Bolivia (Plurinational State of)	2	Female	22	All ages	1048	COVID-19	1	Number	2020	301074	343811	249596
2	DALYs (Disability-Adjusted Life Years)	121	Bolivia (Plurinational State of)	3	Both	22	All ages	1048	COVID-19	1	Number	2020	854755	969605	711328
2	DALYs (Disability-Adjusted Life Years)	215	Sao Tome and Principe	1	Male	22	All ages	1048	COVID-19	1	Number	2020	1470.02	1705.27	1310.85
2	DALYs (Disability-Adjusted Life Years)	215	Sao Tome and Principe	2	Female	22	All ages	1048	COVID-19	1	Number	2020	876.88	1163.38	730.917
2	DALYs (Disability-Adjusted Life Years)	215	Sao Tome and Principe	3	Both	22	All ages	1048	COVID-19	1	Number	2020	2346.9	2854.12	2055.32
2	DALYs (Disability-Adjusted Life Years)	173	Gabon	1	Male	22	All ages	1048	COVID-19	1	Number	2020	31626	34320	28782.6
2	DALYs (Disability-Adjusted Life Years)	173	Gabon	2	Female	22	All ages	1048	COVID-19	1	Number	2020	17664.1	20137.4	15764.5
2	DALYs (Disability-Adjusted Life Years)	173	Gabon	3	Both	22	All ages	1048	COVID-19	1	Number	2020	49290	54011.6	44483.6
2	DALYs (Disability-Adjusted Life Years)	203	Cabo Verde	1	Male	22	All ages	1048	COVID-19	1	Number	2020	2471.32	3457.94	1803.6
2	DALYs (Disability-Adjusted Life Years)	203	Cabo Verde	2	Female	22	All ages	1048	COVID-19	1	Number	2020	1676.59	2373.85	1156.16
2	DALYs (Disability-Adjusted Life Years)	203	Cabo Verde	3	Both	22	All ages	1048	COVID-19	1	Number	2020	4147.91	5880.36	2959.87
2	DALYs (Disability-Adjusted Life Years)	191	Zambia	1	Male	22	All ages	1048	COVID-19	1	Number	2020	246381	279430	215432
2	DALYs (Disability-Adjusted Life Years)	191	Zambia	2	Female	22	All ages	1048	COVID-19	1	Number	2020	132235	151593	114979
2	DALYs (Disability-Adjusted Life Years)	191	Zambia	3	Both	22	All ages	1048	COVID-19	1	Number	2020	378616	431267	330543
2	DALYs (Disability-Adjusted Life Years)	133	Venezuela (Bolivarian Republic of)	1	Male	22	All ages	1048	COVID-19	1	Number	2020	719232	779679	654046
2	DALYs (Disability-Adjusted Life Years)	133	Venezuela (Bolivarian Republic of)	2	Female	22	All ages	1048	COVID-19	1	Number	2020	418791	453392	380213
2	DALYs (Disability-Adjusted Life Years)	133	Venezuela (Bolivarian Republic of)	3	Both	22	All ages	1048	COVID-19	1	Number	2020	1.13802e+06	1.23332e+06	1.03394e+06
2	DALYs (Disability-Adjusted Life Years)	186	Seychelles	1	Male	22	All ages	1048	COVID-19	1	Number	2020	1.55675	4.23782	0.482765
2	DALYs (Disability-Adjusted Life Years)	186	Seychelles	2	Female	22	All ages	1048	COVID-19	1	Number	2020	2.15363	5.69458	0.598155
2	DALYs (Disability-Adjusted Life Years)	186	Seychelles	3	Both	22	All ages	1048	COVID-19	1	Number	2020	3.71038	9.9956	1.08466
2	DALYs (Disability-Adjusted Life Years)	157	Yemen	1	Male	22	All ages	1048	COVID-19	1	Number	2020	308405	358331	244619
2	DALYs (Disability-Adjusted Life Years)	157	Yemen	2	Female	22	All ages	1048	COVID-19	1	Number	2020	164341	195338	129181
2	DALYs (Disability-Adjusted Life Years)	157	Yemen	3	Both	22	All ages	1048	COVID-19	1	Number	2020	472746	548232	373978
2	DALYs (Disability-Adjusted Life Years)	78	Denmark	1	Male	22	All ages	1048	COVID-19	1	Number	2020	12221.8	13279.4	11164
2	DALYs (Disability-Adjusted Life Years)	78	Denmark	2	Female	22	All ages	1048	COVID-19	1	Number	2020	8961.28	9870.8	8210.98
2	DALYs (Disability-Adjusted Life Years)	78	Denmark	3	Both	22	All ages	1048	COVID-19	1	Number	2020	21183.1	22948.9	19582.3
2	DALYs (Disability-Adjusted Life Years)	155	Turkey	1	Male	22	All ages	1048	COVID-19	1	Number	2020	1.4296e+06	1.72004e+06	1.0863e+06
2	DALYs (Disability-Adjusted Life Years)	155	Turkey	2	Female	22	All ages	1048	COVID-19	1	Number	2020	795262	960563	604708
2	DALYs (Disability-Adjusted Life Years)	155	Turkey	3	Both	22	All ages	1048	COVID-19	1	Number	2020	2.22486e+06	2.6724e+06	1.69701e+06
2	DALYs (Disability-Adjusted Life Years)	15	Myanmar	1	Male	22	All ages	1048	COVID-19	1	Number	2020	209606	417345	84321.2
2	DALYs (Disability-Adjusted Life Years)	15	Myanmar	2	Female	22	All ages	1048	COVID-19	1	Number	2020	133383	262129	55782.4
2	DALYs (Disability-Adjusted Life Years)	15	Myanmar	3	Both	22	All ages	1048	COVID-19	1	Number	2020	342988	679474	139275
2	DALYs (Disability-Adjusted Life Years)	198	Zimbabwe	1	Male	22	All ages	1048	COVID-19	1	Number	2020	254166	284210	217930
2	DALYs (Disability-Adjusted Life Years)	198	Zimbabwe	2	Female	22	All ages	1048	COVID-19	1	Number	2020	159181	177497	136495
2	DALYs (Disability-Adjusted Life Years)	198	Zimbabwe	3	Both	22	All ages	1048	COVID-19	1	Number	2020	413347	461559	353836
2	DALYs (Disability-Adjusted Life Years)	143	Iraq	1	Male	22	All ages	1048	COVID-19	1	Number	2020	975816	1.13733e+06	825813
2	DALYs (Disability-Adjusted Life Years)	143	Iraq	2	Female	22	All ages	1048	COVID-19	1	Number	2020	494488	593367	410201
2	DALYs (Disability-Adjusted Life Years)	143	Iraq	3	Both	22	All ages	1048	COVID-19	1	Number	2020	1.4703e+06	1.72451e+06	1.24041e+06
2	DALYs (Disability-Adjusted Life Years)	146	Lebanon	1	Male	22	All ages	1048	COVID-19	1	Number	2020	89799.6	103801	77088.9
2	DALYs (Disability-Adjusted Life Years)	146	Lebanon	2	Female	22	All ages	1048	COVID-19	1	Number	2020	52000.1	60275	44532.9
2	DALYs (Disability-Adjusted Life Years)	146	Lebanon	3	Both	22	All ages	1048	COVID-19	1	Number	2020	141800	163695	121652
2	DALYs (Disability-Adjusted Life Years)	185	Rwanda	1	Male	22	All ages	1048	COVID-19	1	Number	2020	34096	40315.2	22408.8
2	DALYs (Disability-Adjusted Life Years)	185	Rwanda	2	Female	22	All ages	1048	COVID-19	1	Number	2020	22388.7	26820.3	14845.5
2	DALYs (Disability-Adjusted Life Years)	185	Rwanda	3	Both	22	All ages	1048	COVID-19	1	Number	2020	56484.6	67314.3	37162.5
2	DALYs (Disability-Adjusted Life Years)	165	Pakistan	1	Male	22	All ages	1048	COVID-19	1	Number	2020	4.19349e+06	4.50577e+06	3.89227e+06
2	DALYs (Disability-Adjusted Life Years)	165	Pakistan	2	Female	22	All ages	1048	COVID-19	1	Number	2020	2.00803e+06	2.24931e+06	1.82196e+06
2	DALYs (Disability-Adjusted Life Years)	165	Pakistan	3	Both	22	All ages	1048	COVID-19	1	Number	2020	6.20151e+06	6.75218e+06	5.72212e+06
2	DALYs (Disability-Adjusted Life Years)	20	Viet Nam	1	Male	22	All ages	1048	COVID-19	1	Number	2020	8239.98	15706.2	1994.65
2	DALYs (Disability-Adjusted Life Years)	20	Viet Nam	2	Female	22	All ages	1048	COVID-19	1	Number	2020	5431.74	10286.6	1345.24
2	DALYs (Disability-Adjusted Life Years)	20	Viet Nam	3	Both	22	All ages	1048	COVID-19	1	Number	2020	13671.7	25992.7	3339.99
2	DALYs (Disability-Adjusted Life Years)	163	India	1	Male	22	All ages	1048	COVID-19	1	Number	2020	1.70469e+07	1.82068e+07	1.5883e+07
2	DALYs (Disability-Adjusted Life Years)	163	India	2	Female	22	All ages	1048	COVID-19	1	Number	2020	9.12257e+06	1.03449e+07	8.33944e+06
2	DALYs (Disability-Adjusted Life Years)	163	India	3	Both	22	All ages	1048	COVID-19	1	Number	2020	2.61695e+07	2.83843e+07	2.42564e+07
2	DALYs (Disability-Adjusted Life Years)	151	Qatar	1	Male	22	All ages	1048	COVID-19	1	Number	2020	15290	20481.3	10800.1
2	DALYs (Disability-Adjusted Life Years)	151	Qatar	2	Female	22	All ages	1048	COVID-19	1	Number	2020	3767.27	5989.39	2393.76
2	DALYs (Disability-Adjusted Life Years)	151	Qatar	3	Both	22	All ages	1048	COVID-19	1	Number	2020	19057.2	26107.6	13365.3
2	DALYs (Disability-Adjusted Life Years)	367	Monaco	1	Male	22	All ages	1048	COVID-19	1	Number	2020	101.703	323.299	31.9714
2	DALYs (Disability-Adjusted Life Years)	367	Monaco	2	Female	22	All ages	1048	COVID-19	1	Number	2020	65.8056	203.958	20.8623
2	DALYs (Disability-Adjusted Life Years)	367	Monaco	3	Both	22	All ages	1048	COVID-19	1	Number	2020	167.508	527.359	52.8517
2	DALYs (Disability-Adjusted Life Years)	170	Congo	1	Male	22	All ages	1048	COVID-19	1	Number	2020	85692.4	96317	68202.9
2	DALYs (Disability-Adjusted Life Years)	170	Congo	2	Female	22	All ages	1048	COVID-19	1	Number	2020	45198.6	53216.1	36452.1
2	DALYs (Disability-Adjusted Life Years)	170	Congo	3	Both	22	All ages	1048	COVID-19	1	Number	2020	130891	148743	104398
2	DALYs (Disability-Adjusted Life Years)	172	Equatorial Guinea	1	Male	22	All ages	1048	COVID-19	1	Number	2020	24201	31544.4	18584.4
2	DALYs (Disability-Adjusted Life Years)	172	Equatorial Guinea	2	Female	22	All ages	1048	COVID-19	1	Number	2020	14538.5	19281.1	11023
2	DALYs (Disability-Adjusted Life Years)	172	Equatorial Guinea	3	Both	22	All ages	1048	COVID-19	1	Number	2020	38739.5	50461.3	29689.4
2	DALYs (Disability-Adjusted Life Years)	211	Mali	1	Male	22	All ages	1048	COVID-19	1	Number	2020	341300	375917	304747
2	DALYs (Disability-Adjusted Life Years)	211	Mali	2	Female	22	All ages	1048	COVID-19	1	Number	2020	175785	205553	153105
2	DALYs (Disability-Adjusted Life Years)	211	Mali	3	Both	22	All ages	1048	COVID-19	1	Number	2020	517086	579829	461348
2	DALYs (Disability-Adjusted Life Years)	149	Palestine	1	Male	22	All ages	1048	COVID-19	1	Number	2020	28332.5	30598.7	27376.7
2	DALYs (Disability-Adjusted Life Years)	149	Palestine	2	Female	22	All ages	1048	COVID-19	1	Number	2020	15617.4	18391.8	14222.5
2	DALYs (Disability-Adjusted Life Years)	149	Palestine	3	Both	22	All ages	1048	COVID-19	1	Number	2020	43950	48988.1	41625.9
2	DALYs (Disability-Adjusted Life Years)	50	Montenegro	1	Male	22	All ages	1048	COVID-19	1	Number	2020	11882.8	15760.7	8740.05
2	DALYs (Disability-Adjusted Life Years)	50	Montenegro	2	Female	22	All ages	1048	COVID-19	1	Number	2020	6317.28	7932.58	5054.51
2	DALYs (Disability-Adjusted Life Years)	50	Montenegro	3	Both	22	All ages	1048	COVID-19	1	Number	2020	18200.1	22842.2	14148.3
2	DALYs (Disability-Adjusted Life Years)	177	Djibouti	1	Male	22	All ages	1048	COVID-19	1	Number	2020	26252.7	31528.8	20352.7
2	DALYs (Disability-Adjusted Life Years)	177	Djibouti	2	Female	22	All ages	1048	COVID-19	1	Number	2020	11369.6	13610.7	8896.91
2	DALYs (Disability-Adjusted Life Years)	177	Djibouti	3	Both	22	All ages	1048	COVID-19	1	Number	2020	37622.3	44976.5	29159.8
2	DALYs (Disability-Adjusted Life Years)	190	Uganda	1	Male	22	All ages	1048	COVID-19	1	Number	2020	244082	282625	159569
2	DALYs (Disability-Adjusted Life Years)	190	Uganda	2	Female	22	All ages	1048	COVID-19	1	Number	2020	153171	178374	102553
2	DALYs (Disability-Adjusted Life Years)	190	Uganda	3	Both	22	All ages	1048	COVID-19	1	Number	2020	397253	461031	261293
2	DALYs (Disability-Adjusted Life Years)	202	Cameroon	1	Male	22	All ages	1048	COVID-19	1	Number	2020	264810	287621	242454
2	DALYs (Disability-Adjusted Life Years)	202	Cameroon	2	Female	22	All ages	1048	COVID-19	1	Number	2020	147405	173720	130390
2	DALYs (Disability-Adjusted Life Years)	202	Cameroon	3	Both	22	All ages	1048	COVID-19	1	Number	2020	412215	459914	373385
2	DALYs (Disability-Adjusted Life Years)	214	Nigeria	1	Male	22	All ages	1048	COVID-19	1	Number	2020	1.7628e+06	1.96834e+06	1.5945e+06
2	DALYs (Disability-Adjusted Life Years)	214	Nigeria	2	Female	22	All ages	1048	COVID-19	1	Number	2020	1.09584e+06	1.3811e+06	929999
2	DALYs (Disability-Adjusted Life Years)	214	Nigeria	3	Both	22	All ages	1048	COVID-19	1	Number	2020	2.85864e+06	3.34883e+06	2.52395e+06
2	DALYs (Disability-Adjusted Life Years)	90	Norway	1	Male	22	All ages	1048	COVID-19	1	Number	2020	4955.68	5589.27	4416.72
2	DALYs (Disability-Adjusted Life Years)	90	Norway	2	Female	22	All ages	1048	COVID-19	1	Number	2020	3648.02	4286.65	3195.27
2	DALYs (Disability-Adjusted Life Years)	90	Norway	3	Both	22	All ages	1048	COVID-19	1	Number	2020	8603.7	9745.73	7829.56
2	DALYs (Disability-Adjusted Life Years)	44	Bosnia and Herzegovina	1	Male	22	All ages	1048	COVID-19	1	Number	2020	59242.8	84129.1	38032.7
2	DALYs (Disability-Adjusted Life Years)	44	Bosnia and Herzegovina	2	Female	22	All ages	1048	COVID-19	1	Number	2020	35547.7	50130.7	22741.1
2	DALYs (Disability-Adjusted Life Years)	44	Bosnia and Herzegovina	3	Both	22	All ages	1048	COVID-19	1	Number	2020	94790.4	133273	61072.6
2	DALYs (Disability-Adjusted Life Years)	210	Liberia	1	Male	22	All ages	1048	COVID-19	1	Number	2020	58166.8	71025.4	50478.8
2	DALYs (Disability-Adjusted Life Years)	210	Liberia	2	Female	22	All ages	1048	COVID-19	1	Number	2020	29458.5	37548.9	24712
2	DALYs (Disability-Adjusted Life Years)	210	Liberia	3	Both	22	All ages	1048	COVID-19	1	Number	2020	87625.3	107831	75387.6
2	DALYs (Disability-Adjusted Life Years)	68	Republic of Korea	1	Male	22	All ages	1048	COVID-19	1	Number	2020	14230.8	22370.4	9283.95
2	DALYs (Disability-Adjusted Life Years)	68	Republic of Korea	2	Female	22	All ages	1048	COVID-19	1	Number	2020	8568.03	13403.9	5628.77
2	DALYs (Disability-Adjusted Life Years)	68	Republic of Korea	3	Both	22	All ages	1048	COVID-19	1	Number	2020	22798.8	35600.9	15064.6
2	DALYs (Disability-Adjusted Life Years)	142	Iran (Islamic Republic of)	1	Male	22	All ages	1048	COVID-19	1	Number	2020	704959	921340	504417
2	DALYs (Disability-Adjusted Life Years)	142	Iran (Islamic Republic of)	2	Female	22	All ages	1048	COVID-19	1	Number	2020	452690	588840	327144
2	DALYs (Disability-Adjusted Life Years)	142	Iran (Islamic Republic of)	3	Both	22	All ages	1048	COVID-19	1	Number	2020	1.15765e+06	1.43018e+06	902705
2	DALYs (Disability-Adjusted Life Years)	102	United States of America	1	Male	22	All ages	1048	COVID-19	1	Number	2020	5.96883e+06	6.21144e+06	5.74769e+06
2	DALYs (Disability-Adjusted Life Years)	102	United States of America	2	Female	22	All ages	1048	COVID-19	1	Number	2020	3.65119e+06	3.80747e+06	3.49928e+06
2	DALYs (Disability-Adjusted Life Years)	102	United States of America	3	Both	22	All ages	1048	COVID-19	1	Number	2020	9.62003e+06	1.00233e+07	9.24618e+06
2	DALYs (Disability-Adjusted Life Years)	34	Azerbaijan	1	Male	22	All ages	1048	COVID-19	1	Number	2020	235338	302904	167809
2	DALYs (Disability-Adjusted Life Years)	34	Azerbaijan	2	Female	22	All ages	1048	COVID-19	1	Number	2020	149569	192508	107651
2	DALYs (Disability-Adjusted Life Years)	34	Azerbaijan	3	Both	22	All ages	1048	COVID-19	1	Number	2020	384906	485982	282838
2	DALYs (Disability-Adjusted Life Years)	55	Slovenia	1	Male	22	All ages	1048	COVID-19	1	Number	2020	27905	38230.6	17567.7
2	DALYs (Disability-Adjusted Life Years)	55	Slovenia	2	Female	22	All ages	1048	COVID-19	1	Number	2020	19860.5	26265.1	13867.5
2	DALYs (Disability-Adjusted Life Years)	55	Slovenia	3	Both	22	All ages	1048	COVID-19	1	Number	2020	47765.5	63596.5	32035.9
2	DALYs (Disability-Adjusted Life Years)	182	Malawi	1	Male	22	All ages	1048	COVID-19	1	Number	2020	128704	145100	116826
2	DALYs (Disability-Adjusted Life Years)	182	Malawi	2	Female	22	All ages	1048	COVID-19	1	Number	2020	78147.5	88517.3	70266.4
2	DALYs (Disability-Adjusted Life Years)	182	Malawi	3	Both	22	All ages	1048	COVID-19	1	Number	2020	206852	232686	187063
2	DALYs (Disability-Adjusted Life Years)	349	Greenland	1	Male	22	All ages	1048	COVID-19	1	Number	2020	0.388856	1.03023	0.123792
2	DALYs (Disability-Adjusted Life Years)	349	Greenland	2	Female	22	All ages	1048	COVID-19	1	Number	2020	0.57184	1.50497	0.160924
2	DALYs (Disability-Adjusted Life Years)	349	Greenland	3	Both	22	All ages	1048	COVID-19	1	Number	2020	0.960696	2.51964	0.291837
2	DALYs (Disability-Adjusted Life Years)	195	Namibia	1	Male	22	All ages	1048	COVID-19	1	Number	2020	29068.6	33164.3	26036.3
2	DALYs (Disability-Adjusted Life Years)	195	Namibia	2	Female	22	All ages	1048	COVID-19	1	Number	2020	18202.3	20786.3	16277.6
2	DALYs (Disability-Adjusted Life Years)	195	Namibia	3	Both	22	All ages	1048	COVID-19	1	Number	2020	47270.8	53950.7	42338.1
2	DALYs (Disability-Adjusted Life Years)	413	Tokelau	1	Male	22	All ages	1048	COVID-19	1	Number	2020	1.29864e-07	1.29864e-07	1.29864e-07
2	DALYs (Disability-Adjusted Life Years)	413	Tokelau	2	Female	22	All ages	1048	COVID-19	1	Number	2020	1.29874e-07	1.29874e-07	1.29874e-07
2	DALYs (Disability-Adjusted Life Years)	413	Tokelau	3	Both	22	All ages	1048	COVID-19	1	Number	2020	2.59738e-07	2.59738e-07	2.59738e-07
2	DALYs (Disability-Adjusted Life Years)	522	Sudan	1	Male	22	All ages	1048	COVID-19	1	Number	2020	591773	724601	440719
2	DALYs (Disability-Adjusted Life Years)	522	Sudan	2	Female	22	All ages	1048	COVID-19	1	Number	2020	285894	361313	213167
2	DALYs (Disability-Adjusted Life Years)	522	Sudan	3	Both	22	All ages	1048	COVID-19	1	Number	2020	877668	1.08053e+06	661943
2	DALYs (Disability-Adjusted Life Years)	207	Ghana	1	Male	22	All ages	1048	COVID-19	1	Number	2020	277599	312100	249670
2	DALYs (Disability-Adjusted Life Years)	207	Ghana	2	Female	22	All ages	1048	COVID-19	1	Number	2020	175152	208502	151970
2	DALYs (Disability-Adjusted Life Years)	207	Ghana	3	Both	22	All ages	1048	COVID-19	1	Number	2020	452751	514791	402038
2	DALYs (Disability-Adjusted Life Years)	184	Mozambique	1	Male	22	All ages	1048	COVID-19	1	Number	2020	140467	204072	86277.8
2	DALYs (Disability-Adjusted Life Years)	184	Mozambique	2	Female	22	All ages	1048	COVID-19	1	Number	2020	88475.6	127110	55582.7
2	DALYs (Disability-Adjusted Life Years)	184	Mozambique	3	Both	22	All ages	1048	COVID-19	1	Number	2020	228943	330991	142344
2	DALYs (Disability-Adjusted Life Years)	197	Eswatini	1	Male	22	All ages	1048	COVID-19	1	Number	2020	36871.3	40994.4	33686.1
2	DALYs (Disability-Adjusted Life Years)	197	Eswatini	2	Female	22	All ages	1048	COVID-19	1	Number	2020	23770	26332	21667.6
2	DALYs (Disability-Adjusted Life Years)	197	Eswatini	3	Both	22	All ages	1048	COVID-19	1	Number	2020	60641.3	67325.1	55302.4
2	DALYs (Disability-Adjusted Life Years)	422	United States Virgin Islands	1	Male	22	All ages	1048	COVID-19	1	Number	2020	694.967	1116.05	335.327
2	DALYs (Disability-Adjusted Life Years)	422	United States Virgin Islands	2	Female	22	All ages	1048	COVID-19	1	Number	2020	303.097	477.635	148.271
2	DALYs (Disability-Adjusted Life Years)	422	United States Virgin Islands	3	Both	22	All ages	1048	COVID-19	1	Number	2020	998.064	1593.48	484.97
2	DALYs (Disability-Adjusted Life Years)	209	Guinea-Bissau	1	Male	22	All ages	1048	COVID-19	1	Number	2020	48567.7	55173.6	42485.7
2	DALYs (Disability-Adjusted Life Years)	209	Guinea-Bissau	2	Female	22	All ages	1048	COVID-19	1	Number	2020	28797.1	33177.9	24755.5
2	DALYs (Disability-Adjusted Life Years)	209	Guinea-Bissau	3	Both	22	All ages	1048	COVID-19	1	Number	2020	77364.8	87927.9	67271.2
2	DALYs (Disability-Adjusted Life Years)	374	Niue	1	Male	22	All ages	1048	COVID-19	1	Number	2020	1.29871e-07	1.29871e-07	1.29871e-07
2	DALYs (Disability-Adjusted Life Years)	374	Niue	2	Female	22	All ages	1048	COVID-19	1	Number	2020	1.29854e-07	1.29854e-07	1.29854e-07
2	DALYs (Disability-Adjusted Life Years)	374	Niue	3	Both	22	All ages	1048	COVID-19	1	Number	2020	2.59725e-07	2.59725e-07	2.59725e-07
2	DALYs (Disability-Adjusted Life Years)	369	Nauru	1	Male	22	All ages	1048	COVID-19	1	Number	2020	0.589809	1.58662	0.201709
2	DALYs (Disability-Adjusted Life Years)	369	Nauru	2	Female	22	All ages	1048	COVID-19	1	Number	2020	0.871887	2.27415	0.269534
2	DALYs (Disability-Adjusted Life Years)	369	Nauru	3	Both	22	All ages	1048	COVID-19	1	Number	2020	1.4617	3.83959	0.477401
2	DALYs (Disability-Adjusted Life Years)	376	Northern Mariana Islands	1	Male	22	All ages	1048	COVID-19	1	Number	2020	71.8154	113.758	49.4227
2	DALYs (Disability-Adjusted Life Years)	376	Northern Mariana Islands	2	Female	22	All ages	1048	COVID-19	1	Number	2020	48.6118	59.0773	40.5114
2	DALYs (Disability-Adjusted Life Years)	376	Northern Mariana Islands	3	Both	22	All ages	1048	COVID-19	1	Number	2020	120.427	173.197	90.9806
2	DALYs (Disability-Adjusted Life Years)	164	Nepal	1	Male	22	All ages	1048	COVID-19	1	Number	2020	402151	438542	280715
2	DALYs (Disability-Adjusted Life Years)	164	Nepal	2	Female	22	All ages	1048	COVID-19	1	Number	2020	231108	258403	163306
2	DALYs (Disability-Adjusted Life Years)	164	Nepal	3	Both	22	All ages	1048	COVID-19	1	Number	2020	633259	695859	442147
2	DALYs (Disability-Adjusted Life Years)	416	Tuvalu	1	Male	22	All ages	1048	COVID-19	1	Number	2020	0.713776	1.80387	0.245974
2	DALYs (Disability-Adjusted Life Years)	416	Tuvalu	2	Female	22	All ages	1048	COVID-19	1	Number	2020	0.98871	2.43206	0.321422
2	DALYs (Disability-Adjusted Life Years)	416	Tuvalu	3	Both	22	All ages	1048	COVID-19	1	Number	2020	1.70249	4.24461	0.575275
2	DALYs (Disability-Adjusted Life Years)	74	Andorra	1	Male	22	All ages	1048	COVID-19	1	Number	2020	1186.18	2239.9	659.806
2	DALYs (Disability-Adjusted Life Years)	74	Andorra	2	Female	22	All ages	1048	COVID-19	1	Number	2020	553.857	980.903	331.989
2	DALYs (Disability-Adjusted Life Years)	74	Andorra	3	Both	22	All ages	1048	COVID-19	1	Number	2020	1740.03	3233.49	999.747
2	DALYs (Disability-Adjusted Life Years)	110	Dominica	1	Male	22	All ages	1048	COVID-19	1	Number	2020	0.758945	2.26645	0.161773
2	DALYs (Disability-Adjusted Life Years)	110	Dominica	2	Female	22	All ages	1048	COVID-19	1	Number	2020	1.21331	3.7175	0.232445
2	DALYs (Disability-Adjusted Life Years)	110	Dominica	3	Both	22	All ages	1048	COVID-19	1	Number	2020	1.97226	6.06655	0.392522
2	DALYs (Disability-Adjusted Life Years)	107	Barbados	1	Male	22	All ages	1048	COVID-19	1	Number	2020	114.38	119.822	111.856
2	DALYs (Disability-Adjusted Life Years)	107	Barbados	2	Female	22	All ages	1048	COVID-19	1	Number	2020	81.7751	92.166	77.0191
2	DALYs (Disability-Adjusted Life Years)	107	Barbados	3	Both	22	All ages	1048	COVID-19	1	Number	2020	196.155	211.668	188.927
2	DALYs (Disability-Adjusted Life Years)	62	Russian Federation	1	Male	22	All ages	1048	COVID-19	1	Number	2020	1.99291e+06	2.44168e+06	1.5553e+06
2	DALYs (Disability-Adjusted Life Years)	62	Russian Federation	2	Female	22	All ages	1048	COVID-19	1	Number	2020	1.65401e+06	1.98702e+06	1.32972e+06
2	DALYs (Disability-Adjusted Life Years)	62	Russian Federation	3	Both	22	All ages	1048	COVID-19	1	Number	2020	3.64693e+06	4.20003e+06	3.09574e+06
2	DALYs (Disability-Adjusted Life Years)	84	Ireland	1	Male	22	All ages	1048	COVID-19	1	Number	2020	24682.1	27190.1	22160.2
2	DALYs (Disability-Adjusted Life Years)	84	Ireland	2	Female	22	All ages	1048	COVID-19	1	Number	2020	15992.9	17704	14416.8
2	DALYs (Disability-Adjusted Life Years)	84	Ireland	3	Both	22	All ages	1048	COVID-19	1	Number	2020	40675.1	44594.5	36807.8
2	DALYs (Disability-Adjusted Life Years)	320	Cook Islands	1	Male	22	All ages	1048	COVID-19	1	Number	2020	1.12225	2.89071	0.403308
2	DALYs (Disability-Adjusted Life Years)	320	Cook Islands	2	Female	22	All ages	1048	COVID-19	1	Number	2020	1.81939	4.68951	0.585875
2	DALYs (Disability-Adjusted Life Years)	320	Cook Islands	3	Both	22	All ages	1048	COVID-19	1	Number	2020	2.94163	7.63352	0.99295
2	DALYs (Disability-Adjusted Life Years)	130	Mexico	1	Male	22	All ages	1048	COVID-19	1	Number	2020	4.77605e+06	5.97162e+06	3.70363e+06
2	DALYs (Disability-Adjusted Life Years)	130	Mexico	2	Female	22	All ages	1048	COVID-19	1	Number	2020	2.64132e+06	3.33995e+06	1.95681e+06
2	DALYs (Disability-Adjusted Life Years)	130	Mexico	3	Both	22	All ages	1048	COVID-19	1	Number	2020	7.41736e+06	8.92369e+06	6.03822e+06
2	DALYs (Disability-Adjusted Life Years)	168	Angola	1	Male	22	All ages	1048	COVID-19	1	Number	2020	257921	298549	212448
2	DALYs (Disability-Adjusted Life Years)	168	Angola	2	Female	22	All ages	1048	COVID-19	1	Number	2020	158523	187548	130855
2	DALYs (Disability-Adjusted Life Years)	168	Angola	3	Both	22	All ages	1048	COVID-19	1	Number	2020	416444	484237	344478
2	DALYs (Disability-Adjusted Life Years)	175	Burundi	1	Male	22	All ages	1048	COVID-19	1	Number	2020	75407.6	83127.2	69397.9
2	DALYs (Disability-Adjusted Life Years)	175	Burundi	2	Female	22	All ages	1048	COVID-19	1	Number	2020	36222.1	39993.5	33189.5
2	DALYs (Disability-Adjusted Life Years)	175	Burundi	3	Both	22	All ages	1048	COVID-19	1	Number	2020	111630	123178	102605
2	DALYs (Disability-Adjusted Life Years)	187	Somalia	1	Male	22	All ages	1048	COVID-19	1	Number	2020	440572	525932	349369
2	DALYs (Disability-Adjusted Life Years)	187	Somalia	2	Female	22	All ages	1048	COVID-19	1	Number	2020	259409	312933	205793
2	DALYs (Disability-Adjusted Life Years)	187	Somalia	3	Both	22	All ages	1048	COVID-19	1	Number	2020	699981	837649	555173
2	DALYs (Disability-Adjusted Life Years)	298	American Samoa	1	Male	22	All ages	1048	COVID-19	1	Number	2020	0.167709	0.724485	0.00511578
2	DALYs (Disability-Adjusted Life Years)	298	American Samoa	2	Female	22	All ages	1048	COVID-19	1	Number	2020	0.242666	1.04692	0.0068688
2	DALYs (Disability-Adjusted Life Years)	298	American Samoa	3	Both	22	All ages	1048	COVID-19	1	Number	2020	0.410375	1.78102	0.0118799
2	DALYs (Disability-Adjusted Life Years)	71	Australia	1	Male	22	All ages	1048	COVID-19	1	Number	2020	9218.86	9755.69	8710.09
2	DALYs (Disability-Adjusted Life Years)	71	Australia	2	Female	22	All ages	1048	COVID-19	1	Number	2020	6314.88	6778.32	5947.8
2	DALYs (Disability-Adjusted Life Years)	71	Australia	3	Both	22	All ages	1048	COVID-19	1	Number	2020	15533.7	16390.2	14722.1
2	DALYs (Disability-Adjusted Life Years)	67	Japan	1	Male	22	All ages	1048	COVID-19	1	Number	2020	33388.7	38752.7	28901.1
2	DALYs (Disability-Adjusted Life Years)	67	Japan	2	Female	22	All ages	1048	COVID-19	1	Number	2020	24414.6	28940.4	20630.9
2	DALYs (Disability-Adjusted Life Years)	67	Japan	3	Both	22	All ages	1048	COVID-19	1	Number	2020	57803.2	66460.5	51187.2
2	DALYs (Disability-Adjusted Life Years)	200	Benin	1	Male	22	All ages	1048	COVID-19	1	Number	2020	60665.6	73202	45660.7
2	DALYs (Disability-Adjusted Life Years)	200	Benin	2	Female	22	All ages	1048	COVID-19	1	Number	2020	36083.5	43530.4	27488.4
2	DALYs (Disability-Adjusted Life Years)	200	Benin	3	Both	22	All ages	1048	COVID-19	1	Number	2020	96749.1	116445	73164.7
2	DALYs (Disability-Adjusted Life Years)	179	Ethiopia	1	Male	22	All ages	1048	COVID-19	1	Number	2020	1.18173e+06	1.28065e+06	1.09216e+06
2	DALYs (Disability-Adjusted Life Years)	179	Ethiopia	2	Female	22	All ages	1048	COVID-19	1	Number	2020	614883	709116	556602
2	DALYs (Disability-Adjusted Life Years)	179	Ethiopia	3	Both	22	All ages	1048	COVID-19	1	Number	2020	1.79661e+06	1.98125e+06	1.65544e+06
2	DALYs (Disability-Adjusted Life Years)	35	Georgia	1	Male	22	All ages	1048	COVID-19	1	Number	2020	55244.1	71023.7	38662.8
2	DALYs (Disability-Adjusted Life Years)	35	Georgia	2	Female	22	All ages	1048	COVID-19	1	Number	2020	46271.3	59072	32673.4
2	DALYs (Disability-Adjusted Life Years)	35	Georgia	3	Both	22	All ages	1048	COVID-19	1	Number	2020	101515	129662	72680.8
2	DALYs (Disability-Adjusted Life Years)	131	Nicaragua	1	Male	22	All ages	1048	COVID-19	1	Number	2020	145568	173278	117519
2	DALYs (Disability-Adjusted Life Years)	131	Nicaragua	2	Female	22	All ages	1048	COVID-19	1	Number	2020	80388	100624	62613.7
2	DALYs (Disability-Adjusted Life Years)	131	Nicaragua	3	Both	22	All ages	1048	COVID-19	1	Number	2020	225956	266733	184212
2	DALYs (Disability-Adjusted Life Years)	204	Chad	1	Male	22	All ages	1048	COVID-19	1	Number	2020	230406	277168	193563
2	DALYs (Disability-Adjusted Life Years)	204	Chad	2	Female	22	All ages	1048	COVID-19	1	Number	2020	114515	145779	93962.2
2	DALYs (Disability-Adjusted Life Years)	204	Chad	3	Both	22	All ages	1048	COVID-19	1	Number	2020	344921	423735	288931
2	DALYs (Disability-Adjusted Life Years)	118	Suriname	1	Male	22	All ages	1048	COVID-19	1	Number	2020	1814.35	1992.53	1750.52
2	DALYs (Disability-Adjusted Life Years)	118	Suriname	2	Female	22	All ages	1048	COVID-19	1	Number	2020	1152.76	1376.73	1055.43
2	DALYs (Disability-Adjusted Life Years)	118	Suriname	3	Both	22	All ages	1048	COVID-19	1	Number	2020	2967.11	3343.48	2806.55
2	DALYs (Disability-Adjusted Life Years)	305	Bermuda	1	Male	22	All ages	1048	COVID-19	1	Number	2020	132.143	167.347	101.429
2	DALYs (Disability-Adjusted Life Years)	305	Bermuda	2	Female	22	All ages	1048	COVID-19	1	Number	2020	95.6137	119.197	79.1303
2	DALYs (Disability-Adjusted Life Years)	305	Bermuda	3	Both	22	All ages	1048	COVID-19	1	Number	2020	227.757	282.433	183.801
2	DALYs (Disability-Adjusted Life Years)	435	South Sudan	1	Male	22	All ages	1048	COVID-19	1	Number	2020	164143	182289	141652
2	DALYs (Disability-Adjusted Life Years)	435	South Sudan	2	Female	22	All ages	1048	COVID-19	1	Number	2020	82264	92700.8	70189.9
2	DALYs (Disability-Adjusted Life Years)	435	South Sudan	3	Both	22	All ages	1048	COVID-19	1	Number	2020	246407	273701	211698
2	DALYs (Disability-Adjusted Life Years)	385	Puerto Rico	1	Male	22	All ages	1048	COVID-19	1	Number	2020	18852	29216.3	11262.6
2	DALYs (Disability-Adjusted Life Years)	385	Puerto Rico	2	Female	22	All ages	1048	COVID-19	1	Number	2020	11637.1	18063.9	7339.6
2	DALYs (Disability-Adjusted Life Years)	385	Puerto Rico	3	Both	22	All ages	1048	COVID-19	1	Number	2020	30489.2	47182.1	18852.3
2	DALYs (Disability-Adjusted Life Years)	154	Tunisia	1	Male	22	All ages	1048	COVID-19	1	Number	2020	99850.5	172897	74168.8
2	DALYs (Disability-Adjusted Life Years)	154	Tunisia	2	Female	22	All ages	1048	COVID-19	1	Number	2020	54088.3	91540.5	39225.2
2	DALYs (Disability-Adjusted Life Years)	154	Tunisia	3	Both	22	All ages	1048	COVID-19	1	Number	2020	153939	263919	113372
2	DALYs (Disability-Adjusted Life Years)	23	Kiribati	1	Male	22	All ages	1048	COVID-19	1	Number	2020	1.29933e-07	1.29933e-07	1.29933e-07
2	DALYs (Disability-Adjusted Life Years)	23	Kiribati	2	Female	22	All ages	1048	COVID-19	1	Number	2020	1.29907e-07	1.29907e-07	1.29907e-07
2	DALYs (Disability-Adjusted Life Years)	23	Kiribati	3	Both	22	All ages	1048	COVID-19	1	Number	2020	2.5984e-07	2.5984e-07	2.5984e-07
2	DALYs (Disability-Adjusted Life Years)	98	Chile	1	Male	22	All ages	1048	COVID-19	1	Number	2020	287061	301818	272451
2	DALYs (Disability-Adjusted Life Years)	98	Chile	2	Female	22	All ages	1048	COVID-19	1	Number	2020	166673	175785	157587
2	DALYs (Disability-Adjusted Life Years)	98	Chile	3	Both	22	All ages	1048	COVID-19	1	Number	2020	453734	475070	432662
2	DALYs (Disability-Adjusted Life Years)	61	Republic of Moldova	1	Male	22	All ages	1048	COVID-19	1	Number	2020	53194.4	69224.5	37967.5
2	DALYs (Disability-Adjusted Life Years)	61	Republic of Moldova	2	Female	22	All ages	1048	COVID-19	1	Number	2020	40722.5	52551.3	29112.8
2	DALYs (Disability-Adjusted Life Years)	61	Republic of Moldova	3	Both	22	All ages	1048	COVID-19	1	Number	2020	93916.9	120917	67859.2
2	DALYs (Disability-Adjusted Life Years)	80	France	1	Male	22	All ages	1048	COVID-19	1	Number	2020	598175	633923	562569
2	DALYs (Disability-Adjusted Life Years)	80	France	2	Female	22	All ages	1048	COVID-19	1	Number	2020	405827	439887	377757
2	DALYs (Disability-Adjusted Life Years)	80	France	3	Both	22	All ages	1048	COVID-19	1	Number	2020	1.004e+06	1.06872e+06	940387
2	DALYs (Disability-Adjusted Life Years)	22	Fiji	1	Male	22	All ages	1048	COVID-19	1	Number	2020	1375.24	2856.37	348.697
2	DALYs (Disability-Adjusted Life Years)	22	Fiji	2	Female	22	All ages	1048	COVID-19	1	Number	2020	767.674	1586.76	201.292
2	DALYs (Disability-Adjusted Life Years)	22	Fiji	3	Both	22	All ages	1048	COVID-19	1	Number	2020	2142.91	4443.12	549.989
2	DALYs (Disability-Adjusted Life Years)	144	Jordan	1	Male	22	All ages	1048	COVID-19	1	Number	2020	147639	189184	99827.6
2	DALYs (Disability-Adjusted Life Years)	144	Jordan	2	Female	22	All ages	1048	COVID-19	1	Number	2020	62680	79323.6	42870.7
2	DALYs (Disability-Adjusted Life Years)	144	Jordan	3	Both	22	All ages	1048	COVID-19	1	Number	2020	210319	268465	144014
2	DALYs (Disability-Adjusted Life Years)	194	Lesotho	1	Male	22	All ages	1048	COVID-19	1	Number	2020	43375.2	47849.4	38741.9
2	DALYs (Disability-Adjusted Life Years)	194	Lesotho	2	Female	22	All ages	1048	COVID-19	1	Number	2020	29772.9	32787	26633.6
2	DALYs (Disability-Adjusted Life Years)	194	Lesotho	3	Both	22	All ages	1048	COVID-19	1	Number	2020	73148.1	80619.5	65403.3
2	DALYs (Disability-Adjusted Life Years)	212	Mauritania	1	Male	22	All ages	1048	COVID-19	1	Number	2020	49275.5	57831.3	37533.4
2	DALYs (Disability-Adjusted Life Years)	212	Mauritania	2	Female	22	All ages	1048	COVID-19	1	Number	2020	26472.8	32515.7	19877.4
2	DALYs (Disability-Adjusted Life Years)	212	Mauritania	3	Both	22	All ages	1048	COVID-19	1	Number	2020	75748.3	90192.8	57369.5
2	DALYs (Disability-Adjusted Life Years)	39	Tajikistan	1	Male	22	All ages	1048	COVID-19	1	Number	2020	205055	244837	157452
2	DALYs (Disability-Adjusted Life Years)	39	Tajikistan	2	Female	22	All ages	1048	COVID-19	1	Number	2020	105716	126859	82386.6
2	DALYs (Disability-Adjusted Life Years)	39	Tajikistan	3	Both	22	All ages	1048	COVID-19	1	Number	2020	310771	370078	238764
2	DALYs (Disability-Adjusted Life Years)	132	Panama	1	Male	22	All ages	1048	COVID-19	1	Number	2020	73645	93483.8	55545
2	DALYs (Disability-Adjusted Life Years)	132	Panama	2	Female	22	All ages	1048	COVID-19	1	Number	2020	39146.4	48988.6	30060.7
2	DALYs (Disability-Adjusted Life Years)	132	Panama	3	Both	22	All ages	1048	COVID-19	1	Number	2020	112791	141751	85827.8
2	DALYs (Disability-Adjusted Life Years)	92	Spain	1	Male	22	All ages	1048	COVID-19	1	Number	2020	595162	626797	563844
2	DALYs (Disability-Adjusted Life Years)	92	Spain	2	Female	22	All ages	1048	COVID-19	1	Number	2020	421898	446980	397626
2	DALYs (Disability-Adjusted Life Years)	92	Spain	3	Both	22	All ages	1048	COVID-19	1	Number	2020	1.01706e+06	1.06543e+06	967451
2	DALYs (Disability-Adjusted Life Years)	49	North Macedonia	1	Male	22	All ages	1048	COVID-19	1	Number	2020	73213.3	93503.6	51886.7
2	DALYs (Disability-Adjusted Life Years)	49	North Macedonia	2	Female	22	All ages	1048	COVID-19	1	Number	2020	43488.3	55226.9	30771.1
2	DALYs (Disability-Adjusted Life Years)	49	North Macedonia	3	Both	22	All ages	1048	COVID-19	1	Number	2020	116702	147685	82700.6
2	DALYs (Disability-Adjusted Life Years)	109	Cuba	1	Male	22	All ages	1048	COVID-19	1	Number	2020	10089.9	44573.2	1274.77
2	DALYs (Disability-Adjusted Life Years)	109	Cuba	2	Female	22	All ages	1048	COVID-19	1	Number	2020	6267.62	28012.8	840.956
2	DALYs (Disability-Adjusted Life Years)	109	Cuba	3	Both	22	All ages	1048	COVID-19	1	Number	2020	16357.6	72028.9	2257.62
2	DALYs (Disability-Adjusted Life Years)	169	Central African Republic	1	Male	22	All ages	1048	COVID-19	1	Number	2020	150715	200461	102660
2	DALYs (Disability-Adjusted Life Years)	169	Central African Republic	2	Female	22	All ages	1048	COVID-19	1	Number	2020	85597.5	114267	60694.1
2	DALYs (Disability-Adjusted Life Years)	169	Central African Republic	3	Both	22	All ages	1048	COVID-19	1	Number	2020	236313	313749	163909
2	DALYs (Disability-Adjusted Life Years)	180	Kenya	1	Male	22	All ages	1048	COVID-19	1	Number	2020	936150	1.02649e+06	859073
2	DALYs (Disability-Adjusted Life Years)	180	Kenya	2	Female	22	All ages	1048	COVID-19	1	Number	2020	516637	574812	463757
2	DALYs (Disability-Adjusted Life Years)	180	Kenya	3	Both	22	All ages	1048	COVID-19	1	Number	2020	1.45279e+06	1.59699e+06	1.32585e+06
2	DALYs (Disability-Adjusted Life Years)	380	Palau	1	Male	22	All ages	1048	COVID-19	1	Number	2020	1.29871e-07	1.29871e-07	1.29871e-07
2	DALYs (Disability-Adjusted Life Years)	380	Palau	2	Female	22	All ages	1048	COVID-19	1	Number	2020	1.29925e-07	1.29925e-07	1.29925e-07
2	DALYs (Disability-Adjusted Life Years)	380	Palau	3	Both	22	All ages	1048	COVID-19	1	Number	2020	2.59796e-07	2.59796e-07	2.59796e-07
2	DALYs (Disability-Adjusted Life Years)	193	Botswana	1	Male	22	All ages	1048	COVID-19	1	Number	2020	16186.4	18436.4	14286.7
2	DALYs (Disability-Adjusted Life Years)	193	Botswana	2	Female	22	All ages	1048	COVID-19	1	Number	2020	9638.49	10999.4	8477.63
2	DALYs (Disability-Adjusted Life Years)	193	Botswana	3	Both	22	All ages	1048	COVID-19	1	Number	2020	25824.9	29380.2	22762.9
2	DALYs (Disability-Adjusted Life Years)	205	C么te d'Ivoire	1	Male	22	All ages	1048	COVID-19	1	Number	2020	337540	370814	303460
2	DALYs (Disability-Adjusted Life Years)	205	C么te d'Ivoire	2	Female	22	All ages	1048	COVID-19	1	Number	2020	162623	191808	141441
2	DALYs (Disability-Adjusted Life Years)	205	C么te d'Ivoire	3	Both	22	All ages	1048	COVID-19	1	Number	2020	500163	559930	447085
2	DALYs (Disability-Adjusted Life Years)	156	United Arab Emirates	1	Male	22	All ages	1048	COVID-19	1	Number	2020	24307.6	59818.2	7549.26
2	DALYs (Disability-Adjusted Life Years)	156	United Arab Emirates	2	Female	22	All ages	1048	COVID-19	1	Number	2020	5837.77	10691.9	2632.43
2	DALYs (Disability-Adjusted Life Years)	156	United Arab Emirates	3	Both	22	All ages	1048	COVID-19	1	Number	2020	30145.4	68550.2	10312.8
2	DALYs (Disability-Adjusted Life Years)	79	Finland	1	Male	22	All ages	1048	COVID-19	1	Number	2020	8543.6	13725	5959.38
2	DALYs (Disability-Adjusted Life Years)	79	Finland	2	Female	22	All ages	1048	COVID-19	1	Number	2020	5863.85	9306.38	4071.75
2	DALYs (Disability-Adjusted Life Years)	79	Finland	3	Both	22	All ages	1048	COVID-19	1	Number	2020	14407.4	23052.5	10076.3
2	DALYs (Disability-Adjusted Life Years)	216	Senegal	1	Male	22	All ages	1048	COVID-19	1	Number	2020	185965	202226	155764
2	DALYs (Disability-Adjusted Life Years)	216	Senegal	2	Female	22	All ages	1048	COVID-19	1	Number	2020	104046	117905	87859.8
2	DALYs (Disability-Adjusted Life Years)	216	Senegal	3	Both	22	All ages	1048	COVID-19	1	Number	2020	290011	317109	244166
2	DALYs (Disability-Adjusted Life Years)	27	Samoa	1	Male	22	All ages	1048	COVID-19	1	Number	2020	0.15845	0.467999	0.0198367
2	DALYs (Disability-Adjusted Life Years)	27	Samoa	2	Female	22	All ages	1048	COVID-19	1	Number	2020	0.205496	0.647262	0.0242819
2	DALYs (Disability-Adjusted Life Years)	27	Samoa	3	Both	22	All ages	1048	COVID-19	1	Number	2020	0.363946	1.1196	0.0442474
2	DALYs (Disability-Adjusted Life Years)	86	Italy	1	Male	22	All ages	1048	COVID-19	1	Number	2020	812073	848604	774668
2	DALYs (Disability-Adjusted Life Years)	86	Italy	2	Female	22	All ages	1048	COVID-19	1	Number	2020	549617	576379	524245
2	DALYs (Disability-Adjusted Life Years)	86	Italy	3	Both	22	All ages	1048	COVID-19	1	Number	2020	1.36169e+06	1.41548e+06	1.30668e+06
2	DALYs (Disability-Adjusted Life Years)	115	Jamaica	1	Male	22	All ages	1048	COVID-19	1	Number	2020	4728.28	4942.24	4631.31
2	DALYs (Disability-Adjusted Life Years)	115	Jamaica	2	Female	22	All ages	1048	COVID-19	1	Number	2020	3071.65	3412.04	2911.37
2	DALYs (Disability-Adjusted Life Years)	115	Jamaica	3	Both	22	All ages	1048	COVID-19	1	Number	2020	7799.93	8344.37	7543.09
2	DALYs (Disability-Adjusted Life Years)	217	Sierra Leone	1	Male	22	All ages	1048	COVID-19	1	Number	2020	99193.7	115516	85925
2	DALYs (Disability-Adjusted Life Years)	217	Sierra Leone	2	Female	22	All ages	1048	COVID-19	1	Number	2020	53602.9	64590.6	45607.9
2	DALYs (Disability-Adjusted Life Years)	217	Sierra Leone	3	Both	22	All ages	1048	COVID-19	1	Number	2020	152797	179289	131044
2	DALYs (Disability-Adjusted Life Years)	351	Guam	1	Male	22	All ages	1048	COVID-19	1	Number	2020	2125.38	2450.39	1841.16
2	DALYs (Disability-Adjusted Life Years)	351	Guam	2	Female	22	All ages	1048	COVID-19	1	Number	2020	1071.68	1327.33	858.048
2	DALYs (Disability-Adjusted Life Years)	351	Guam	3	Both	22	All ages	1048	COVID-19	1	Number	2020	3197.05	3685.99	2808.7
2	DALYs (Disability-Adjusted Life Years)	181	Madagascar	1	Male	22	All ages	1048	COVID-19	1	Number	2020	418983	455025	383402
2	DALYs (Disability-Adjusted Life Years)	181	Madagascar	2	Female	22	All ages	1048	COVID-19	1	Number	2020	236773	270662	211438
2	DALYs (Disability-Adjusted Life Years)	181	Madagascar	3	Both	22	All ages	1048	COVID-19	1	Number	2020	655756	719525	595256
2	DALYs (Disability-Adjusted Life Years)	206	Gambia	1	Male	22	All ages	1048	COVID-19	1	Number	2020	38308.3	44475.4	34383.4
2	DALYs (Disability-Adjusted Life Years)	206	Gambia	2	Female	22	All ages	1048	COVID-19	1	Number	2020	21370.3	25147.9	18546.6
2	DALYs (Disability-Adjusted Life Years)	206	Gambia	3	Both	22	All ages	1048	COVID-19	1	Number	2020	59678.6	68950.6	52974.8
2	DALYs (Disability-Adjusted Life Years)	25	Micronesia (Federated States of)	1	Male	22	All ages	1048	COVID-19	1	Number	2020	1.29881e-07	1.29881e-07	1.29881e-07
2	DALYs (Disability-Adjusted Life Years)	25	Micronesia (Federated States of)	2	Female	22	All ages	1048	COVID-19	1	Number	2020	1.29855e-07	1.29855e-07	1.29855e-07
2	DALYs (Disability-Adjusted Life Years)	25	Micronesia (Federated States of)	3	Both	22	All ages	1048	COVID-19	1	Number	2020	2.59736e-07	2.59736e-07	2.59736e-07
2	DALYs (Disability-Adjusted Life Years)	37	Kyrgyzstan	1	Male	22	All ages	1048	COVID-19	1	Number	2020	100735	123611	73716.1
2	DALYs (Disability-Adjusted Life Years)	37	Kyrgyzstan	2	Female	22	All ages	1048	COVID-19	1	Number	2020	65346	81233.4	49447.3
2	DALYs (Disability-Adjusted Life Years)	37	Kyrgyzstan	3	Both	22	All ages	1048	COVID-19	1	Number	2020	166081	203221	124193
2	DALYs (Disability-Adjusted Life Years)	85	Israel	1	Male	22	All ages	1048	COVID-19	1	Number	2020	42098	45451.5	39038.1
2	DALYs (Disability-Adjusted Life Years)	85	Israel	2	Female	22	All ages	1048	COVID-19	1	Number	2020	23882.5	26518.1	21891.6
2	DALYs (Disability-Adjusted Life Years)	85	Israel	3	Both	22	All ages	1048	COVID-19	1	Number	2020	65980.5	70967.6	61896.8
2	DALYs (Disability-Adjusted Life Years)	105	Antigua and Barbuda	1	Male	22	All ages	1048	COVID-19	1	Number	2020	93.9021	112.048	79.2637
2	DALYs (Disability-Adjusted Life Years)	105	Antigua and Barbuda	2	Female	22	All ages	1048	COVID-19	1	Number	2020	57.4692	71.0029	46.7738
2	DALYs (Disability-Adjusted Life Years)	105	Antigua and Barbuda	3	Both	22	All ages	1048	COVID-19	1	Number	2020	151.371	180.273	128.461
2	DALYs (Disability-Adjusted Life Years)	97	Argentina	1	Male	22	All ages	1048	COVID-19	1	Number	2020	550544	573389	529902
2	DALYs (Disability-Adjusted Life Years)	97	Argentina	2	Female	22	All ages	1048	COVID-19	1	Number	2020	355255	375211	339782
2	DALYs (Disability-Adjusted Life Years)	97	Argentina	3	Both	22	All ages	1048	COVID-19	1	Number	2020	905799	946374	871603
2	DALYs (Disability-Adjusted Life Years)	393	Saint Kitts and Nevis	1	Male	22	All ages	1048	COVID-19	1	Number	2020	0.747364	2.93761	0.136092
2	DALYs (Disability-Adjusted Life Years)	393	Saint Kitts and Nevis	2	Female	22	All ages	1048	COVID-19	1	Number	2020	1.23328	4.59955	0.189
2	DALYs (Disability-Adjusted Life Years)	393	Saint Kitts and Nevis	3	Both	22	All ages	1048	COVID-19	1	Number	2020	1.98065	7.48424	0.339927
2	DALYs (Disability-Adjusted Life Years)	218	Togo	1	Male	22	All ages	1048	COVID-19	1	Number	2020	54185.6	62518.1	46419.6
2	DALYs (Disability-Adjusted Life Years)	218	Togo	2	Female	22	All ages	1048	COVID-19	1	Number	2020	34155.9	40036.8	28715.4
2	DALYs (Disability-Adjusted Life Years)	218	Togo	3	Both	22	All ages	1048	COVID-19	1	Number	2020	88341.5	102601	75042
2	DALYs (Disability-Adjusted Life Years)	91	Portugal	1	Male	22	All ages	1048	COVID-19	1	Number	2020	92833.3	102674	82236.7
2	DALYs (Disability-Adjusted Life Years)	91	Portugal	2	Female	22	All ages	1048	COVID-19	1	Number	2020	65825.1	72633.3	58769.8
2	DALYs (Disability-Adjusted Life Years)	91	Portugal	3	Both	22	All ages	1048	COVID-19	1	Number	2020	158658	174755	141814
2	DALYs (Disability-Adjusted Life Years)	12	Lao People's Democratic Republic	1	Male	22	All ages	1048	COVID-19	1	Number	2021	62008.5	122506	24639.8
2	DALYs (Disability-Adjusted Life Years)	12	Lao People's Democratic Republic	2	Female	22	All ages	1048	COVID-19	1	Number	2021	34586.3	67565.9	14033.6
2	DALYs (Disability-Adjusted Life Years)	12	Lao People's Democratic Republic	3	Both	22	All ages	1048	COVID-19	1	Number	2021	96594.7	189267	38854.1
2	DALYs (Disability-Adjusted Life Years)	72	New Zealand	1	Male	22	All ages	1048	COVID-19	1	Number	2021	331.713	375.802	293.357
2	DALYs (Disability-Adjusted Life Years)	72	New Zealand	2	Female	22	All ages	1048	COVID-19	1	Number	2021	245.491	285.448	214.934
2	DALYs (Disability-Adjusted Life Years)	72	New Zealand	3	Both	22	All ages	1048	COVID-19	1	Number	2021	577.205	647.34	521.763
2	DALYs (Disability-Adjusted Life Years)	6	China	1	Male	22	All ages	1048	COVID-19	1	Number	2021	12013.9	41717.6	1675.02
2	DALYs (Disability-Adjusted Life Years)	6	China	2	Female	22	All ages	1048	COVID-19	1	Number	2021	7792.83	24491.7	1528.33
2	DALYs (Disability-Adjusted Life Years)	6	China	3	Both	22	All ages	1048	COVID-19	1	Number	2021	19806.7	66092.2	3283.42
2	DALYs (Disability-Adjusted Life Years)	84	Ireland	1	Male	22	All ages	1048	COVID-19	1	Number	2021	42313.3	45654.3	39267.1
2	DALYs (Disability-Adjusted Life Years)	84	Ireland	2	Female	22	All ages	1048	COVID-19	1	Number	2021	28623.4	32560.6	26121
2	DALYs (Disability-Adjusted Life Years)	84	Ireland	3	Both	22	All ages	1048	COVID-19	1	Number	2021	70936.8	77577.6	65539.4
2	DALYs (Disability-Adjusted Life Years)	74	Andorra	1	Male	22	All ages	1048	COVID-19	1	Number	2021	974.425	1384.22	776.845
2	DALYs (Disability-Adjusted Life Years)	74	Andorra	2	Female	22	All ages	1048	COVID-19	1	Number	2021	557.239	793.354	414.31
2	DALYs (Disability-Adjusted Life Years)	74	Andorra	3	Both	22	All ages	1048	COVID-19	1	Number	2021	1531.66	2169.67	1188.63
2	DALYs (Disability-Adjusted Life Years)	8	Taiwan (Province of China)	1	Male	22	All ages	1048	COVID-19	1	Number	2021	19158.2	80331.5	4532.45
2	DALYs (Disability-Adjusted Life Years)	8	Taiwan (Province of China)	2	Female	22	All ages	1048	COVID-19	1	Number	2021	10313.9	43450.2	2640.2
2	DALYs (Disability-Adjusted Life Years)	8	Taiwan (Province of China)	3	Both	22	All ages	1048	COVID-19	1	Number	2021	29472.1	122724	7207.84
2	DALYs (Disability-Adjusted Life Years)	20	Viet Nam	1	Male	22	All ages	1048	COVID-19	1	Number	2021	594367	951967	518697
2	DALYs (Disability-Adjusted Life Years)	20	Viet Nam	2	Female	22	All ages	1048	COVID-19	1	Number	2021	369348	598696	315998
2	DALYs (Disability-Adjusted Life Years)	20	Viet Nam	3	Both	22	All ages	1048	COVID-19	1	Number	2021	963715	1.55066e+06	834750
2	DALYs (Disability-Adjusted Life Years)	7	Democratic People's Republic of Korea	1	Male	22	All ages	1048	COVID-19	1	Number	2021	163.01	416.203	54.4875
2	DALYs (Disability-Adjusted Life Years)	7	Democratic People's Republic of Korea	2	Female	22	All ages	1048	COVID-19	1	Number	2021	231.783	570.696	79.3856
2	DALYs (Disability-Adjusted Life Years)	7	Democratic People's Republic of Korea	3	Both	22	All ages	1048	COVID-19	1	Number	2021	394.793	992.508	133.339
2	DALYs (Disability-Adjusted Life Years)	86	Italy	1	Male	22	All ages	1048	COVID-19	1	Number	2021	673303	714875	632300
2	DALYs (Disability-Adjusted Life Years)	86	Italy	2	Female	22	All ages	1048	COVID-19	1	Number	2021	462527	512807	424815
2	DALYs (Disability-Adjusted Life Years)	86	Italy	3	Both	22	All ages	1048	COVID-19	1	Number	2021	1.13583e+06	1.22386e+06	1.06338e+06
2	DALYs (Disability-Adjusted Life Years)	110	Dominica	1	Male	22	All ages	1048	COVID-19	1	Number	2021	1736.65	3094.65	747.065
2	DALYs (Disability-Adjusted Life Years)	110	Dominica	2	Female	22	All ages	1048	COVID-19	1	Number	2021	950.114	1679.36	413.262
2	DALYs (Disability-Adjusted Life Years)	110	Dominica	3	Both	22	All ages	1048	COVID-19	1	Number	2021	2686.77	4774	1161.87
2	DALYs (Disability-Adjusted Life Years)	17	Sri Lanka	1	Male	22	All ages	1048	COVID-19	1	Number	2021	256197	462577	221536
2	DALYs (Disability-Adjusted Life Years)	17	Sri Lanka	2	Female	22	All ages	1048	COVID-19	1	Number	2021	158443	280230	134098
2	DALYs (Disability-Adjusted Life Years)	17	Sri Lanka	3	Both	22	All ages	1048	COVID-19	1	Number	2021	414640	744094	355735
2	DALYs (Disability-Adjusted Life Years)	10	Cambodia	1	Male	22	All ages	1048	COVID-19	1	Number	2021	157673	302869	57168.9
2	DALYs (Disability-Adjusted Life Years)	10	Cambodia	2	Female	22	All ages	1048	COVID-19	1	Number	2021	106632	197762	40378
2	DALYs (Disability-Adjusted Life Years)	10	Cambodia	3	Both	22	All ages	1048	COVID-19	1	Number	2021	264306	500631	98234.5
2	DALYs (Disability-Adjusted Life Years)	22	Fiji	1	Male	22	All ages	1048	COVID-19	1	Number	2021	21769.2	42709.3	13139.1
2	DALYs (Disability-Adjusted Life Years)	22	Fiji	2	Female	22	All ages	1048	COVID-19	1	Number	2021	11872.5	22775	7081.24
2	DALYs (Disability-Adjusted Life Years)	22	Fiji	3	Both	22	All ages	1048	COVID-19	1	Number	2021	33641.6	65439.1	20249.3
2	DALYs (Disability-Adjusted Life Years)	125	Colombia	1	Male	22	All ages	1048	COVID-19	1	Number	2021	1.22452e+06	1.35842e+06	1.18072e+06
2	DALYs (Disability-Adjusted Life Years)	125	Colombia	2	Female	22	All ages	1048	COVID-19	1	Number	2021	769393	878049	715279
2	DALYs (Disability-Adjusted Life Years)	125	Colombia	3	Both	22	All ages	1048	COVID-19	1	Number	2021	1.99391e+06	2.23561e+06	1.89669e+06
2	DALYs (Disability-Adjusted Life Years)	19	Timor-Leste	1	Male	22	All ages	1048	COVID-19	1	Number	2021	14035.4	26788.2	5162.71
2	DALYs (Disability-Adjusted Life Years)	19	Timor-Leste	2	Female	22	All ages	1048	COVID-19	1	Number	2021	7878.36	14667.3	3184.75
2	DALYs (Disability-Adjusted Life Years)	19	Timor-Leste	3	Both	22	All ages	1048	COVID-19	1	Number	2021	21913.7	41209.3	8470.78
2	DALYs (Disability-Adjusted Life Years)	54	Slovakia	1	Male	22	All ages	1048	COVID-19	1	Number	2021	204400	271294	139325
2	DALYs (Disability-Adjusted Life Years)	54	Slovakia	2	Female	22	All ages	1048	COVID-19	1	Number	2021	142603	184606	101337
2	DALYs (Disability-Adjusted Life Years)	54	Slovakia	3	Both	22	All ages	1048	COVID-19	1	Number	2021	347004	454216	244224
2	DALYs (Disability-Adjusted Life Years)	149	Palestine	1	Male	22	All ages	1048	COVID-19	1	Number	2021	70272.3	81052.1	65130.6
2	DALYs (Disability-Adjusted Life Years)	149	Palestine	2	Female	22	All ages	1048	COVID-19	1	Number	2021	42448.3	57905.6	34614
2	DALYs (Disability-Adjusted Life Years)	149	Palestine	3	Both	22	All ages	1048	COVID-19	1	Number	2021	112721	138528	99724
2	DALYs (Disability-Adjusted Life Years)	161	Bangladesh	1	Male	22	All ages	1048	COVID-19	1	Number	2021	2.39566e+06	2.89397e+06	2.0161e+06
2	DALYs (Disability-Adjusted Life Years)	161	Bangladesh	2	Female	22	All ages	1048	COVID-19	1	Number	2021	1.35117e+06	1.86381e+06	1.0636e+06
2	DALYs (Disability-Adjusted Life Years)	161	Bangladesh	3	Both	22	All ages	1048	COVID-19	1	Number	2021	3.74683e+06	4.70177e+06	3.09961e+06
2	DALYs (Disability-Adjusted Life Years)	173	Gabon	1	Male	22	All ages	1048	COVID-19	1	Number	2021	41866.4	49025.4	31190.3
2	DALYs (Disability-Adjusted Life Years)	173	Gabon	2	Female	22	All ages	1048	COVID-19	1	Number	2021	23976.9	29414.6	17669.1
2	DALYs (Disability-Adjusted Life Years)	173	Gabon	3	Both	22	All ages	1048	COVID-19	1	Number	2021	65843.3	77703.4	48929.5
2	DALYs (Disability-Adjusted Life Years)	79	Finland	1	Male	22	All ages	1048	COVID-19	1	Number	2021	19737.1	25352	13917.5
2	DALYs (Disability-Adjusted Life Years)	79	Finland	2	Female	22	All ages	1048	COVID-19	1	Number	2021	12979.7	16657.2	9304.88
2	DALYs (Disability-Adjusted Life Years)	79	Finland	3	Both	22	All ages	1048	COVID-19	1	Number	2021	32716.8	41853.3	23236.5
2	DALYs (Disability-Adjusted Life Years)	185	Rwanda	1	Male	22	All ages	1048	COVID-19	1	Number	2021	268736	298537	222198
2	DALYs (Disability-Adjusted Life Years)	185	Rwanda	2	Female	22	All ages	1048	COVID-19	1	Number	2021	175306	203907	146347
2	DALYs (Disability-Adjusted Life Years)	185	Rwanda	3	Both	22	All ages	1048	COVID-19	1	Number	2021	444042	495814	368549
2	DALYs (Disability-Adjusted Life Years)	78	Denmark	1	Male	22	All ages	1048	COVID-19	1	Number	2021	21267.6	25880.2	18590.5
2	DALYs (Disability-Adjusted Life Years)	78	Denmark	2	Female	22	All ages	1048	COVID-19	1	Number	2021	15370.6	19023.6	13066.6
2	DALYs (Disability-Adjusted Life Years)	78	Denmark	3	Both	22	All ages	1048	COVID-19	1	Number	2021	36638.2	44813.7	31810.6
2	DALYs (Disability-Adjusted Life Years)	66	Brunei Darussalam	1	Male	22	All ages	1048	COVID-19	1	Number	2021	1917.94	2497.3	1816.5
2	DALYs (Disability-Adjusted Life Years)	66	Brunei Darussalam	2	Female	22	All ages	1048	COVID-19	1	Number	2021	964.097	1254.26	885.339
2	DALYs (Disability-Adjusted Life Years)	66	Brunei Darussalam	3	Both	22	All ages	1048	COVID-19	1	Number	2021	2882.04	3733.7	2702.4
2	DALYs (Disability-Adjusted Life Years)	102	United States of America	1	Male	22	All ages	1048	COVID-19	1	Number	2021	6.88212e+06	7.13098e+06	6.69864e+06
2	DALYs (Disability-Adjusted Life Years)	102	United States of America	2	Female	22	All ages	1048	COVID-19	1	Number	2021	4.33184e+06	4.73749e+06	4.12522e+06
2	DALYs (Disability-Adjusted Life Years)	102	United States of America	3	Both	22	All ages	1048	COVID-19	1	Number	2021	1.1214e+07	1.18405e+07	1.0837e+07
2	DALYs (Disability-Adjusted Life Years)	198	Zimbabwe	1	Male	22	All ages	1048	COVID-19	1	Number	2021	807623	948236	628573
2	DALYs (Disability-Adjusted Life Years)	198	Zimbabwe	2	Female	22	All ages	1048	COVID-19	1	Number	2021	522579	628991	408567
2	DALYs (Disability-Adjusted Life Years)	198	Zimbabwe	3	Both	22	All ages	1048	COVID-19	1	Number	2021	1.3302e+06	1.57523e+06	1.03821e+06
2	DALYs (Disability-Adjusted Life Years)	11	Indonesia	1	Male	22	All ages	1048	COVID-19	1	Number	2021	4.79593e+06	8.87986e+06	2.62031e+06
2	DALYs (Disability-Adjusted Life Years)	11	Indonesia	2	Female	22	All ages	1048	COVID-19	1	Number	2021	2.66848e+06	4.69646e+06	1.4712e+06
2	DALYs (Disability-Adjusted Life Years)	11	Indonesia	3	Both	22	All ages	1048	COVID-19	1	Number	2021	7.46441e+06	1.36085e+07	4.07795e+06
2	DALYs (Disability-Adjusted Life Years)	139	Algeria	1	Male	22	All ages	1048	COVID-19	1	Number	2021	1.02187e+06	1.22387e+06	801103
2	DALYs (Disability-Adjusted Life Years)	139	Algeria	2	Female	22	All ages	1048	COVID-19	1	Number	2021	484400	582279	384090
2	DALYs (Disability-Adjusted Life Years)	139	Algeria	3	Both	22	All ages	1048	COVID-19	1	Number	2021	1.50627e+06	1.80291e+06	1.19014e+06
2	DALYs (Disability-Adjusted Life Years)	91	Portugal	1	Male	22	All ages	1048	COVID-19	1	Number	2021	130066	138379	123093
2	DALYs (Disability-Adjusted Life Years)	91	Portugal	2	Female	22	All ages	1048	COVID-19	1	Number	2021	87604	98144	80583.1
2	DALYs (Disability-Adjusted Life Years)	91	Portugal	3	Both	22	All ages	1048	COVID-19	1	Number	2021	217670	235492	204816
2	DALYs (Disability-Adjusted Life Years)	115	Jamaica	1	Male	22	All ages	1048	COVID-19	1	Number	2021	48920.5	69352.2	30188.5
2	DALYs (Disability-Adjusted Life Years)	115	Jamaica	2	Female	22	All ages	1048	COVID-19	1	Number	2021	28512.5	40650	18020.1
2	DALYs (Disability-Adjusted Life Years)	115	Jamaica	3	Both	22	All ages	1048	COVID-19	1	Number	2021	77433	109808	48263.5
2	DALYs (Disability-Adjusted Life Years)	90	Norway	1	Male	22	All ages	1048	COVID-19	1	Number	2021	9347.78	11334.6	7852.74
2	DALYs (Disability-Adjusted Life Years)	90	Norway	2	Female	22	All ages	1048	COVID-19	1	Number	2021	7401.1	9359.34	6056.58
2	DALYs (Disability-Adjusted Life Years)	90	Norway	3	Both	22	All ages	1048	COVID-19	1	Number	2021	16748.9	20675.5	14189
2	DALYs (Disability-Adjusted Life Years)	210	Liberia	1	Male	22	All ages	1048	COVID-19	1	Number	2021	71009.4	84232	59314.7
2	DALYs (Disability-Adjusted Life Years)	210	Liberia	2	Female	22	All ages	1048	COVID-19	1	Number	2021	37313.1	49758.8	29942.8
2	DALYs (Disability-Adjusted Life Years)	210	Liberia	3	Both	22	All ages	1048	COVID-19	1	Number	2021	108323	132681	89727.8
2	DALYs (Disability-Adjusted Life Years)	117	Saint Vincent and the Grenadines	1	Male	22	All ages	1048	COVID-19	1	Number	2021	1654.89	2195.15	1257.43
2	DALYs (Disability-Adjusted Life Years)	117	Saint Vincent and the Grenadines	2	Female	22	All ages	1048	COVID-19	1	Number	2021	825.012	1095.7	616.508
2	DALYs (Disability-Adjusted Life Years)	117	Saint Vincent and the Grenadines	3	Both	22	All ages	1048	COVID-19	1	Number	2021	2479.9	3281.17	1875.43
2	DALYs (Disability-Adjusted Life Years)	150	Oman	1	Male	22	All ages	1048	COVID-19	1	Number	2021	117332	125163	109911
2	DALYs (Disability-Adjusted Life Years)	150	Oman	2	Female	22	All ages	1048	COVID-19	1	Number	2021	36152.6	41701.6	32630.2
2	DALYs (Disability-Adjusted Life Years)	150	Oman	3	Both	22	All ages	1048	COVID-19	1	Number	2021	153484	167296	142780
2	DALYs (Disability-Adjusted Life Years)	186	Seychelles	1	Male	22	All ages	1048	COVID-19	1	Number	2021	2139.18	2420.31	1914.17
2	DALYs (Disability-Adjusted Life Years)	186	Seychelles	2	Female	22	All ages	1048	COVID-19	1	Number	2021	1446.79	1838.56	1087.56
2	DALYs (Disability-Adjusted Life Years)	186	Seychelles	3	Both	22	All ages	1048	COVID-19	1	Number	2021	3585.98	4075.74	3179.29
2	DALYs (Disability-Adjusted Life Years)	211	Mali	1	Male	22	All ages	1048	COVID-19	1	Number	2021	538943	594679	490623
2	DALYs (Disability-Adjusted Life Years)	211	Mali	2	Female	22	All ages	1048	COVID-19	1	Number	2021	284428	338971	248965
2	DALYs (Disability-Adjusted Life Years)	211	Mali	3	Both	22	All ages	1048	COVID-19	1	Number	2021	823370	928159	743002
2	DALYs (Disability-Adjusted Life Years)	141	Egypt	1	Male	22	All ages	1048	COVID-19	1	Number	2021	2.33885e+06	3.01384e+06	1.61052e+06
2	DALYs (Disability-Adjusted Life Years)	141	Egypt	2	Female	22	All ages	1048	COVID-19	1	Number	2021	1.07255e+06	1.38175e+06	728063
2	DALYs (Disability-Adjusted Life Years)	141	Egypt	3	Both	22	All ages	1048	COVID-19	1	Number	2021	3.4114e+06	4.37581e+06	2.37098e+06
2	DALYs (Disability-Adjusted Life Years)	80	France	1	Male	22	All ages	1048	COVID-19	1	Number	2021	689885	728966	654972
2	DALYs (Disability-Adjusted Life Years)	80	France	2	Female	22	All ages	1048	COVID-19	1	Number	2021	477933	532879	443155
2	DALYs (Disability-Adjusted Life Years)	80	France	3	Both	22	All ages	1048	COVID-19	1	Number	2021	1.16782e+06	1.25459e+06	1.10342e+06
2	DALYs (Disability-Adjusted Life Years)	175	Burundi	1	Male	22	All ages	1048	COVID-19	1	Number	2021	167112	182348	150728
2	DALYs (Disability-Adjusted Life Years)	175	Burundi	2	Female	22	All ages	1048	COVID-19	1	Number	2021	80053.9	90315.6	71413
2	DALYs (Disability-Adjusted Life Years)	175	Burundi	3	Both	22	All ages	1048	COVID-19	1	Number	2021	247166	270031	222178
2	DALYs (Disability-Adjusted Life Years)	33	Armenia	1	Male	22	All ages	1048	COVID-19	1	Number	2021	71625.5	77332.8	68932.9
2	DALYs (Disability-Adjusted Life Years)	33	Armenia	2	Female	22	All ages	1048	COVID-19	1	Number	2021	51077	61079.2	45985.2
2	DALYs (Disability-Adjusted Life Years)	33	Armenia	3	Both	22	All ages	1048	COVID-19	1	Number	2021	122703	139137	114889
2	DALYs (Disability-Adjusted Life Years)	68	Republic of Korea	1	Male	22	All ages	1048	COVID-19	1	Number	2021	129010	142924	118664
2	DALYs (Disability-Adjusted Life Years)	68	Republic of Korea	2	Female	22	All ages	1048	COVID-19	1	Number	2021	76749.7	84573.7	70110.5
2	DALYs (Disability-Adjusted Life Years)	68	Republic of Korea	3	Both	22	All ages	1048	COVID-19	1	Number	2021	205759	227523	188663
2	DALYs (Disability-Adjusted Life Years)	162	Bhutan	1	Male	22	All ages	1048	COVID-19	1	Number	2021	1780.63	2173.71	1440.19
2	DALYs (Disability-Adjusted Life Years)	162	Bhutan	2	Female	22	All ages	1048	COVID-19	1	Number	2021	885.436	1074.58	707.902
2	DALYs (Disability-Adjusted Life Years)	162	Bhutan	3	Both	22	All ages	1048	COVID-19	1	Number	2021	2666.07	3241.4	2148.9
2	DALYs (Disability-Adjusted Life Years)	13	Malaysia	1	Male	22	All ages	1048	COVID-19	1	Number	2021	568503	693476	535791
2	DALYs (Disability-Adjusted Life Years)	13	Malaysia	2	Female	22	All ages	1048	COVID-19	1	Number	2021	289907	351015	264220
2	DALYs (Disability-Adjusted Life Years)	13	Malaysia	3	Both	22	All ages	1048	COVID-19	1	Number	2021	858410	1.03938e+06	800704
2	DALYs (Disability-Adjusted Life Years)	187	Somalia	1	Male	22	All ages	1048	COVID-19	1	Number	2021	656718	881172	474863
2	DALYs (Disability-Adjusted Life Years)	187	Somalia	2	Female	22	All ages	1048	COVID-19	1	Number	2021	396734	524767	283264
2	DALYs (Disability-Adjusted Life Years)	187	Somalia	3	Both	22	All ages	1048	COVID-19	1	Number	2021	1.05345e+06	1.40133e+06	757609
2	DALYs (Disability-Adjusted Life Years)	200	Benin	1	Male	22	All ages	1048	COVID-19	1	Number	2021	177860	198080	158945
2	DALYs (Disability-Adjusted Life Years)	200	Benin	2	Female	22	All ages	1048	COVID-19	1	Number	2021	105158	121449	90993.2
2	DALYs (Disability-Adjusted Life Years)	200	Benin	3	Both	22	All ages	1048	COVID-19	1	Number	2021	283018	315877	250223
2	DALYs (Disability-Adjusted Life Years)	92	Spain	1	Male	22	All ages	1048	COVID-19	1	Number	2021	444030	475210	420444
2	DALYs (Disability-Adjusted Life Years)	92	Spain	2	Female	22	All ages	1048	COVID-19	1	Number	2021	300139	341362	276973
2	DALYs (Disability-Adjusted Life Years)	92	Spain	3	Both	22	All ages	1048	COVID-19	1	Number	2021	744169	813956	700175
2	DALYs (Disability-Adjusted Life Years)	128	Guatemala	1	Male	22	All ages	1048	COVID-19	1	Number	2021	392628	455761	327606
2	DALYs (Disability-Adjusted Life Years)	128	Guatemala	2	Female	22	All ages	1048	COVID-19	1	Number	2021	239638	292210	195962
2	DALYs (Disability-Adjusted Life Years)	128	Guatemala	3	Both	22	All ages	1048	COVID-19	1	Number	2021	632266	743526	525303
2	DALYs (Disability-Adjusted Life Years)	116	Saint Lucia	1	Male	22	All ages	1048	COVID-19	1	Number	2021	4980.98	7859.49	4227.06
2	DALYs (Disability-Adjusted Life Years)	116	Saint Lucia	2	Female	22	All ages	1048	COVID-19	1	Number	2021	2782.99	4309.32	2317.07
2	DALYs (Disability-Adjusted Life Years)	116	Saint Lucia	3	Both	22	All ages	1048	COVID-19	1	Number	2021	7763.96	12167	6549.41
2	DALYs (Disability-Adjusted Life Years)	18	Thailand	1	Male	22	All ages	1048	COVID-19	1	Number	2021	567593	1.1067e+06	296621
2	DALYs (Disability-Adjusted Life Years)	18	Thailand	2	Female	22	All ages	1048	COVID-19	1	Number	2021	345246	660929	179929
2	DALYs (Disability-Adjusted Life Years)	18	Thailand	3	Both	22	All ages	1048	COVID-19	1	Number	2021	912839	1.76763e+06	476452
2	DALYs (Disability-Adjusted Life Years)	46	Croatia	1	Male	22	All ages	1048	COVID-19	1	Number	2021	101223	140626	64233.8
2	DALYs (Disability-Adjusted Life Years)	46	Croatia	2	Female	22	All ages	1048	COVID-19	1	Number	2021	73785.9	99546.4	50857.3
2	DALYs (Disability-Adjusted Life Years)	46	Croatia	3	Both	22	All ages	1048	COVID-19	1	Number	2021	175009	240804	114928
2	DALYs (Disability-Adjusted Life Years)	212	Mauritania	1	Male	22	All ages	1048	COVID-19	1	Number	2021	44651.4	56292.7	31004
2	DALYs (Disability-Adjusted Life Years)	212	Mauritania	2	Female	22	All ages	1048	COVID-19	1	Number	2021	27186.5	38345.6	18471.9
2	DALYs (Disability-Adjusted Life Years)	212	Mauritania	3	Both	22	All ages	1048	COVID-19	1	Number	2021	71837.9	92757.3	49026.3
2	DALYs (Disability-Adjusted Life Years)	15	Myanmar	1	Male	22	All ages	1048	COVID-19	1	Number	2021	723222	1.42704e+06	292210
2	DALYs (Disability-Adjusted Life Years)	15	Myanmar	2	Female	22	All ages	1048	COVID-19	1	Number	2021	473816	904605	198507
2	DALYs (Disability-Adjusted Life Years)	15	Myanmar	3	Both	22	All ages	1048	COVID-19	1	Number	2021	1.19704e+06	2.33315e+06	493042
2	DALYs (Disability-Adjusted Life Years)	130	Mexico	1	Male	22	All ages	1048	COVID-19	1	Number	2021	4.69901e+06	6.25654e+06	3.15932e+06
2	DALYs (Disability-Adjusted Life Years)	130	Mexico	2	Female	22	All ages	1048	COVID-19	1	Number	2021	2.98527e+06	4.03019e+06	2.02907e+06
2	DALYs (Disability-Adjusted Life Years)	130	Mexico	3	Both	22	All ages	1048	COVID-19	1	Number	2021	7.68428e+06	9.79247e+06	5.79664e+06
2	DALYs (Disability-Adjusted Life Years)	14	Maldives	1	Male	22	All ages	1048	COVID-19	1	Number	2021	5045	6526.71	4700.38
2	DALYs (Disability-Adjusted Life Years)	14	Maldives	2	Female	22	All ages	1048	COVID-19	1	Number	2021	1926.99	2507.94	1655.97
2	DALYs (Disability-Adjusted Life Years)	14	Maldives	3	Both	22	All ages	1048	COVID-19	1	Number	2021	6971.98	8825.56	6357.14
2	DALYs (Disability-Adjusted Life Years)	154	Tunisia	1	Male	22	All ages	1048	COVID-19	1	Number	2021	420984	507961	338637
2	DALYs (Disability-Adjusted Life Years)	154	Tunisia	2	Female	22	All ages	1048	COVID-19	1	Number	2021	239057	293175	187811
2	DALYs (Disability-Adjusted Life Years)	154	Tunisia	3	Both	22	All ages	1048	COVID-19	1	Number	2021	660042	791888	526381
2	DALYs (Disability-Adjusted Life Years)	27	Samoa	1	Male	22	All ages	1048	COVID-19	1	Number	2021	0.734926	2.23902	0.0930889
[truncated: 1,673 more rows]

## Sheet: The Age-standardized Rate
measure_id	measure_name	location_id	location_name	sex_id	sex_name	age_id	age_name	cause_id	cause_name	metric_id	metric_name	year	val	upper	lower
1	Deaths	192	Southern Sub-Saharan Africa	1	Male	27	Age-standardized	1048	COVID-19	3	Rate	2020	357.31	362.353	351.911
1	Deaths	192	Southern Sub-Saharan Africa	2	Female	27	Age-standardized	1048	COVID-19	3	Rate	2020	188.428	190.962	185.809
1	Deaths	192	Southern Sub-Saharan Africa	3	Both	27	Age-standardized	1048	COVID-19	3	Rate	2020	254.463	258.005	250.744
1	Deaths	159	South Asia	1	Male	27	Age-standardized	1048	COVID-19	3	Rate	2020	138.29	147.358	129.429
1	Deaths	159	South Asia	2	Female	27	Age-standardized	1048	COVID-19	3	Rate	2020	68.7962	73.2061	64.249
1	Deaths	159	South Asia	3	Both	27	Age-standardized	1048	COVID-19	3	Rate	2020	101.814	108.487	95.2279
1	Deaths	65	High-income Asia Pacific	1	Male	27	Age-standardized	1048	COVID-19	3	Rate	2020	1.26657	1.54823	1.04755
1	Deaths	65	High-income Asia Pacific	2	Female	27	Age-standardized	1048	COVID-19	3	Rate	2020	0.613394	0.75927	0.510711
1	Deaths	65	High-income Asia Pacific	3	Both	27	Age-standardized	1048	COVID-19	3	Rate	2020	0.883835	1.08048	0.747013
1	Deaths	21	Oceania	1	Male	27	Age-standardized	1048	COVID-19	3	Rate	2020	23.9808	48.8689	7.49707
1	Deaths	21	Oceania	2	Female	27	Age-standardized	1048	COVID-19	3	Rate	2020	12.5131	25.2994	4.051
1	Deaths	21	Oceania	3	Both	27	Age-standardized	1048	COVID-19	3	Rate	2020	18.3105	37.2286	5.77338
1	Deaths	134	Tropical Latin America	1	Male	27	Age-standardized	1048	COVID-19	3	Rate	2020	114.675	126.984	103.718
1	Deaths	134	Tropical Latin America	2	Female	27	Age-standardized	1048	COVID-19	3	Rate	2020	57.6722	63.2744	52.2456
1	Deaths	134	Tropical Latin America	3	Both	27	Age-standardized	1048	COVID-19	3	Rate	2020	82.467	89.5882	76.4856
1	Deaths	73	Western Europe	1	Male	27	Age-standardized	1048	COVID-19	3	Rate	2020	52.6634	54.4807	50.7614
1	Deaths	73	Western Europe	2	Female	27	Age-standardized	1048	COVID-19	3	Rate	2020	28.0595	28.9278	27.1061
1	Deaths	73	Western Europe	3	Both	27	Age-standardized	1048	COVID-19	3	Rate	2020	38.9833	40.1943	37.6614
1	Deaths	32	Central Asia	1	Male	27	Age-standardized	1048	COVID-19	3	Rate	2020	170.537	207.917	126.408
1	Deaths	32	Central Asia	2	Female	27	Age-standardized	1048	COVID-19	3	Rate	2020	89.8335	109.755	66.8468
1	Deaths	32	Central Asia	3	Both	27	Age-standardized	1048	COVID-19	3	Rate	2020	122.711	149.568	91.1314
1	Deaths	70	Australasia	1	Male	27	Age-standardized	1048	COVID-19	3	Rate	2020	2.27074	2.37826	2.16245
1	Deaths	70	Australasia	2	Female	27	Age-standardized	1048	COVID-19	3	Rate	2020	1.24576	1.30539	1.17836
1	Deaths	70	Australasia	3	Both	27	Age-standardized	1048	COVID-19	3	Rate	2020	1.69374	1.76653	1.61172
1	Deaths	167	Central Sub-Saharan Africa	1	Male	27	Age-standardized	1048	COVID-19	3	Rate	2020	230.573	255.762	208.444
1	Deaths	167	Central Sub-Saharan Africa	2	Female	27	Age-standardized	1048	COVID-19	3	Rate	2020	118.98	131.998	107.654
1	Deaths	167	Central Sub-Saharan Africa	3	Both	27	Age-standardized	1048	COVID-19	3	Rate	2020	165.903	184.056	150.033
1	Deaths	120	Andean Latin America	1	Male	27	Age-standardized	1048	COVID-19	3	Rate	2020	389.321	453.81	333.348
1	Deaths	120	Andean Latin America	2	Female	27	Age-standardized	1048	COVID-19	3	Rate	2020	190.265	228.42	156.39
1	Deaths	120	Andean Latin America	3	Both	27	Age-standardized	1048	COVID-19	3	Rate	2020	284.668	330.387	246.275
1	Deaths	9	Southeast Asia	1	Male	27	Age-standardized	1048	COVID-19	3	Rate	2020	27.2315	52.97	10.6387
1	Deaths	9	Southeast Asia	2	Female	27	Age-standardized	1048	COVID-19	3	Rate	2020	13.4805	25.776	5.72361
1	Deaths	9	Southeast Asia	3	Both	27	Age-standardized	1048	COVID-19	3	Rate	2020	19.6755	38.0614	7.80257
1	Deaths	56	Eastern Europe	1	Male	27	Age-standardized	1048	COVID-19	3	Rate	2020	91.8385	111.424	74.3109
1	Deaths	56	Eastern Europe	2	Female	27	Age-standardized	1048	COVID-19	3	Rate	2020	46.8577	56.4127	38.4091
1	Deaths	56	Eastern Europe	3	Both	27	Age-standardized	1048	COVID-19	3	Rate	2020	62.8347	72.9503	54.0993
1	Deaths	42	Central Europe	1	Male	27	Age-standardized	1048	COVID-19	3	Rate	2020	102.785	125.911	78.7217
1	Deaths	42	Central Europe	2	Female	27	Age-standardized	1048	COVID-19	3	Rate	2020	50.5641	61.3471	40.0018
1	Deaths	42	Central Europe	3	Both	27	Age-standardized	1048	COVID-19	3	Rate	2020	72.075	87.8264	56.2219
1	Deaths	174	Eastern Sub-Saharan Africa	1	Male	27	Age-standardized	1048	COVID-19	3	Rate	2020	210.722	227.985	196.041
1	Deaths	174	Eastern Sub-Saharan Africa	2	Female	27	Age-standardized	1048	COVID-19	3	Rate	2020	107.701	116.529	99.55
1	Deaths	174	Eastern Sub-Saharan Africa	3	Both	27	Age-standardized	1048	COVID-19	3	Rate	2020	155.13	167.909	144.063
1	Deaths	5	East Asia	1	Male	27	Age-standardized	1048	COVID-19	3	Rate	2020	2.04425	10.1655	0.427958
1	Deaths	5	East Asia	2	Female	27	Age-standardized	1048	COVID-19	3	Rate	2020	1.01007	5.0665	0.21395
1	Deaths	5	East Asia	3	Both	27	Age-standardized	1048	COVID-19	3	Rate	2020	1.45702	7.3107	0.309517
1	Deaths	96	Southern Latin America	1	Male	27	Age-standardized	1048	COVID-19	3	Rate	2020	102.658	106.196	99.1858
1	Deaths	96	Southern Latin America	2	Female	27	Age-standardized	1048	COVID-19	3	Rate	2020	52.61	54.329	50.9935
1	Deaths	96	Southern Latin America	3	Both	27	Age-standardized	1048	COVID-19	3	Rate	2020	74.0987	76.4465	71.8721
1	Deaths	199	Western Sub-Saharan Africa	1	Male	27	Age-standardized	1048	COVID-19	3	Rate	2020	177.643	193.536	161.08
1	Deaths	199	Western Sub-Saharan Africa	2	Female	27	Age-standardized	1048	COVID-19	3	Rate	2020	88.1976	96.0819	80.0284
1	Deaths	199	Western Sub-Saharan Africa	3	Both	27	Age-standardized	1048	COVID-19	3	Rate	2020	130.466	142.141	118.331
1	Deaths	104	Caribbean	1	Male	27	Age-standardized	1048	COVID-19	3	Rate	2020	53.0029	85.2768	29.4151
1	Deaths	104	Caribbean	2	Female	27	Age-standardized	1048	COVID-19	3	Rate	2020	24.8887	40.0654	13.5208
1	Deaths	104	Caribbean	3	Both	27	Age-standardized	1048	COVID-19	3	Rate	2020	37.9724	61.2154	21.0465
1	Deaths	100	High-income North America	1	Male	27	Age-standardized	1048	COVID-19	3	Rate	2020	94.4726	97.7875	91.2209
1	Deaths	100	High-income North America	2	Female	27	Age-standardized	1048	COVID-19	3	Rate	2020	53.6305	55.462	51.7821
1	Deaths	100	High-income North America	3	Both	27	Age-standardized	1048	COVID-19	3	Rate	2020	72.7719	75.3187	70.2957
1	Deaths	124	Central Latin America	1	Male	27	Age-standardized	1048	COVID-19	3	Rate	2020	236.069	275.544	196.071
1	Deaths	124	Central Latin America	2	Female	27	Age-standardized	1048	COVID-19	3	Rate	2020	115.75	136.605	94.1808
1	Deaths	124	Central Latin America	3	Both	27	Age-standardized	1048	COVID-19	3	Rate	2020	171.015	195.361	147.298
1	Deaths	138	North Africa and Middle East	1	Male	27	Age-standardized	1048	COVID-19	3	Rate	2020	160.096	178.265	137.785
1	Deaths	138	North Africa and Middle East	2	Female	27	Age-standardized	1048	COVID-19	3	Rate	2020	87.2042	96.3933	76.0803
1	Deaths	138	North Africa and Middle East	3	Both	27	Age-standardized	1048	COVID-19	3	Rate	2020	123.904	137.353	107.097
1	Deaths	42	Central Europe	1	Male	27	Age-standardized	1048	COVID-19	3	Rate	2021	188.007	227.427	146.735
1	Deaths	42	Central Europe	2	Female	27	Age-standardized	1048	COVID-19	3	Rate	2021	99.3684	119.846	76.9258
1	Deaths	42	Central Europe	3	Both	27	Age-standardized	1048	COVID-19	3	Rate	2021	136.318	164.503	106.878
1	Deaths	21	Oceania	1	Male	27	Age-standardized	1048	COVID-19	3	Rate	2021	220.187	426.165	60.6281
1	Deaths	21	Oceania	2	Female	27	Age-standardized	1048	COVID-19	3	Rate	2021	109.994	212.077	33.17
1	Deaths	21	Oceania	3	Both	27	Age-standardized	1048	COVID-19	3	Rate	2021	165.607	320.154	47.0935
1	Deaths	56	Eastern Europe	1	Male	27	Age-standardized	1048	COVID-19	3	Rate	2021	257.075	308.252	211.012
1	Deaths	56	Eastern Europe	2	Female	27	Age-standardized	1048	COVID-19	3	Rate	2021	152.751	181.411	127.994
1	Deaths	56	Eastern Europe	3	Both	27	Age-standardized	1048	COVID-19	3	Rate	2021	191.696	217.329	166.376
1	Deaths	120	Andean Latin America	1	Male	27	Age-standardized	1048	COVID-19	3	Rate	2021	427.333	446.83	404.373
1	Deaths	120	Andean Latin America	2	Female	27	Age-standardized	1048	COVID-19	3	Rate	2021	220.038	230.228	208.05
1	Deaths	120	Andean Latin America	3	Both	27	Age-standardized	1048	COVID-19	3	Rate	2021	317.334	331.913	300.149
1	Deaths	73	Western Europe	1	Male	27	Age-standardized	1048	COVID-19	3	Rate	2021	57.0314	58.8629	55.3195
1	Deaths	73	Western Europe	2	Female	27	Age-standardized	1048	COVID-19	3	Rate	2021	29.3768	30.2049	28.5494
1	Deaths	73	Western Europe	3	Both	27	Age-standardized	1048	COVID-19	3	Rate	2021	41.6468	42.857	40.5244
1	Deaths	192	Southern Sub-Saharan Africa	1	Male	27	Age-standardized	1048	COVID-19	3	Rate	2021	591.249	614.949	560.043
1	Deaths	192	Southern Sub-Saharan Africa	2	Female	27	Age-standardized	1048	COVID-19	3	Rate	2021	310.266	322.193	294.526
1	Deaths	192	Southern Sub-Saharan Africa	3	Both	27	Age-standardized	1048	COVID-19	3	Rate	2021	420.681	437.35	398.712
1	Deaths	167	Central Sub-Saharan Africa	1	Male	27	Age-standardized	1048	COVID-19	3	Rate	2021	371.167	438.257	321.941
1	Deaths	167	Central Sub-Saharan Africa	2	Female	27	Age-standardized	1048	COVID-19	3	Rate	2021	191.283	225.811	166.135
1	Deaths	167	Central Sub-Saharan Africa	3	Both	27	Age-standardized	1048	COVID-19	3	Rate	2021	266.454	314.571	231.285
1	Deaths	159	South Asia	1	Male	27	Age-standardized	1048	COVID-19	3	Rate	2021	211.112	220.834	203.525
1	Deaths	159	South Asia	2	Female	27	Age-standardized	1048	COVID-19	3	Rate	2021	107.364	112.243	103.335
1	Deaths	159	South Asia	3	Both	27	Age-standardized	1048	COVID-19	3	Rate	2021	156.523	163.703	150.871
1	Deaths	134	Tropical Latin America	1	Male	27	Age-standardized	1048	COVID-19	3	Rate	2021	229.974	250.488	209.604
1	Deaths	134	Tropical Latin America	2	Female	27	Age-standardized	1048	COVID-19	3	Rate	2021	126.474	139.533	114.543
1	Deaths	134	Tropical Latin America	3	Both	27	Age-standardized	1048	COVID-19	3	Rate	2021	171.858	183.113	160.774
1	Deaths	9	Southeast Asia	1	Male	27	Age-standardized	1048	COVID-19	3	Rate	2021	137.938	215.888	97.6941
1	Deaths	9	Southeast Asia	2	Female	27	Age-standardized	1048	COVID-19	3	Rate	2021	69.1904	108.319	49.1032
1	Deaths	9	Southeast Asia	3	Both	27	Age-standardized	1048	COVID-19	3	Rate	2021	99.7081	156.149	70.6392
1	Deaths	65	High-income Asia Pacific	1	Male	27	Age-standardized	1048	COVID-19	3	Rate	2021	7.28409	8.11937	6.54457
1	Deaths	65	High-income Asia Pacific	2	Female	27	Age-standardized	1048	COVID-19	3	Rate	2021	3.04753	3.37057	2.75173
1	Deaths	65	High-income Asia Pacific	3	Both	27	Age-standardized	1048	COVID-19	3	Rate	2021	4.88258	5.34197	4.46332
1	Deaths	174	Eastern Sub-Saharan Africa	1	Male	27	Age-standardized	1048	COVID-19	3	Rate	2021	424.224	456.524	382.408
1	Deaths	174	Eastern Sub-Saharan Africa	2	Female	27	Age-standardized	1048	COVID-19	3	Rate	2021	222.835	241.171	199.045
1	Deaths	174	Eastern Sub-Saharan Africa	3	Both	27	Age-standardized	1048	COVID-19	3	Rate	2021	315.199	339.661	282.999
1	Deaths	70	Australasia	1	Male	27	Age-standardized	1048	COVID-19	3	Rate	2021	7.85239	9.19236	6.37534
1	Deaths	70	Australasia	2	Female	27	Age-standardized	1048	COVID-19	3	Rate	2021	4.33662	5.07805	3.52064
1	Deaths	70	Australasia	3	Both	27	Age-standardized	1048	COVID-19	3	Rate	2021	5.95452	6.97145	4.83397
1	Deaths	32	Central Asia	1	Male	27	Age-standardized	1048	COVID-19	3	Rate	2021	214.898	258.111	161.001
1	Deaths	32	Central Asia	2	Female	27	Age-standardized	1048	COVID-19	3	Rate	2021	117.061	140.408	89.1695
1	Deaths	32	Central Asia	3	Both	27	Age-standardized	1048	COVID-19	3	Rate	2021	157.285	188.561	118.344
1	Deaths	5	East Asia	1	Male	27	Age-standardized	1048	COVID-19	3	Rate	2021	0.345105	1.1825	0.0857345
1	Deaths	5	East Asia	2	Female	27	Age-standardized	1048	COVID-19	3	Rate	2021	0.118735	0.404619	0.0264165
1	Deaths	5	East Asia	3	Both	27	Age-standardized	1048	COVID-19	3	Rate	2021	0.191361	0.651762	0.0447942
1	Deaths	199	Western Sub-Saharan Africa	1	Male	27	Age-standardized	1048	COVID-19	3	Rate	2021	257.822	278.804	232.527
1	Deaths	199	Western Sub-Saharan Africa	2	Female	27	Age-standardized	1048	COVID-19	3	Rate	2021	130.652	140.821	117.827
1	Deaths	199	Western Sub-Saharan Africa	3	Both	27	Age-standardized	1048	COVID-19	3	Rate	2021	190.259	205.432	171.532
1	Deaths	138	North Africa and Middle East	1	Male	27	Age-standardized	1048	COVID-19	3	Rate	2021	227.317	251.455	200.164
1	Deaths	138	North Africa and Middle East	2	Female	27	Age-standardized	1048	COVID-19	3	Rate	2021	117.235	130.19	103.909
1	Deaths	138	North Africa and Middle East	3	Both	27	Age-standardized	1048	COVID-19	3	Rate	2021	172.438	190.779	151.894
1	Deaths	104	Caribbean	1	Male	27	Age-standardized	1048	COVID-19	3	Rate	2021	216.202	288.593	161.152
1	Deaths	104	Caribbean	2	Female	27	Age-standardized	1048	COVID-19	3	Rate	2021	110.084	146.453	82.6458
1	Deaths	104	Caribbean	3	Both	27	Age-standardized	1048	COVID-19	3	Rate	2021	158.957	212.258	118.736
1	Deaths	96	Southern Latin America	1	Male	27	Age-standardized	1048	COVID-19	3	Rate	2021	165.515	167.619	163.326
1	Deaths	96	Southern Latin America	2	Female	27	Age-standardized	1048	COVID-19	3	Rate	2021	88.0105	89.0121	87.1127
1	Deaths	96	Southern Latin America	3	Both	27	Age-standardized	1048	COVID-19	3	Rate	2021	121.392	122.634	120.138
1	Deaths	124	Central Latin America	1	Male	27	Age-standardized	1048	COVID-19	3	Rate	2021	265.679	316.754	217.157
1	Deaths	124	Central Latin America	2	Female	27	Age-standardized	1048	COVID-19	3	Rate	2021	142.55	172.562	116.477
1	Deaths	124	Central Latin America	3	Both	27	Age-standardized	1048	COVID-19	3	Rate	2021	198.526	231.195	170.256
1	Deaths	100	High-income North America	1	Male	27	Age-standardized	1048	COVID-19	3	Rate	2021	104.721	106.96	102.705
1	Deaths	100	High-income North America	2	Female	27	Age-standardized	1048	COVID-19	3	Rate	2021	59.0724	60.3291	57.9281
1	Deaths	100	High-income North America	3	Both	27	Age-standardized	1048	COVID-19	3	Rate	2021	80.4626	82.1743	78.9145
2	DALYs (Disability-Adjusted Life Years)	138	North Africa and Middle East	1	Male	27	Age-standardized	1048	COVID-19	3	Rate	2020	3589.87	4031.42	3093.08
2	DALYs (Disability-Adjusted Life Years)	138	North Africa and Middle East	2	Female	27	Age-standardized	1048	COVID-19	3	Rate	2020	1935.11	2192.43	1680.74
2	DALYs (Disability-Adjusted Life Years)	138	North Africa and Middle East	3	Both	27	Age-standardized	1048	COVID-19	3	Rate	2020	2778.67	3127.27	2416.26
2	DALYs (Disability-Adjusted Life Years)	65	High-income Asia Pacific	1	Male	27	Age-standardized	1048	COVID-19	3	Rate	2020	26.9617	33.1338	21.7984
2	DALYs (Disability-Adjusted Life Years)	65	High-income Asia Pacific	2	Female	27	Age-standardized	1048	COVID-19	3	Rate	2020	15.9199	20.9034	12.6163
2	DALYs (Disability-Adjusted Life Years)	65	High-income Asia Pacific	3	Both	27	Age-standardized	1048	COVID-19	3	Rate	2020	20.8595	26.0617	17.0977
2	DALYs (Disability-Adjusted Life Years)	21	Oceania	1	Male	27	Age-standardized	1048	COVID-19	3	Rate	2020	548.507	1126.37	158.433
2	DALYs (Disability-Adjusted Life Years)	21	Oceania	2	Female	27	Age-standardized	1048	COVID-19	3	Rate	2020	287.698	584.919	87.5622
2	DALYs (Disability-Adjusted Life Years)	21	Oceania	3	Both	27	Age-standardized	1048	COVID-19	3	Rate	2020	421.357	861.875	123.646
2	DALYs (Disability-Adjusted Life Years)	5	East Asia	1	Male	27	Age-standardized	1048	COVID-19	3	Rate	2020	42.7496	215.047	9.92308
2	DALYs (Disability-Adjusted Life Years)	5	East Asia	2	Female	27	Age-standardized	1048	COVID-19	3	Rate	2020	21.6075	105.512	5.31579
2	DALYs (Disability-Adjusted Life Years)	5	East Asia	3	Both	27	Age-standardized	1048	COVID-19	3	Rate	2020	31.5185	157.373	7.4549
2	DALYs (Disability-Adjusted Life Years)	134	Tropical Latin America	1	Male	27	Age-standardized	1048	COVID-19	3	Rate	2020	2742.59	3064.97	2469.89
2	DALYs (Disability-Adjusted Life Years)	134	Tropical Latin America	2	Female	27	Age-standardized	1048	COVID-19	3	Rate	2020	1455.74	1649.81	1294.7
2	DALYs (Disability-Adjusted Life Years)	134	Tropical Latin America	3	Both	27	Age-standardized	1048	COVID-19	3	Rate	2020	2040.21	2241.72	1865.42
2	DALYs (Disability-Adjusted Life Years)	42	Central Europe	1	Male	27	Age-standardized	1048	COVID-19	3	Rate	2020	2242.13	2749.37	1708.26
2	DALYs (Disability-Adjusted Life Years)	42	Central Europe	2	Female	27	Age-standardized	1048	COVID-19	3	Rate	2020	1105.25	1348.11	872.497
2	DALYs (Disability-Adjusted Life Years)	42	Central Europe	3	Both	27	Age-standardized	1048	COVID-19	3	Rate	2020	1610.27	1966.31	1264.08
2	DALYs (Disability-Adjusted Life Years)	100	High-income North America	1	Male	27	Age-standardized	1048	COVID-19	3	Rate	2020	2601.57	2704.42	2501.47
2	DALYs (Disability-Adjusted Life Years)	100	High-income North America	2	Female	27	Age-standardized	1048	COVID-19	3	Rate	2020	1292.41	1362.23	1233.96
2	DALYs (Disability-Adjusted Life Years)	100	High-income North America	3	Both	27	Age-standardized	1048	COVID-19	3	Rate	2020	1927.7	2006.67	1850.72
2	DALYs (Disability-Adjusted Life Years)	9	Southeast Asia	1	Male	27	Age-standardized	1048	COVID-19	3	Rate	2020	705.005	1341.37	302.188
2	DALYs (Disability-Adjusted Life Years)	9	Southeast Asia	2	Female	27	Age-standardized	1048	COVID-19	3	Rate	2020	364.551	657.302	178.159
2	DALYs (Disability-Adjusted Life Years)	9	Southeast Asia	3	Both	27	Age-standardized	1048	COVID-19	3	Rate	2020	524.109	979.779	229.565
2	DALYs (Disability-Adjusted Life Years)	70	Australasia	1	Male	27	Age-standardized	1048	COVID-19	3	Rate	2020	40.648	42.9486	38.395
2	DALYs (Disability-Adjusted Life Years)	70	Australasia	2	Female	27	Age-standardized	1048	COVID-19	3	Rate	2020	23.7861	26.1036	22.064
2	DALYs (Disability-Adjusted Life Years)	70	Australasia	3	Both	27	Age-standardized	1048	COVID-19	3	Rate	2020	31.5248	33.6011	29.7184
2	DALYs (Disability-Adjusted Life Years)	124	Central Latin America	1	Male	27	Age-standardized	1048	COVID-19	3	Rate	2020	5914.24	7003.67	4898.6
2	DALYs (Disability-Adjusted Life Years)	124	Central Latin America	2	Female	27	Age-standardized	1048	COVID-19	3	Rate	2020	2876.09	3407.11	2344.75
2	DALYs (Disability-Adjusted Life Years)	124	Central Latin America	3	Both	27	Age-standardized	1048	COVID-19	3	Rate	2020	4292.49	4923.69	3667.88
2	DALYs (Disability-Adjusted Life Years)	96	Southern Latin America	1	Male	27	Age-standardized	1048	COVID-19	3	Rate	2020	2262.44	2347.23	2186.52
2	DALYs (Disability-Adjusted Life Years)	96	Southern Latin America	2	Female	27	Age-standardized	1048	COVID-19	3	Rate	2020	1123.98	1190.4	1074.91
2	DALYs (Disability-Adjusted Life Years)	96	Southern Latin America	3	Both	27	Age-standardized	1048	COVID-19	3	Rate	2020	1638.38	1703.83	1582.13
2	DALYs (Disability-Adjusted Life Years)	159	South Asia	1	Male	27	Age-standardized	1048	COVID-19	3	Rate	2020	3195.36	3415.81	2980.35
2	DALYs (Disability-Adjusted Life Years)	159	South Asia	2	Female	27	Age-standardized	1048	COVID-19	3	Rate	2020	1629.83	1820.6	1500.58
2	DALYs (Disability-Adjusted Life Years)	159	South Asia	3	Both	27	Age-standardized	1048	COVID-19	3	Rate	2020	2395.44	2588.22	2223.2
2	DALYs (Disability-Adjusted Life Years)	167	Central Sub-Saharan Africa	1	Male	27	Age-standardized	1048	COVID-19	3	Rate	2020	5312.57	5885.66	4775.47
2	DALYs (Disability-Adjusted Life Years)	167	Central Sub-Saharan Africa	2	Female	27	Age-standardized	1048	COVID-19	3	Rate	2020	2731.21	3067.73	2427.64
2	DALYs (Disability-Adjusted Life Years)	167	Central Sub-Saharan Africa	3	Both	27	Age-standardized	1048	COVID-19	3	Rate	2020	3891.28	4318.01	3486.08
2	DALYs (Disability-Adjusted Life Years)	56	Eastern Europe	1	Male	27	Age-standardized	1048	COVID-19	3	Rate	2020	2098.08	2570.65	1677.4
2	DALYs (Disability-Adjusted Life Years)	56	Eastern Europe	2	Female	27	Age-standardized	1048	COVID-19	3	Rate	2020	1114.59	1345.09	899.87
2	DALYs (Disability-Adjusted Life Years)	56	Eastern Europe	3	Both	27	Age-standardized	1048	COVID-19	3	Rate	2020	1504.12	1747.24	1276.65
2	DALYs (Disability-Adjusted Life Years)	32	Central Asia	1	Male	27	Age-standardized	1048	COVID-19	3	Rate	2020	3837.37	4704.02	2845.95
2	DALYs (Disability-Adjusted Life Years)	32	Central Asia	2	Female	27	Age-standardized	1048	COVID-19	3	Rate	2020	1999.67	2425.2	1530.93
2	DALYs (Disability-Adjusted Life Years)	32	Central Asia	3	Both	27	Age-standardized	1048	COVID-19	3	Rate	2020	2800.48	3410.35	2100.82
2	DALYs (Disability-Adjusted Life Years)	199	Western Sub-Saharan Africa	1	Male	27	Age-standardized	1048	COVID-19	3	Rate	2020	4114.07	4495.74	3726
2	DALYs (Disability-Adjusted Life Years)	199	Western Sub-Saharan Africa	2	Female	27	Age-standardized	1048	COVID-19	3	Rate	2020	2066.73	2337.06	1862.96
2	DALYs (Disability-Adjusted Life Years)	199	Western Sub-Saharan Africa	3	Both	27	Age-standardized	1048	COVID-19	3	Rate	2020	3039.44	3335.42	2752.64
2	DALYs (Disability-Adjusted Life Years)	104	Caribbean	1	Male	27	Age-standardized	1048	COVID-19	3	Rate	2020	1369.39	2209.62	753.734
2	DALYs (Disability-Adjusted Life Years)	104	Caribbean	2	Female	27	Age-standardized	1048	COVID-19	3	Rate	2020	682.737	1094.82	398.8
2	DALYs (Disability-Adjusted Life Years)	104	Caribbean	3	Both	27	Age-standardized	1048	COVID-19	3	Rate	2020	1009.65	1616.92	572.594
2	DALYs (Disability-Adjusted Life Years)	174	Eastern Sub-Saharan Africa	1	Male	27	Age-standardized	1048	COVID-19	3	Rate	2020	4870.58	5269.4	4545.32
2	DALYs (Disability-Adjusted Life Years)	174	Eastern Sub-Saharan Africa	2	Female	27	Age-standardized	1048	COVID-19	3	Rate	2020	2445.63	2658.48	2253.98
2	DALYs (Disability-Adjusted Life Years)	174	Eastern Sub-Saharan Africa	3	Both	27	Age-standardized	1048	COVID-19	3	Rate	2020	3595.8	3882.69	3343.51
2	DALYs (Disability-Adjusted Life Years)	120	Andean Latin America	1	Male	27	Age-standardized	1048	COVID-19	3	Rate	2020	9100.81	10636	7735.1
2	DALYs (Disability-Adjusted Life Years)	120	Andean Latin America	2	Female	27	Age-standardized	1048	COVID-19	3	Rate	2020	4509.68	5453.32	3704.92
2	DALYs (Disability-Adjusted Life Years)	120	Andean Latin America	3	Both	27	Age-standardized	1048	COVID-19	3	Rate	2020	6719.2	7811.69	5787.89
2	DALYs (Disability-Adjusted Life Years)	73	Western Europe	1	Male	27	Age-standardized	1048	COVID-19	3	Rate	2020	1107.77	1154.21	1064.49
2	DALYs (Disability-Adjusted Life Years)	73	Western Europe	2	Female	27	Age-standardized	1048	COVID-19	3	Rate	2020	583.817	633.354	547.406
2	DALYs (Disability-Adjusted Life Years)	73	Western Europe	3	Both	27	Age-standardized	1048	COVID-19	3	Rate	2020	828.359	872.423	792.563
2	DALYs (Disability-Adjusted Life Years)	192	Southern Sub-Saharan Africa	1	Male	27	Age-standardized	1048	COVID-19	3	Rate	2020	8003.91	8144	7867.2
2	DALYs (Disability-Adjusted Life Years)	192	Southern Sub-Saharan Africa	2	Female	27	Age-standardized	1048	COVID-19	3	Rate	2020	4086.03	4213.52	3984.96
2	DALYs (Disability-Adjusted Life Years)	192	Southern Sub-Saharan Africa	3	Both	27	Age-standardized	1048	COVID-19	3	Rate	2020	5744.82	5867.11	5633.56
2	DALYs (Disability-Adjusted Life Years)	9	Southeast Asia	1	Male	27	Age-standardized	1048	COVID-19	3	Rate	2021	3373.03	5213.58	2380.09
2	DALYs (Disability-Adjusted Life Years)	9	Southeast Asia	2	Female	27	Age-standardized	1048	COVID-19	3	Rate	2021	1769.34	2658.74	1243.83
2	DALYs (Disability-Adjusted Life Years)	9	Southeast Asia	3	Both	27	Age-standardized	1048	COVID-19	3	Rate	2021	2515.25	3850.19	1774.4
2	DALYs (Disability-Adjusted Life Years)	5	East Asia	1	Male	27	Age-standardized	1048	COVID-19	3	Rate	2021	4.4496	14.7334	1.16192
2	DALYs (Disability-Adjusted Life Years)	5	East Asia	2	Female	27	Age-standardized	1048	COVID-19	3	Rate	2021	1.92646	5.92568	0.55847
2	DALYs (Disability-Adjusted Life Years)	5	East Asia	3	Both	27	Age-standardized	1048	COVID-19	3	Rate	2021	2.8406	9.17325	0.766421
2	DALYs (Disability-Adjusted Life Years)	65	High-income Asia Pacific	1	Male	27	Age-standardized	1048	COVID-19	3	Rate	2021	165.489	190.524	147.828
2	DALYs (Disability-Adjusted Life Years)	65	High-income Asia Pacific	2	Female	27	Age-standardized	1048	COVID-19	3	Rate	2021	88.2897	118.887	70.9368
2	DALYs (Disability-Adjusted Life Years)	65	High-income Asia Pacific	3	Both	27	Age-standardized	1048	COVID-19	3	Rate	2021	123.763	149.667	107.607
2	DALYs (Disability-Adjusted Life Years)	56	Eastern Europe	1	Male	27	Age-standardized	1048	COVID-19	3	Rate	2021	6170.27	7542.09	4931.59
2	DALYs (Disability-Adjusted Life Years)	56	Eastern Europe	2	Female	27	Age-standardized	1048	COVID-19	3	Rate	2021	3724.24	4483.59	3056.73
2	DALYs (Disability-Adjusted Life Years)	56	Eastern Europe	3	Both	27	Age-standardized	1048	COVID-19	3	Rate	2021	4712.68	5450.71	3952.79
2	DALYs (Disability-Adjusted Life Years)	104	Caribbean	1	Male	27	Age-standardized	1048	COVID-19	3	Rate	2021	5017.85	6900.47	3661.6
2	DALYs (Disability-Adjusted Life Years)	104	Caribbean	2	Female	27	Age-standardized	1048	COVID-19	3	Rate	2021	2537.11	3455.04	1859.63
2	DALYs (Disability-Adjusted Life Years)	104	Caribbean	3	Both	27	Age-standardized	1048	COVID-19	3	Rate	2021	3710.61	5092.55	2719.87
2	DALYs (Disability-Adjusted Life Years)	96	Southern Latin America	1	Male	27	Age-standardized	1048	COVID-19	3	Rate	2021	3741.97	3863.78	3663.76
2	DALYs (Disability-Adjusted Life Years)	96	Southern Latin America	2	Female	27	Age-standardized	1048	COVID-19	3	Rate	2021	1941.78	2119.33	1853.46
2	DALYs (Disability-Adjusted Life Years)	96	Southern Latin America	3	Both	27	Age-standardized	1048	COVID-19	3	Rate	2021	2758.91	2899.79	2681.61
2	DALYs (Disability-Adjusted Life Years)	42	Central Europe	1	Male	27	Age-standardized	1048	COVID-19	3	Rate	2021	4356.5	5243.57	3422.43
2	DALYs (Disability-Adjusted Life Years)	42	Central Europe	2	Female	27	Age-standardized	1048	COVID-19	3	Rate	2021	2457.96	3020.31	1927.37
2	DALYs (Disability-Adjusted Life Years)	42	Central Europe	3	Both	27	Age-standardized	1048	COVID-19	3	Rate	2021	3303.48	3975.72	2633.43
2	DALYs (Disability-Adjusted Life Years)	167	Central Sub-Saharan Africa	1	Male	27	Age-standardized	1048	COVID-19	3	Rate	2021	8596.58	10079.5	7440.93
2	DALYs (Disability-Adjusted Life Years)	167	Central Sub-Saharan Africa	2	Female	27	Age-standardized	1048	COVID-19	3	Rate	2021	4502.64	5333.75	3809.37
2	DALYs (Disability-Adjusted Life Years)	167	Central Sub-Saharan Africa	3	Both	27	Age-standardized	1048	COVID-19	3	Rate	2021	6333.55	7395.46	5441.27
2	DALYs (Disability-Adjusted Life Years)	134	Tropical Latin America	1	Male	27	Age-standardized	1048	COVID-19	3	Rate	2021	6022.23	6614.73	5473.71
2	DALYs (Disability-Adjusted Life Years)	134	Tropical Latin America	2	Female	27	Age-standardized	1048	COVID-19	3	Rate	2021	3572.96	4137.51	3225.31
2	DALYs (Disability-Adjusted Life Years)	134	Tropical Latin America	3	Both	27	Age-standardized	1048	COVID-19	3	Rate	2021	4691.27	5159.43	4356.12
2	DALYs (Disability-Adjusted Life Years)	192	Southern Sub-Saharan Africa	1	Male	27	Age-standardized	1048	COVID-19	3	Rate	2021	13784.2	14470	12930.6
2	DALYs (Disability-Adjusted Life Years)	192	Southern Sub-Saharan Africa	2	Female	27	Age-standardized	1048	COVID-19	3	Rate	2021	7123.17	7691.03	6629.12
2	DALYs (Disability-Adjusted Life Years)	192	Southern Sub-Saharan Africa	3	Both	27	Age-standardized	1048	COVID-19	3	Rate	2021	9952.56	10560.8	9312.19
2	DALYs (Disability-Adjusted Life Years)	32	Central Asia	1	Male	27	Age-standardized	1048	COVID-19	3	Rate	2021	5051.61	6134.22	3846.91
2	DALYs (Disability-Adjusted Life Years)	32	Central Asia	2	Female	27	Age-standardized	1048	COVID-19	3	Rate	2021	2777.64	3450.81	2163.53
2	DALYs (Disability-Adjusted Life Years)	32	Central Asia	3	Both	27	Age-standardized	1048	COVID-19	3	Rate	2021	3776.15	4602.6	2919.53
2	DALYs (Disability-Adjusted Life Years)	73	Western Europe	1	Male	27	Age-standardized	1048	COVID-19	3	Rate	2021	1284.93	1382.18	1220.02
2	DALYs (Disability-Adjusted Life Years)	73	Western Europe	2	Female	27	Age-standardized	1048	COVID-19	3	Rate	2021	704.848	837.541	629.95
2	DALYs (Disability-Adjusted Life Years)	73	Western Europe	3	Both	27	Age-standardized	1048	COVID-19	3	Rate	2021	975.624	1084.93	909.434
2	DALYs (Disability-Adjusted Life Years)	21	Oceania	1	Male	27	Age-standardized	1048	COVID-19	3	Rate	2021	5234.5	10092.6	1727.92
2	DALYs (Disability-Adjusted Life Years)	21	Oceania	2	Female	27	Age-standardized	1048	COVID-19	3	Rate	2021	2661.76	5100.09	957.506
2	DALYs (Disability-Adjusted Life Years)	21	Oceania	3	Both	27	Age-standardized	1048	COVID-19	3	Rate	2021	3979.92	7665.59	1415.16
2	DALYs (Disability-Adjusted Life Years)	138	North Africa and Middle East	1	Male	27	Age-standardized	1048	COVID-19	3	Rate	2021	5207.15	5818	4614.05
2	DALYs (Disability-Adjusted Life Years)	138	North Africa and Middle East	2	Female	27	Age-standardized	1048	COVID-19	3	Rate	2021	2783.65	3222.65	2438.73
2	DALYs (Disability-Adjusted Life Years)	138	North Africa and Middle East	3	Both	27	Age-standardized	1048	COVID-19	3	Rate	2021	4015.87	4514.41	3561.3
2	DALYs (Disability-Adjusted Life Years)	70	Australasia	1	Male	27	Age-standardized	1048	COVID-19	3	Rate	2021	164.796	192.844	134.111
2	DALYs (Disability-Adjusted Life Years)	70	Australasia	2	Female	27	Age-standardized	1048	COVID-19	3	Rate	2021	87.3427	102.305	71.3871
2	DALYs (Disability-Adjusted Life Years)	70	Australasia	3	Both	27	Age-standardized	1048	COVID-19	3	Rate	2021	124.202	145.597	101.395
2	DALYs (Disability-Adjusted Life Years)	199	Western Sub-Saharan Africa	1	Male	27	Age-standardized	1048	COVID-19	3	Rate	2021	6036.59	6622.98	5466.31
2	DALYs (Disability-Adjusted Life Years)	199	Western Sub-Saharan Africa	2	Female	27	Age-standardized	1048	COVID-19	3	Rate	2021	3121.86	3598.64	2784.6
2	DALYs (Disability-Adjusted Life Years)	199	Western Sub-Saharan Africa	3	Both	27	Age-standardized	1048	COVID-19	3	Rate	2021	4496.38	4973.47	4072.06
2	DALYs (Disability-Adjusted Life Years)	120	Andean Latin America	1	Male	27	Age-standardized	1048	COVID-19	3	Rate	2021	9836.8	10333.5	9235.1
2	DALYs (Disability-Adjusted Life Years)	120	Andean Latin America	2	Female	27	Age-standardized	1048	COVID-19	3	Rate	2021	5042.55	5545.42	4657.76
2	DALYs (Disability-Adjusted Life Years)	120	Andean Latin America	3	Both	27	Age-standardized	1048	COVID-19	3	Rate	2021	7337.99	7775.15	6860.88
2	DALYs (Disability-Adjusted Life Years)	174	Eastern Sub-Saharan Africa	1	Male	27	Age-standardized	1048	COVID-19	3	Rate	2021	9971.43	10750.8	8994.57
2	DALYs (Disability-Adjusted Life Years)	174	Eastern Sub-Saharan Africa	2	Female	27	Age-standardized	1048	COVID-19	3	Rate	2021	5240.14	5879.51	4638.52
2	DALYs (Disability-Adjusted Life Years)	174	Eastern Sub-Saharan Africa	3	Both	27	Age-standardized	1048	COVID-19	3	Rate	2021	7476.07	8190.62	6688.62
2	DALYs (Disability-Adjusted Life Years)	100	High-income North America	1	Male	27	Age-standardized	1048	COVID-19	3	Rate	2021	2952.47	3095.71	2862.62
2	DALYs (Disability-Adjusted Life Years)	100	High-income North America	2	Female	27	Age-standardized	1048	COVID-19	3	Rate	2021	1533.95	1742.97	1432.5
2	DALYs (Disability-Adjusted Life Years)	100	High-income North America	3	Both	27	Age-standardized	1048	COVID-19	3	Rate	2021	2221.69	2401.42	2130.83
2	DALYs (Disability-Adjusted Life Years)	124	Central Latin America	1	Male	27	Age-standardized	1048	COVID-19	3	Rate	2021	6655.04	8033.32	5355.03
2	DALYs (Disability-Adjusted Life Years)	124	Central Latin America	2	Female	27	Age-standardized	1048	COVID-19	3	Rate	2021	3655.47	4493.59	2885.21
2	DALYs (Disability-Adjusted Life Years)	124	Central Latin America	3	Both	27	Age-standardized	1048	COVID-19	3	Rate	2021	5046.91	5927.55	4286.58
2	DALYs (Disability-Adjusted Life Years)	159	South Asia	1	Male	27	Age-standardized	1048	COVID-19	3	Rate	2021	4958.27	5333.22	4713.43
2	DALYs (Disability-Adjusted Life Years)	159	South Asia	2	Female	27	Age-standardized	1048	COVID-19	3	Rate	2021	2654.69	3078.77	2405.67
2	DALYs (Disability-Adjusted Life Years)	159	South Asia	3	Both	27	Age-standardized	1048	COVID-19	3	Rate	2021	3778.09	4191.74	3536.35
6	Incidence	5	East Asia	1	Male	27	Age-standardized	1048	COVID-19	3	Rate	2020	178.033	206.467	155.063
6	Incidence	5	East Asia	2	Female	27	Age-standardized	1048	COVID-19	3	Rate	2020	177.201	205.534	154.577
6	Incidence	5	East Asia	3	Both	27	Age-standardized	1048	COVID-19	3	Rate	2020	177.542	205.854	154.809
6	Incidence	56	Eastern Europe	1	Male	27	Age-standardized	1048	COVID-19	3	Rate	2020	32781.9	36393.9	28990.6
6	Incidence	56	Eastern Europe	2	Female	27	Age-standardized	1048	COVID-19	3	Rate	2020	32807.5	36425.7	29021.3
6	Incidence	56	Eastern Europe	3	Both	27	Age-standardized	1048	COVID-19	3	Rate	2020	32795.6	36410.4	29017.2
6	Incidence	21	Oceania	1	Male	27	Age-standardized	1048	COVID-19	3	Rate	2020	1282.3	2187.18	780.874
6	Incidence	21	Oceania	2	Female	27	Age-standardized	1048	COVID-19	3	Rate	2020	1284.82	2174.65	784.168
6	Incidence	21	Oceania	3	Both	27	Age-standardized	1048	COVID-19	3	Rate	2020	1283.35	2180.84	782.081
6	Incidence	70	Australasia	1	Male	27	Age-standardized	1048	COVID-19	3	Rate	2020	272.39	321.138	233.658
6	Incidence	70	Australasia	2	Female	27	Age-standardized	1048	COVID-19	3	Rate	2020	273.028	321.924	234.167
6	Incidence	70	Australasia	3	Both	27	Age-standardized	1048	COVID-19	3	Rate	2020	272.705	321.527	233.909
6	Incidence	42	Central Europe	1	Male	27	Age-standardized	1048	COVID-19	3	Rate	2020	28156.7	30653.5	25495.3
6	Incidence	42	Central Europe	2	Female	27	Age-standardized	1048	COVID-19	3	Rate	2020	28091.5	30577.2	25433.4
6	Incidence	42	Central Europe	3	Both	27	Age-standardized	1048	COVID-19	3	Rate	2020	28121.5	30612.7	25462.1
6	Incidence	9	Southeast Asia	1	Male	27	Age-standardized	1048	COVID-19	3	Rate	2020	9100.41	9888.55	8286.72
6	Incidence	9	Southeast Asia	2	Female	27	Age-standardized	1048	COVID-19	3	Rate	2020	9022.83	9801.56	8210.47
6	Incidence	9	Southeast Asia	3	Both	27	Age-standardized	1048	COVID-19	3	Rate	2020	9060.5	9843.72	8249.7
6	Incidence	65	High-income Asia Pacific	1	Male	27	Age-standardized	1048	COVID-19	3	Rate	2020	1225.17	1309.07	1147.23
6	Incidence	65	High-income Asia Pacific	2	Female	27	Age-standardized	1048	COVID-19	3	Rate	2020	1231.07	1314.31	1152.1
6	Incidence	65	High-income Asia Pacific	3	Both	27	Age-standardized	1048	COVID-19	3	Rate	2020	1227.93	1311.36	1149.51
6	Incidence	32	Central Asia	1	Male	27	Age-standardized	1048	COVID-19	3	Rate	2020	31147.2	37346.8	22562.6
6	Incidence	32	Central Asia	2	Female	27	Age-standardized	1048	COVID-19	3	Rate	2020	30989.3	37179.1	22420.1
6	Incidence	32	Central Asia	3	Both	27	Age-standardized	1048	COVID-19	3	Rate	2020	31060.6	37232.6	22496.9
6	Incidence	100	High-income North America	1	Male	27	Age-standardized	1048	COVID-19	3	Rate	2020	16077.1	16777.8	15432.5
6	Incidence	100	High-income North America	2	Female	27	Age-standardized	1048	COVID-19	3	Rate	2020	16091.9	16788.9	15450.9
6	Incidence	100	High-income North America	3	Both	27	Age-standardized	1048	COVID-19	3	Rate	2020	16084.7	16783.6	15442.8
6	Incidence	104	Caribbean	1	Male	27	Age-standardized	1048	COVID-19	3	Rate	2020	9834.21	13615.4	5799.4
6	Incidence	104	Caribbean	2	Female	27	Age-standardized	1048	COVID-19	3	Rate	2020	9880.63	13698.2	5825.41
6	Incidence	104	Caribbean	3	Both	27	Age-standardized	1048	COVID-19	3	Rate	2020	9856.45	13647.6	5817.22
6	Incidence	120	Andean Latin America	1	Male	27	Age-standardized	1048	COVID-19	3	Rate	2020	42923.3	50186.6	35759.1
6	Incidence	120	Andean Latin America	2	Female	27	Age-standardized	1048	COVID-19	3	Rate	2020	42952.7	50239	35854.2
6	Incidence	120	Andean Latin America	3	Both	27	Age-standardized	1048	COVID-19	3	Rate	2020	42937.6	50212.3	35808.6
6	Incidence	73	Western Europe	1	Male	27	Age-standardized	1048	COVID-19	3	Rate	2020	11193.4	12301.3	10449.1
6	Incidence	73	Western Europe	2	Female	27	Age-standardized	1048	COVID-19	3	Rate	2020	11245.7	12382.5	10481.6
6	Incidence	73	Western Europe	3	Both	27	Age-standardized	1048	COVID-19	3	Rate	2020	11219.3	12343.1	10465.1
6	Incidence	124	Central Latin America	1	Male	27	Age-standardized	1048	COVID-19	3	Rate	2020	32661.8	34458.2	30778
6	Incidence	124	Central Latin America	2	Female	27	Age-standardized	1048	COVID-19	3	Rate	2020	32629.3	34424.1	30760
6	Incidence	124	Central Latin America	3	Both	27	Age-standardized	1048	COVID-19	3	Rate	2020	32644	34434.9	30772
6	Incidence	134	Tropical Latin America	1	Male	27	Age-standardized	1048	COVID-19	3	Rate	2020	29053	31457.4	26606.7
6	Incidence	134	Tropical Latin America	2	Female	27	Age-standardized	1048	COVID-19	3	Rate	2020	29014.7	31450.4	26559.6
6	Incidence	134	Tropical Latin America	3	Both	27	Age-standardized	1048	COVID-19	3	Rate	2020	29031.3	31451.6	26575.6
6	Incidence	96	Southern Latin America	1	Male	27	Age-standardized	1048	COVID-19	3	Rate	2020	10517.2	14563.2	8050.71
6	Incidence	96	Southern Latin America	2	Female	27	Age-standardized	1048	COVID-19	3	Rate	2020	10523.3	14622.1	8039.66
6	Incidence	96	Southern Latin America	3	Both	27	Age-standardized	1048	COVID-19	3	Rate	2020	10520	14593	8044.8
6	Incidence	159	South Asia	1	Male	27	Age-standardized	1048	COVID-19	3	Rate	2020	30001.9	33064.2	27437.8
6	Incidence	159	South Asia	2	Female	27	Age-standardized	1048	COVID-19	3	Rate	2020	29936.7	33032.7	27344.5
6	Incidence	159	South Asia	3	Both	27	Age-standardized	1048	COVID-19	3	Rate	2020	29969.2	33044.7	27388.6
6	Incidence	138	North Africa and Middle East	1	Male	27	Age-standardized	1048	COVID-19	3	Rate	2020	32155.2	37194.5	25387.1
6	Incidence	138	North Africa and Middle East	2	Female	27	Age-standardized	1048	COVID-19	3	Rate	2020	32301.6	37547.8	25562.8
6	Incidence	138	North Africa and Middle East	3	Both	27	Age-standardized	1048	COVID-19	3	Rate	2020	32223.4	37343.5	25486.8
6	Incidence	199	Western Sub-Saharan Africa	1	Male	27	Age-standardized	1048	COVID-19	3	Rate	2020	39956.2	42550.7	37443.5
6	Incidence	199	Western Sub-Saharan Africa	2	Female	27	Age-standardized	1048	COVID-19	3	Rate	2020	40221.8	42739.2	37836.2
6	Incidence	199	Western Sub-Saharan Africa	3	Both	27	Age-standardized	1048	COVID-19	3	Rate	2020	40094	42636.9	37650
6	Incidence	192	Southern Sub-Saharan Africa	1	Male	27	Age-standardized	1048	COVID-19	3	Rate	2020	28834	31441.7	25992.9
6	Incidence	192	Southern Sub-Saharan Africa	2	Female	27	Age-standardized	1048	COVID-19	3	Rate	2020	28731.8	31345.3	25933.8
6	Incidence	192	Southern Sub-Saharan Africa	3	Both	27	Age-standardized	1048	COVID-19	3	Rate	2020	28776.6	31397.7	25976
6	Incidence	174	Eastern Sub-Saharan Africa	1	Male	27	Age-standardized	1048	COVID-19	3	Rate	2020	27735.8	29185.3	26179.6
6	Incidence	174	Eastern Sub-Saharan Africa	2	Female	27	Age-standardized	1048	COVID-19	3	Rate	2020	27497.6	28931	25940.6
6	Incidence	174	Eastern Sub-Saharan Africa	3	Both	27	Age-standardized	1048	COVID-19	3	Rate	2020	27611.6	29046.1	26055.4
6	Incidence	167	Central Sub-Saharan Africa	1	Male	27	Age-standardized	1048	COVID-19	3	Rate	2020	46611.6	54344.8	30970.6
6	Incidence	167	Central Sub-Saharan Africa	2	Female	27	Age-standardized	1048	COVID-19	3	Rate	2020	46372.2	54079.9	30970.9
6	Incidence	167	Central Sub-Saharan Africa	3	Both	27	Age-standardized	1048	COVID-19	3	Rate	2020	46494.8	54215.8	30971
6	Incidence	5	East Asia	1	Male	27	Age-standardized	1048	COVID-19	3	Rate	2021	14.3954	17.8272	12.1078
6	Incidence	5	East Asia	2	Female	27	Age-standardized	1048	COVID-19	3	Rate	2021	14.6217	18.1013	12.2742
6	Incidence	5	East Asia	3	Both	27	Age-standardized	1048	COVID-19	3	Rate	2021	14.4321	17.8462	12.1298
6	Incidence	56	Eastern Europe	1	Male	27	Age-standardized	1048	COVID-19	3	Rate	2021	58591	64719.5	52213
6	Incidence	56	Eastern Europe	2	Female	27	Age-standardized	1048	COVID-19	3	Rate	2021	58756.5	64891.3	52403.8
6	Incidence	56	Eastern Europe	3	Both	27	Age-standardized	1048	COVID-19	3	Rate	2021	58681.1	64812.5	52343.5
6	Incidence	21	Oceania	1	Male	27	Age-standardized	1048	COVID-19	3	Rate	2021	33081	49294.5	17256.5
6	Incidence	21	Oceania	2	Female	27	Age-standardized	1048	COVID-19	3	Rate	2021	32838.2	48710	17204.1
6	Incidence	21	Oceania	3	Both	27	Age-standardized	1048	COVID-19	3	Rate	2021	32963.5	48996.7	17227.6
6	Incidence	70	Australasia	1	Male	27	Age-standardized	1048	COVID-19	3	Rate	2021	1101.48	1208.98	995
6	Incidence	70	Australasia	2	Female	27	Age-standardized	1048	COVID-19	3	Rate	2021	1104.03	1211.56	997.08
6	Incidence	70	Australasia	3	Both	27	Age-standardized	1048	COVID-19	3	Rate	2021	1102.76	1210.14	996.047
6	Incidence	42	Central Europe	1	Male	27	Age-standardized	1048	COVID-19	3	Rate	2021	43683.9	47462.8	39338.2
6	Incidence	42	Central Europe	2	Female	27	Age-standardized	1048	COVID-19	3	Rate	2021	43673.6	47408.2	39313.5
6	Incidence	42	Central Europe	3	Both	27	Age-standardized	1048	COVID-19	3	Rate	2021	43678.3	47435.3	39325.5
6	Incidence	9	Southeast Asia	1	Male	27	Age-standardized	1048	COVID-19	3	Rate	2021	31152	34002	28310.6
6	Incidence	9	Southeast Asia	2	Female	27	Age-standardized	1048	COVID-19	3	Rate	2021	30984.5	33868.5	28143.2
6	Incidence	9	Southeast Asia	3	Both	27	Age-standardized	1048	COVID-19	3	Rate	2021	31065.7	33925.7	28230.3
6	Incidence	65	High-income Asia Pacific	1	Male	27	Age-standardized	1048	COVID-19	3	Rate	2021	3539.5	4173.88	3245.99
6	Incidence	65	High-income Asia Pacific	2	Female	27	Age-standardized	1048	COVID-19	3	Rate	2021	3547.03	4172.67	3255.08
6	Incidence	65	High-income Asia Pacific	3	Both	27	Age-standardized	1048	COVID-19	3	Rate	2021	3543.21	4181.21	3250.39
6	Incidence	32	Central Asia	1	Male	27	Age-standardized	1048	COVID-19	3	Rate	2021	43680.5	54794.6	32682.7
6	Incidence	32	Central Asia	2	Female	27	Age-standardized	1048	COVID-19	3	Rate	2021	43752.2	54932.8	32753.2
6	Incidence	32	Central Asia	3	Both	27	Age-standardized	1048	COVID-19	3	Rate	2021	43721.6	54890.7	32721.7
6	Incidence	100	High-income North America	1	Male	27	Age-standardized	1048	COVID-19	3	Rate	2021	18272.2	19187.6	17369.7
6	Incidence	100	High-income North America	2	Female	27	Age-standardized	1048	COVID-19	3	Rate	2021	18285.8	19195.7	17390.5
6	Incidence	100	High-income North America	3	Both	27	Age-standardized	1048	COVID-19	3	Rate	2021	18279.2	19191.7	17380.3
6	Incidence	104	Caribbean	1	Male	27	Age-standardized	1048	COVID-19	3	Rate	2021	19710.6	28699.6	12790.4
6	Incidence	104	Caribbean	2	Female	27	Age-standardized	1048	COVID-19	3	Rate	2021	19778.1	29177.7	12725.7
6	Incidence	104	Caribbean	3	Both	27	Age-standardized	1048	COVID-19	3	Rate	2021	19743.1	28910.4	12753.2
6	Incidence	120	Andean Latin America	1	Male	27	Age-standardized	1048	COVID-19	3	Rate	2021	36567.3	44217.3	29492.8
6	Incidence	120	Andean Latin America	2	Female	27	Age-standardized	1048	COVID-19	3	Rate	2021	36652.1	44240.7	29569
6	Incidence	120	Andean Latin America	3	Both	27	Age-standardized	1048	COVID-19	3	Rate	2021	36607	44235.9	29528.5
6	Incidence	73	Western Europe	1	Male	27	Age-standardized	1048	COVID-19	3	Rate	2021	15334.6	16342.9	14551
6	Incidence	73	Western Europe	2	Female	27	Age-standardized	1048	COVID-19	3	Rate	2021	15388.9	16408.9	14594.6
6	Incidence	73	Western Europe	3	Both	27	Age-standardized	1048	COVID-19	3	Rate	2021	15361.7	16375.3	14572.7
6	Incidence	124	Central Latin America	1	Male	27	Age-standardized	1048	COVID-19	3	Rate	2021	31378.7	33654.5	28883.3
6	Incidence	124	Central Latin America	2	Female	27	Age-standardized	1048	COVID-19	3	Rate	2021	31434.6	33741.1	28914.4
6	Incidence	124	Central Latin America	3	Both	27	Age-standardized	1048	COVID-19	3	Rate	2021	31406.4	33698.1	28889
6	Incidence	134	Tropical Latin America	1	Male	27	Age-standardized	1048	COVID-19	3	Rate	2021	35985.6	39724.6	32552.2
6	Incidence	134	Tropical Latin America	2	Female	27	Age-standardized	1048	COVID-19	3	Rate	2021	35868.1	39647.1	32443.4
6	Incidence	134	Tropical Latin America	3	Both	27	Age-standardized	1048	COVID-19	3	Rate	2021	35921.6	39681.9	32493.4
6	Incidence	96	Southern Latin America	1	Male	27	Age-standardized	1048	COVID-19	3	Rate	2021	16042.2	21494.4	12954.2
6	Incidence	96	Southern Latin America	2	Female	27	Age-standardized	1048	COVID-19	3	Rate	2021	16062.1	21517.3	12967.1
6	Incidence	96	Southern Latin America	3	Both	27	Age-standardized	1048	COVID-19	3	Rate	2021	16051.8	21515.9	12960.5
6	Incidence	159	South Asia	1	Male	27	Age-standardized	1048	COVID-19	3	Rate	2021	41695.4	45904.7	37516.2
6	Incidence	159	South Asia	2	Female	27	Age-standardized	1048	COVID-19	3	Rate	2021	41793.5	45959.3	37575.4
6	Incidence	159	South Asia	3	Both	27	Age-standardized	1048	COVID-19	3	Rate	2021	41742.9	45919	37546
6	Incidence	138	North Africa and Middle East	1	Male	27	Age-standardized	1048	COVID-19	3	Rate	2021	33925.5	39286.7	27631.9
6	Incidence	138	North Africa and Middle East	2	Female	27	Age-standardized	1048	COVID-19	3	Rate	2021	34372.5	39819.7	28103.2
6	Incidence	138	North Africa and Middle East	3	Both	27	Age-standardized	1048	COVID-19	3	Rate	2021	34139.9	39516.3	27857.9
6	Incidence	199	Western Sub-Saharan Africa	1	Male	27	Age-standardized	1048	COVID-19	3	Rate	2021	35782.1	40192.4	31294.5
6	Incidence	199	Western Sub-Saharan Africa	2	Female	27	Age-standardized	1048	COVID-19	3	Rate	2021	35515.3	39622.7	31196.1
6	Incidence	199	Western Sub-Saharan Africa	3	Both	27	Age-standardized	1048	COVID-19	3	Rate	2021	35642.7	39893.9	31251.9
6	Incidence	192	Southern Sub-Saharan Africa	1	Male	27	Age-standardized	1048	COVID-19	3	Rate	2021	47475.4	51779.9	40060.2
6	Incidence	192	Southern Sub-Saharan Africa	2	Female	27	Age-standardized	1048	COVID-19	3	Rate	2021	47856.8	52250.2	40001.4
6	Incidence	192	Southern Sub-Saharan Africa	3	Both	27	Age-standardized	1048	COVID-19	3	Rate	2021	47661.1	52003.1	40023
6	Incidence	174	Eastern Sub-Saharan Africa	1	Male	27	Age-standardized	1048	COVID-19	3	Rate	2021	56633.4	60156.6	52625.6
6	Incidence	174	Eastern Sub-Saharan Africa	2	Female	27	Age-standardized	1048	COVID-19	3	Rate	2021	56609.6	60151.9	52566.3
6	Incidence	174	Eastern Sub-Saharan Africa	3	Both	27	Age-standardized	1048	COVID-19	3	Rate	2021	56618.8	60142	52587
6	Incidence	167	Central Sub-Saharan Africa	1	Male	27	Age-standardized	1048	COVID-19	3	Rate	2021	44021.2	53798.2	32984.8
6	Incidence	167	Central Sub-Saharan Africa	2	Female	27	Age-standardized	1048	COVID-19	3	Rate	2021	44386.1	54067.8	33303.5
6	Incidence	167	Central Sub-Saharan Africa	3	Both	27	Age-standardized	1048	COVID-19	3	Rate	2021	44202	53933.3	33151.7
