# Supplementary material for: Trends and cross-country disparity in the burden of COVID-19 between 2020 and 2021: a systematic analysis for the Global Burden of Disease Study 2021
Source: Research Square preprint supplement (doi:10.21203/rs.3.rs-5109929/v1), 2024-09-24
Supplement: Supplementary file 3 [file da1bd27deae5da6ab0b4bd33.xlsx]

## Sheet: The number
measure_id	measure_name	location_id	location_name	sex_id	sex_name	age_id	age_name	cause_id	cause_name	metric_id	metric_name	year	location_name	val	upper	lower
1	Deaths	5	East Asia	1	Male	22	All ages	1048	COVID-19	1	Number	2020	East Asia	17178.6	87644.9	3769.13
1	Deaths	9	Southeast Asia	1	Male	22	All ages	1048	COVID-19	1	Number	2020	Southeast Asia	75293.9	145747	29831.8
1	Deaths	21	Oceania	1	Male	22	All ages	1048	COVID-19	1	Number	2020	Oceania	757.153	1565.42	215.771
1	Deaths	32	Central Asia	1	Male	22	All ages	1048	COVID-19	1	Number	2020	Central Asia	50380.5	61787.8	36995.4
1	Deaths	42	Central Europe	1	Male	22	All ages	1048	COVID-19	1	Number	2020	Central Europe	92150.3	113212	70374.3
1	Deaths	56	Eastern Europe	1	Male	22	All ages	1048	COVID-19	1	Number	2020	Eastern Europe	109656	133985	87342
1	Deaths	65	High-income Asia Pacific	1	Male	22	All ages	1048	COVID-19	1	Number	2020	High-income Asia Pacific	2764.14	3364.25	2298.2
1	Deaths	70	Australasia	1	Male	22	All ages	1048	COVID-19	1	Number	2020	Australasia	567.139	593.905	540.209
1	Deaths	73	Western Europe	1	Male	22	All ages	1048	COVID-19	1	Number	2020	Western Europe	223545	231202	215478
1	Deaths	96	Southern Latin America	1	Male	22	All ages	1048	COVID-19	1	Number	2020	Southern Latin America	37331.5	38627.3	36071.9
1	Deaths	100	High-income North America	1	Male	22	All ages	1048	COVID-19	1	Number	2020	High-income North America	254635	263487	245884
1	Deaths	104	Caribbean	1	Male	22	All ages	1048	COVID-19	1	Number	2020	Caribbean	12987.5	20912	7193.2
1	Deaths	120	Andean Latin America	1	Male	22	All ages	1048	COVID-19	1	Number	2020	Andean Latin America	106043	123721	90645
1	Deaths	124	Central Latin America	1	Male	22	All ages	1048	COVID-19	1	Number	2020	Central Latin America	262460	306866	217889
1	Deaths	134	Tropical Latin America	1	Male	22	All ages	1048	COVID-19	1	Number	2020	Tropical Latin America	122358	135538	110541
1	Deaths	138	North Africa and Middle East	1	Male	22	All ages	1048	COVID-19	1	Number	2020	North Africa and Middle East	319666	357197	273933
1	Deaths	159	South Asia	1	Male	22	All ages	1048	COVID-19	1	Number	2020	South Asia	864248	920831	808921
1	Deaths	167	Central Sub-Saharan Africa	1	Male	22	All ages	1048	COVID-19	1	Number	2020	Central Sub-Saharan Africa	47319.1	52571.6	42585.5
1	Deaths	174	Eastern Sub-Saharan Africa	1	Male	22	All ages	1048	COVID-19	1	Number	2020	Eastern Sub-Saharan Africa	148076	160300	137666
1	Deaths	192	Southern Sub-Saharan Africa	1	Male	22	All ages	1048	COVID-19	1	Number	2020	Southern Sub-Saharan Africa	73515.1	74682.9	72278.9
1	Deaths	199	Western Sub-Saharan Africa	1	Male	22	All ages	1048	COVID-19	1	Number	2020	Western Sub-Saharan Africa	146320	159356	132622
1	Deaths	5	East Asia	2	Female	22	All ages	1048	COVID-19	1	Number	2020	East Asia	10344.4	52247.8	2216.24
1	Deaths	9	Southeast Asia	2	Female	22	All ages	1048	COVID-19	1	Number	2020	Southeast Asia	43105.8	81959.4	18663.2
1	Deaths	21	Oceania	2	Female	22	All ages	1048	COVID-19	1	Number	2020	Oceania	372.147	762.093	111.694
1	Deaths	32	Central Asia	2	Female	22	All ages	1048	COVID-19	1	Number	2020	Central Asia	36919.6	45153	27342.9
1	Deaths	42	Central Europe	2	Female	22	All ages	1048	COVID-19	1	Number	2020	Central Europe	70260.2	85114.3	55810.4
1	Deaths	56	Eastern Europe	2	Female	22	All ages	1048	COVID-19	1	Number	2020	Eastern Europe	108045	129384	89300.6
1	Deaths	65	High-income Asia Pacific	2	Female	22	All ages	1048	COVID-19	1	Number	2020	High-income Asia Pacific	2021.28	2497.51	1687.33
1	Deaths	70	Australasia	2	Female	22	All ages	1048	COVID-19	1	Number	2020	Australasia	409.935	428.804	388.692
1	Deaths	73	Western Europe	2	Female	22	All ages	1048	COVID-19	1	Number	2020	Western Europe	180157	185319	173976
1	Deaths	96	Southern Latin America	2	Female	22	All ages	1048	COVID-19	1	Number	2020	Southern Latin America	27324.7	28212.5	26492.9
1	Deaths	100	High-income North America	2	Female	22	All ages	1048	COVID-19	1	Number	2020	High-income North America	201565	208297	194932
1	Deaths	104	Caribbean	2	Female	22	All ages	1048	COVID-19	1	Number	2020	Caribbean	7120.05	11387.8	3891.4
1	Deaths	120	Andean Latin America	2	Female	22	All ages	1048	COVID-19	1	Number	2020	Andean Latin America	57804.4	69470.6	47428.4
1	Deaths	124	Central Latin America	2	Female	22	All ages	1048	COVID-19	1	Number	2020	Central Latin America	151093	178306	123001
1	Deaths	134	Tropical Latin America	2	Female	22	All ages	1048	COVID-19	1	Number	2020	Tropical Latin America	79580.4	87292.2	72039.4
1	Deaths	138	North Africa and Middle East	2	Female	22	All ages	1048	COVID-19	1	Number	2020	North Africa and Middle East	163162	181190	141953
1	Deaths	159	South Asia	2	Female	22	All ages	1048	COVID-19	1	Number	2020	South Asia	451716	480590	422051
1	Deaths	167	Central Sub-Saharan Africa	2	Female	22	All ages	1048	COVID-19	1	Number	2020	Central Sub-Saharan Africa	28577.7	31771.9	25705.6
1	Deaths	174	Eastern Sub-Saharan Africa	2	Female	22	All ages	1048	COVID-19	1	Number	2020	Eastern Sub-Saharan Africa	82175	89036.2	75974.7
1	Deaths	192	Southern Sub-Saharan Africa	2	Female	22	All ages	1048	COVID-19	1	Number	2020	Southern Sub-Saharan Africa	55158.9	55955.6	54316.7
1	Deaths	199	Western Sub-Saharan Africa	2	Female	22	All ages	1048	COVID-19	1	Number	2020	Western Sub-Saharan Africa	77638.4	84566.6	70400.9
1	Deaths	5	East Asia	3	Both	22	All ages	1048	COVID-19	1	Number	2020	East Asia	27522.9	139893	5985.23
1	Deaths	9	Southeast Asia	3	Both	22	All ages	1048	COVID-19	1	Number	2020	Southeast Asia	118400	227719	47604.7
1	Deaths	21	Oceania	3	Both	22	All ages	1048	COVID-19	1	Number	2020	Oceania	1129.3	2327.34	327.258
1	Deaths	32	Central Asia	3	Both	22	All ages	1048	COVID-19	1	Number	2020	Central Asia	87300	106717	64322.2
1	Deaths	42	Central Europe	3	Both	22	All ages	1048	COVID-19	1	Number	2020	Central Europe	162410	197765	127079
1	Deaths	56	Eastern Europe	3	Both	22	All ages	1048	COVID-19	1	Number	2020	Eastern Europe	217700	252344	188024
1	Deaths	65	High-income Asia Pacific	3	Both	22	All ages	1048	COVID-19	1	Number	2020	High-income Asia Pacific	4785.42	5777.85	4073.66
1	Deaths	70	Australasia	3	Both	22	All ages	1048	COVID-19	1	Number	2020	Australasia	977.074	1017.92	931.054
1	Deaths	73	Western Europe	3	Both	22	All ages	1048	COVID-19	1	Number	2020	Western Europe	403702	416266	390231
1	Deaths	96	Southern Latin America	3	Both	22	All ages	1048	COVID-19	1	Number	2020	Southern Latin America	64656.3	66679.8	62706.7
1	Deaths	100	High-income North America	3	Both	22	All ages	1048	COVID-19	1	Number	2020	High-income North America	456200	472018	440865
1	Deaths	104	Caribbean	3	Both	22	All ages	1048	COVID-19	1	Number	2020	Caribbean	20107.5	32342.5	11175.1
1	Deaths	120	Andean Latin America	3	Both	22	All ages	1048	COVID-19	1	Number	2020	Andean Latin America	163847	190298	141548
1	Deaths	124	Central Latin America	3	Both	22	All ages	1048	COVID-19	1	Number	2020	Central Latin America	413553	472864	356001
1	Deaths	134	Tropical Latin America	3	Both	22	All ages	1048	COVID-19	1	Number	2020	Tropical Latin America	201938	219463	187312
1	Deaths	138	North Africa and Middle East	3	Both	22	All ages	1048	COVID-19	1	Number	2020	North Africa and Middle East	482829	537748	415807
1	Deaths	159	South Asia	3	Both	22	All ages	1048	COVID-19	1	Number	2020	South Asia	1.31596e+06	1.40148e+06	1.23078e+06
1	Deaths	167	Central Sub-Saharan Africa	3	Both	22	All ages	1048	COVID-19	1	Number	2020	Central Sub-Saharan Africa	75896.8	84364.1	68291.1
1	Deaths	174	Eastern Sub-Saharan Africa	3	Both	22	All ages	1048	COVID-19	1	Number	2020	Eastern Sub-Saharan Africa	230251	249303	213611
1	Deaths	192	Southern Sub-Saharan Africa	3	Both	22	All ages	1048	COVID-19	1	Number	2020	Southern Sub-Saharan Africa	128674	130634	126596
1	Deaths	199	Western Sub-Saharan Africa	3	Both	22	All ages	1048	COVID-19	1	Number	2020	Western Sub-Saharan Africa	223959	243864	203038
2	DALYs (Disability-Adjusted Life Years)	5	East Asia	1	Male	22	All ages	1048	COVID-19	1	Number	2020	East Asia	403546	2.06254e+06	95504.5
2	DALYs (Disability-Adjusted Life Years)	9	Southeast Asia	1	Male	22	All ages	1048	COVID-19	1	Number	2020	Southeast Asia	2.26586e+06	4.29168e+06	985517
2	DALYs (Disability-Adjusted Life Years)	21	Oceania	1	Male	22	All ages	1048	COVID-19	1	Number	2020	Oceania	23669.2	48812.8	6531.65
2	DALYs (Disability-Adjusted Life Years)	32	Central Asia	1	Male	22	All ages	1048	COVID-19	1	Number	2020	Central Asia	1.40428e+06	1.72383e+06	1.03658e+06
2	DALYs (Disability-Adjusted Life Years)	42	Central Europe	1	Male	22	All ages	1048	COVID-19	1	Number	2020	Central Europe	1.9777e+06	2.43464e+06	1.50015e+06
2	DALYs (Disability-Adjusted Life Years)	56	Eastern Europe	1	Male	22	All ages	1048	COVID-19	1	Number	2020	Eastern Europe	2.65877e+06	3.2753e+06	2.1031e+06
2	DALYs (Disability-Adjusted Life Years)	65	High-income Asia Pacific	1	Male	22	All ages	1048	COVID-19	1	Number	2020	High-income Asia Pacific	48681.2	59460.5	39753.8
2	DALYs (Disability-Adjusted Life Years)	70	Australasia	1	Male	22	All ages	1048	COVID-19	1	Number	2020	Australasia	9569.49	10092.5	9053.47
2	DALYs (Disability-Adjusted Life Years)	73	Western Europe	1	Male	22	All ages	1048	COVID-19	1	Number	2020	Western Europe	4.16721e+06	4.32427e+06	4.00739e+06
2	DALYs (Disability-Adjusted Life Years)	96	Southern Latin America	1	Male	22	All ages	1048	COVID-19	1	Number	2020	Southern Latin America	839848	870813	811944
2	DALYs (Disability-Adjusted Life Years)	100	High-income North America	1	Male	22	All ages	1048	COVID-19	1	Number	2020	High-income North America	6.29198e+06	6.52945e+06	6.05644e+06
2	DALYs (Disability-Adjusted Life Years)	104	Caribbean	1	Male	22	All ages	1048	COVID-19	1	Number	2020	Caribbean	338564	546737	186166
2	DALYs (Disability-Adjusted Life Years)	120	Andean Latin America	1	Male	22	All ages	1048	COVID-19	1	Number	2020	Andean Latin America	2.61648e+06	3.05979e+06	2.22029e+06
2	DALYs (Disability-Adjusted Life Years)	124	Central Latin America	1	Male	22	All ages	1048	COVID-19	1	Number	2020	Central Latin America	6.94985e+06	8.24498e+06	5.74878e+06
2	DALYs (Disability-Adjusted Life Years)	134	Tropical Latin America	1	Male	22	All ages	1048	COVID-19	1	Number	2020	Tropical Latin America	3.15101e+06	3.5257e+06	2.83558e+06
2	DALYs (Disability-Adjusted Life Years)	138	North Africa and Middle East	1	Male	22	All ages	1048	COVID-19	1	Number	2020	North Africa and Middle East	8.76728e+06	9.88803e+06	7.56292e+06
2	DALYs (Disability-Adjusted Life Years)	159	South Asia	1	Male	22	All ages	1048	COVID-19	1	Number	2020	South Asia	2.37811e+07	2.54659e+07	2.21755e+07
2	DALYs (Disability-Adjusted Life Years)	167	Central Sub-Saharan Africa	1	Male	22	All ages	1048	COVID-19	1	Number	2020	Central Sub-Saharan Africa	1.5943e+06	1.76969e+06	1.42683e+06
2	DALYs (Disability-Adjusted Life Years)	174	Eastern Sub-Saharan Africa	1	Male	22	All ages	1048	COVID-19	1	Number	2020	Eastern Sub-Saharan Africa	4.64787e+06	5.03204e+06	4.31085e+06
2	DALYs (Disability-Adjusted Life Years)	192	Southern Sub-Saharan Africa	1	Male	22	All ages	1048	COVID-19	1	Number	2020	Southern Sub-Saharan Africa	2.11433e+06	2.15599e+06	2.07276e+06
2	DALYs (Disability-Adjusted Life Years)	199	Western Sub-Saharan Africa	1	Male	22	All ages	1048	COVID-19	1	Number	2020	Western Sub-Saharan Africa	4.48222e+06	4.94072e+06	4.05854e+06
2	DALYs (Disability-Adjusted Life Years)	5	East Asia	2	Female	22	All ages	1048	COVID-19	1	Number	2020	East Asia	217725	1.07978e+06	52354.6
2	DALYs (Disability-Adjusted Life Years)	9	Southeast Asia	2	Female	22	All ages	1048	COVID-19	1	Number	2020	Southeast Asia	1.27197e+06	2.28276e+06	625981
2	DALYs (Disability-Adjusted Life Years)	21	Oceania	2	Female	22	All ages	1048	COVID-19	1	Number	2020	Oceania	12081.5	24791.2	3529.64
2	DALYs (Disability-Adjusted Life Years)	32	Central Asia	2	Female	22	All ages	1048	COVID-19	1	Number	2020	Central Asia	901178	1.09444e+06	688897
2	DALYs (Disability-Adjusted Life Years)	42	Central Europe	2	Female	22	All ages	1048	COVID-19	1	Number	2020	Central Europe	1.27569e+06	1.54955e+06	1.01567e+06
2	DALYs (Disability-Adjusted Life Years)	56	Eastern Europe	2	Female	22	All ages	1048	COVID-19	1	Number	2020	Eastern Europe	2.17842e+06	2.62347e+06	1.78542e+06
2	DALYs (Disability-Adjusted Life Years)	65	High-income Asia Pacific	2	Female	22	All ages	1048	COVID-19	1	Number	2020	High-income Asia Pacific	33791.7	41423.2	27945.5
2	DALYs (Disability-Adjusted Life Years)	70	Australasia	2	Female	22	All ages	1048	COVID-19	1	Number	2020	Australasia	6520.01	6988.75	6136.39
2	DALYs (Disability-Adjusted Life Years)	73	Western Europe	2	Female	22	All ages	1048	COVID-19	1	Number	2020	Western Europe	2.7911e+06	2.9188e+06	2.66307e+06
2	DALYs (Disability-Adjusted Life Years)	96	Southern Latin America	2	Female	22	All ages	1048	COVID-19	1	Number	2020	Southern Latin America	523696	549060	502906
2	DALYs (Disability-Adjusted Life Years)	100	High-income North America	2	Female	22	All ages	1048	COVID-19	1	Number	2020	High-income North America	3.86603e+06	4.02691e+06	3.70725e+06
2	DALYs (Disability-Adjusted Life Years)	104	Caribbean	2	Female	22	All ages	1048	COVID-19	1	Number	2020	Caribbean	183519	293536	107784
2	DALYs (Disability-Adjusted Life Years)	120	Andean Latin America	2	Female	22	All ages	1048	COVID-19	1	Number	2020	Andean Latin America	1.39445e+06	1.69015e+06	1.14297e+06
2	DALYs (Disability-Adjusted Life Years)	124	Central Latin America	2	Female	22	All ages	1048	COVID-19	1	Number	2020	Central Latin America	3.83385e+06	4.54257e+06	3.12349e+06
2	DALYs (Disability-Adjusted Life Years)	134	Tropical Latin America	2	Female	22	All ages	1048	COVID-19	1	Number	2020	Tropical Latin America	1.96705e+06	2.22015e+06	1.75568e+06
2	DALYs (Disability-Adjusted Life Years)	138	North Africa and Middle East	2	Female	22	All ages	1048	COVID-19	1	Number	2020	North Africa and Middle East	4.44149e+06	5.12381e+06	3.8244e+06
2	DALYs (Disability-Adjusted Life Years)	159	South Asia	2	Female	22	All ages	1048	COVID-19	1	Number	2020	South Asia	1.24404e+07	1.4141e+07	1.13663e+07
2	DALYs (Disability-Adjusted Life Years)	167	Central Sub-Saharan Africa	2	Female	22	All ages	1048	COVID-19	1	Number	2020	Central Sub-Saharan Africa	936688	1.09229e+06	820187
2	DALYs (Disability-Adjusted Life Years)	174	Eastern Sub-Saharan Africa	2	Female	22	All ages	1048	COVID-19	1	Number	2020	Eastern Sub-Saharan Africa	2.58061e+06	2.86945e+06	2.34715e+06
2	DALYs (Disability-Adjusted Life Years)	192	Southern Sub-Saharan Africa	2	Female	22	All ages	1048	COVID-19	1	Number	2020	Southern Sub-Saharan Africa	1.3748e+06	1.42703e+06	1.33561e+06
2	DALYs (Disability-Adjusted Life Years)	199	Western Sub-Saharan Africa	2	Female	22	All ages	1048	COVID-19	1	Number	2020	Western Sub-Saharan Africa	2.58757e+06	3.0824e+06	2.27399e+06
2	DALYs (Disability-Adjusted Life Years)	5	East Asia	3	Both	22	All ages	1048	COVID-19	1	Number	2020	East Asia	621270	3.14232e+06	147728
2	DALYs (Disability-Adjusted Life Years)	9	Southeast Asia	3	Both	22	All ages	1048	COVID-19	1	Number	2020	Southeast Asia	3.53783e+06	6.58558e+06	1.5643e+06
2	DALYs (Disability-Adjusted Life Years)	21	Oceania	3	Both	22	All ages	1048	COVID-19	1	Number	2020	Oceania	35750.6	73587.6	10020.8
2	DALYs (Disability-Adjusted Life Years)	32	Central Asia	3	Both	22	All ages	1048	COVID-19	1	Number	2020	Central Asia	2.30546e+06	2.80662e+06	1.72887e+06
2	DALYs (Disability-Adjusted Life Years)	42	Central Europe	3	Both	22	All ages	1048	COVID-19	1	Number	2020	Central Europe	3.2534e+06	3.98282e+06	2.56216e+06
2	DALYs (Disability-Adjusted Life Years)	56	Eastern Europe	3	Both	22	All ages	1048	COVID-19	1	Number	2020	Eastern Europe	4.83719e+06	5.62276e+06	4.12498e+06
2	DALYs (Disability-Adjusted Life Years)	65	High-income Asia Pacific	3	Both	22	All ages	1048	COVID-19	1	Number	2020	High-income Asia Pacific	82472.8	100957	69327.3
2	DALYs (Disability-Adjusted Life Years)	70	Australasia	3	Both	22	All ages	1048	COVID-19	1	Number	2020	Australasia	16089.5	16953.5	15260.9
2	DALYs (Disability-Adjusted Life Years)	73	Western Europe	3	Both	22	All ages	1048	COVID-19	1	Number	2020	Western Europe	6.95832e+06	7.21323e+06	6.69521e+06
2	DALYs (Disability-Adjusted Life Years)	96	Southern Latin America	3	Both	22	All ages	1048	COVID-19	1	Number	2020	Southern Latin America	1.36354e+06	1.41561e+06	1.31804e+06
2	DALYs (Disability-Adjusted Life Years)	100	High-income North America	3	Both	22	All ages	1048	COVID-19	1	Number	2020	High-income North America	1.0158e+07	1.0565e+07	9.77375e+06
2	DALYs (Disability-Adjusted Life Years)	104	Caribbean	3	Both	22	All ages	1048	COVID-19	1	Number	2020	Caribbean	522083	834668	296610
2	DALYs (Disability-Adjusted Life Years)	120	Andean Latin America	3	Both	22	All ages	1048	COVID-19	1	Number	2020	Andean Latin America	4.01094e+06	4.67591e+06	3.45812e+06
2	DALYs (Disability-Adjusted Life Years)	124	Central Latin America	3	Both	22	All ages	1048	COVID-19	1	Number	2020	Central Latin America	1.07837e+07	1.23769e+07	9.20104e+06
2	DALYs (Disability-Adjusted Life Years)	134	Tropical Latin America	3	Both	22	All ages	1048	COVID-19	1	Number	2020	Tropical Latin America	5.11806e+06	5.61678e+06	4.68349e+06
2	DALYs (Disability-Adjusted Life Years)	138	North Africa and Middle East	3	Both	22	All ages	1048	COVID-19	1	Number	2020	North Africa and Middle East	1.32088e+07	1.49308e+07	1.14414e+07
2	DALYs (Disability-Adjusted Life Years)	159	South Asia	3	Both	22	All ages	1048	COVID-19	1	Number	2020	South Asia	3.62215e+07	3.94979e+07	3.35173e+07
2	DALYs (Disability-Adjusted Life Years)	167	Central Sub-Saharan Africa	3	Both	22	All ages	1048	COVID-19	1	Number	2020	Central Sub-Saharan Africa	2.53099e+06	2.83955e+06	2.25604e+06
2	DALYs (Disability-Adjusted Life Years)	174	Eastern Sub-Saharan Africa	3	Both	22	All ages	1048	COVID-19	1	Number	2020	Eastern Sub-Saharan Africa	7.22848e+06	7.86505e+06	6.6594e+06
2	DALYs (Disability-Adjusted Life Years)	192	Southern Sub-Saharan Africa	3	Both	22	All ages	1048	COVID-19	1	Number	2020	Southern Sub-Saharan Africa	3.48913e+06	3.5776e+06	3.4111e+06
2	DALYs (Disability-Adjusted Life Years)	199	Western Sub-Saharan Africa	3	Both	22	All ages	1048	COVID-19	1	Number	2020	Western Sub-Saharan Africa	7.06978e+06	7.964e+06	6.37406e+06
6	Incidence	5	East Asia	1	Male	22	All ages	1048	COVID-19	1	Number	2020	East Asia	1.25712e+06	1.45536e+06	1.09599e+06
6	Incidence	9	Southeast Asia	1	Male	22	All ages	1048	COVID-19	1	Number	2020	Southeast Asia	3.19355e+07	3.47034e+07	2.90688e+07
6	Incidence	21	Oceania	1	Male	22	All ages	1048	COVID-19	1	Number	2020	Oceania	91579.5	158501	55417
6	Incidence	32	Central Asia	1	Male	22	All ages	1048	COVID-19	1	Number	2020	Central Asia	1.45583e+07	1.7459e+07	1.05054e+07
6	Incidence	42	Central Europe	1	Male	22	All ages	1048	COVID-19	1	Number	2020	Central Europe	1.64678e+07	1.79261e+07	1.49104e+07
6	Incidence	56	Eastern Europe	1	Male	22	All ages	1048	COVID-19	1	Number	2020	Eastern Europe	3.28736e+07	3.65588e+07	2.90678e+07
6	Incidence	65	High-income Asia Pacific	1	Male	22	All ages	1048	COVID-19	1	Number	2020	High-income Asia Pacific	1.11211e+06	1.18521e+06	1.04177e+06
6	Incidence	70	Australasia	1	Male	22	All ages	1048	COVID-19	1	Number	2020	Australasia	41074.7	48430.3	35220.2
6	Incidence	73	Western Europe	1	Male	22	All ages	1048	COVID-19	1	Number	2020	Western Europe	2.35783e+07	2.58643e+07	2.2035e+07
6	Incidence	96	Southern Latin America	1	Male	22	All ages	1048	COVID-19	1	Number	2020	Southern Latin America	3.49341e+06	4.83089e+06	2.67728e+06
6	Incidence	100	High-income North America	1	Male	22	All ages	1048	COVID-19	1	Number	2020	High-income North America	2.87508e+07	2.99967e+07	2.75993e+07
6	Incidence	104	Caribbean	1	Male	22	All ages	1048	COVID-19	1	Number	2020	Caribbean	2.29427e+06	3.17108e+06	1.35647e+06
6	Incidence	120	Andean Latin America	1	Male	22	All ages	1048	COVID-19	1	Number	2020	Andean Latin America	1.40714e+07	1.64494e+07	1.17267e+07
6	Incidence	124	Central Latin America	1	Male	22	All ages	1048	COVID-19	1	Number	2020	Central Latin America	4.06376e+07	4.28705e+07	3.82892e+07
6	Incidence	134	Tropical Latin America	1	Male	22	All ages	1048	COVID-19	1	Number	2020	Tropical Latin America	3.23653e+07	3.50358e+07	2.96322e+07
6	Incidence	138	North Africa and Middle East	1	Male	22	All ages	1048	COVID-19	1	Number	2020	North Africa and Middle East	1.00592e+08	1.16334e+08	7.935e+07
6	Incidence	159	South Asia	1	Male	22	All ages	1048	COVID-19	1	Number	2020	South Asia	2.85651e+08	3.14831e+08	2.61183e+08
6	Incidence	167	Central Sub-Saharan Africa	1	Male	22	All ages	1048	COVID-19	1	Number	2020	Central Sub-Saharan Africa	2.96896e+07	3.46221e+07	1.97214e+07
6	Incidence	174	Eastern Sub-Saharan Africa	1	Male	22	All ages	1048	COVID-19	1	Number	2020	Eastern Sub-Saharan Africa	5.45482e+07	5.74626e+07	5.14308e+07
6	Incidence	192	Southern Sub-Saharan Africa	1	Male	22	All ages	1048	COVID-19	1	Number	2020	Southern Sub-Saharan Africa	1.12319e+07	1.22567e+07	1.01207e+07
6	Incidence	199	Western Sub-Saharan Africa	1	Male	22	All ages	1048	COVID-19	1	Number	2020	Western Sub-Saharan Africa	8.804e+07	9.37508e+07	8.24365e+07
6	Incidence	5	East Asia	2	Female	22	All ages	1048	COVID-19	1	Number	2020	East Asia	1.17597e+06	1.36244e+06	1.0249e+06
6	Incidence	9	Southeast Asia	2	Female	22	All ages	1048	COVID-19	1	Number	2020	Southeast Asia	3.10383e+07	3.37226e+07	2.82371e+07
6	Incidence	21	Oceania	2	Female	22	All ages	1048	COVID-19	1	Number	2020	Oceania	85473.8	147390	51809.9
6	Incidence	32	Central Asia	2	Female	22	All ages	1048	COVID-19	1	Number	2020	Central Asia	1.48572e+07	1.78276e+07	1.0741e+07
6	Incidence	42	Central Europe	2	Female	22	All ages	1048	COVID-19	1	Number	2020	Central Europe	1.71759e+07	1.86972e+07	1.55447e+07
6	Incidence	56	Eastern Europe	2	Female	22	All ages	1048	COVID-19	1	Number	2020	Eastern Europe	3.7894e+07	4.21638e+07	3.34907e+07
6	Incidence	65	High-income Asia Pacific	2	Female	22	All ages	1048	COVID-19	1	Number	2020	High-income Asia Pacific	1.14583e+06	1.21851e+06	1.07453e+06
6	Incidence	70	Australasia	2	Female	22	All ages	1048	COVID-19	1	Number	2020	Australasia	41993	49516.6	35997.8
6	Incidence	73	Western Europe	2	Female	22	All ages	1048	COVID-19	1	Number	2020	Western Europe	2.42277e+07	2.66271e+07	2.26069e+07
6	Incidence	96	Southern Latin America	2	Female	22	All ages	1048	COVID-19	1	Number	2020	Southern Latin America	3.60789e+06	5.00486e+06	2.76135e+06
6	Incidence	100	High-income North America	2	Female	22	All ages	1048	COVID-19	1	Number	2020	High-income North America	2.9413e+07	3.06732e+07	2.82455e+07
6	Incidence	104	Caribbean	2	Female	22	All ages	1048	COVID-19	1	Number	2020	Caribbean	2.33828e+06	3.23248e+06	1.3881e+06
6	Incidence	120	Andean Latin America	2	Female	22	All ages	1048	COVID-19	1	Number	2020	Andean Latin America	1.4043e+07	1.64238e+07	1.17217e+07
6	Incidence	124	Central Latin America	2	Female	22	All ages	1048	COVID-19	1	Number	2020	Central Latin America	4.26649e+07	4.5022e+07	4.02203e+07
6	Incidence	134	Tropical Latin America	2	Female	22	All ages	1048	COVID-19	1	Number	2020	Tropical Latin America	3.39718e+07	3.68142e+07	3.10978e+07
6	Incidence	138	North Africa and Middle East	2	Female	22	All ages	1048	COVID-19	1	Number	2020	North Africa and Middle East	9.39185e+07	1.08842e+08	7.41957e+07
6	Incidence	159	South Asia	2	Female	22	All ages	1048	COVID-19	1	Number	2020	South Asia	2.73693e+08	3.02043e+08	2.49926e+08
6	Incidence	167	Central Sub-Saharan Africa	2	Female	22	All ages	1048	COVID-19	1	Number	2020	Central Sub-Saharan Africa	2.97074e+07	3.46558e+07	1.98685e+07
6	Incidence	174	Eastern Sub-Saharan Africa	2	Female	22	All ages	1048	COVID-19	1	Number	2020	Eastern Sub-Saharan Africa	5.55459e+07	5.84751e+07	5.23404e+07
6	Incidence	192	Southern Sub-Saharan Africa	2	Female	22	All ages	1048	COVID-19	1	Number	2020	Southern Sub-Saharan Africa	1.17801e+07	1.28551e+07	1.06256e+07
6	Incidence	199	Western Sub-Saharan Africa	2	Female	22	All ages	1048	COVID-19	1	Number	2020	Western Sub-Saharan Africa	9.39241e+07	9.98053e+07	8.81334e+07
6	Incidence	5	East Asia	3	Both	22	All ages	1048	COVID-19	1	Number	2020	East Asia	2.43308e+06	2.81705e+06	2.1209e+06
6	Incidence	9	Southeast Asia	3	Both	22	All ages	1048	COVID-19	1	Number	2020	Southeast Asia	6.29738e+07	6.84248e+07	5.732e+07
6	Incidence	21	Oceania	3	Both	22	All ages	1048	COVID-19	1	Number	2020	Oceania	177053	305925	107227
6	Incidence	32	Central Asia	3	Both	22	All ages	1048	COVID-19	1	Number	2020	Central Asia	2.94155e+07	3.52708e+07	2.12565e+07
6	Incidence	42	Central Europe	3	Both	22	All ages	1048	COVID-19	1	Number	2020	Central Europe	3.36437e+07	3.66271e+07	3.04605e+07
6	Incidence	56	Eastern Europe	3	Both	22	All ages	1048	COVID-19	1	Number	2020	Eastern Europe	7.07676e+07	7.87226e+07	6.25931e+07
6	Incidence	65	High-income Asia Pacific	3	Both	22	All ages	1048	COVID-19	1	Number	2020	High-income Asia Pacific	2.25794e+06	2.40367e+06	2.11535e+06
6	Incidence	70	Australasia	3	Both	22	All ages	1048	COVID-19	1	Number	2020	Australasia	83067.8	97945	71218
6	Incidence	73	Western Europe	3	Both	22	All ages	1048	COVID-19	1	Number	2020	Western Europe	4.78061e+07	5.25014e+07	4.46419e+07
6	Incidence	96	Southern Latin America	3	Both	22	All ages	1048	COVID-19	1	Number	2020	Southern Latin America	7.10129e+06	9.83575e+06	5.43862e+06
6	Incidence	100	High-income North America	3	Both	22	All ages	1048	COVID-19	1	Number	2020	High-income North America	5.81638e+07	6.067e+07	5.58469e+07
6	Incidence	104	Caribbean	3	Both	22	All ages	1048	COVID-19	1	Number	2020	Caribbean	4.63254e+06	6.40648e+06	2.7446e+06
6	Incidence	120	Andean Latin America	3	Both	22	All ages	1048	COVID-19	1	Number	2020	Andean Latin America	2.81144e+07	3.28733e+07	2.34513e+07
6	Incidence	124	Central Latin America	3	Both	22	All ages	1048	COVID-19	1	Number	2020	Central Latin America	8.33025e+07	8.78765e+07	7.85229e+07
6	Incidence	134	Tropical Latin America	3	Both	22	All ages	1048	COVID-19	1	Number	2020	Tropical Latin America	6.63371e+07	7.18476e+07	6.075e+07
6	Incidence	138	North Africa and Middle East	3	Both	22	All ages	1048	COVID-19	1	Number	2020	North Africa and Middle East	1.9451e+08	2.2516e+08	1.53488e+08
6	Incidence	159	South Asia	3	Both	22	All ages	1048	COVID-19	1	Number	2020	South Asia	5.59344e+08	6.16892e+08	5.10888e+08
6	Incidence	167	Central Sub-Saharan Africa	3	Both	22	All ages	1048	COVID-19	1	Number	2020	Central Sub-Saharan Africa	5.9397e+07	6.9278e+07	3.95639e+07
6	Incidence	174	Eastern Sub-Saharan Africa	3	Both	22	All ages	1048	COVID-19	1	Number	2020	Eastern Sub-Saharan Africa	1.10094e+08	1.15908e+08	1.03755e+08
6	Incidence	192	Southern Sub-Saharan Africa	3	Both	22	All ages	1048	COVID-19	1	Number	2020	Southern Sub-Saharan Africa	2.3012e+07	2.51111e+07	2.07659e+07
6	Incidence	199	Western Sub-Saharan Africa	3	Both	22	All ages	1048	COVID-19	1	Number	2020	Western Sub-Saharan Africa	1.81964e+08	1.93566e+08	1.70595e+08
1	Deaths	5	East Asia	1	Male	22	All ages	1048	COVID-19	1	Number	2021	East Asia	1880.02	6419.19	437.25
1	Deaths	9	Southeast Asia	1	Male	22	All ages	1048	COVID-19	1	Number	2021	Southeast Asia	371700	583843	261772
1	Deaths	21	Oceania	1	Male	22	All ages	1048	COVID-19	1	Number	2021	Oceania	7354.32	14291.5	1994.36
1	Deaths	32	Central Asia	1	Male	22	All ages	1048	COVID-19	1	Number	2021	Central Asia	65970.6	79462.7	49186.2
1	Deaths	42	Central Europe	1	Male	22	All ages	1048	COVID-19	1	Number	2021	Central Europe	170069	206060	132295
1	Deaths	56	Eastern Europe	1	Male	22	All ages	1048	COVID-19	1	Number	2021	Eastern Europe	318762	384884	258990
1	Deaths	65	High-income Asia Pacific	1	Male	22	All ages	1048	COVID-19	1	Number	2021	High-income Asia Pacific	15888.7	17798.9	14238.9
1	Deaths	70	Australasia	1	Male	22	All ages	1048	COVID-19	1	Number	2021	Australasia	1978	2315.58	1605.87
1	Deaths	73	Western Europe	1	Male	22	All ages	1048	COVID-19	1	Number	2021	Western Europe	242373	249878	235231
1	Deaths	96	Southern Latin America	1	Male	22	All ages	1048	COVID-19	1	Number	2021	Southern Latin America	61007.5	61789.8	60196.4
1	Deaths	100	High-income North America	1	Male	22	All ages	1048	COVID-19	1	Number	2021	High-income North America	286932	293118	281405
1	Deaths	104	Caribbean	1	Male	22	All ages	1048	COVID-19	1	Number	2021	Caribbean	53405.8	71350.7	39794.6
1	Deaths	120	Andean Latin America	1	Male	22	All ages	1048	COVID-19	1	Number	2021	Andean Latin America	115731	121086	109428
1	Deaths	124	Central Latin America	1	Male	22	All ages	1048	COVID-19	1	Number	2021	Central Latin America	297745	356222	242212
1	Deaths	134	Tropical Latin America	1	Male	22	All ages	1048	COVID-19	1	Number	2021	Tropical Latin America	258250	280882	235190
1	Deaths	138	North Africa and Middle East	1	Male	22	All ages	1048	COVID-19	1	Number	2021	North Africa and Middle East	468097	518815	411126
1	Deaths	159	South Asia	1	Male	22	All ages	1048	COVID-19	1	Number	2021	South Asia	1.34331e+06	1.4057e+06	1.29337e+06
1	Deaths	167	Central Sub-Saharan Africa	1	Male	22	All ages	1048	COVID-19	1	Number	2021	Central Sub-Saharan Africa	77771.6	91725	67516.1
1	Deaths	174	Eastern Sub-Saharan Africa	1	Male	22	All ages	1048	COVID-19	1	Number	2021	Eastern Sub-Saharan Africa	304357	328067	273920
1	Deaths	192	Southern Sub-Saharan Africa	1	Male	22	All ages	1048	COVID-19	1	Number	2021	Southern Sub-Saharan Africa	125539	131136	118202
1	Deaths	199	Western Sub-Saharan Africa	1	Male	22	All ages	1048	COVID-19	1	Number	2021	Western Sub-Saharan Africa	216104	233390	194964
1	Deaths	5	East Asia	2	Female	22	All ages	1048	COVID-19	1	Number	2021	East Asia	1151.85	3940.9	253.783
1	Deaths	9	Southeast Asia	2	Female	22	All ages	1048	COVID-19	1	Number	2021	Southeast Asia	220042	344638	155820
1	Deaths	21	Oceania	2	Female	22	All ages	1048	COVID-19	1	Number	2021	Oceania	3411.13	6607.72	979.917
1	Deaths	32	Central Asia	2	Female	22	All ages	1048	COVID-19	1	Number	2021	Central Asia	49007.3	58802.8	37209.7
1	Deaths	42	Central Europe	2	Female	22	All ages	1048	COVID-19	1	Number	2021	Central Europe	136958	165001	106247
1	Deaths	56	Eastern Europe	2	Female	22	All ages	1048	COVID-19	1	Number	2021	Eastern Europe	356219	420296	301006
1	Deaths	65	High-income Asia Pacific	2	Female	22	All ages	1048	COVID-19	1	Number	2021	High-income Asia Pacific	10342	11502.7	9233.99
1	Deaths	70	Australasia	2	Female	22	All ages	1048	COVID-19	1	Number	2021	Australasia	1466.39	1717.1	1190.21
1	Deaths	73	Western Europe	2	Female	22	All ages	1048	COVID-19	1	Number	2021	Western Europe	185198	190213	180355
1	Deaths	96	Southern Latin America	2	Female	22	All ages	1048	COVID-19	1	Number	2021	Southern Latin America	46792.9	47306.5	46332.7
1	Deaths	100	High-income North America	2	Female	22	All ages	1048	COVID-19	1	Number	2021	High-income North America	222200	226974	217948
1	Deaths	104	Caribbean	2	Female	22	All ages	1048	COVID-19	1	Number	2021	Caribbean	33122.3	43697.8	25013.9
1	Deaths	120	Andean Latin America	2	Female	22	All ages	1048	COVID-19	1	Number	2021	Andean Latin America	67980.6	71122.9	64286.6
1	Deaths	124	Central Latin America	2	Female	22	All ages	1048	COVID-19	1	Number	2021	Central Latin America	191250	231414	156332
1	Deaths	134	Tropical Latin America	2	Female	22	All ages	1048	COVID-19	1	Number	2021	Tropical Latin America	179560	197981	162717
1	Deaths	138	North Africa and Middle East	2	Female	22	All ages	1048	COVID-19	1	Number	2021	North Africa and Middle East	229960	255040	202218
1	Deaths	159	South Asia	2	Female	22	All ages	1048	COVID-19	1	Number	2021	South Asia	718221	750931	691903
1	Deaths	167	Central Sub-Saharan Africa	2	Female	22	All ages	1048	COVID-19	1	Number	2021	Central Sub-Saharan Africa	47098.8	55518.6	40902.1
1	Deaths	174	Eastern Sub-Saharan Africa	2	Female	22	All ages	1048	COVID-19	1	Number	2021	Eastern Sub-Saharan Africa	173188	187285	155052
1	Deaths	192	Southern Sub-Saharan Africa	2	Female	22	All ages	1048	COVID-19	1	Number	2021	Southern Sub-Saharan Africa	92215.8	96088.3	87150.9
1	Deaths	199	Western Sub-Saharan Africa	2	Female	22	All ages	1048	COVID-19	1	Number	2021	Western Sub-Saharan Africa	117939	127270	106534
1	Deaths	5	East Asia	3	Both	22	All ages	1048	COVID-19	1	Number	2021	East Asia	3031.86	10397.3	692.913
1	Deaths	9	Southeast Asia	3	Both	22	All ages	1048	COVID-19	1	Number	2021	Southeast Asia	591742	928413	417700
1	Deaths	21	Oceania	3	Both	22	All ages	1048	COVID-19	1	Number	2021	Oceania	10765.4	20899.2	2972.7
1	Deaths	32	Central Asia	3	Both	22	All ages	1048	COVID-19	1	Number	2021	Central Asia	114978	138034	86202.3
1	Deaths	42	Central Europe	3	Both	22	All ages	1048	COVID-19	1	Number	2021	Central Europe	307028	370283	240920
1	Deaths	56	Eastern Europe	3	Both	22	All ages	1048	COVID-19	1	Number	2021	Eastern Europe	674981	762300	588262
1	Deaths	65	High-income Asia Pacific	3	Both	22	All ages	1048	COVID-19	1	Number	2021	High-income Asia Pacific	26230.7	28997.6	23845.5
1	Deaths	70	Australasia	3	Both	22	All ages	1048	COVID-19	1	Number	2021	Australasia	3444.39	4032.79	2795.93
1	Deaths	73	Western Europe	3	Both	22	All ages	1048	COVID-19	1	Number	2021	Western Europe	427572	439301	416617
1	Deaths	96	Southern Latin America	3	Both	22	All ages	1048	COVID-19	1	Number	2021	Southern Latin America	107800	108895	106701
1	Deaths	100	High-income North America	3	Both	22	All ages	1048	COVID-19	1	Number	2021	High-income North America	509133	520092	499381
1	Deaths	104	Caribbean	3	Both	22	All ages	1048	COVID-19	1	Number	2021	Caribbean	86528.1	115143	64852.3
1	Deaths	120	Andean Latin America	3	Both	22	All ages	1048	COVID-19	1	Number	2021	Andean Latin America	183711	192201	173715
1	Deaths	124	Central Latin America	3	Both	22	All ages	1048	COVID-19	1	Number	2021	Central Latin America	488994	570060	418545
1	Deaths	134	Tropical Latin America	3	Both	22	All ages	1048	COVID-19	1	Number	2021	Tropical Latin America	437810	466380	409574
1	Deaths	138	North Africa and Middle East	3	Both	22	All ages	1048	COVID-19	1	Number	2021	North Africa and Middle East	698057	773666	613337
1	Deaths	159	South Asia	3	Both	22	All ages	1048	COVID-19	1	Number	2021	South Asia	2.06153e+06	2.15657e+06	1.98588e+06
1	Deaths	167	Central Sub-Saharan Africa	3	Both	22	All ages	1048	COVID-19	1	Number	2021	Central Sub-Saharan Africa	124870	147244	108418
1	Deaths	174	Eastern Sub-Saharan Africa	3	Both	22	All ages	1048	COVID-19	1	Number	2021	Eastern Sub-Saharan Africa	477545	514927	429049
1	Deaths	192	Southern Sub-Saharan Africa	3	Both	22	All ages	1048	COVID-19	1	Number	2021	Southern Sub-Saharan Africa	217754	227210	205356
1	Deaths	199	Western Sub-Saharan Africa	3	Both	22	All ages	1048	COVID-19	1	Number	2021	Western Sub-Saharan Africa	334042	360357	301457
2	DALYs (Disability-Adjusted Life Years)	5	East Asia	1	Male	22	All ages	1048	COVID-19	1	Number	2021	East Asia	31335.1	103767	7614.76
2	DALYs (Disability-Adjusted Life Years)	9	Southeast Asia	1	Male	22	All ages	1048	COVID-19	1	Number	2021	Southeast Asia	1.0824e+07	1.67191e+07	7.62027e+06
2	DALYs (Disability-Adjusted Life Years)	21	Oceania	1	Male	22	All ages	1048	COVID-19	1	Number	2021	Oceania	235481	454402	82386.2
2	DALYs (Disability-Adjusted Life Years)	32	Central Asia	1	Male	22	All ages	1048	COVID-19	1	Number	2021	Central Asia	1.93292e+06	2.34953e+06	1.47318e+06
2	DALYs (Disability-Adjusted Life Years)	42	Central Europe	1	Male	22	All ages	1048	COVID-19	1	Number	2021	Central Europe	3.82513e+06	4.62336e+06	3.00493e+06
2	DALYs (Disability-Adjusted Life Years)	56	Eastern Europe	1	Male	22	All ages	1048	COVID-19	1	Number	2021	Eastern Europe	7.9488e+06	9.74993e+06	6.32029e+06
2	DALYs (Disability-Adjusted Life Years)	65	High-income Asia Pacific	1	Male	22	All ages	1048	COVID-19	1	Number	2021	High-income Asia Pacific	295656	330509	265690
2	DALYs (Disability-Adjusted Life Years)	70	Australasia	1	Male	22	All ages	1048	COVID-19	1	Number	2021	Australasia	38110.1	44515.5	31012.3
2	DALYs (Disability-Adjusted Life Years)	73	Western Europe	1	Male	22	All ages	1048	COVID-19	1	Number	2021	Western Europe	4.75074e+06	4.98512e+06	4.55938e+06
2	DALYs (Disability-Adjusted Life Years)	96	Southern Latin America	1	Male	22	All ages	1048	COVID-19	1	Number	2021	Southern Latin America	1.406e+06	1.44883e+06	1.37776e+06
2	DALYs (Disability-Adjusted Life Years)	100	High-income North America	1	Male	22	All ages	1048	COVID-19	1	Number	2021	High-income North America	7.19697e+06	7.45657e+06	7.00444e+06
2	DALYs (Disability-Adjusted Life Years)	104	Caribbean	1	Male	22	All ages	1048	COVID-19	1	Number	2021	Caribbean	1.25773e+06	1.72918e+06	917880
2	DALYs (Disability-Adjusted Life Years)	120	Andean Latin America	1	Male	22	All ages	1048	COVID-19	1	Number	2021	Andean Latin America	2.87121e+06	3.0178e+06	2.69218e+06
2	DALYs (Disability-Adjusted Life Years)	124	Central Latin America	1	Male	22	All ages	1048	COVID-19	1	Number	2021	Central Latin America	7.94286e+06	9.60973e+06	6.36628e+06
2	DALYs (Disability-Adjusted Life Years)	134	Tropical Latin America	1	Male	22	All ages	1048	COVID-19	1	Number	2021	Tropical Latin America	7.21369e+06	7.91565e+06	6.55533e+06
2	DALYs (Disability-Adjusted Life Years)	138	North Africa and Middle East	1	Male	22	All ages	1048	COVID-19	1	Number	2021	North Africa and Middle East	1.31442e+07	1.47363e+07	1.16631e+07
2	DALYs (Disability-Adjusted Life Years)	159	South Asia	1	Male	22	All ages	1048	COVID-19	1	Number	2021	South Asia	3.7776e+07	4.11868e+07	3.57388e+07
2	DALYs (Disability-Adjusted Life Years)	167	Central Sub-Saharan Africa	1	Male	22	All ages	1048	COVID-19	1	Number	2021	Central Sub-Saharan Africa	2.66665e+06	3.1164e+06	2.28441e+06
2	DALYs (Disability-Adjusted Life Years)	174	Eastern Sub-Saharan Africa	1	Male	22	All ages	1048	COVID-19	1	Number	2021	Eastern Sub-Saharan Africa	9.86383e+06	1.08293e+07	8.82043e+06
2	DALYs (Disability-Adjusted Life Years)	192	Southern Sub-Saharan Africa	1	Male	22	All ages	1048	COVID-19	1	Number	2021	Southern Sub-Saharan Africa	3.77721e+06	3.99702e+06	3.5229e+06
2	DALYs (Disability-Adjusted Life Years)	199	Western Sub-Saharan Africa	1	Male	22	All ages	1048	COVID-19	1	Number	2021	Western Sub-Saharan Africa	6.77443e+06	7.53412e+06	6.14383e+06
2	DALYs (Disability-Adjusted Life Years)	5	East Asia	2	Female	22	All ages	1048	COVID-19	1	Number	2021	East Asia	18338.5	57108.2	5068.15
2	DALYs (Disability-Adjusted Life Years)	9	Southeast Asia	2	Female	22	All ages	1048	COVID-19	1	Number	2021	Southeast Asia	6.2034e+06	9.32171e+06	4.34918e+06
2	DALYs (Disability-Adjusted Life Years)	21	Oceania	2	Female	22	All ages	1048	COVID-19	1	Number	2021	Oceania	117051	222182	41276.3
2	DALYs (Disability-Adjusted Life Years)	32	Central Asia	2	Female	22	All ages	1048	COVID-19	1	Number	2021	Central Asia	1.28388e+06	1.60274e+06	998557
2	DALYs (Disability-Adjusted Life Years)	42	Central Europe	2	Female	22	All ages	1048	COVID-19	1	Number	2021	Central Europe	2.71767e+06	3.26833e+06	2.1491e+06
2	DALYs (Disability-Adjusted Life Years)	56	Eastern Europe	2	Female	22	All ages	1048	COVID-19	1	Number	2021	Eastern Europe	7.34593e+06	8.67221e+06	6.14454e+06
2	DALYs (Disability-Adjusted Life Years)	65	High-income Asia Pacific	2	Female	22	All ages	1048	COVID-19	1	Number	2021	High-income Asia Pacific	178365	215099	153469
2	DALYs (Disability-Adjusted Life Years)	70	Australasia	2	Female	22	All ages	1048	COVID-19	1	Number	2021	Australasia	23944.4	28064.1	19547.8
2	DALYs (Disability-Adjusted Life Years)	73	Western Europe	2	Female	22	All ages	1048	COVID-19	1	Number	2021	Western Europe	3.14886e+06	3.4681e+06	2.93656e+06
2	DALYs (Disability-Adjusted Life Years)	96	Southern Latin America	2	Female	22	All ages	1048	COVID-19	1	Number	2021	Southern Latin America	912477	977791	879741
2	DALYs (Disability-Adjusted Life Years)	100	High-income North America	2	Female	22	All ages	1048	COVID-19	1	Number	2021	High-income North America	4.52568e+06	4.95048e+06	4.31233e+06
2	DALYs (Disability-Adjusted Life Years)	104	Caribbean	2	Female	22	All ages	1048	COVID-19	1	Number	2021	Caribbean	714388	967771	527290
2	DALYs (Disability-Adjusted Life Years)	120	Andean Latin America	2	Female	22	All ages	1048	COVID-19	1	Number	2021	Andean Latin America	1.60223e+06	1.76955e+06	1.47627e+06
2	DALYs (Disability-Adjusted Life Years)	124	Central Latin America	2	Female	22	All ages	1048	COVID-19	1	Number	2021	Central Latin America	4.98693e+06	6.13452e+06	3.93152e+06
2	DALYs (Disability-Adjusted Life Years)	134	Tropical Latin America	2	Female	22	All ages	1048	COVID-19	1	Number	2021	Tropical Latin America	4.93671e+06	5.68089e+06	4.46624e+06
2	DALYs (Disability-Adjusted Life Years)	138	North Africa and Middle East	2	Female	22	All ages	1048	COVID-19	1	Number	2021	North Africa and Middle East	6.69485e+06	7.89821e+06	5.80972e+06
2	DALYs (Disability-Adjusted Life Years)	159	South Asia	2	Female	22	All ages	1048	COVID-19	1	Number	2021	South Asia	2.08693e+07	2.48438e+07	1.86216e+07
2	DALYs (Disability-Adjusted Life Years)	167	Central Sub-Saharan Africa	2	Female	22	All ages	1048	COVID-19	1	Number	2021	Central Sub-Saharan Africa	1.61673e+06	2.02127e+06	1.34807e+06
2	DALYs (Disability-Adjusted Life Years)	174	Eastern Sub-Saharan Africa	2	Female	22	All ages	1048	COVID-19	1	Number	2021	Eastern Sub-Saharan Africa	5.79957e+06	6.91221e+06	5.07069e+06
2	DALYs (Disability-Adjusted Life Years)	192	Southern Sub-Saharan Africa	2	Female	22	All ages	1048	COVID-19	1	Number	2021	Southern Sub-Saharan Africa	2.46446e+06	2.69494e+06	2.27563e+06
2	DALYs (Disability-Adjusted Life Years)	199	Western Sub-Saharan Africa	2	Female	22	All ages	1048	COVID-19	1	Number	2021	Western Sub-Saharan Africa	4.07591e+06	5.01318e+06	3.52962e+06
2	DALYs (Disability-Adjusted Life Years)	5	East Asia	3	Both	22	All ages	1048	COVID-19	1	Number	2021	East Asia	49673.6	160387	12853.2
2	DALYs (Disability-Adjusted Life Years)	9	Southeast Asia	3	Both	22	All ages	1048	COVID-19	1	Number	2021	Southeast Asia	1.70274e+07	2.6046e+07	1.19817e+07
2	DALYs (Disability-Adjusted Life Years)	21	Oceania	3	Both	22	All ages	1048	COVID-19	1	Number	2021	Oceania	352532	679096	123112
2	DALYs (Disability-Adjusted Life Years)	32	Central Asia	3	Both	22	All ages	1048	COVID-19	1	Number	2021	Central Asia	3.2168e+06	3.92404e+06	2.47085e+06
2	DALYs (Disability-Adjusted Life Years)	42	Central Europe	3	Both	22	All ages	1048	COVID-19	1	Number	2021	Central Europe	6.5428e+06	7.82675e+06	5.18179e+06
2	DALYs (Disability-Adjusted Life Years)	56	Eastern Europe	3	Both	22	All ages	1048	COVID-19	1	Number	2021	Eastern Europe	1.52947e+07	1.7477e+07	1.30006e+07
2	DALYs (Disability-Adjusted Life Years)	65	High-income Asia Pacific	3	Both	22	All ages	1048	COVID-19	1	Number	2021	High-income Asia Pacific	474021	537117	425864
2	DALYs (Disability-Adjusted Life Years)	70	Australasia	3	Both	22	All ages	1048	COVID-19	1	Number	2021	Australasia	62054.5	72604.4	50526.2
2	DALYs (Disability-Adjusted Life Years)	73	Western Europe	3	Both	22	All ages	1048	COVID-19	1	Number	2021	Western Europe	7.8996e+06	8.41768e+06	7.51463e+06
2	DALYs (Disability-Adjusted Life Years)	96	Southern Latin America	3	Both	22	All ages	1048	COVID-19	1	Number	2021	Southern Latin America	2.31848e+06	2.41999e+06	2.2615e+06
2	DALYs (Disability-Adjusted Life Years)	100	High-income North America	3	Both	22	All ages	1048	COVID-19	1	Number	2021	High-income North America	1.17226e+07	1.23876e+07	1.13209e+07
2	DALYs (Disability-Adjusted Life Years)	104	Caribbean	3	Both	22	All ages	1048	COVID-19	1	Number	2021	Caribbean	1.97212e+06	2.69825e+06	1.44854e+06
2	DALYs (Disability-Adjusted Life Years)	120	Andean Latin America	3	Both	22	All ages	1048	COVID-19	1	Number	2021	Andean Latin America	4.47345e+06	4.76386e+06	4.17531e+06
2	DALYs (Disability-Adjusted Life Years)	124	Central Latin America	3	Both	22	All ages	1048	COVID-19	1	Number	2021	Central Latin America	1.29298e+07	1.5209e+07	1.09641e+07
2	DALYs (Disability-Adjusted Life Years)	134	Tropical Latin America	3	Both	22	All ages	1048	COVID-19	1	Number	2021	Tropical Latin America	1.21504e+07	1.32994e+07	1.13011e+07
2	DALYs (Disability-Adjusted Life Years)	138	North Africa and Middle East	3	Both	22	All ages	1048	COVID-19	1	Number	2021	North Africa and Middle East	1.98391e+07	2.25157e+07	1.75531e+07
2	DALYs (Disability-Adjusted Life Years)	159	South Asia	3	Both	22	All ages	1048	COVID-19	1	Number	2021	South Asia	5.86453e+07	6.58858e+07	5.44573e+07
2	DALYs (Disability-Adjusted Life Years)	167	Central Sub-Saharan Africa	3	Both	22	All ages	1048	COVID-19	1	Number	2021	Central Sub-Saharan Africa	4.28338e+06	5.06403e+06	3.62154e+06
2	DALYs (Disability-Adjusted Life Years)	174	Eastern Sub-Saharan Africa	3	Both	22	All ages	1048	COVID-19	1	Number	2021	Eastern Sub-Saharan Africa	1.56634e+07	1.76616e+07	1.38911e+07
2	DALYs (Disability-Adjusted Life Years)	192	Southern Sub-Saharan Africa	3	Both	22	All ages	1048	COVID-19	1	Number	2021	Southern Sub-Saharan Africa	6.24168e+06	6.6787e+06	5.80615e+06
2	DALYs (Disability-Adjusted Life Years)	199	Western Sub-Saharan Africa	3	Both	22	All ages	1048	COVID-19	1	Number	2021	Western Sub-Saharan Africa	1.08503e+07	1.24402e+07	9.7046e+06
6	Incidence	5	East Asia	1	Male	22	All ages	1048	COVID-19	1	Number	2021	East Asia	100297	124531	84352.7
6	Incidence	9	Southeast Asia	1	Male	22	All ages	1048	COVID-19	1	Number	2021	Southeast Asia	1.10047e+08	1.20155e+08	9.99814e+07
6	Incidence	21	Oceania	1	Male	22	All ages	1048	COVID-19	1	Number	2021	Oceania	2.49206e+06	3.71845e+06	1.29245e+06
6	Incidence	32	Central Asia	1	Male	22	All ages	1048	COVID-19	1	Number	2021	Central Asia	2.07114e+07	2.60188e+07	1.5469e+07
6	Incidence	42	Central Europe	1	Male	22	All ages	1048	COVID-19	1	Number	2021	Central Europe	2.5335e+07	2.75381e+07	2.28434e+07
6	Incidence	56	Eastern Europe	1	Male	22	All ages	1048	COVID-19	1	Number	2021	Eastern Europe	5.82948e+07	6.44811e+07	5.18682e+07
6	Incidence	65	High-income Asia Pacific	1	Male	22	All ages	1048	COVID-19	1	Number	2021	High-income Asia Pacific	3.1519e+06	3.69642e+06	2.89746e+06
6	Incidence	70	Australasia	1	Male	22	All ages	1048	COVID-19	1	Number	2021	Australasia	168394	184876	152036
6	Incidence	73	Western Europe	1	Male	22	All ages	1048	COVID-19	1	Number	2021	Western Europe	3.221e+07	3.43086e+07	3.05566e+07
6	Incidence	96	Southern Latin America	1	Male	22	All ages	1048	COVID-19	1	Number	2021	Southern Latin America	5.35449e+06	7.16763e+06	4.32574e+06
6	Incidence	100	High-income North America	1	Male	22	All ages	1048	COVID-19	1	Number	2021	High-income North America	3.27262e+07	3.43713e+07	3.11113e+07
6	Incidence	104	Caribbean	1	Male	22	All ages	1048	COVID-19	1	Number	2021	Caribbean	4.65303e+06	6.73564e+06	3.04474e+06
6	Incidence	120	Andean Latin America	1	Male	22	All ages	1048	COVID-19	1	Number	2021	Andean Latin America	1.21694e+07	1.47134e+07	9.81641e+06
6	Incidence	124	Central Latin America	1	Male	22	All ages	1048	COVID-19	1	Number	2021	Central Latin America	3.91893e+07	4.20256e+07	3.60747e+07
6	Incidence	134	Tropical Latin America	1	Male	22	All ages	1048	COVID-19	1	Number	2021	Tropical Latin America	4.04473e+07	4.46452e+07	3.65759e+07
6	Incidence	138	North Africa and Middle East	1	Male	22	All ages	1048	COVID-19	1	Number	2021	North Africa and Middle East	1.07482e+08	1.24647e+08	8.72596e+07
6	Incidence	159	South Asia	1	Male	22	All ages	1048	COVID-19	1	Number	2021	South Asia	4.01107e+08	4.41721e+08	3.60818e+08
6	Incidence	167	Central Sub-Saharan Africa	1	Male	22	All ages	1048	COVID-19	1	Number	2021	Central Sub-Saharan Africa	2.8924e+07	3.53493e+07	2.16354e+07
6	Incidence	174	Eastern Sub-Saharan Africa	1	Male	22	All ages	1048	COVID-19	1	Number	2021	Eastern Sub-Saharan Africa	1.15091e+08	1.22426e+08	1.06724e+08
6	Incidence	192	Southern Sub-Saharan Africa	1	Male	22	All ages	1048	COVID-19	1	Number	2021	Southern Sub-Saharan Africa	1.88143e+07	2.05389e+07	1.5795e+07
6	Incidence	199	Western Sub-Saharan Africa	1	Male	22	All ages	1048	COVID-19	1	Number	2021	Western Sub-Saharan Africa	8.06558e+07	9.06207e+07	7.05957e+07
6	Incidence	5	East Asia	2	Female	22	All ages	1048	COVID-19	1	Number	2021	East Asia	96700.8	120502	81079.5
6	Incidence	9	Southeast Asia	2	Female	22	All ages	1048	COVID-19	1	Number	2021	Southeast Asia	1.07303e+08	1.1738e+08	9.74357e+07
6	Incidence	21	Oceania	2	Female	22	All ages	1048	COVID-19	1	Number	2021	Oceania	2.31631e+06	3.44326e+06	1.20402e+06
6	Incidence	32	Central Asia	2	Female	22	All ages	1048	COVID-19	1	Number	2021	Central Asia	2.1243e+07	2.66748e+07	1.58882e+07
6	Incidence	42	Central Europe	2	Female	22	All ages	1048	COVID-19	1	Number	2021	Central Europe	2.64869e+07	2.87761e+07	2.3884e+07
6	Incidence	56	Eastern Europe	2	Female	22	All ages	1048	COVID-19	1	Number	2021	Eastern Europe	6.72088e+07	7.44099e+07	5.97657e+07
6	Incidence	65	High-income Asia Pacific	2	Female	22	All ages	1048	COVID-19	1	Number	2021	High-income Asia Pacific	3.22499e+06	3.76225e+06	2.97161e+06
6	Incidence	70	Australasia	2	Female	22	All ages	1048	COVID-19	1	Number	2021	Australasia	171906	188713	155161
6	Incidence	73	Western Europe	2	Female	22	All ages	1048	COVID-19	1	Number	2021	Western Europe	3.30112e+07	3.52078e+07	3.12949e+07
6	Incidence	96	Southern Latin America	2	Female	22	All ages	1048	COVID-19	1	Number	2021	Southern Latin America	5.53507e+06	7.40225e+06	4.47232e+06
6	Incidence	100	High-income North America	2	Female	22	All ages	1048	COVID-19	1	Number	2021	High-income North America	3.3485e+07	3.51608e+07	3.18462e+07
6	Incidence	104	Caribbean	2	Female	22	All ages	1048	COVID-19	1	Number	2021	Caribbean	4.76205e+06	6.93622e+06	3.09292e+06
6	Incidence	120	Andean Latin America	2	Female	22	All ages	1048	COVID-19	1	Number	2021	Andean Latin America	1.21708e+07	1.46943e+07	9.81837e+06
6	Incidence	124	Central Latin America	2	Female	22	All ages	1048	COVID-19	1	Number	2021	Central Latin America	4.12922e+07	4.43191e+07	3.79803e+07
6	Incidence	134	Tropical Latin America	2	Female	22	All ages	1048	COVID-19	1	Number	2021	Tropical Latin America	4.24207e+07	4.68865e+07	3.83599e+07
6	Incidence	138	North Africa and Middle East	2	Female	22	All ages	1048	COVID-19	1	Number	2021	North Africa and Middle East	1.01183e+08	1.17347e+08	8.24968e+07
6	Incidence	159	South Asia	2	Female	22	All ages	1048	COVID-19	1	Number	2021	South Asia	3.86459e+08	4.25086e+08	3.47411e+08
6	Incidence	167	Central Sub-Saharan Africa	2	Female	22	All ages	1048	COVID-19	1	Number	2021	Central Sub-Saharan Africa	2.93547e+07	3.57454e+07	2.1993e+07
6	Incidence	174	Eastern Sub-Saharan Africa	2	Female	22	All ages	1048	COVID-19	1	Number	2021	Eastern Sub-Saharan Africa	1.17885e+08	1.25402e+08	1.09304e+08
6	Incidence	192	Southern Sub-Saharan Africa	2	Female	22	All ages	1048	COVID-19	1	Number	2021	Southern Sub-Saharan Africa	1.98781e+07	2.17107e+07	1.65763e+07
6	Incidence	199	Western Sub-Saharan Africa	2	Female	22	All ages	1048	COVID-19	1	Number	2021	Western Sub-Saharan Africa	8.51056e+07	9.51867e+07	7.47827e+07
6	Incidence	5	East Asia	3	Both	22	All ages	1048	COVID-19	1	Number	2021	East Asia	196998	245033	165434
6	Incidence	9	Southeast Asia	3	Both	22	All ages	1048	COVID-19	1	Number	2021	Southeast Asia	2.17349e+08	2.37502e+08	1.97482e+08
6	Incidence	21	Oceania	3	Both	22	All ages	1048	COVID-19	1	Number	2021	Oceania	4.80837e+06	7.15705e+06	2.49647e+06
6	Incidence	32	Central Asia	3	Both	22	All ages	1048	COVID-19	1	Number	2021	Central Asia	4.19544e+07	5.2702e+07	3.13531e+07
6	Incidence	42	Central Europe	3	Both	22	All ages	1048	COVID-19	1	Number	2021	Central Europe	5.18219e+07	5.63119e+07	4.67274e+07
6	Incidence	56	Eastern Europe	3	Both	22	All ages	1048	COVID-19	1	Number	2021	Eastern Europe	1.25504e+08	1.3889e+08	1.11687e+08
6	Incidence	65	High-income Asia Pacific	3	Both	22	All ages	1048	COVID-19	1	Number	2021	High-income Asia Pacific	6.37689e+06	7.46422e+06	5.86907e+06
6	Incidence	70	Australasia	3	Both	22	All ages	1048	COVID-19	1	Number	2021	Australasia	340300	373551	307197
6	Incidence	73	Western Europe	3	Both	22	All ages	1048	COVID-19	1	Number	2021	Western Europe	6.52212e+07	6.95165e+07	6.18564e+07
6	Incidence	96	Southern Latin America	3	Both	22	All ages	1048	COVID-19	1	Number	2021	Southern Latin America	1.08896e+07	1.45778e+07	8.79805e+06
6	Incidence	100	High-income North America	3	Both	22	All ages	1048	COVID-19	1	Number	2021	High-income North America	6.62112e+07	6.95321e+07	6.2958e+07
6	Incidence	104	Caribbean	3	Both	22	All ages	1048	COVID-19	1	Number	2021	Caribbean	9.41508e+06	1.36702e+07	6.13544e+06
6	Incidence	120	Andean Latin America	3	Both	22	All ages	1048	COVID-19	1	Number	2021	Andean Latin America	2.43401e+07	2.94126e+07	1.96348e+07
6	Incidence	124	Central Latin America	3	Both	22	All ages	1048	COVID-19	1	Number	2021	Central Latin America	8.04815e+07	8.63447e+07	7.40465e+07
6	Incidence	134	Tropical Latin America	3	Both	22	All ages	1048	COVID-19	1	Number	2021	Tropical Latin America	8.28679e+07	9.15315e+07	7.49358e+07
6	Incidence	138	North Africa and Middle East	3	Both	22	All ages	1048	COVID-19	1	Number	2021	North Africa and Middle East	2.08665e+08	2.41915e+08	1.6975e+08
6	Incidence	159	South Asia	3	Both	22	All ages	1048	COVID-19	1	Number	2021	South Asia	7.87566e+08	8.66657e+08	7.08229e+08
6	Incidence	167	Central Sub-Saharan Africa	3	Both	22	All ages	1048	COVID-19	1	Number	2021	Central Sub-Saharan Africa	5.82787e+07	7.10947e+07	4.36514e+07
6	Incidence	174	Eastern Sub-Saharan Africa	3	Both	22	All ages	1048	COVID-19	1	Number	2021	Eastern Sub-Saharan Africa	2.32976e+08	2.47769e+08	2.16028e+08
6	Incidence	192	Southern Sub-Saharan Africa	3	Both	22	All ages	1048	COVID-19	1	Number	2021	Southern Sub-Saharan Africa	3.86924e+07	4.22528e+07	3.23713e+07
6	Incidence	199	Western Sub-Saharan Africa	3	Both	22	All ages	1048	COVID-19	1	Number	2021	Western Sub-Saharan Africa	1.65761e+08	1.85807e+08	1.45444e+08

## Sheet: The Age-standardized Rate
measure_id	measure_name	location_id	location_name	sex_id	sex_name	age_id	age_name	cause_id	cause_name	metric_id	metric_name	year	val	upper	lower
1	Deaths	5	East Asia	3	Both	27	Age-standardized	1048	COVID-19	3	Rate	2020	1.45702	7.3107	0.309517
1	Deaths	9	Southeast Asia	3	Both	27	Age-standardized	1048	COVID-19	3	Rate	2020	19.6755	38.0614	7.80257
1	Deaths	21	Oceania	3	Both	27	Age-standardized	1048	COVID-19	3	Rate	2020	18.3105	37.2286	5.77338
1	Deaths	32	Central Asia	3	Both	27	Age-standardized	1048	COVID-19	3	Rate	2020	122.711	149.568	91.1314
1	Deaths	42	Central Europe	3	Both	27	Age-standardized	1048	COVID-19	3	Rate	2020	72.075	87.8264	56.2219
1	Deaths	56	Eastern Europe	3	Both	27	Age-standardized	1048	COVID-19	3	Rate	2020	62.8347	72.9503	54.0993
1	Deaths	65	High-income Asia Pacific	3	Both	27	Age-standardized	1048	COVID-19	3	Rate	2020	0.883835	1.08048	0.747013
1	Deaths	70	Australasia	3	Both	27	Age-standardized	1048	COVID-19	3	Rate	2020	1.69374	1.76653	1.61172
1	Deaths	73	Western Europe	3	Both	27	Age-standardized	1048	COVID-19	3	Rate	2020	38.9833	40.1943	37.6614
1	Deaths	96	Southern Latin America	3	Both	27	Age-standardized	1048	COVID-19	3	Rate	2020	74.0987	76.4465	71.8721
1	Deaths	100	High-income North America	3	Both	27	Age-standardized	1048	COVID-19	3	Rate	2020	72.7719	75.3187	70.2957
1	Deaths	104	Caribbean	3	Both	27	Age-standardized	1048	COVID-19	3	Rate	2020	37.9724	61.2154	21.0465
1	Deaths	120	Andean Latin America	3	Both	27	Age-standardized	1048	COVID-19	3	Rate	2020	284.668	330.387	246.275
1	Deaths	124	Central Latin America	3	Both	27	Age-standardized	1048	COVID-19	3	Rate	2020	171.015	195.361	147.298
1	Deaths	134	Tropical Latin America	3	Both	27	Age-standardized	1048	COVID-19	3	Rate	2020	82.467	89.5882	76.4856
1	Deaths	138	North Africa and Middle East	3	Both	27	Age-standardized	1048	COVID-19	3	Rate	2020	123.904	137.353	107.097
1	Deaths	159	South Asia	3	Both	27	Age-standardized	1048	COVID-19	3	Rate	2020	101.814	108.487	95.2279
1	Deaths	167	Central Sub-Saharan Africa	3	Both	27	Age-standardized	1048	COVID-19	3	Rate	2020	165.903	184.056	150.033
1	Deaths	174	Eastern Sub-Saharan Africa	3	Both	27	Age-standardized	1048	COVID-19	3	Rate	2020	155.13	167.909	144.063
1	Deaths	192	Southern Sub-Saharan Africa	3	Both	27	Age-standardized	1048	COVID-19	3	Rate	2020	254.463	258.005	250.744
1	Deaths	199	Western Sub-Saharan Africa	3	Both	27	Age-standardized	1048	COVID-19	3	Rate	2020	130.466	142.141	118.331
2	DALYs (Disability-Adjusted Life Years)	5	East Asia	3	Both	27	Age-standardized	1048	COVID-19	3	Rate	2020	31.5185	157.373	7.4549
2	DALYs (Disability-Adjusted Life Years)	9	Southeast Asia	3	Both	27	Age-standardized	1048	COVID-19	3	Rate	2020	524.109	979.779	229.565
2	DALYs (Disability-Adjusted Life Years)	21	Oceania	3	Both	27	Age-standardized	1048	COVID-19	3	Rate	2020	421.357	861.875	123.646
2	DALYs (Disability-Adjusted Life Years)	32	Central Asia	3	Both	27	Age-standardized	1048	COVID-19	3	Rate	2020	2800.48	3410.35	2100.82
2	DALYs (Disability-Adjusted Life Years)	42	Central Europe	3	Both	27	Age-standardized	1048	COVID-19	3	Rate	2020	1610.27	1966.31	1264.08
2	DALYs (Disability-Adjusted Life Years)	56	Eastern Europe	3	Both	27	Age-standardized	1048	COVID-19	3	Rate	2020	1504.12	1747.24	1276.65
2	DALYs (Disability-Adjusted Life Years)	65	High-income Asia Pacific	3	Both	27	Age-standardized	1048	COVID-19	3	Rate	2020	20.8595	26.0617	17.0977
2	DALYs (Disability-Adjusted Life Years)	70	Australasia	3	Both	27	Age-standardized	1048	COVID-19	3	Rate	2020	31.5248	33.6011	29.7184
2	DALYs (Disability-Adjusted Life Years)	73	Western Europe	3	Both	27	Age-standardized	1048	COVID-19	3	Rate	2020	828.359	872.423	792.563
2	DALYs (Disability-Adjusted Life Years)	96	Southern Latin America	3	Both	27	Age-standardized	1048	COVID-19	3	Rate	2020	1638.38	1703.83	1582.13
2	DALYs (Disability-Adjusted Life Years)	100	High-income North America	3	Both	27	Age-standardized	1048	COVID-19	3	Rate	2020	1927.7	2006.67	1850.72
2	DALYs (Disability-Adjusted Life Years)	104	Caribbean	3	Both	27	Age-standardized	1048	COVID-19	3	Rate	2020	1009.65	1616.92	572.594
2	DALYs (Disability-Adjusted Life Years)	120	Andean Latin America	3	Both	27	Age-standardized	1048	COVID-19	3	Rate	2020	6719.2	7811.69	5787.89
2	DALYs (Disability-Adjusted Life Years)	124	Central Latin America	3	Both	27	Age-standardized	1048	COVID-19	3	Rate	2020	4292.49	4923.69	3667.88
2	DALYs (Disability-Adjusted Life Years)	134	Tropical Latin America	3	Both	27	Age-standardized	1048	COVID-19	3	Rate	2020	2040.21	2241.72	1865.42
2	DALYs (Disability-Adjusted Life Years)	138	North Africa and Middle East	3	Both	27	Age-standardized	1048	COVID-19	3	Rate	2020	2778.67	3127.27	2416.26
2	DALYs (Disability-Adjusted Life Years)	159	South Asia	3	Both	27	Age-standardized	1048	COVID-19	3	Rate	2020	2395.44	2588.22	2223.2
2	DALYs (Disability-Adjusted Life Years)	167	Central Sub-Saharan Africa	3	Both	27	Age-standardized	1048	COVID-19	3	Rate	2020	3891.28	4318.01	3486.08
2	DALYs (Disability-Adjusted Life Years)	174	Eastern Sub-Saharan Africa	3	Both	27	Age-standardized	1048	COVID-19	3	Rate	2020	3595.8	3882.69	3343.51
2	DALYs (Disability-Adjusted Life Years)	192	Southern Sub-Saharan Africa	3	Both	27	Age-standardized	1048	COVID-19	3	Rate	2020	5744.82	5867.11	5633.56
2	DALYs (Disability-Adjusted Life Years)	199	Western Sub-Saharan Africa	3	Both	27	Age-standardized	1048	COVID-19	3	Rate	2020	3039.44	3335.42	2752.64
6	Incidence	5	East Asia	3	Both	27	Age-standardized	1048	COVID-19	3	Rate	2020	177.542	205.854	154.809
6	Incidence	9	Southeast Asia	3	Both	27	Age-standardized	1048	COVID-19	3	Rate	2020	9060.5	9843.72	8249.7
6	Incidence	21	Oceania	3	Both	27	Age-standardized	1048	COVID-19	3	Rate	2020	1283.35	2180.84	782.081
6	Incidence	32	Central Asia	3	Both	27	Age-standardized	1048	COVID-19	3	Rate	2020	31060.6	37232.6	22496.9
6	Incidence	42	Central Europe	3	Both	27	Age-standardized	1048	COVID-19	3	Rate	2020	28121.5	30612.7	25462.1
6	Incidence	56	Eastern Europe	3	Both	27	Age-standardized	1048	COVID-19	3	Rate	2020	32795.6	36410.4	29017.2
6	Incidence	65	High-income Asia Pacific	3	Both	27	Age-standardized	1048	COVID-19	3	Rate	2020	1227.93	1311.36	1149.51
6	Incidence	70	Australasia	3	Both	27	Age-standardized	1048	COVID-19	3	Rate	2020	272.705	321.527	233.909
6	Incidence	73	Western Europe	3	Both	27	Age-standardized	1048	COVID-19	3	Rate	2020	11219.3	12343.1	10465.1
6	Incidence	96	Southern Latin America	3	Both	27	Age-standardized	1048	COVID-19	3	Rate	2020	10520	14593	8044.8
6	Incidence	100	High-income North America	3	Both	27	Age-standardized	1048	COVID-19	3	Rate	2020	16084.7	16783.6	15442.8
6	Incidence	104	Caribbean	3	Both	27	Age-standardized	1048	COVID-19	3	Rate	2020	9856.45	13647.6	5817.22
6	Incidence	120	Andean Latin America	3	Both	27	Age-standardized	1048	COVID-19	3	Rate	2020	42937.6	50212.3	35808.6
6	Incidence	124	Central Latin America	3	Both	27	Age-standardized	1048	COVID-19	3	Rate	2020	32644	34434.9	30772
6	Incidence	134	Tropical Latin America	3	Both	27	Age-standardized	1048	COVID-19	3	Rate	2020	29031.3	31451.6	26575.6
6	Incidence	138	North Africa and Middle East	3	Both	27	Age-standardized	1048	COVID-19	3	Rate	2020	32223.4	37343.5	25486.8
6	Incidence	159	South Asia	3	Both	27	Age-standardized	1048	COVID-19	3	Rate	2020	29969.2	33044.7	27388.6
6	Incidence	167	Central Sub-Saharan Africa	3	Both	27	Age-standardized	1048	COVID-19	3	Rate	2020	46494.8	54215.8	30971
6	Incidence	174	Eastern Sub-Saharan Africa	3	Both	27	Age-standardized	1048	COVID-19	3	Rate	2020	27611.6	29046.1	26055.4
6	Incidence	192	Southern Sub-Saharan Africa	3	Both	27	Age-standardized	1048	COVID-19	3	Rate	2020	28776.6	31397.7	25976
6	Incidence	199	Western Sub-Saharan Africa	3	Both	27	Age-standardized	1048	COVID-19	3	Rate	2020	40094	42636.9	37650
1	Deaths	5	East Asia	3	Both	27	Age-standardized	1048	COVID-19	3	Rate	2021	0.191361	0.651762	0.0447942
1	Deaths	9	Southeast Asia	3	Both	27	Age-standardized	1048	COVID-19	3	Rate	2021	99.7081	156.149	70.6392
1	Deaths	21	Oceania	3	Both	27	Age-standardized	1048	COVID-19	3	Rate	2021	165.607	320.154	47.0935
1	Deaths	32	Central Asia	3	Both	27	Age-standardized	1048	COVID-19	3	Rate	2021	157.285	188.561	118.344
1	Deaths	42	Central Europe	3	Both	27	Age-standardized	1048	COVID-19	3	Rate	2021	136.318	164.503	106.878
1	Deaths	56	Eastern Europe	3	Both	27	Age-standardized	1048	COVID-19	3	Rate	2021	191.696	217.329	166.376
1	Deaths	65	High-income Asia Pacific	3	Both	27	Age-standardized	1048	COVID-19	3	Rate	2021	4.88258	5.34197	4.46332
1	Deaths	70	Australasia	3	Both	27	Age-standardized	1048	COVID-19	3	Rate	2021	5.95452	6.97145	4.83397
1	Deaths	73	Western Europe	3	Both	27	Age-standardized	1048	COVID-19	3	Rate	2021	41.6468	42.857	40.5244
1	Deaths	96	Southern Latin America	3	Both	27	Age-standardized	1048	COVID-19	3	Rate	2021	121.392	122.634	120.138
1	Deaths	100	High-income North America	3	Both	27	Age-standardized	1048	COVID-19	3	Rate	2021	80.4626	82.1743	78.9145
1	Deaths	104	Caribbean	3	Both	27	Age-standardized	1048	COVID-19	3	Rate	2021	158.957	212.258	118.736
1	Deaths	120	Andean Latin America	3	Both	27	Age-standardized	1048	COVID-19	3	Rate	2021	317.334	331.913	300.149
1	Deaths	124	Central Latin America	3	Both	27	Age-standardized	1048	COVID-19	3	Rate	2021	198.526	231.195	170.256
1	Deaths	134	Tropical Latin America	3	Both	27	Age-standardized	1048	COVID-19	3	Rate	2021	171.858	183.113	160.774
1	Deaths	138	North Africa and Middle East	3	Both	27	Age-standardized	1048	COVID-19	3	Rate	2021	172.438	190.779	151.894
1	Deaths	159	South Asia	3	Both	27	Age-standardized	1048	COVID-19	3	Rate	2021	156.523	163.703	150.871
1	Deaths	167	Central Sub-Saharan Africa	3	Both	27	Age-standardized	1048	COVID-19	3	Rate	2021	266.454	314.571	231.285
1	Deaths	174	Eastern Sub-Saharan Africa	3	Both	27	Age-standardized	1048	COVID-19	3	Rate	2021	315.199	339.661	282.999
1	Deaths	192	Southern Sub-Saharan Africa	3	Both	27	Age-standardized	1048	COVID-19	3	Rate	2021	420.681	437.35	398.712
1	Deaths	199	Western Sub-Saharan Africa	3	Both	27	Age-standardized	1048	COVID-19	3	Rate	2021	190.259	205.432	171.532
2	DALYs (Disability-Adjusted Life Years)	5	East Asia	3	Both	27	Age-standardized	1048	COVID-19	3	Rate	2021	2.8406	9.17325	0.766421
2	DALYs (Disability-Adjusted Life Years)	9	Southeast Asia	3	Both	27	Age-standardized	1048	COVID-19	3	Rate	2021	2515.25	3850.19	1774.4
2	DALYs (Disability-Adjusted Life Years)	21	Oceania	3	Both	27	Age-standardized	1048	COVID-19	3	Rate	2021	3979.92	7665.59	1415.16
2	DALYs (Disability-Adjusted Life Years)	32	Central Asia	3	Both	27	Age-standardized	1048	COVID-19	3	Rate	2021	3776.15	4602.6	2919.53
2	DALYs (Disability-Adjusted Life Years)	42	Central Europe	3	Both	27	Age-standardized	1048	COVID-19	3	Rate	2021	3303.48	3975.72	2633.43
2	DALYs (Disability-Adjusted Life Years)	56	Eastern Europe	3	Both	27	Age-standardized	1048	COVID-19	3	Rate	2021	4712.68	5450.71	3952.79
2	DALYs (Disability-Adjusted Life Years)	65	High-income Asia Pacific	3	Both	27	Age-standardized	1048	COVID-19	3	Rate	2021	123.763	149.667	107.607
2	DALYs (Disability-Adjusted Life Years)	70	Australasia	3	Both	27	Age-standardized	1048	COVID-19	3	Rate	2021	124.202	145.597	101.395
2	DALYs (Disability-Adjusted Life Years)	73	Western Europe	3	Both	27	Age-standardized	1048	COVID-19	3	Rate	2021	975.624	1084.93	909.434
2	DALYs (Disability-Adjusted Life Years)	96	Southern Latin America	3	Both	27	Age-standardized	1048	COVID-19	3	Rate	2021	2758.91	2899.79	2681.61
2	DALYs (Disability-Adjusted Life Years)	100	High-income North America	3	Both	27	Age-standardized	1048	COVID-19	3	Rate	2021	2221.69	2401.42	2130.83
2	DALYs (Disability-Adjusted Life Years)	104	Caribbean	3	Both	27	Age-standardized	1048	COVID-19	3	Rate	2021	3710.61	5092.55	2719.87
2	DALYs (Disability-Adjusted Life Years)	120	Andean Latin America	3	Both	27	Age-standardized	1048	COVID-19	3	Rate	2021	7337.99	7775.15	6860.88
2	DALYs (Disability-Adjusted Life Years)	124	Central Latin America	3	Both	27	Age-standardized	1048	COVID-19	3	Rate	2021	5046.91	5927.55	4286.58
2	DALYs (Disability-Adjusted Life Years)	134	Tropical Latin America	3	Both	27	Age-standardized	1048	COVID-19	3	Rate	2021	4691.27	5159.43	4356.12
2	DALYs (Disability-Adjusted Life Years)	138	North Africa and Middle East	3	Both	27	Age-standardized	1048	COVID-19	3	Rate	2021	4015.87	4514.41	3561.3
2	DALYs (Disability-Adjusted Life Years)	159	South Asia	3	Both	27	Age-standardized	1048	COVID-19	3	Rate	2021	3778.09	4191.74	3536.35
2	DALYs (Disability-Adjusted Life Years)	167	Central Sub-Saharan Africa	3	Both	27	Age-standardized	1048	COVID-19	3	Rate	2021	6333.55	7395.46	5441.27
2	DALYs (Disability-Adjusted Life Years)	174	Eastern Sub-Saharan Africa	3	Both	27	Age-standardized	1048	COVID-19	3	Rate	2021	7476.07	8190.62	6688.62
2	DALYs (Disability-Adjusted Life Years)	192	Southern Sub-Saharan Africa	3	Both	27	Age-standardized	1048	COVID-19	3	Rate	2021	9952.56	10560.8	9312.19
2	DALYs (Disability-Adjusted Life Years)	199	Western Sub-Saharan Africa	3	Both	27	Age-standardized	1048	COVID-19	3	Rate	2021	4496.38	4973.47	4072.06
6	Incidence	5	East Asia	3	Both	27	Age-standardized	1048	COVID-19	3	Rate	2021	14.4321	17.8462	12.1298
6	Incidence	9	Southeast Asia	3	Both	27	Age-standardized	1048	COVID-19	3	Rate	2021	31065.7	33925.7	28230.3
6	Incidence	21	Oceania	3	Both	27	Age-standardized	1048	COVID-19	3	Rate	2021	32963.5	48996.7	17227.6
6	Incidence	32	Central Asia	3	Both	27	Age-standardized	1048	COVID-19	3	Rate	2021	43721.6	54890.7	32721.7
6	Incidence	42	Central Europe	3	Both	27	Age-standardized	1048	COVID-19	3	Rate	2021	43678.3	47435.3	39325.5
6	Incidence	56	Eastern Europe	3	Both	27	Age-standardized	1048	COVID-19	3	Rate	2021	58681.1	64812.5	52343.5
6	Incidence	65	High-income Asia Pacific	3	Both	27	Age-standardized	1048	COVID-19	3	Rate	2021	3543.21	4181.21	3250.39
6	Incidence	70	Australasia	3	Both	27	Age-standardized	1048	COVID-19	3	Rate	2021	1102.76	1210.14	996.047
6	Incidence	73	Western Europe	3	Both	27	Age-standardized	1048	COVID-19	3	Rate	2021	15361.7	16375.3	14572.7
6	Incidence	96	Southern Latin America	3	Both	27	Age-standardized	1048	COVID-19	3	Rate	2021	16051.8	21515.9	12960.5
6	Incidence	100	High-income North America	3	Both	27	Age-standardized	1048	COVID-19	3	Rate	2021	18279.2	19191.7	17380.3
6	Incidence	104	Caribbean	3	Both	27	Age-standardized	1048	COVID-19	3	Rate	2021	19743.1	28910.4	12753.2
6	Incidence	120	Andean Latin America	3	Both	27	Age-standardized	1048	COVID-19	3	Rate	2021	36607	44235.9	29528.5
6	Incidence	124	Central Latin America	3	Both	27	Age-standardized	1048	COVID-19	3	Rate	2021	31406.4	33698.1	28889
6	Incidence	134	Tropical Latin America	3	Both	27	Age-standardized	1048	COVID-19	3	Rate	2021	35921.6	39681.9	32493.4
6	Incidence	138	North Africa and Middle East	3	Both	27	Age-standardized	1048	COVID-19	3	Rate	2021	34139.9	39516.3	27857.9
6	Incidence	159	South Asia	3	Both	27	Age-standardized	1048	COVID-19	3	Rate	2021	41742.9	45919	37546
6	Incidence	167	Central Sub-Saharan Africa	3	Both	27	Age-standardized	1048	COVID-19	3	Rate	2021	44202	53933.3	33151.7
6	Incidence	174	Eastern Sub-Saharan Africa	3	Both	27	Age-standardized	1048	COVID-19	3	Rate	2021	56618.8	60142	52587
6	Incidence	192	Southern Sub-Saharan Africa	3	Both	27	Age-standardized	1048	COVID-19	3	Rate	2021	47661.1	52003.1	40023
6	Incidence	199	Western Sub-Saharan Africa	3	Both	27	Age-standardized	1048	COVID-19	3	Rate	2021	35642.7	39893.9	31251.9
