# Supplementary material for: Trends and cross-country disparity in the burden of COVID-19 between 2020 and 2021: a systematic analysis for the Global Burden of Disease Study 2021
Source: Research Square preprint supplement (doi:10.21203/rs.3.rs-5109929/v1), 2024-09-24
Supplement: Supplementary file 4 [file de88eb670a39fee03b5633cb.docx]

Table S1. The number and age-standardized rate of COVID-19 incidence, DALYs and death in different age groups worldwide from 2020 and 2021

Table S2. The number and age-standardized rate of COVID-19 incidence, DALYs and death in 21 regions from 2020 and 2021

Table S3. The number and age-standardized rate of COVID-19 incidence, DALYs and death in 204 countries and territories in 2020 and 2021
